# Supplementary material for: Identification of keygenes, miRNAs and miRNA-mRNA regulatory pathways for chemotherapy resistance in ovarian cancer
Source: PeerJ. 2021 Nov 8;9:e12353. doi: 10.7717/peerj.12353 (PMC8582303; doi:10.7717/peerj.12353)
Supplement: Supplemental Information 1 [file peerj-09-12353-s001.xlsx]

## Sheet: 总的靶基因（miRNet)
ID	Target	TargetID	Accession
hsa-mir-15b-3p	ABCD2	225	MIMAT0004586
hsa-mir-15b-3p	XIAP	331	MIMAT0004586
hsa-mir-15b-3p	CACNA1B	774	MIMAT0004586
hsa-mir-15b-3p	CBFA2T3	863	MIMAT0004586
hsa-mir-15b-3p	CCND3	896	MIMAT0004586
hsa-mir-15b-3p	TOR1A	1861	MIMAT0004586
hsa-mir-15b-3p	FASN	2194	MIMAT0004586
hsa-mir-15b-3p	GLO1	2739	MIMAT0004586
hsa-mir-15b-3p	IGF1R	3480	MIMAT0004586
hsa-mir-15b-3p	MYH9	4627	MIMAT0004586
hsa-mir-15b-3p	PCCA	5095	MIMAT0004586
hsa-mir-15b-3p	PLAGL2	5326	MIMAT0004586
hsa-mir-15b-3p	PMAIP1	5366	MIMAT0004586
hsa-mir-15b-3p	PTPRF	5792	MIMAT0004586
hsa-mir-15b-3p	SSFA2	6744	MIMAT0004586
hsa-mir-15b-3p	THRB	7068	MIMAT0004586
hsa-mir-15b-3p	WEE1	7465	MIMAT0004586
hsa-mir-15b-3p	ZNF708	7562	MIMAT0004586
hsa-mir-15b-3p	ZNF28	7576	MIMAT0004586
hsa-mir-15b-3p	ZNF202	7753	MIMAT0004586
hsa-mir-15b-3p	RND2	8153	MIMAT0004586
hsa-mir-15b-3p	RECK	8434	MIMAT0004586
hsa-mir-15b-3p	STX11	8676	MIMAT0004586
hsa-mir-15b-3p	TM9SF2	9375	MIMAT0004586
hsa-mir-15b-3p	TOX4	9878	MIMAT0004586
hsa-mir-15b-3p	PTBP3	9991	MIMAT0004586
hsa-mir-15b-3p	DCTN6	10671	MIMAT0004586
hsa-mir-15b-3p	IFI44L	10964	MIMAT0004586
hsa-mir-15b-3p	TRIM31	11074	MIMAT0004586
hsa-mir-15b-3p	DNAJB4	11080	MIMAT0004586
hsa-mir-15b-3p	ELL2	22936	MIMAT0004586
hsa-mir-15b-3p	SIRT4	23409	MIMAT0004586
hsa-mir-15b-3p	TMEM50A	23585	MIMAT0004586
hsa-mir-15b-3p	PISD	23761	MIMAT0004586
hsa-mir-15b-3p	PRICKLE4	29964	MIMAT0004586
hsa-mir-15b-3p	MINK1	50488	MIMAT0004586
hsa-mir-15b-3p	GLRX5	51218	MIMAT0004586
hsa-mir-15b-3p	IL20RB	53833	MIMAT0004586
hsa-mir-15b-3p	NEURL1B	54492	MIMAT0004586
hsa-mir-15b-3p	TBC1D13	54662	MIMAT0004586
hsa-mir-15b-3p	CNTLN	54875	MIMAT0004586
hsa-mir-15b-3p	SOBP	55084	MIMAT0004586
hsa-mir-15b-3p	C5orf22	55322	MIMAT0004586
hsa-mir-15b-3p	SLC30A6	55676	MIMAT0004586
hsa-mir-15b-3p	NLGN2	57555	MIMAT0004586
hsa-mir-15b-3p	BACH2	60468	MIMAT0004586
hsa-mir-15b-3p	MRPS35	60488	MIMAT0004586
hsa-mir-15b-3p	PLEKHA3	65977	MIMAT0004586
hsa-mir-15b-3p	RETREG2	79137	MIMAT0004586
hsa-mir-15b-3p	GTDC1	79712	MIMAT0004586
hsa-mir-15b-3p	MCMBP	79892	MIMAT0004586
hsa-mir-15b-3p	CSRNP3	80034	MIMAT0004586
hsa-mir-15b-3p	ANKRD27	84079	MIMAT0004586
hsa-mir-15b-3p	GON7	84520	MIMAT0004586
hsa-mir-15b-3p	ZBTB37	84614	MIMAT0004586
hsa-mir-15b-3p	ST6GAL2	84620	MIMAT0004586
hsa-mir-15b-3p	C12orf29	91298	MIMAT0004586
hsa-mir-15b-3p	ARHGAP18	93663	MIMAT0004586
hsa-mir-15b-3p	ABCC12	94160	MIMAT0004586
hsa-mir-15b-3p	ABHD15	116236	MIMAT0004586
hsa-mir-15b-3p	TAF8	129685	MIMAT0004586
hsa-mir-15b-3p	MUC15	143662	MIMAT0004586
hsa-mir-15b-3p	TMED4	222068	MIMAT0004586
hsa-mir-15b-3p	ZC3H12B	340554	MIMAT0004586
hsa-mir-15b-3p	MXRA7	439921	MIMAT0004586
hsa-mir-15b-3p	KIAA0895L	653319	MIMAT0004586
hsa-mir-15b-3p	MYH9	4627	MIMAT0004586
hsa-mir-15b-3p	WEE1	7465	MIMAT0004586
hsa-mir-15b-3p	ELL2	22936	MIMAT0004586
hsa-mir-15b-3p	MINK1	50488	MIMAT0004586
hsa-mir-15b-3p	GLRX5	51218	MIMAT0004586
hsa-mir-15b-3p	ABCC12	94160	MIMAT0004586
hsa-mir-15b-3p	CYP51A1	1595	MIMAT0004586
hsa-mir-15b-3p	SLC7A2	6542	MIMAT0004586
hsa-mir-15b-3p	RECQL	5965	MIMAT0004586
hsa-mir-15b-3p	THSD7A	221981	MIMAT0004586
hsa-mir-15b-3p	BAZ1B	9031	MIMAT0004586
hsa-mir-15b-3p	POLR3B	55703	MIMAT0004586
hsa-mir-15b-3p	CPS1	1373	MIMAT0004586
hsa-mir-15b-3p	AKAP11	11215	MIMAT0004586
hsa-mir-15b-3p	SLC4A7	9497	MIMAT0004586
hsa-mir-15b-3p	VPS13D	55187	MIMAT0004586
hsa-mir-15b-3p	SLC4A8	9498	MIMAT0004586
hsa-mir-15b-3p	TNIP3	79931	MIMAT0004586
hsa-mir-15b-3p	ZC3H11A	9877	MIMAT0004586
hsa-mir-15b-3p	CTSA	5476	MIMAT0004586
hsa-mir-15b-3p	FAR2	55711	MIMAT0004586
hsa-mir-15b-3p	PKN2	5586	MIMAT0004586
hsa-mir-15b-3p	SPEN	23013	MIMAT0004586
hsa-mir-15b-3p	POLR1A	25885	MIMAT0004586
hsa-mir-15b-3p	SMC1A	8243	MIMAT0004586
hsa-mir-15b-3p	LMAN1	3998	MIMAT0004586
hsa-mir-15b-3p	DLG1	1739	MIMAT0004586
hsa-mir-15b-3p	CAPN6	827	MIMAT0004586
hsa-mir-15b-3p	N4BP2	55728	MIMAT0004586
hsa-mir-15b-3p	CXCL2	2920	MIMAT0004586
hsa-mir-15b-3p	STRADB	55437	MIMAT0004586
hsa-mir-15b-3p	TXLNA	200081	MIMAT0004586
hsa-mir-15b-3p	BCORL1	63035	MIMAT0004586
hsa-mir-15b-3p	HUWE1	10075	MIMAT0004586
hsa-mir-15b-3p	FTL	2512	MIMAT0004586
hsa-mir-15b-3p	NID2	22795	MIMAT0004586
hsa-mir-15b-3p	KHSRP	8570	MIMAT0004586
hsa-mir-15b-3p	PDRG1	81572	MIMAT0004586
hsa-mir-15b-3p	PPP1R13B	23368	MIMAT0004586
hsa-mir-15b-3p	ZNF268	10795	MIMAT0004586
hsa-mir-15b-3p	TNRC6A	27327	MIMAT0004586
hsa-mir-15b-3p	TNRC6A	27327	MIMAT0004586
hsa-mir-15b-3p	NUP50	10762	MIMAT0004586
hsa-mir-15b-3p	MAP3K1	4214	MIMAT0004586
hsa-mir-15b-3p	SCD	6319	MIMAT0004586
hsa-mir-15b-3p	MKNK2	2872	MIMAT0004586
hsa-mir-15b-3p	CABP7	164633	MIMAT0004586
hsa-mir-15b-3p	PABPN1	8106	MIMAT0004586
hsa-mir-15b-3p	IFT52	51098	MIMAT0004586
hsa-mir-15b-3p	ADNP	23394	MIMAT0004586
hsa-mir-15b-3p	NFAT5	10725	MIMAT0004586
hsa-mir-15b-3p	USP10	9100	MIMAT0004586
hsa-mir-15b-3p	STK3	6788	MIMAT0004586
hsa-mir-15b-3p	SNX16	64089	MIMAT0004586
hsa-mir-15b-3p	GSR	2936	MIMAT0004586
hsa-mir-15b-3p	CDK6	1021	MIMAT0004586
hsa-mir-15b-3p	MTPN	136319	MIMAT0004586
hsa-mir-15b-3p	RBM28	55131	MIMAT0004586
hsa-mir-15b-3p	ACBD5	91452	MIMAT0004586
hsa-mir-15b-3p	CUL2	8453	MIMAT0004586
hsa-mir-15b-3p	SULT1E1	6783	MIMAT0004586
hsa-mir-15b-3p	RPS13	6207	MIMAT0004586
hsa-mir-15b-3p	RAB5B	5869	MIMAT0004586
hsa-mir-15b-3p	CMAS	55907	MIMAT0004586
hsa-mir-15b-3p	COL12A1	1303	MIMAT0004586
hsa-mir-15b-3p	NNT	23530	MIMAT0004586
hsa-mir-15b-3p	HSPA9	3313	MIMAT0004586
hsa-mir-15b-3p	PDE4D	5144	MIMAT0004586
hsa-mir-15b-3p	PRLR	5618	MIMAT0004586
hsa-mir-15b-3p	UXS1	80146	MIMAT0004586
hsa-mir-15b-3p	ODC1	4953	MIMAT0004586
hsa-mir-15b-3p	SLC25A12	8604	MIMAT0004586
hsa-mir-15b-3p	NFE2L2	4780	MIMAT0004586
hsa-mir-15b-3p	SFPQ	6421	MIMAT0004586
hsa-mir-15b-3p	MTR	4548	MIMAT0004586
hsa-mir-15b-3p	STAG1	10274	MIMAT0004586
hsa-mir-15b-3p	CCND2	894	MIMAT0004586
hsa-mir-15b-3p	ELF1	1997	MIMAT0004586
hsa-mir-15b-3p	RBBP6	5930	MIMAT0004586
hsa-mir-15b-3p	ZNF644	84146	MIMAT0004586
hsa-mir-15b-3p	STIL	6491	MIMAT0004586
hsa-mir-15b-3p	MORF4L2	9643	MIMAT0004586
hsa-mir-15b-3p	ZNF391	346157	MIMAT0004586
hsa-mir-15b-3p	CDKN1A	1026	MIMAT0004586
hsa-mir-15b-3p	MED1	5469	MIMAT0004586
hsa-mir-15b-3p	POT1	25913	MIMAT0004586
hsa-mir-15b-3p	SUMF2	25870	MIMAT0004586
hsa-mir-15b-3p	RPL36	25873	MIMAT0004586
hsa-mir-15b-3p	KIF1A	547	MIMAT0004586
hsa-mir-15b-3p	EXOSC2	23404	MIMAT0004586
hsa-mir-15b-3p	IRS4	8471	MIMAT0004586
hsa-mir-15b-3p	IRS4	8471	MIMAT0004586
hsa-mir-15b-3p	IPO8	10526	MIMAT0004586
hsa-mir-15b-3p	TMED7	51014	MIMAT0004586
hsa-mir-15b-3p	SRPK2	6733	MIMAT0004586
hsa-mir-15b-3p	HNRNPA1	3178	MIMAT0004586
hsa-mir-15b-3p	CD164	8763	MIMAT0004586
hsa-mir-15b-3p	IREB2	3658	MIMAT0004586
hsa-mir-15b-3p	SDCBP	6386	MIMAT0004586
hsa-mir-15b-3p	THBS1	7057	MIMAT0004586
hsa-mir-15b-3p	RBM26	64062	MIMAT0004586
hsa-mir-15b-3p	UBE2Q2	92912	MIMAT0004586
hsa-mir-15b-3p	WDR61	80349	MIMAT0004586
hsa-mir-15b-3p	RNF157	114804	MIMAT0004586
hsa-mir-15b-3p	CBLN2	147381	MIMAT0004586
hsa-mir-15b-3p	ISG20L2	81875	MIMAT0004586
hsa-mir-15b-3p	MCL1	4170	MIMAT0004586
hsa-mir-15b-3p	ENSA	2029	MIMAT0004586
hsa-mir-15b-3p	ETNK2	55224	MIMAT0004586
hsa-mir-15b-3p	DYNLT1	6993	MIMAT0004586
hsa-mir-15b-3p	TMEM168	64418	MIMAT0004586
hsa-mir-15b-3p	NCAPG2	54892	MIMAT0004586
hsa-mir-15b-3p	CASK	8573	MIMAT0004586
hsa-mir-15b-3p	FAM171A1	221061	MIMAT0004586
hsa-mir-15b-3p	EIF4EBP2	1979	MIMAT0004586
hsa-mir-15b-3p	CPSF7	79869	MIMAT0004586
hsa-mir-15b-3p	AKR1C2	1646	MIMAT0004586
hsa-mir-15b-3p	CACUL1	143384	MIMAT0004586
hsa-mir-15b-3p	UHMK1	127933	MIMAT0004586
hsa-mir-15b-3p	LPCAT1	79888	MIMAT0004586
hsa-mir-15b-3p	LPCAT1	79888	MIMAT0004586
hsa-mir-15b-3p	DDAH1	23576	MIMAT0004586
hsa-mir-15b-3p	XPC	7508	MIMAT0004586
hsa-mir-15b-3p	MIER3	166968	MIMAT0004586
hsa-mir-15b-3p	DEPTOR	64798	MIMAT0004586
hsa-mir-15b-3p	PAXIP1	22976	MIMAT0004586
hsa-mir-15b-3p	RER1	11079	MIMAT0004586
hsa-mir-15b-3p	IGF2BP1	10642	MIMAT0004586
hsa-mir-15b-3p	BTG2	7832	MIMAT0004586
hsa-mir-15b-3p	CCDC117	150275	MIMAT0004586
hsa-mir-15b-3p	DFFA	1676	MIMAT0004586
hsa-mir-15b-3p	TAOK1	57551	MIMAT0004586
hsa-mir-15b-3p	GABRB1	2560	MIMAT0004586
hsa-mir-15b-3p	ATP1A1	476	MIMAT0004586
hsa-mir-15b-3p	HEYL	26508	MIMAT0004586
hsa-mir-15b-3p	PBRM1	55193	MIMAT0004586
hsa-mir-15b-3p	FOXK1	221937	MIMAT0004586
hsa-mir-15b-3p	PDZD8	118987	MIMAT0004586
hsa-mir-15b-3p	FAM204A	63877	MIMAT0004586
hsa-mir-15b-3p	SGPL1	8879	MIMAT0004586
hsa-mir-15b-3p	MCM7	4176	MIMAT0004586
hsa-mir-15b-3p	TMED3	23423	MIMAT0004586
hsa-mir-15b-3p	HSP90B1	7184	MIMAT0004586
hsa-mir-15b-3p	VPS37C	55048	MIMAT0004586
hsa-mir-15b-3p	DDIT4	54541	MIMAT0004586
hsa-mir-15b-3p	ADAM9	8754	MIMAT0004586
hsa-mir-15b-3p	ADAM9	8754	MIMAT0004586
hsa-mir-15b-3p	MAT2A	4144	MIMAT0004586
hsa-mir-15b-3p	RAB3B	5865	MIMAT0004586
hsa-mir-15b-3p	CA5B	11238	MIMAT0004586
hsa-mir-15b-3p	NRG4	145957	MIMAT0004586
hsa-mir-15b-3p	HNRNPF	3185	MIMAT0004586
hsa-mir-15b-3p	CSGALNACT2	55454	MIMAT0004586
hsa-mir-15b-3p	KBTBD2	25948	MIMAT0004586
hsa-mir-15b-3p	KIAA0232	9778	MIMAT0004586
hsa-mir-15b-3p	ZNF581	51545	MIMAT0004586
hsa-mir-15b-3p	BPTF	2186	MIMAT0004586
hsa-mir-15b-3p	CAMTA1	23261	MIMAT0004586
hsa-mir-15b-3p	USP19	10869	MIMAT0004586
hsa-mir-15b-3p	PDE3A	5139	MIMAT0004586
hsa-mir-15b-3p	MOB1B	92597	MIMAT0004586
hsa-mir-15b-3p	CHST2	9435	MIMAT0004586
hsa-mir-15b-3p	LYSMD3	116068	MIMAT0004586
hsa-mir-15b-3p	MYPOP	339344	MIMAT0004586
hsa-mir-15b-3p	LPCAT4	254531	MIMAT0004586
hsa-mir-15b-3p	HNRNPA0	10949	MIMAT0004586
hsa-mir-15b-3p	GALNT11	63917	MIMAT0004586
hsa-mir-15b-3p	GEN1	348654	MIMAT0004586
hsa-mir-15b-3p	TMEM107	84314	MIMAT0004586
hsa-mir-15b-3p	TMEM64	169200	MIMAT0004586
hsa-mir-15b-3p	BHLHE22	27319	MIMAT0004586
hsa-mir-15b-3p	PLAG1	5324	MIMAT0004586
hsa-mir-15b-3p	PRKAG1	5571	MIMAT0004586
hsa-mir-15b-3p	ACBD3	64746	MIMAT0004586
hsa-mir-15b-3p	PRKX	5613	MIMAT0004586
hsa-mir-15b-3p	SLITRK6	84189	MIMAT0004586
hsa-mir-15b-3p	C6orf120	387263	MIMAT0004586
hsa-mir-15b-3p	ZNF397	84307	MIMAT0004586
hsa-mir-15b-3p	COL14A1	7373	MIMAT0004586
hsa-mir-15b-3p	ZNF292	23036	MIMAT0004586
hsa-mir-15b-3p	AKR1C3	8644	MIMAT0004586
hsa-mir-15b-3p	ACADSB	36	MIMAT0004586
hsa-mir-15b-3p	FAM217B	63939	MIMAT0004586
hsa-mir-15b-3p	ZNF774	342132	MIMAT0004586
hsa-mir-15b-3p	PIK3R4	30849	MIMAT0004586
hsa-mir-15b-3p	HIBCH	26275	MIMAT0004586
hsa-mir-15b-3p	SULT1C2	6819	MIMAT0004586
hsa-mir-15b-3p	HELZ	9931	MIMAT0004586
hsa-mir-15b-3p	TXNRD1	7296	MIMAT0004586
hsa-mir-15b-3p	C6orf89	221477	MIMAT0004586
hsa-mir-15b-3p	TAP2	6891	MIMAT0004586
hsa-mir-15b-3p	TAP2	6891	MIMAT0004586
hsa-mir-15b-3p	TAP2	6891	MIMAT0004586
hsa-mir-15b-3p	TAP2	6891	MIMAT0004586
hsa-mir-15b-3p	TAP2	6891	MIMAT0004586
hsa-mir-15b-3p	TAP2	6891	MIMAT0004586
hsa-mir-15b-3p	TAP2	6891	MIMAT0004586
hsa-mir-15b-3p	TAP2	6891	MIMAT0004586
hsa-mir-15b-3p	ITGA1	3672	MIMAT0004586
hsa-mir-15b-3p	ZNF726	730087	MIMAT0004586
hsa-mir-15b-3p	EFNA4	1945	MIMAT0004586
hsa-mir-15b-3p	ADH1C	126	MIMAT0004586
hsa-mir-299-5p	ACTC1	70	MIMAT0002890
hsa-mir-299-5p	ATP6V1A	523	MIMAT0002890
hsa-mir-299-5p	CDKN1A	1026	MIMAT0002890
hsa-mir-299-5p	FOLR1	2348	MIMAT0002890
hsa-mir-299-5p	H3F3B	3021	MIMAT0002890
hsa-mir-299-5p	HIF1A	3091	MIMAT0002890
hsa-mir-299-5p	LDLR	3949	MIMAT0002890
hsa-mir-299-5p	NEUROD1	4760	MIMAT0002890
hsa-mir-299-5p	PBX2P1	5088	MIMAT0002890
hsa-mir-299-5p	RGL2	5863	MIMAT0002890
hsa-mir-299-5p	ROBO1	6091	MIMAT0002890
hsa-mir-299-5p	SOX4	6659	MIMAT0002890
hsa-mir-299-5p	SPP1	6696	MIMAT0002890
hsa-mir-299-5p	STRN	6801	MIMAT0002890
hsa-mir-299-5p	HIST1H2BE	8344	MIMAT0002890
hsa-mir-299-5p	RECK	8434	MIMAT0002890
hsa-mir-299-5p	STX16	8675	MIMAT0002890
hsa-mir-299-5p	HIST1H3F	8968	MIMAT0002890
hsa-mir-299-5p	ATG5	9474	MIMAT0002890
hsa-mir-299-5p	SAE1	10055	MIMAT0002890
hsa-mir-299-5p	PLXNC1	10154	MIMAT0002890
hsa-mir-299-5p	ZNF256	10172	MIMAT0002890
hsa-mir-299-5p	HAX1	10456	MIMAT0002890
hsa-mir-299-5p	HOXB13	10481	MIMAT0002890
hsa-mir-299-5p	SLC35A1	10559	MIMAT0002890
hsa-mir-299-5p	POLQ	10721	MIMAT0002890
hsa-mir-299-5p	RAB10	10890	MIMAT0002890
hsa-mir-299-5p	TCERG1	10915	MIMAT0002890
hsa-mir-299-5p	PAPD7	11044	MIMAT0002890
hsa-mir-299-5p	SEC63	11231	MIMAT0002890
hsa-mir-299-5p	RAB21	23011	MIMAT0002890
hsa-mir-299-5p	TNRC6B	23112	MIMAT0002890
hsa-mir-299-5p	TBC1D1	23216	MIMAT0002890
hsa-mir-299-5p	CTDNEP1	23399	MIMAT0002890
hsa-mir-299-5p	ARIH1	25820	MIMAT0002890
hsa-mir-299-5p	TNRC6A	27327	MIMAT0002890
hsa-mir-299-5p	CERS2	29956	MIMAT0002890
hsa-mir-299-5p	HDGFL3	50810	MIMAT0002890
hsa-mir-299-5p	DCTN4	51164	MIMAT0002890
hsa-mir-299-5p	KLF3	51274	MIMAT0002890
hsa-mir-299-5p	LIMA1	51474	MIMAT0002890
hsa-mir-299-5p	PHAX	51808	MIMAT0002890
hsa-mir-299-5p	POLE3	54107	MIMAT0002890
hsa-mir-299-5p	DCAF16	54876	MIMAT0002890
hsa-mir-299-5p	PSPC1	55269	MIMAT0002890
hsa-mir-299-5p	KLHL42	57542	MIMAT0002890
hsa-mir-299-5p	CREBZF	58487	MIMAT0002890
hsa-mir-299-5p	ZBTB10	65986	MIMAT0002890
hsa-mir-299-5p	EDEM3	80267	MIMAT0002890
hsa-mir-299-5p	CLPB	81570	MIMAT0002890
hsa-mir-299-5p	CDCA7	83879	MIMAT0002890
hsa-mir-299-5p	DCUN1D5	84259	MIMAT0002890
hsa-mir-299-5p	EIF1AD	84285	MIMAT0002890
hsa-mir-299-5p	SLX4	84464	MIMAT0002890
hsa-mir-299-5p	TSLP	85480	MIMAT0002890
hsa-mir-299-5p	H2AFV	94239	MIMAT0002890
hsa-mir-299-5p	LRRC15	131578	MIMAT0002890
hsa-mir-299-5p	FAM84A	151354	MIMAT0002890
hsa-mir-299-5p	CNKSR3	154043	MIMAT0002890
hsa-mir-299-5p	TVP23C	201158	MIMAT0002890
hsa-mir-299-5p	ARL5B	221079	MIMAT0002890
hsa-mir-299-5p	SFT2D2	375035	MIMAT0002890
hsa-mir-299-5p	MTRNR2L2	100462981	MIMAT0002890
hsa-mir-299-5p	ATP6V1A	523	MIMAT0002890
hsa-mir-299-5p	CDKN1A	1026	MIMAT0002890
hsa-mir-299-5p	STX16	8675	MIMAT0002890
hsa-mir-299-5p	CNKSR3	154043	MIMAT0002890
hsa-mir-299-5p	KIAA0100	9703	MIMAT0002890
hsa-mir-299-5p	RB1CC1	9821	MIMAT0002890
hsa-mir-299-5p	PUM2	23369	MIMAT0002890
hsa-mir-299-5p	HDAC4	9759	MIMAT0002890
hsa-mir-299-5p	IFT80	57560	MIMAT0002890
hsa-mir-299-5p	BAZ2A	11176	MIMAT0002890
hsa-mir-299-5p	TPX2	22974	MIMAT0002890
hsa-mir-299-5p	DDX24	57062	MIMAT0002890
hsa-mir-299-5p	DDX24	57062	MIMAT0002890
hsa-mir-299-5p	CREM	1390	MIMAT0002890
hsa-mir-299-5p	HNRNPH3	3189	MIMAT0002890
hsa-mir-299-5p	DNAJC5	80331	MIMAT0002890
hsa-mir-299-5p	CDC25B	994	MIMAT0002890
hsa-mir-299-5p	LACTB	114294	MIMAT0002890
hsa-mir-299-5p	MTPN	136319	MIMAT0002890
hsa-mir-299-5p	SERPINE1	5054	MIMAT0002890
hsa-mir-299-5p	MAP3K8	1326	MIMAT0002890
hsa-mir-299-5p	PFN1	5216	MIMAT0002890
hsa-mir-299-5p	COL1A1	1277	MIMAT0002890
hsa-mir-299-5p	TPI1	7167	MIMAT0002890
hsa-mir-299-5p	SOD2	6648	MIMAT0002890
hsa-mir-299-5p	SOD2	6648	MIMAT0002890
hsa-mir-299-5p	MAN2A1	4124	MIMAT0002890
hsa-mir-299-5p	FN1	2335	MIMAT0002890
hsa-mir-299-5p	IGFBP5	3488	MIMAT0002890
hsa-mir-299-5p	FHL2	2274	MIMAT0002890
hsa-mir-299-5p	ERRFI1	54206	MIMAT0002890
hsa-mir-299-5p	LEPR	3953	MIMAT0002890
hsa-mir-299-5p	SGK1	6446	MIMAT0002890
hsa-mir-299-5p	MED28	80306	MIMAT0002890
hsa-mir-299-5p	CCNI	10983	MIMAT0002890
hsa-mir-299-5p	CPXM2	119587	MIMAT0002890
hsa-mir-299-5p	PPP1R12C	54776	MIMAT0002890
hsa-mir-299-5p	CALU	813	MIMAT0002890
hsa-mir-299-5p	TTBK2	146057	MIMAT0002890
hsa-mir-299-5p	COPB1	1315	MIMAT0002890
hsa-mir-299-5p	OSER1	51526	MIMAT0002890
hsa-mir-299-5p	EMP1	2012	MIMAT0002890
hsa-mir-299-5p	YAP1	10413	MIMAT0002890
hsa-mir-299-5p	ARHGAP29	9411	MIMAT0002890
hsa-mir-299-5p	SCARB2	950	MIMAT0002890
hsa-mir-299-5p	LUM	4060	MIMAT0002890
hsa-mir-299-5p	APP	351	MIMAT0002890
hsa-mir-299-5p	SSRP1	6749	MIMAT0002890
hsa-mir-299-5p	TMEM132D	121256	MIMAT0002890
hsa-mir-299-5p	NUP35	129401	MIMAT0002890
hsa-mir-299-5p	PDLIM5	10611	MIMAT0002890
hsa-mir-299-5p	HIPK1	204851	MIMAT0002890
hsa-mir-299-5p	ANXA5	308	MIMAT0002890
hsa-mir-299-5p	PRMT9	90826	MIMAT0002890
hsa-mir-299-5p	CTSB	1508	MIMAT0002890
hsa-mir-299-5p	CTSB	1508	MIMAT0002890
hsa-mir-299-5p	NFIL3	4783	MIMAT0002890
hsa-mir-299-5p	NSD1	64324	MIMAT0002890
hsa-mir-299-5p	TBC1D2B	23102	MIMAT0002890
hsa-mir-299-5p	IGF2	3481	MIMAT0002890
hsa-mir-299-5p	GPX4	2879	MIMAT0002890
hsa-mir-299-5p	TTC39C	125488	MIMAT0002890
hsa-mir-299-5p	SMIM4	440957	MIMAT0002890
hsa-mir-299-5p	FEM1B	10116	MIMAT0002890
hsa-mir-299-5p	UGP2	7360	MIMAT0002890
hsa-mir-299-5p	ARL6IP1	23204	MIMAT0002890
hsa-mir-299-5p	PRNP	5621	MIMAT0002890
hsa-mir-299-5p	ZNF217	7764	MIMAT0002890
hsa-mir-299-5p	TNFSF15	9966	MIMAT0002890
hsa-mir-299-5p	SIAH2	6478	MIMAT0002890
hsa-mir-299-5p	EXOC7	23265	MIMAT0002890
hsa-mir-299-5p	ANXA2	302	MIMAT0002890
hsa-mir-299-5p	SOCS3	9021	MIMAT0002890
hsa-mir-299-5p	SP1	6667	MIMAT0002890
hsa-mir-299-5p	ZNF197	10168	MIMAT0002890
hsa-mir-299-5p	ZNF197	10168	MIMAT0002890
hsa-mir-299-5p	TEAD1	7003	MIMAT0002890
hsa-mir-299-5p	COL4A1	1282	MIMAT0002890
hsa-mir-299-5p	MPHOSPH8	54737	MIMAT0002890
hsa-mir-299-5p	PRPF40A	55660	MIMAT0002890
hsa-mir-299-5p	TAF13	6884	MIMAT0002890
hsa-mir-299-5p	SCAMP5	192683	MIMAT0002890
hsa-mir-299-5p	TCTN1	79600	MIMAT0002890
hsa-mir-299-5p	TMEM178B	100507421	MIMAT0002890
hsa-mir-337-3p	CASP1	834	MIMAT0000754
hsa-mir-337-3p	RUNX1T1	862	MIMAT0000754
hsa-mir-337-3p	CNN3	1266	MIMAT0000754
hsa-mir-337-3p	CSNK2A1	1457	MIMAT0000754
hsa-mir-337-3p	DDX3X	1654	MIMAT0000754
hsa-mir-337-3p	DDX6	1656	MIMAT0000754
hsa-mir-337-3p	FPR1	2357	MIMAT0000754
hsa-mir-337-3p	IFIT3	3437	MIMAT0000754
hsa-mir-337-3p	MTF1	4520	MIMAT0000754
hsa-mir-337-3p	NFATC3	4775	MIMAT0000754
hsa-mir-337-3p	OPRM1	4988	MIMAT0000754
hsa-mir-337-3p	PKN2	5586	MIMAT0000754
hsa-mir-337-3p	PURB	5814	MIMAT0000754
hsa-mir-337-3p	RAP1A	5906	MIMAT0000754
hsa-mir-337-3p	REL	5966	MIMAT0000754
hsa-mir-337-3p	SNRPD1	6632	MIMAT0000754
hsa-mir-337-3p	SPN	6693	MIMAT0000754
hsa-mir-337-3p	STAT3	6774	MIMAT0000754
hsa-mir-337-3p	TFAM	7019	MIMAT0000754
hsa-mir-337-3p	TRPS1	7227	MIMAT0000754
hsa-mir-337-3p	MZF1	7593	MIMAT0000754
hsa-mir-337-3p	PCGF2	7703	MIMAT0000754
hsa-mir-337-3p	FXR1	8087	MIMAT0000754
hsa-mir-337-3p	COIL	8161	MIMAT0000754
hsa-mir-337-3p	GAS7	8522	MIMAT0000754
hsa-mir-337-3p	RNMT	8731	MIMAT0000754
hsa-mir-337-3p	MBD2	8932	MIMAT0000754
hsa-mir-337-3p	CLDN1	9076	MIMAT0000754
hsa-mir-337-3p	GPRIN2	9721	MIMAT0000754
hsa-mir-337-3p	USP3	9960	MIMAT0000754
hsa-mir-337-3p	TSPAN3	10099	MIMAT0000754
hsa-mir-337-3p	RNF41	10193	MIMAT0000754
hsa-mir-337-3p	COQ7	10229	MIMAT0000754
hsa-mir-337-3p	KIF1C	10749	MIMAT0000754
hsa-mir-337-3p	ZNF652	22834	MIMAT0000754
hsa-mir-337-3p	ZFP30	22835	MIMAT0000754
hsa-mir-337-3p	ATP11A	23250	MIMAT0000754
hsa-mir-337-3p	PIGN	23556	MIMAT0000754
hsa-mir-337-3p	KPNA6	23633	MIMAT0000754
hsa-mir-337-3p	SRPX2	27286	MIMAT0000754
hsa-mir-337-3p	RDH11	51109	MIMAT0000754
hsa-mir-337-3p	COMMD2	51122	MIMAT0000754
hsa-mir-337-3p	CRIM1	51232	MIMAT0000754
hsa-mir-337-3p	TRPV2	51393	MIMAT0000754
hsa-mir-337-3p	ZNF107	51427	MIMAT0000754
hsa-mir-337-3p	ROBO4	54538	MIMAT0000754
hsa-mir-337-3p	TBC1D13	54662	MIMAT0000754
hsa-mir-337-3p	ESRP1	54845	MIMAT0000754
hsa-mir-337-3p	2021-03-01	55016	MIMAT0000754
hsa-mir-337-3p	ZWILCH	55055	MIMAT0000754
hsa-mir-337-3p	TMEM248	55069	MIMAT0000754
hsa-mir-337-3p	CDC42BPG	55561	MIMAT0000754
hsa-mir-337-3p	CDKN2AIP	55602	MIMAT0000754
hsa-mir-337-3p	MTA3	57504	MIMAT0000754
hsa-mir-337-3p	SNX16	64089	MIMAT0000754
hsa-mir-337-3p	PAPD5	64282	MIMAT0000754
hsa-mir-337-3p	PANK3	79646	MIMAT0000754
hsa-mir-337-3p	VASH2	79805	MIMAT0000754
hsa-mir-337-3p	ACTR5	79913	MIMAT0000754
hsa-mir-337-3p	L2HGDH	79944	MIMAT0000754
hsa-mir-337-3p	APOL6	80830	MIMAT0000754
hsa-mir-337-3p	LNPK	80856	MIMAT0000754
hsa-mir-337-3p	HOPX	84525	MIMAT0000754
hsa-mir-337-3p	ZNF347	84671	MIMAT0000754
hsa-mir-337-3p	NXPE3	91775	MIMAT0000754
hsa-mir-337-3p	TBCK	93627	MIMAT0000754
hsa-mir-337-3p	TRABD2A	129293	MIMAT0000754
hsa-mir-337-3p	SESN3	143686	MIMAT0000754
hsa-mir-337-3p	BEST3	144453	MIMAT0000754
hsa-mir-337-3p	C1orf210	149466	MIMAT0000754
hsa-mir-337-3p	ITPRIPL1	150771	MIMAT0000754
hsa-mir-337-3p	GDF7	151449	MIMAT0000754
hsa-mir-337-3p	ZDHHC15	158866	MIMAT0000754
hsa-mir-337-3p	IBA57	200205	MIMAT0000754
hsa-mir-337-3p	SMIM14	201895	MIMAT0000754
hsa-mir-337-3p	RICTOR	253260	MIMAT0000754
hsa-mir-337-3p	ZDHHC23	254887	MIMAT0000754
hsa-mir-337-3p	ZNF326	284695	MIMAT0000754
hsa-mir-337-3p	LIN9	286826	MIMAT0000754
hsa-mir-337-3p	PLEKHG7	440107	MIMAT0000754
hsa-mir-337-3p	TMEM236	653567	MIMAT0000754
hsa-mir-337-3p	CSNK2A1	1457	MIMAT0000754
hsa-mir-337-3p	FHL1	2273	MIMAT0000754
hsa-mir-337-3p	TGFBR1	7046	MIMAT0000754
hsa-mir-337-3p	LOX	4015	MIMAT0000754
hsa-mir-337-3p	PDGFRB	5159	MIMAT0000754
hsa-mir-337-3p	ACTR3	10096	MIMAT0000754
hsa-mir-337-3p	CPEB2	132864	MIMAT0000754
hsa-mir-337-3p	CPEB2	132864	MIMAT0000754
hsa-mir-337-3p	THBS2	7058	MIMAT0000754
hsa-mir-379-3p	ADM	133	MIMAT0004690
hsa-mir-379-3p	AP1G1	164	MIMAT0004690
hsa-mir-379-3p	ATP1B3	483	MIMAT0004690
hsa-mir-379-3p	B2M	567	MIMAT0004690
hsa-mir-379-3p	BMI1	648	MIMAT0004690
hsa-mir-379-3p	CAPZA2	830	MIMAT0004690
hsa-mir-379-3p	CPE	1363	MIMAT0004690
hsa-mir-379-3p	ELK4	2005	MIMAT0004690
hsa-mir-379-3p	GLO1	2739	MIMAT0004690
hsa-mir-379-3p	UBE2K	3093	MIMAT0004690
hsa-mir-379-3p	HOXA10	3206	MIMAT0004690
hsa-mir-379-3p	FOXN2	3344	MIMAT0004690
hsa-mir-379-3p	IGFBP5	3488	MIMAT0004690
hsa-mir-379-3p	INSIG1	3638	MIMAT0004690
hsa-mir-379-3p	NRF1	4899	MIMAT0004690
hsa-mir-379-3p	PMAIP1	5366	MIMAT0004690
hsa-mir-379-3p	PPP2R1B	5519	MIMAT0004690
hsa-mir-379-3p	PTGS2	5743	MIMAT0004690
hsa-mir-379-3p	RAP1B	5908	MIMAT0004690
hsa-mir-379-3p	SKP1	6500	MIMAT0004690
hsa-mir-379-3p	SYPL1	6856	MIMAT0004690
hsa-mir-379-3p	TFDP1	7027	MIMAT0004690
hsa-mir-379-3p	THBS1	7057	MIMAT0004690
hsa-mir-379-3p	TJP1	7082	MIMAT0004690
hsa-mir-379-3p	SHOC2	8036	MIMAT0004690
hsa-mir-379-3p	FXR1	8087	MIMAT0004690
hsa-mir-379-3p	FZD6	8323	MIMAT0004690
hsa-mir-379-3p	HIST1H3H	8357	MIMAT0004690
hsa-mir-379-3p	DYRK2	8445	MIMAT0004690
hsa-mir-379-3p	SOCS1	8651	MIMAT0004690
hsa-mir-379-3p	ROCK2	9475	MIMAT0004690
hsa-mir-379-3p	COL4A3BP	10087	MIMAT0004690
hsa-mir-379-3p	SCML2	10389	MIMAT0004690
hsa-mir-379-3p	RABAC1	10567	MIMAT0004690
hsa-mir-379-3p	CD226	10666	MIMAT0004690
hsa-mir-379-3p	GNA13	10672	MIMAT0004690
hsa-mir-379-3p	ZNF460	10794	MIMAT0004690
hsa-mir-379-3p	ZNF652	22834	MIMAT0004690
hsa-mir-379-3p	SAMD4A	23034	MIMAT0004690
hsa-mir-379-3p	HIC2	23119	MIMAT0004690
hsa-mir-379-3p	OTUD3	23252	MIMAT0004690
hsa-mir-379-3p	BRD4	23476	MIMAT0004690
hsa-mir-379-3p	ATRNL1	26033	MIMAT0004690
hsa-mir-379-3p	ARRDC2	27106	MIMAT0004690
hsa-mir-379-3p	MMADHC	27249	MIMAT0004690
hsa-mir-379-3p	TUBD1	51174	MIMAT0004690
hsa-mir-379-3p	RSL24D1	51187	MIMAT0004690
hsa-mir-379-3p	AZIN1	51582	MIMAT0004690
hsa-mir-379-3p	ERRFI1	54206	MIMAT0004690
hsa-mir-379-3p	GIN1	54826	MIMAT0004690
hsa-mir-379-3p	FBXW7	55294	MIMAT0004690
hsa-mir-379-3p	FEM1A	55527	MIMAT0004690
hsa-mir-379-3p	C8orf4	56892	MIMAT0004690
hsa-mir-379-3p	ACTR3B	57180	MIMAT0004690
hsa-mir-379-3p	SH3TC2	79628	MIMAT0004690
hsa-mir-379-3p	ALG9	79796	MIMAT0004690
hsa-mir-379-3p	SIKE1	80143	MIMAT0004690
hsa-mir-379-3p	RAB11FIP1	80223	MIMAT0004690
hsa-mir-379-3p	NETO2	81831	MIMAT0004690
hsa-mir-379-3p	FSD1L	83856	MIMAT0004690
hsa-mir-379-3p	FYTTD1	84248	MIMAT0004690
hsa-mir-379-3p	CCDC74A	90557	MIMAT0004690
hsa-mir-379-3p	CCDC74B	91409	MIMAT0004690
hsa-mir-379-3p	NXPE3	91775	MIMAT0004690
hsa-mir-379-3p	LENG9	94059	MIMAT0004690
hsa-mir-379-3p	FNIP1	96459	MIMAT0004690
hsa-mir-379-3p	MYL12B	103910	MIMAT0004690
hsa-mir-379-3p	C5orf24	134553	MIMAT0004690
hsa-mir-379-3p	PM20D2	135293	MIMAT0004690
hsa-mir-379-3p	SPTY2D1	144108	MIMAT0004690
hsa-mir-379-3p	MIPOL1	145282	MIMAT0004690
hsa-mir-379-3p	SPRED1	161742	MIMAT0004690
hsa-mir-379-3p	PGBD4	161779	MIMAT0004690
hsa-mir-379-3p	ZNF449	203523	MIMAT0004690
hsa-mir-379-3p	JAZF1	221895	MIMAT0004690
hsa-mir-379-3p	RNF144B	255488	MIMAT0004690
hsa-mir-379-3p	SGMS1	259230	MIMAT0004690
hsa-mir-379-3p	NUDT7	283927	MIMAT0004690
hsa-mir-379-3p	PTAR1	375743	MIMAT0004690
hsa-mir-379-3p	NOTCH2NL	388677	MIMAT0004690
hsa-mir-379-3p	ACBD7	414149	MIMAT0004690
hsa-mir-379-3p	ACTR3C	653857	MIMAT0004690
hsa-mir-379-3p	FAM182B	728882	MIMAT0004690
hsa-mir-379-3p	COMMD3-BMI1	100532731	MIMAT0004690
hsa-mir-379-3p	ADM	133	MIMAT0004690
hsa-mir-379-3p	TJP1	7082	MIMAT0004690
hsa-mir-379-3p	BRD4	23476	MIMAT0004690
hsa-mir-379-3p	RAB11FIP1	80223	MIMAT0004690
hsa-mir-379-3p	CRY1	1407	MIMAT0004690
hsa-mir-379-3p	RORA	6095	MIMAT0004690
hsa-mir-379-3p	ALDH3A2	224	MIMAT0004690
hsa-mir-379-3p	ST13	6767	MIMAT0004690
hsa-mir-379-3p	TMEM33	55161	MIMAT0004690
hsa-mir-379-3p	TRIM2	23321	MIMAT0004690
hsa-mir-379-3p	RSRC2	65117	MIMAT0004690
hsa-mir-379-3p	MGP	4256	MIMAT0004690
hsa-mir-379-3p	GLS	2744	MIMAT0004690
hsa-mir-379-3p	DNAJC16	23341	MIMAT0004690
hsa-mir-379-3p	RHOQ	23433	MIMAT0004690
hsa-mir-379-3p	ETF1	2107	MIMAT0004690
hsa-mir-379-3p	CANX	821	MIMAT0004690
hsa-mir-379-3p	CANX	821	MIMAT0004690
hsa-mir-379-3p	RAB3IP	117177	MIMAT0004690
hsa-mir-379-3p	COX7B	1349	MIMAT0004690
hsa-mir-379-3p	MAP1B	4131	MIMAT0004690
hsa-mir-379-3p	AGO4	192670	MIMAT0004690
hsa-mir-379-3p	EGLN1	54583	MIMAT0004690
hsa-mir-379-3p	YME1L1	10730	MIMAT0004690
hsa-mir-379-3p	ENPP2	5168	MIMAT0004690
hsa-mir-379-3p	LRRC1	55227	MIMAT0004690
hsa-mir-379-3p	GLCE	26035	MIMAT0004690
hsa-mir-379-3p	COPS4	51138	MIMAT0004690
hsa-mir-379-3p	ETNK1	55500	MIMAT0004690
hsa-mir-379-3p	IGF1R	3480	MIMAT0004690
hsa-mir-379-3p	RHOB	388	MIMAT0004690
hsa-mir-379-3p	PHLDB2	90102	MIMAT0004690
hsa-mir-379-3p	SCG5	6447	MIMAT0004690
hsa-mir-379-3p	SCG5	6447	MIMAT0004690
hsa-mir-379-3p	SCG5	6447	MIMAT0004690
hsa-mir-379-3p	PRPF8	10594	MIMAT0004690
hsa-mir-379-3p	PRPF8	10594	MIMAT0004690
hsa-mir-379-3p	TMEM50A	23585	MIMAT0004690
hsa-mir-379-3p	CHP1	11261	MIMAT0004690
hsa-mir-379-3p	ZNF789	285989	MIMAT0004690
hsa-mir-454-3p	ACVR1	90	MIMAT0003885
hsa-mir-454-3p	ADARB2	105	MIMAT0003885
hsa-mir-454-3p	PARP1	142	MIMAT0003885
hsa-mir-454-3p	ABCD2	225	MIMAT0003885
hsa-mir-454-3p	XIAP	331	MIMAT0003885
hsa-mir-454-3p	ARHGAP1	392	MIMAT0003885
hsa-mir-454-3p	ARSA	410	MIMAT0003885
hsa-mir-454-3p	ATP6V1B2	526	MIMAT0003885
hsa-mir-454-3p	ATP6V1C1	528	MIMAT0003885
hsa-mir-454-3p	BMP3	651	MIMAT0003885
hsa-mir-454-3p	BTG1	694	MIMAT0003885
hsa-mir-454-3p	CALM2	805	MIMAT0003885
hsa-mir-454-3p	CCNA2	890	MIMAT0003885
hsa-mir-454-3p	CCND2	894	MIMAT0003885
hsa-mir-454-3p	CCT6A	908	MIMAT0003885
hsa-mir-454-3p	CDK4	1019	MIMAT0003885
hsa-mir-454-3p	CFL2	1073	MIMAT0003885
hsa-mir-454-3p	CLCN3	1182	MIMAT0003885
hsa-mir-454-3p	TPP1	1200	MIMAT0003885
hsa-mir-454-3p	CCR6	1235	MIMAT0003885
hsa-mir-454-3p	KLF6	1316	MIMAT0003885
hsa-mir-454-3p	SLC31A1	1317	MIMAT0003885
hsa-mir-454-3p	COX10	1352	MIMAT0003885
hsa-mir-454-3p	CSNK2A1	1457	MIMAT0003885
hsa-mir-454-3p	DAD1	1603	MIMAT0003885
hsa-mir-454-3p	DAPK1	1612	MIMAT0003885
hsa-mir-454-3p	DDX6	1656	MIMAT0003885
hsa-mir-454-3p	DYNC1LI2	1783	MIMAT0003885
hsa-mir-454-3p	DPYSL2	1808	MIMAT0003885
hsa-mir-454-3p	EDN1	1906	MIMAT0003885
hsa-mir-454-3p	EREG	2069	MIMAT0003885
hsa-mir-454-3p	ESR1	2099	MIMAT0003885
hsa-mir-454-3p	F2RL1	2150	MIMAT0003885
hsa-mir-454-3p	ACSL4	2182	MIMAT0003885
hsa-mir-454-3p	FKTN	2218	MIMAT0003885
hsa-mir-454-3p	FLNC	2318	MIMAT0003885
hsa-mir-454-3p	G6PC	2538	MIMAT0003885
hsa-mir-454-3p	GMFB	2764	MIMAT0003885
hsa-mir-454-3p	GP2	2813	MIMAT0003885
hsa-mir-454-3p	GRB10	2887	MIMAT0003885
hsa-mir-454-3p	GRSF1	2926	MIMAT0003885
hsa-mir-454-3p	HADHB	3032	MIMAT0003885
hsa-mir-454-3p	HOXA5	3202	MIMAT0003885
hsa-mir-454-3p	HOXB3	3213	MIMAT0003885
hsa-mir-454-3p	HOXD11	3237	MIMAT0003885
hsa-mir-454-3p	HPRT1	3251	MIMAT0003885
hsa-mir-454-3p	HSPA8	3312	MIMAT0003885
hsa-mir-454-3p	IGF2R	3482	MIMAT0003885
hsa-mir-454-3p	IGFBP5	3488	MIMAT0003885
hsa-mir-454-3p	IRF1	3659	MIMAT0003885
hsa-mir-454-3p	JARID2	3720	MIMAT0003885
hsa-mir-454-3p	KCNB1	3745	MIMAT0003885
hsa-mir-454-3p	KLRD1	3824	MIMAT0003885
hsa-mir-454-3p	LDLR	3949	MIMAT0003885
hsa-mir-454-3p	LIPA	3988	MIMAT0003885
hsa-mir-454-3p	SMAD4	4089	MIMAT0003885
hsa-mir-454-3p	MBNL1	4154	MIMAT0003885
hsa-mir-454-3p	MCC	4163	MIMAT0003885
hsa-mir-454-3p	MAP3K9	4293	MIMAT0003885
hsa-mir-454-3p	MOCS2	4338	MIMAT0003885
hsa-mir-454-3p	TRIM37	4591	MIMAT0003885
hsa-mir-454-3p	MYH11	4629	MIMAT0003885
hsa-mir-454-3p	NARS	4677	MIMAT0003885
hsa-mir-454-3p	NF2	4771	MIMAT0003885
hsa-mir-454-3p	NFE2L1	4779	MIMAT0003885
hsa-mir-454-3p	NFIB	4781	MIMAT0003885
hsa-mir-454-3p	CNOT4	4850	MIMAT0003885
hsa-mir-454-3p	NPTX1	4884	MIMAT0003885
hsa-mir-454-3p	OMD	4958	MIMAT0003885
hsa-mir-454-3p	ORC1	4998	MIMAT0003885
hsa-mir-454-3p	OSBP	5007	MIMAT0003885
hsa-mir-454-3p	PCSK6	5046	MIMAT0003885
hsa-mir-454-3p	PAFAH1B2	5049	MIMAT0003885
hsa-mir-454-3p	PEX13	5194	MIMAT0003885
hsa-mir-454-3p	PIGA	5277	MIMAT0003885
hsa-mir-454-3p	POLR2A	5430	MIMAT0003885
hsa-mir-454-3p	POLR2D	5433	MIMAT0003885
hsa-mir-454-3p	PPP1R7	5510	MIMAT0003885
hsa-mir-454-3p	PRKAA1	5562	MIMAT0003885
hsa-mir-454-3p	PRKCSH	5589	MIMAT0003885
hsa-mir-454-3p	MAPK1	5594	MIMAT0003885
hsa-mir-454-3p	PRNP	5621	MIMAT0003885
hsa-mir-454-3p	PSMB5	5693	MIMAT0003885
hsa-mir-454-3p	QSOX1	5768	MIMAT0003885
hsa-mir-454-3p	PTPN4	5775	MIMAT0003885
hsa-mir-454-3p	PTPRG	5793	MIMAT0003885
hsa-mir-454-3p	RAB5B	5869	MIMAT0003885
hsa-mir-454-3p	RAG1	5896	MIMAT0003885
hsa-mir-454-3p	RAN	5901	MIMAT0003885
hsa-mir-454-3p	RFC2	5982	MIMAT0003885
hsa-mir-454-3p	RFXAP	5994	MIMAT0003885
hsa-mir-454-3p	RPL4	6124	MIMAT0003885
hsa-mir-454-3p	RPS15A	6210	MIMAT0003885
hsa-mir-454-3p	RPS27A	6233	MIMAT0003885
hsa-mir-454-3p	CLIP1	6249	MIMAT0003885
hsa-mir-454-3p	MSMO1	6307	MIMAT0003885
hsa-mir-454-3p	CXCL12	6387	MIMAT0003885
hsa-mir-454-3p	SRSF2	6427	MIMAT0003885
hsa-mir-454-3p	SNTB1	6641	MIMAT0003885
hsa-mir-454-3p	SNTB2	6645	MIMAT0003885
hsa-mir-454-3p	SOX4	6659	MIMAT0003885
hsa-mir-454-3p	TROVE2	6738	MIMAT0003885
hsa-mir-454-3p	SSTR2	6752	MIMAT0003885
hsa-mir-454-3p	TCF7L2	6934	MIMAT0003885
hsa-mir-454-3p	TERF2	7014	MIMAT0003885
hsa-mir-454-3p	TGFBR2	7048	MIMAT0003885
hsa-mir-454-3p	THRA	7067	MIMAT0003885
hsa-mir-454-3p	TP53	7157	MIMAT0003885
hsa-mir-454-3p	TRPC3	7222	MIMAT0003885
hsa-mir-454-3p	UBB	7314	MIMAT0003885
hsa-mir-454-3p	UBC	7316	MIMAT0003885
hsa-mir-454-3p	UBE2D2	7322	MIMAT0003885
hsa-mir-454-3p	UBE2D3	7323	MIMAT0003885
hsa-mir-454-3p	UQCRB	7381	MIMAT0003885
hsa-mir-454-3p	YY1	7528	MIMAT0003885
hsa-mir-454-3p	ZNF711	7552	MIMAT0003885
hsa-mir-454-3p	ZNF12	7559	MIMAT0003885
hsa-mir-454-3p	ZNF24	7572	MIMAT0003885
hsa-mir-454-3p	ZNF154	7710	MIMAT0003885
hsa-mir-454-3p	ZNF224	7767	MIMAT0003885
hsa-mir-454-3p	FXR1	8087	MIMAT0003885
hsa-mir-454-3p	SLC10A3	8273	MIMAT0003885
hsa-mir-454-3p	FZD6	8323	MIMAT0003885
hsa-mir-454-3p	CUL3	8452	MIMAT0003885
hsa-mir-454-3p	IFITM1	8519	MIMAT0003885
hsa-mir-454-3p	MAPKAPK5	8550	MIMAT0003885
hsa-mir-454-3p	BHLHE40	8553	MIMAT0003885
hsa-mir-454-3p	STX16	8675	MIMAT0003885
hsa-mir-454-3p	GALNT4	8693	MIMAT0003885
hsa-mir-454-3p	TNFRSF10B	8795	MIMAT0003885
hsa-mir-454-3p	USP13	8975	MIMAT0003885
hsa-mir-454-3p	WASL	8976	MIMAT0003885
hsa-mir-454-3p	ATP6V0E1	8992	MIMAT0003885
hsa-mir-454-3p	GPRC5A	9052	MIMAT0003885
hsa-mir-454-3p	MAP7	9053	MIMAT0003885
hsa-mir-454-3p	ATP6V0D1	9114	MIMAT0003885
hsa-mir-454-3p	PRPF4	9128	MIMAT0003885
hsa-mir-454-3p	DLG5	9231	MIMAT0003885
hsa-mir-454-3p	RPS6KA5	9252	MIMAT0003885
hsa-mir-454-3p	S1PR2	9294	MIMAT0003885
hsa-mir-454-3p	PPIG	9360	MIMAT0003885
hsa-mir-454-3p	ZFYVE9	9372	MIMAT0003885
hsa-mir-454-3p	QKI	9444	MIMAT0003885
hsa-mir-454-3p	SECISBP2L	9728	MIMAT0003885
hsa-mir-454-3p	MLEC	9761	MIMAT0003885
hsa-mir-454-3p	CEP170	9859	MIMAT0003885
hsa-mir-454-3p	FIG4	9896	MIMAT0003885
hsa-mir-454-3p	KLHL21	9903	MIMAT0003885
hsa-mir-454-3p	NCAPD2	9918	MIMAT0003885
hsa-mir-454-3p	SEC16A	9919	MIMAT0003885
hsa-mir-454-3p	MED12	9968	MIMAT0003885
hsa-mir-454-3p	TSPAN3	10099	MIMAT0003885
hsa-mir-454-3p	STX6	10228	MIMAT0003885
hsa-mir-454-3p	POP7	10248	MIMAT0003885
hsa-mir-454-3p	CDK2AP2	10263	MIMAT0003885
hsa-mir-454-3p	SF3A1	10291	MIMAT0003885
hsa-mir-454-3p	DLC1	10395	MIMAT0003885
hsa-mir-454-3p	ZBTB18	10472	MIMAT0003885
hsa-mir-454-3p	SEC23B	10483	MIMAT0003885
hsa-mir-454-3p	CHERP	10523	MIMAT0003885
hsa-mir-454-3p	TXNIP	10628	MIMAT0003885
hsa-mir-454-3p	LEFTY1	10637	MIMAT0003885
hsa-mir-454-3p	SLC12A7	10723	MIMAT0003885
hsa-mir-454-3p	BLCAP	10904	MIMAT0003885
hsa-mir-454-3p	GPR75	10936	MIMAT0003885
hsa-mir-454-3p	KDELR1	10945	MIMAT0003885
hsa-mir-454-3p	SERINC3	10955	MIMAT0003885
hsa-mir-454-3p	PNRC1	10957	MIMAT0003885
hsa-mir-454-3p	LILRA2	11027	MIMAT0003885
hsa-mir-454-3p	FGFR1OP	11116	MIMAT0003885
hsa-mir-454-3p	CHEK2	11200	MIMAT0003885
hsa-mir-454-3p	STK38	11329	MIMAT0003885
hsa-mir-454-3p	PPP6R1	22870	MIMAT0003885
hsa-mir-454-3p	ENPP4	22875	MIMAT0003885
hsa-mir-454-3p	BTBD3	22903	MIMAT0003885
hsa-mir-454-3p	MAPRE3	22924	MIMAT0003885
hsa-mir-454-3p	HABP4	22927	MIMAT0003885
hsa-mir-454-3p	ELL2	22936	MIMAT0003885
hsa-mir-454-3p	HMGXB3	22993	MIMAT0003885
hsa-mir-454-3p	CNOT1	23019	MIMAT0003885
hsa-mir-454-3p	CDK19	23097	MIMAT0003885
hsa-mir-454-3p	SPART	23111	MIMAT0003885
hsa-mir-454-3p	TNRC6B	23112	MIMAT0003885
hsa-mir-454-3p	POGZ	23126	MIMAT0003885
hsa-mir-454-3p	ARL6IP1	23204	MIMAT0003885
hsa-mir-454-3p	FBXO28	23219	MIMAT0003885
hsa-mir-454-3p	DTX4	23220	MIMAT0003885
hsa-mir-454-3p	RPRD2	23248	MIMAT0003885
hsa-mir-454-3p	OTUD3	23252	MIMAT0003885
hsa-mir-454-3p	CAMSAP2	23271	MIMAT0003885
hsa-mir-454-3p	POFUT2	23275	MIMAT0003885
hsa-mir-454-3p	ATMIN	23300	MIMAT0003885
hsa-mir-454-3p	SATB2	23314	MIMAT0003885
hsa-mir-454-3p	SIK3	23387	MIMAT0003885
hsa-mir-454-3p	DICER1	23405	MIMAT0003885
hsa-mir-454-3p	GPR161	23432	MIMAT0003885
hsa-mir-454-3p	ZFYVE26	23503	MIMAT0003885
hsa-mir-454-3p	SNAPIN	23557	MIMAT0003885
hsa-mir-454-3p	UBBP4	23666	MIMAT0003885
hsa-mir-454-3p	TMEM2	23670	MIMAT0003885
hsa-mir-454-3p	CBY1	25776	MIMAT0003885
hsa-mir-454-3p	SUN2	25777	MIMAT0003885
hsa-mir-454-3p	DSTYK	25778	MIMAT0003885
hsa-mir-454-3p	CLIC4	25932	MIMAT0003885
hsa-mir-454-3p	LTN1	26046	MIMAT0003885
hsa-mir-454-3p	ARHGEF26	26084	MIMAT0003885
hsa-mir-454-3p	HBP1	26959	MIMAT0003885
hsa-mir-454-3p	RNF11	26994	MIMAT0003885
hsa-mir-454-3p	SNX5	27131	MIMAT0003885
hsa-mir-454-3p	SALL3	27164	MIMAT0003885
hsa-mir-454-3p	SIGLEC9	27180	MIMAT0003885
hsa-mir-454-3p	GPR82	27197	MIMAT0003885
hsa-mir-454-3p	TNRC6A	27327	MIMAT0003885
hsa-mir-454-3p	MYLIP	29116	MIMAT0003885
hsa-mir-454-3p	RACGAP1	29127	MIMAT0003885
hsa-mir-454-3p	TMOD3	29766	MIMAT0003885
hsa-mir-454-3p	PURG	29942	MIMAT0003885
hsa-mir-454-3p	NRBF2	29982	MIMAT0003885
hsa-mir-454-3p	ZBTB7B	51043	MIMAT0003885
hsa-mir-454-3p	RDH11	51109	MIMAT0003885
hsa-mir-454-3p	IER3IP1	51124	MIMAT0003885
hsa-mir-454-3p	RLIM	51132	MIMAT0003885
hsa-mir-454-3p	CERCAM	51148	MIMAT0003885
hsa-mir-454-3p	C3orf18	51161	MIMAT0003885
hsa-mir-454-3p	ACP6	51205	MIMAT0003885
hsa-mir-454-3p	PDZD11	51248	MIMAT0003885
hsa-mir-454-3p	MRPL37	51253	MIMAT0003885
hsa-mir-454-3p	ZBTB7A	51341	MIMAT0003885
hsa-mir-454-3p	NIP7	51388	MIMAT0003885
hsa-mir-454-3p	ZNF107	51427	MIMAT0003885
hsa-mir-454-3p	CINP	51550	MIMAT0003885
hsa-mir-454-3p	RAB14	51552	MIMAT0003885
hsa-mir-454-3p	CHIC1	53344	MIMAT0003885
hsa-mir-454-3p	BRWD1	54014	MIMAT0003885
hsa-mir-454-3p	SLC38A2	54407	MIMAT0003885
hsa-mir-454-3p	RBM27	54439	MIMAT0003885
hsa-mir-454-3p	TMCO1	54499	MIMAT0003885
hsa-mir-454-3p	MED18	54797	MIMAT0003885
hsa-mir-454-3p	PIGG	54872	MIMAT0003885
hsa-mir-454-3p	PXK	54899	MIMAT0003885
hsa-mir-454-3p	RNF125	54941	MIMAT0003885
hsa-mir-454-3p	CDCA4	55038	MIMAT0003885
hsa-mir-454-3p	AKIRIN2	55122	MIMAT0003885
hsa-mir-454-3p	LRRC8D	55144	MIMAT0003885
hsa-mir-454-3p	RBM23	55147	MIMAT0003885
hsa-mir-454-3p	UBR7	55148	MIMAT0003885
hsa-mir-454-3p	CEP55	55165	MIMAT0003885
hsa-mir-454-3p	C11orf57	55216	MIMAT0003885
hsa-mir-454-3p	PPP6R3	55291	MIMAT0003885
hsa-mir-454-3p	SLC35E3	55508	MIMAT0003885
hsa-mir-454-3p	DEPDC1	55635	MIMAT0003885
hsa-mir-454-3p	CHD7	55636	MIMAT0003885
hsa-mir-454-3p	MREG	55686	MIMAT0003885
hsa-mir-454-3p	ATF7IP	55729	MIMAT0003885
hsa-mir-454-3p	TMEM30A	55754	MIMAT0003885
hsa-mir-454-3p	MBNL3	55796	MIMAT0003885
hsa-mir-454-3p	ERBIN	55914	MIMAT0003885
hsa-mir-454-3p	MFF	56947	MIMAT0003885
hsa-mir-454-3p	KIAA1191	57179	MIMAT0003885
hsa-mir-454-3p	ANKRD50	57182	MIMAT0003885
hsa-mir-454-3p	CYP20A1	57404	MIMAT0003885
hsa-mir-454-3p	MAVS	57506	MIMAT0003885
hsa-mir-454-3p	PDP2	57546	MIMAT0003885
hsa-mir-454-3p	TAOK1	57551	MIMAT0003885
hsa-mir-454-3p	BAHCC1	57597	MIMAT0003885
hsa-mir-454-3p	PHF12	57649	MIMAT0003885
hsa-mir-454-3p	ZBTB4	57659	MIMAT0003885
hsa-mir-454-3p	ZNF317	57693	MIMAT0003885
hsa-mir-454-3p	ZNF529	57711	MIMAT0003885
hsa-mir-454-3p	RAP2C	57826	MIMAT0003885
hsa-mir-454-3p	MID1IP1	58526	MIMAT0003885
hsa-mir-454-3p	RRAGD	58528	MIMAT0003885
hsa-mir-454-3p	ENPP5	59084	MIMAT0003885
hsa-mir-454-3p	MRPS35	60488	MIMAT0003885
hsa-mir-454-3p	FAM217B	63939	MIMAT0003885
hsa-mir-454-3p	KIF13A	63971	MIMAT0003885
hsa-mir-454-3p	SMOC1	64093	MIMAT0003885
hsa-mir-454-3p	ABCG8	64241	MIMAT0003885
hsa-mir-454-3p	ZMAT3	64393	MIMAT0003885
hsa-mir-454-3p	NOM1	64434	MIMAT0003885
hsa-mir-454-3p	NABP1	64859	MIMAT0003885
hsa-mir-454-3p	RFX7	64864	MIMAT0003885
hsa-mir-454-3p	WNK3	65267	MIMAT0003885
hsa-mir-454-3p	CAPRIN2	65981	MIMAT0003885
hsa-mir-454-3p	GID4	79018	MIMAT0003885
hsa-mir-454-3p	PRRG4	79056	MIMAT0003885
hsa-mir-454-3p	GNPTAB	79158	MIMAT0003885
hsa-mir-454-3p	NKAP	79576	MIMAT0003885
hsa-mir-454-3p	PLEKHF2	79666	MIMAT0003885
hsa-mir-454-3p	VPS37B	79720	MIMAT0003885
hsa-mir-454-3p	KLHL36	79786	MIMAT0003885
hsa-mir-454-3p	CSPP1	79848	MIMAT0003885
hsa-mir-454-3p	ADM2	79924	MIMAT0003885
hsa-mir-454-3p	PLEKHS1	79949	MIMAT0003885
hsa-mir-454-3p	NAA50	80218	MIMAT0003885
hsa-mir-454-3p	RAB11FIP1	80223	MIMAT0003885
hsa-mir-454-3p	CXorf21	80231	MIMAT0003885
hsa-mir-454-3p	C16orf70	80262	MIMAT0003885
hsa-mir-454-3p	KLHL15	80311	MIMAT0003885
hsa-mir-454-3p	TET1	80312	MIMAT0003885
hsa-mir-454-3p	PDRG1	81572	MIMAT0003885
hsa-mir-454-3p	PLA2G12A	81579	MIMAT0003885
hsa-mir-454-3p	CDADC1	81602	MIMAT0003885
hsa-mir-454-3p	PPP1R14C	81706	MIMAT0003885
hsa-mir-454-3p	TMTC1	83857	MIMAT0003885
hsa-mir-454-3p	RAB34	83871	MIMAT0003885
hsa-mir-454-3p	KCTD10	83892	MIMAT0003885
hsa-mir-454-3p	KREMEN1	83999	MIMAT0003885
hsa-mir-454-3p	RPF2	84154	MIMAT0003885
hsa-mir-454-3p	POLR1B	84172	MIMAT0003885
hsa-mir-454-3p	LZIC	84328	MIMAT0003885
hsa-mir-454-3p	MSANTD4	84437	MIMAT0003885
hsa-mir-454-3p	USP32	84669	MIMAT0003885
hsa-mir-454-3p	MIGA2	84895	MIMAT0003885
hsa-mir-454-3p	PPP1R15B	84919	MIMAT0003885
hsa-mir-454-3p	MASTL	84930	MIMAT0003885
hsa-mir-454-3p	PRPF38A	84950	MIMAT0003885
hsa-mir-454-3p	ZIC5	85416	MIMAT0003885
hsa-mir-454-3p	TRIM4	89122	MIMAT0003885
hsa-mir-454-3p	LMLN	89782	MIMAT0003885
hsa-mir-454-3p	KBTBD6	89890	MIMAT0003885
hsa-mir-454-3p	C16orf45	89927	MIMAT0003885
hsa-mir-454-3p	STARD13	90627	MIMAT0003885
hsa-mir-454-3p	BTF3L4	91408	MIMAT0003885
hsa-mir-454-3p	ACBD5	91452	MIMAT0003885
hsa-mir-454-3p	RFT1	91869	MIMAT0003885
hsa-mir-454-3p	ASB16	92591	MIMAT0003885
hsa-mir-454-3p	TIMM50	92609	MIMAT0003885
hsa-mir-454-3p	FAM114A1	92689	MIMAT0003885
hsa-mir-454-3p	MMGT1	93380	MIMAT0003885
hsa-mir-454-3p	ARHGAP12	94134	MIMAT0003885
hsa-mir-454-3p	FOXQ1	94234	MIMAT0003885
hsa-mir-454-3p	EGLN3	112399	MIMAT0003885
hsa-mir-454-3p	MED8	112950	MIMAT0003885
hsa-mir-454-3p	SLC46A1	113235	MIMAT0003885
hsa-mir-454-3p	FLYWCH2	114984	MIMAT0003885
hsa-mir-454-3p	WDR31	114987	MIMAT0003885
hsa-mir-454-3p	KCTD12	115207	MIMAT0003885
hsa-mir-454-3p	NUS1	116150	MIMAT0003885
hsa-mir-454-3p	COX20	116228	MIMAT0003885
hsa-mir-454-3p	ZNF354B	117608	MIMAT0003885
hsa-mir-454-3p	ANKRD9	122416	MIMAT0003885
hsa-mir-454-3p	MRPL52	122704	MIMAT0003885
hsa-mir-454-3p	NIPA1	123606	MIMAT0003885
hsa-mir-454-3p	DCUN1D3	123879	MIMAT0003885
hsa-mir-454-3p	CYB5D1	124637	MIMAT0003885
hsa-mir-454-3p	TRIM71	131405	MIMAT0003885
hsa-mir-454-3p	DCBLD2	131566	MIMAT0003885
hsa-mir-454-3p	C4orf36	132989	MIMAT0003885
hsa-mir-454-3p	JMY	133746	MIMAT0003885
hsa-mir-454-3p	MTPN	136319	MIMAT0003885
hsa-mir-454-3p	VPS37A	137492	MIMAT0003885
hsa-mir-454-3p	NACC2	138151	MIMAT0003885
hsa-mir-454-3p	ROMO1	140823	MIMAT0003885
hsa-mir-454-3p	SAMD8	142891	MIMAT0003885
hsa-mir-454-3p	PTGR2	145482	MIMAT0003885
hsa-mir-454-3p	ODF4	146852	MIMAT0003885
hsa-mir-454-3p	RUNDC1	146923	MIMAT0003885
hsa-mir-454-3p	WIPF2	147179	MIMAT0003885
hsa-mir-454-3p	ZNF417	147687	MIMAT0003885
hsa-mir-454-3p	IL23R	149233	MIMAT0003885
hsa-mir-454-3p	SIK1	150094	MIMAT0003885
hsa-mir-454-3p	DUSP18	150290	MIMAT0003885
hsa-mir-454-3p	MB21D2	151963	MIMAT0003885
hsa-mir-454-3p	THAP6	152815	MIMAT0003885
hsa-mir-454-3p	SLC38A9	153129	MIMAT0003885
hsa-mir-454-3p	FAM120AOS	158293	MIMAT0003885
hsa-mir-454-3p	PRUNE2	158471	MIMAT0003885
hsa-mir-454-3p	IFNLR1	163702	MIMAT0003885
hsa-mir-454-3p	PAPD4	167153	MIMAT0003885
hsa-mir-454-3p	ZNF800	168850	MIMAT0003885
hsa-mir-454-3p	FUT11	170384	MIMAT0003885
hsa-mir-454-3p	ZNF431	170959	MIMAT0003885
hsa-mir-454-3p	SPTSSA	171546	MIMAT0003885
hsa-mir-454-3p	AGO3	192669	MIMAT0003885
hsa-mir-454-3p	IPMK	253430	MIMAT0003885
hsa-mir-454-3p	LCLAT1	253558	MIMAT0003885
hsa-mir-454-3p	ZNF620	253639	MIMAT0003885
hsa-mir-454-3p	UBN2	254048	MIMAT0003885
hsa-mir-454-3p	RBM20	282996	MIMAT0003885
hsa-mir-454-3p	RNF149	284996	MIMAT0003885
hsa-mir-454-3p	EOGT	285203	MIMAT0003885
hsa-mir-454-3p	METTL2A	339175	MIMAT0003885
hsa-mir-454-3p	CCDC137	339230	MIMAT0003885
hsa-mir-454-3p	ZNF678	339500	MIMAT0003885
hsa-mir-454-3p	SMTNL2	342527	MIMAT0003885
hsa-mir-454-3p	RBM43	375287	MIMAT0003885
hsa-mir-454-3p	C6orf120	387263	MIMAT0003885
hsa-mir-454-3p	CLEC12B	387837	MIMAT0003885
hsa-mir-454-3p	ZNF805	390980	MIMAT0003885
hsa-mir-454-3p	ZBTB8A	653121	MIMAT0003885
hsa-mir-454-3p	SFTPA1	653509	MIMAT0003885
hsa-mir-454-3p	SLC35E2B	728661	MIMAT0003885
hsa-mir-454-3p	PRR23A	729627	MIMAT0003885
hsa-mir-454-3p	ARL17B	100506084	MIMAT0003885
hsa-mir-454-3p	POC1B-GALNT4	100528030	MIMAT0003885
hsa-mir-454-3p	ARHGAP1	392	MIMAT0003885
hsa-mir-454-3p	ATP6V1B2	526	MIMAT0003885
hsa-mir-454-3p	BTG1	694	MIMAT0003885
hsa-mir-454-3p	CALM2	805	MIMAT0003885
hsa-mir-454-3p	TPP1	1200	MIMAT0003885
hsa-mir-454-3p	DDX6	1656	MIMAT0003885
hsa-mir-454-3p	EDN1	1906	MIMAT0003885
hsa-mir-454-3p	ACSL4	2182	MIMAT0003885
hsa-mir-454-3p	FKTN	2218	MIMAT0003885
hsa-mir-454-3p	GMFB	2764	MIMAT0003885
hsa-mir-454-3p	GP2	2813	MIMAT0003885
hsa-mir-454-3p	HADHB	3032	MIMAT0003885
hsa-mir-454-3p	HOXA5	3202	MIMAT0003885
hsa-mir-454-3p	HOXB3	3213	MIMAT0003885
hsa-mir-454-3p	HPRT1	3251	MIMAT0003885
hsa-mir-454-3p	HSPA8	3312	MIMAT0003885
hsa-mir-454-3p	IGFBP5	3488	MIMAT0003885
hsa-mir-454-3p	IRF1	3659	MIMAT0003885
hsa-mir-454-3p	JARID2	3720	MIMAT0003885
hsa-mir-454-3p	LDLR	3949	MIMAT0003885
hsa-mir-454-3p	LIPA	3988	MIMAT0003885
hsa-mir-454-3p	SMAD4	4089	MIMAT0003885
hsa-mir-454-3p	MBNL1	4154	MIMAT0003885
hsa-mir-454-3p	MAP3K9	4293	MIMAT0003885
hsa-mir-454-3p	CNOT4	4850	MIMAT0003885
hsa-mir-454-3p	NPTX1	4884	MIMAT0003885
hsa-mir-454-3p	OSBP	5007	MIMAT0003885
hsa-mir-454-3p	PRKAA1	5562	MIMAT0003885
hsa-mir-454-3p	RAB5B	5869	MIMAT0003885
hsa-mir-454-3p	RAN	5901	MIMAT0003885
hsa-mir-454-3p	CLIP1	6249	MIMAT0003885
hsa-mir-454-3p	MSMO1	6307	MIMAT0003885
hsa-mir-454-3p	CXCL12	6387	MIMAT0003885
hsa-mir-454-3p	SOX4	6659	MIMAT0003885
hsa-mir-454-3p	UBB	7314	MIMAT0003885
hsa-mir-454-3p	UBC	7316	MIMAT0003885
hsa-mir-454-3p	UQCRB	7381	MIMAT0003885
hsa-mir-454-3p	ZNF12	7559	MIMAT0003885
hsa-mir-454-3p	ZNF24	7572	MIMAT0003885
hsa-mir-454-3p	ZNF224	7767	MIMAT0003885
hsa-mir-454-3p	FXR1	8087	MIMAT0003885
hsa-mir-454-3p	FZD6	8323	MIMAT0003885
hsa-mir-454-3p	CUL3	8452	MIMAT0003885
hsa-mir-454-3p	BHLHE40	8553	MIMAT0003885
hsa-mir-454-3p	ATP6V0E1	8992	MIMAT0003885
hsa-mir-454-3p	MAP7	9053	MIMAT0003885
hsa-mir-454-3p	ZFYVE9	9372	MIMAT0003885
hsa-mir-454-3p	QKI	9444	MIMAT0003885
hsa-mir-454-3p	SECISBP2L	9728	MIMAT0003885
hsa-mir-454-3p	TSPAN3	10099	MIMAT0003885
hsa-mir-454-3p	STX6	10228	MIMAT0003885
hsa-mir-454-3p	POP7	10248	MIMAT0003885
hsa-mir-454-3p	SEC23B	10483	MIMAT0003885
hsa-mir-454-3p	CHERP	10523	MIMAT0003885
hsa-mir-454-3p	TXNIP	10628	MIMAT0003885
hsa-mir-454-3p	BLCAP	10904	MIMAT0003885
hsa-mir-454-3p	SERINC3	10955	MIMAT0003885
hsa-mir-454-3p	STK38	11329	MIMAT0003885
hsa-mir-454-3p	PPP6R1	22870	MIMAT0003885
hsa-mir-454-3p	BTBD3	22903	MIMAT0003885
hsa-mir-454-3p	CNOT1	23019	MIMAT0003885
hsa-mir-454-3p	TNRC6B	23112	MIMAT0003885
hsa-mir-454-3p	ARL6IP1	23204	MIMAT0003885
hsa-mir-454-3p	FBXO28	23219	MIMAT0003885
hsa-mir-454-3p	OTUD3	23252	MIMAT0003885
hsa-mir-454-3p	DICER1	23405	MIMAT0003885
hsa-mir-454-3p	SNAPIN	23557	MIMAT0003885
hsa-mir-454-3p	CBY1	25776	MIMAT0003885
hsa-mir-454-3p	CLIC4	25932	MIMAT0003885
hsa-mir-454-3p	LTN1	26046	MIMAT0003885
hsa-mir-454-3p	ARHGEF26	26084	MIMAT0003885
hsa-mir-454-3p	HBP1	26959	MIMAT0003885
hsa-mir-454-3p	RNF11	26994	MIMAT0003885
hsa-mir-454-3p	SNX5	27131	MIMAT0003885
hsa-mir-454-3p	TNRC6A	27327	MIMAT0003885
hsa-mir-454-3p	TMOD3	29766	MIMAT0003885
hsa-mir-454-3p	ZBTB7B	51043	MIMAT0003885
hsa-mir-454-3p	RDH11	51109	MIMAT0003885
hsa-mir-454-3p	RLIM	51132	MIMAT0003885
hsa-mir-454-3p	PDZD11	51248	MIMAT0003885
hsa-mir-454-3p	MRPL37	51253	MIMAT0003885
hsa-mir-454-3p	ZBTB7A	51341	MIMAT0003885
hsa-mir-454-3p	RAB14	51552	MIMAT0003885
hsa-mir-454-3p	BRWD1	54014	MIMAT0003885
hsa-mir-454-3p	SLC38A2	54407	MIMAT0003885
hsa-mir-454-3p	PXK	54899	MIMAT0003885
hsa-mir-454-3p	AKIRIN2	55122	MIMAT0003885
hsa-mir-454-3p	UBR7	55148	MIMAT0003885
hsa-mir-454-3p	DEPDC1	55635	MIMAT0003885
hsa-mir-454-3p	MREG	55686	MIMAT0003885
hsa-mir-454-3p	TMEM30A	55754	MIMAT0003885
hsa-mir-454-3p	MBNL3	55796	MIMAT0003885
hsa-mir-454-3p	ANKRD50	57182	MIMAT0003885
hsa-mir-454-3p	TAOK1	57551	MIMAT0003885
hsa-mir-454-3p	ZBTB4	57659	MIMAT0003885
hsa-mir-454-3p	RAP2C	57826	MIMAT0003885
hsa-mir-454-3p	RRAGD	58528	MIMAT0003885
hsa-mir-454-3p	ENPP5	59084	MIMAT0003885
hsa-mir-454-3p	ZMAT3	64393	MIMAT0003885
hsa-mir-454-3p	NABP1	64859	MIMAT0003885
hsa-mir-454-3p	RFX7	64864	MIMAT0003885
hsa-mir-454-3p	PLEKHF2	79666	MIMAT0003885
hsa-mir-454-3p	C16orf70	80262	MIMAT0003885
hsa-mir-454-3p	KLHL15	80311	MIMAT0003885
hsa-mir-454-3p	PDRG1	81572	MIMAT0003885
hsa-mir-454-3p	KCTD10	83892	MIMAT0003885
hsa-mir-454-3p	PPP1R15B	84919	MIMAT0003885
hsa-mir-454-3p	BTF3L4	91408	MIMAT0003885
hsa-mir-454-3p	ACBD5	91452	MIMAT0003885
hsa-mir-454-3p	DCUN1D3	123879	MIMAT0003885
hsa-mir-454-3p	JMY	133746	MIMAT0003885
hsa-mir-454-3p	VPS37A	137492	MIMAT0003885
hsa-mir-454-3p	NACC2	138151	MIMAT0003885
hsa-mir-454-3p	SAMD8	142891	MIMAT0003885
hsa-mir-454-3p	RUNDC1	146923	MIMAT0003885
hsa-mir-454-3p	WIPF2	147179	MIMAT0003885
hsa-mir-454-3p	MB21D2	151963	MIMAT0003885
hsa-mir-454-3p	PRUNE2	158471	MIMAT0003885
hsa-mir-454-3p	ZNF800	168850	MIMAT0003885
hsa-mir-454-3p	ZNF431	170959	MIMAT0003885
hsa-mir-454-3p	SPTSSA	171546	MIMAT0003885
hsa-mir-454-3p	LCLAT1	253558	MIMAT0003885
hsa-mir-454-3p	EOGT	285203	MIMAT0003885
hsa-mir-454-3p	CCDC137	339230	MIMAT0003885
hsa-mir-454-3p	ZNF678	339500	MIMAT0003885
hsa-mir-454-3p	ANKIB1	54467	MIMAT0003885
hsa-mir-454-3p	KRIT1	889	MIMAT0003885
hsa-mir-454-3p	KRIT1	889	MIMAT0003885
hsa-mir-454-3p	M6PR	4074	MIMAT0003885
hsa-mir-454-3p	SKAP2	8935	MIMAT0003885
hsa-mir-454-3p	KIAA0100	9703	MIMAT0003885
hsa-mir-454-3p	UBE3C	9690	MIMAT0003885
hsa-mir-454-3p	MAP4K5	11183	MIMAT0003885
hsa-mir-454-3p	CAPN1	823	MIMAT0003885
hsa-mir-454-3p	ATP2C1	27032	MIMAT0003885
hsa-mir-454-3p	RUNX3	864	MIMAT0003885
hsa-mir-454-3p	CPS1	1373	MIMAT0003885
hsa-mir-454-3p	ERP44	23071	MIMAT0003885
hsa-mir-454-3p	AKAP11	11215	MIMAT0003885
hsa-mir-454-3p	PHF20	51230	MIMAT0003885
hsa-mir-454-3p	VEZT	55591	MIMAT0003885
hsa-mir-454-3p	TBPL1	9519	MIMAT0003885
hsa-mir-454-3p	TIMP2	7077	MIMAT0003885
hsa-mir-454-3p	MAT2B	27430	MIMAT0003885
hsa-mir-454-3p	TRIO	7204	MIMAT0003885
hsa-mir-454-3p	MED17	9440	MIMAT0003885
hsa-mir-454-3p	ARAP2	116984	MIMAT0003885
hsa-mir-454-3p	VPS13D	55187	MIMAT0003885
hsa-mir-454-3p	FAM120A	23196	MIMAT0003885
hsa-mir-454-3p	VAMP3	9341	MIMAT0003885
hsa-mir-454-3p	HERPUD1	9709	MIMAT0003885
hsa-mir-454-3p	PIK3CB	5291	MIMAT0003885
hsa-mir-454-3p	ARID4B	51742	MIMAT0003885
hsa-mir-454-3p	PLEKHH1	57475	MIMAT0003885
hsa-mir-454-3p	KMT2C	58508	MIMAT0003885
hsa-mir-454-3p	RC3H2	54542	MIMAT0003885
hsa-mir-454-3p	ATP11B	23200	MIMAT0003885
hsa-mir-454-3p	CTDP1	9150	MIMAT0003885
hsa-mir-454-3p	CTDP1	9150	MIMAT0003885
hsa-mir-454-3p	WNK1	65125	MIMAT0003885
hsa-mir-454-3p	QSER1	79832	MIMAT0003885
hsa-mir-454-3p	BCAT1	586	MIMAT0003885
hsa-mir-454-3p	NCKAP1	10787	MIMAT0003885
hsa-mir-454-3p	GPBP1	65056	MIMAT0003885
hsa-mir-454-3p	ZNF275	10838	MIMAT0003885
hsa-mir-454-3p	RNF4	6047	MIMAT0003885
hsa-mir-454-3p	ST3GAL6	10402	MIMAT0003885
hsa-mir-454-3p	HIPK2	28996	MIMAT0003885
hsa-mir-454-3p	MTHFD2	10797	MIMAT0003885
hsa-mir-454-3p	NFYC	4802	MIMAT0003885
hsa-mir-454-3p	ASPM	259266	MIMAT0003885
hsa-mir-454-3p	ATXN3	4287	MIMAT0003885
hsa-mir-454-3p	ZFAT	57623	MIMAT0003885
hsa-mir-454-3p	DDX3Y	8653	MIMAT0003885
hsa-mir-454-3p	NEO1	4756	MIMAT0003885
hsa-mir-454-3p	CBFB	865	MIMAT0003885
hsa-mir-454-3p	ATP11A	23250	MIMAT0003885
hsa-mir-454-3p	NUCKS1	64710	MIMAT0003885
hsa-mir-454-3p	VPS35	55737	MIMAT0003885
hsa-mir-454-3p	TGFBR3	7049	MIMAT0003885
hsa-mir-454-3p	MAPK6	5597	MIMAT0003885
hsa-mir-454-3p	LRP6	4040	MIMAT0003885
hsa-mir-454-3p	LRP6	4040	MIMAT0003885
hsa-mir-454-3p	EXOC5	10640	MIMAT0003885
hsa-mir-454-3p	MGAT4A	11320	MIMAT0003885
hsa-mir-454-3p	WDR1	9948	MIMAT0003885
hsa-mir-454-3p	SCARB1	949	MIMAT0003885
hsa-mir-454-3p	PDE8A	5151	MIMAT0003885
hsa-mir-454-3p	CA12	771	MIMAT0003885
hsa-mir-454-3p	DPP8	54878	MIMAT0003885
hsa-mir-454-3p	EIF4G3	8672	MIMAT0003885
hsa-mir-454-3p	GRAMD4	23151	MIMAT0003885
hsa-mir-454-3p	SLC25A3	5250	MIMAT0003885
hsa-mir-454-3p	FOSL2	2355	MIMAT0003885
hsa-mir-454-3p	KLHL20	27252	MIMAT0003885
hsa-mir-454-3p	JADE1	79960	MIMAT0003885
hsa-mir-454-3p	UBE2K	3093	MIMAT0003885
hsa-mir-454-3p	MLLT10	8028	MIMAT0003885
hsa-mir-454-3p	TNS1	7145	MIMAT0003885
hsa-mir-454-3p	DNM2	1785	MIMAT0003885
hsa-mir-454-3p	CLDND1	56650	MIMAT0003885
hsa-mir-454-3p	PCNP	57092	MIMAT0003885
hsa-mir-454-3p	CADPS2	93664	MIMAT0003885
hsa-mir-454-3p	FAM135A	57579	MIMAT0003885
hsa-mir-454-3p	ULK2	9706	MIMAT0003885
hsa-mir-454-3p	TNPO1	3842	MIMAT0003885
hsa-mir-454-3p	EIF3I	8668	MIMAT0003885
hsa-mir-454-3p	RAB10	10890	MIMAT0003885
hsa-mir-454-3p	HADHA	3030	MIMAT0003885
hsa-mir-454-3p	WDR47	22911	MIMAT0003885
hsa-mir-454-3p	ATG16L1	55054	MIMAT0003885
hsa-mir-454-3p	ATG16L1	55054	MIMAT0003885
hsa-mir-454-3p	DNAJA1	3301	MIMAT0003885
hsa-mir-454-3p	NFX1	4799	MIMAT0003885
hsa-mir-454-3p	EIF2AK1	27102	MIMAT0003885
hsa-mir-454-3p	HUWE1	10075	MIMAT0003885
hsa-mir-454-3p	PIGS	94005	MIMAT0003885
hsa-mir-454-3p	CRLS1	54675	MIMAT0003885
hsa-mir-454-3p	PAPOLA	10914	MIMAT0003885
hsa-mir-454-3p	ZNF268	10795	MIMAT0003885
hsa-mir-454-3p	OSBPL8	114882	MIMAT0003885
hsa-mir-454-3p	CDV3	55573	MIMAT0003885
hsa-mir-454-3p	SUPT16H	11198	MIMAT0003885
hsa-mir-454-3p	TRPM7	54822	MIMAT0003885
hsa-mir-454-3p	BAMBI	25805	MIMAT0003885
hsa-mir-454-3p	WAC	51322	MIMAT0003885
hsa-mir-454-3p	CDC5L	988	MIMAT0003885
hsa-mir-454-3p	CDC7	8317	MIMAT0003885
hsa-mir-454-3p	NRP1	8829	MIMAT0003885
hsa-mir-454-3p	CCDC134	79879	MIMAT0003885
hsa-mir-454-3p	DDX17	10521	MIMAT0003885
hsa-mir-454-3p	ZBED4	9889	MIMAT0003885
hsa-mir-454-3p	DAAM1	23002	MIMAT0003885
hsa-mir-454-3p	ITPK1	3705	MIMAT0003885
hsa-mir-454-3p	ITPK1	3705	MIMAT0003885
hsa-mir-454-3p	PABPN1	8106	MIMAT0003885
hsa-mir-454-3p	STK4	6789	MIMAT0003885
hsa-mir-454-3p	ADNP	23394	MIMAT0003885
hsa-mir-454-3p	MANBAL	63905	MIMAT0003885
hsa-mir-454-3p	MAPRE1	22919	MIMAT0003885
hsa-mir-454-3p	E2F1	1869	MIMAT0003885
hsa-mir-454-3p	FAM83D	81610	MIMAT0003885
hsa-mir-454-3p	RBBP8	5932	MIMAT0003885
hsa-mir-454-3p	ALG13	79868	MIMAT0003885
hsa-mir-454-3p	AMMECR1	9949	MIMAT0003885
hsa-mir-454-3p	ATP11C	286410	MIMAT0003885
hsa-mir-454-3p	FMR1	2332	MIMAT0003885
hsa-mir-454-3p	FNDC3A	22862	MIMAT0003885
hsa-mir-454-3p	DGKH	160851	MIMAT0003885
hsa-mir-454-3p	TSC22D1	8848	MIMAT0003885
hsa-mir-454-3p	LONP2	83752	MIMAT0003885
hsa-mir-454-3p	N4BP1	9683	MIMAT0003885
hsa-mir-454-3p	USP31	57478	MIMAT0003885
hsa-mir-454-3p	UBE2W	55284	MIMAT0003885
hsa-mir-454-3p	UBR5	51366	MIMAT0003885
hsa-mir-454-3p	MTMR9	66036	MIMAT0003885
hsa-mir-454-3p	MTMR9	66036	MIMAT0003885
hsa-mir-454-3p	ASF1B	55723	MIMAT0003885
hsa-mir-454-3p	ASF1B	55723	MIMAT0003885
hsa-mir-454-3p	MYH14	79784	MIMAT0003885
hsa-mir-454-3p	PIK3R2	5296	MIMAT0003885
hsa-mir-454-3p	AVL9	23080	MIMAT0003885
hsa-mir-454-3p	ITGB8	3696	MIMAT0003885
hsa-mir-454-3p	CAV2	858	MIMAT0003885
hsa-mir-454-3p	MET	4233	MIMAT0003885
hsa-mir-454-3p	LMBR1	64327	MIMAT0003885
hsa-mir-454-3p	IMPDH1	3614	MIMAT0003885
hsa-mir-454-3p	URGCP	55665	MIMAT0003885
hsa-mir-454-3p	FSD1L	83856	MIMAT0003885
hsa-mir-454-3p	TBC1D13	54662	MIMAT0003885
hsa-mir-454-3p	TNKS2	80351	MIMAT0003885
hsa-mir-454-3p	CPEB3	22849	MIMAT0003885
hsa-mir-454-3p	LARP4B	23185	MIMAT0003885
hsa-mir-454-3p	NUFIP2	57532	MIMAT0003885
hsa-mir-454-3p	MTMR4	9110	MIMAT0003885
hsa-mir-454-3p	SMARCD2	6603	MIMAT0003885
hsa-mir-454-3p	DDX5	1655	MIMAT0003885
hsa-mir-454-3p	LUC7L3	51747	MIMAT0003885
hsa-mir-454-3p	TBC1D9	23158	MIMAT0003885
hsa-mir-454-3p	KLF3	51274	MIMAT0003885
hsa-mir-454-3p	UGDH	7358	MIMAT0003885
hsa-mir-454-3p	DCPS	28960	MIMAT0003885
hsa-mir-454-3p	EIF4G2	1982	MIMAT0003885
hsa-mir-454-3p	UBE4A	9354	MIMAT0003885
hsa-mir-454-3p	HIPK3	10114	MIMAT0003885
hsa-mir-454-3p	SLC1A2	6506	MIMAT0003885
hsa-mir-454-3p	PRDM4	11108	MIMAT0003885
hsa-mir-454-3p	NAA25	80018	MIMAT0003885
hsa-mir-454-3p	OAS3	4940	MIMAT0003885
hsa-mir-454-3p	CAND1	55832	MIMAT0003885
hsa-mir-454-3p	LDHB	3945	MIMAT0003885
hsa-mir-454-3p	HCFC2	29915	MIMAT0003885
hsa-mir-454-3p	C2CD5	9847	MIMAT0003885
hsa-mir-454-3p	RNGTT	8732	MIMAT0003885
hsa-mir-454-3p	KCTD20	222658	MIMAT0003885
hsa-mir-454-3p	ICK	22858	MIMAT0003885
hsa-mir-454-3p	ZNF451	26036	MIMAT0003885
hsa-mir-454-3p	PTP4A1	7803	MIMAT0003885
hsa-mir-454-3p	C6orf62	81688	MIMAT0003885
hsa-mir-454-3p	SOBP	55084	MIMAT0003885
hsa-mir-454-3p	CUTA	51596	MIMAT0003885
hsa-mir-454-3p	CUTA	51596	MIMAT0003885
hsa-mir-454-3p	HMGCS1	3157	MIMAT0003885
hsa-mir-454-3p	CNOT6	57472	MIMAT0003885
hsa-mir-454-3p	TRIM23	373	MIMAT0003885
hsa-mir-454-3p	SMAD5	4090	MIMAT0003885
hsa-mir-454-3p	CSNK1A1	1452	MIMAT0003885
hsa-mir-454-3p	STC2	8614	MIMAT0003885
hsa-mir-454-3p	CPEB4	80315	MIMAT0003885
hsa-mir-454-3p	SMC4	10051	MIMAT0003885
hsa-mir-454-3p	SLC41A3	54946	MIMAT0003885
hsa-mir-454-3p	ACVR2B	93	MIMAT0003885
hsa-mir-454-3p	PIKFYVE	200576	MIMAT0003885
hsa-mir-454-3p	TANC1	85461	MIMAT0003885
hsa-mir-454-3p	KDM3A	55818	MIMAT0003885
hsa-mir-454-3p	CHMP3	51652	MIMAT0003885
hsa-mir-454-3p	SLC9A2	6549	MIMAT0003885
hsa-mir-454-3p	BIRC6	57448	MIMAT0003885
hsa-mir-454-3p	SUMO1	7341	MIMAT0003885
hsa-mir-454-3p	EPHA4	2043	MIMAT0003885
hsa-mir-454-3p	SCP2	6342	MIMAT0003885
hsa-mir-454-3p	ASH1L	55870	MIMAT0003885
hsa-mir-454-3p	NID1	4811	MIMAT0003885
hsa-mir-454-3p	APH1A	51107	MIMAT0003885
hsa-mir-454-3p	PRDX6	9588	MIMAT0003885
hsa-mir-454-3p	RPA2	6118	MIMAT0003885
hsa-mir-454-3p	KMT2A	4297	MIMAT0003885
hsa-mir-454-3p	KIF14	9928	MIMAT0003885
hsa-mir-454-3p	KLF7	8609	MIMAT0003885
hsa-mir-454-3p	SLC16A7	9194	MIMAT0003885
hsa-mir-454-3p	FAM47E-STBD1	100631383	MIMAT0003885
hsa-mir-454-3p	RAB3GAP2	25782	MIMAT0003885
hsa-mir-454-3p	GDA	9615	MIMAT0003885
hsa-mir-454-3p	RAD23B	5887	MIMAT0003885
hsa-mir-454-3p	VPS4B	9525	MIMAT0003885
hsa-mir-454-3p	RBM25	58517	MIMAT0003885
hsa-mir-454-3p	FAM98A	25940	MIMAT0003885
hsa-mir-454-3p	LGALSL	29094	MIMAT0003885
hsa-mir-454-3p	PANK3	79646	MIMAT0003885
hsa-mir-454-3p	EPC1	80314	MIMAT0003885
hsa-mir-454-3p	TARDBP	23435	MIMAT0003885
hsa-mir-454-3p	LYPLA1	10434	MIMAT0003885
hsa-mir-454-3p	UBL3	5412	MIMAT0003885
hsa-mir-454-3p	OCRL	4952	MIMAT0003885
hsa-mir-454-3p	RBBP6	5930	MIMAT0003885
hsa-mir-454-3p	ZNF644	84146	MIMAT0003885
hsa-mir-454-3p	ZMIZ2	83637	MIMAT0003885
hsa-mir-454-3p	ARL4A	10124	MIMAT0003885
hsa-mir-454-3p	LPGAT1	9926	MIMAT0003885
hsa-mir-454-3p	G0S2	50486	MIMAT0003885
hsa-mir-454-3p	ACSL3	2181	MIMAT0003885
hsa-mir-454-3p	SDC4	6385	MIMAT0003885
hsa-mir-454-3p	VAPB	9217	MIMAT0003885
hsa-mir-454-3p	ZNFX1	57169	MIMAT0003885
hsa-mir-454-3p	PMEPA1	56937	MIMAT0003885
hsa-mir-454-3p	RNF114	55905	MIMAT0003885
hsa-mir-454-3p	CDKN1A	1026	MIMAT0003885
hsa-mir-454-3p	RREB1	6239	MIMAT0003885
hsa-mir-454-3p	SLC2A4RG	56731	MIMAT0003885
hsa-mir-454-3p	TRAP1	10131	MIMAT0003885
hsa-mir-454-3p	HELB	92797	MIMAT0003885
hsa-mir-454-3p	RAB3IP	117177	MIMAT0003885
hsa-mir-454-3p	SLC35E1	79939	MIMAT0003885
hsa-mir-454-3p	MACF1	23499	MIMAT0003885
hsa-mir-454-3p	NDUFA5	4698	MIMAT0003885
hsa-mir-454-3p	HOXD1	3231	MIMAT0003885
hsa-mir-454-3p	DUT	1854	MIMAT0003885
hsa-mir-454-3p	CLN6	54982	MIMAT0003885
hsa-mir-454-3p	MBD4	8930	MIMAT0003885
hsa-mir-454-3p	BCL2L2	599	MIMAT0003885
hsa-mir-454-3p	PHF10	55274	MIMAT0003885
hsa-mir-454-3p	SH3BP4	23677	MIMAT0003885
hsa-mir-454-3p	KIF1A	547	MIMAT0003885
hsa-mir-454-3p	TULP4	56995	MIMAT0003885
hsa-mir-454-3p	ZSWIM6	57688	MIMAT0003885
hsa-mir-454-3p	ATXN10	25814	MIMAT0003885
hsa-mir-454-3p	ZNF337	26152	MIMAT0003885
hsa-mir-454-3p	TRIM28	10155	MIMAT0003885
hsa-mir-454-3p	SESN2	83667	MIMAT0003885
hsa-mir-454-3p	SESN2	83667	MIMAT0003885
hsa-mir-454-3p	MRPS25	64432	MIMAT0003885
hsa-mir-454-3p	SLC6A6	6533	MIMAT0003885
hsa-mir-454-3p	EXOC4	60412	MIMAT0003885
hsa-mir-454-3p	DHX30	22907	MIMAT0003885
hsa-mir-454-3p	EFR3A	23167	MIMAT0003885
hsa-mir-454-3p	PTCD3	55037	MIMAT0003885
hsa-mir-454-3p	IMMT	10989	MIMAT0003885
hsa-mir-454-3p	UBE2G1	7326	MIMAT0003885
hsa-mir-454-3p	SEC61G	23480	MIMAT0003885
hsa-mir-454-3p	SNAP25	6616	MIMAT0003885
hsa-mir-454-3p	XPO4	64328	MIMAT0003885
hsa-mir-454-3p	SCO1	6341	MIMAT0003885
hsa-mir-454-3p	SLC41A1	254428	MIMAT0003885
hsa-mir-454-3p	WDR74	54663	MIMAT0003885
hsa-mir-454-3p	RTN3	10313	MIMAT0003885
hsa-mir-454-3p	SBF2	81846	MIMAT0003885
hsa-mir-454-3p	CCNB1	891	MIMAT0003885
hsa-mir-454-3p	VHL	7428	MIMAT0003885
hsa-mir-454-3p	NOTCH2	4853	MIMAT0003885
hsa-mir-454-3p	PPHLN1	51535	MIMAT0003885
hsa-mir-454-3p	IL6ST	3572	MIMAT0003885
hsa-mir-454-3p	AGO4	192670	MIMAT0003885
hsa-mir-454-3p	DSC2	1824	MIMAT0003885
hsa-mir-454-3p	NREP	9315	MIMAT0003885
hsa-mir-454-3p	NAA35	60560	MIMAT0003885
hsa-mir-454-3p	TES	26136	MIMAT0003885
hsa-mir-454-3p	MDFIC	29969	MIMAT0003885
hsa-mir-454-3p	SYNCRIP	10492	MIMAT0003885
hsa-mir-454-3p	TROAP	10024	MIMAT0003885
hsa-mir-454-3p	LAMC1	3915	MIMAT0003885
hsa-mir-454-3p	EIF4E2	9470	MIMAT0003885
hsa-mir-454-3p	EPC2	26122	MIMAT0003885
hsa-mir-454-3p	ITM2B	9445	MIMAT0003885
hsa-mir-454-3p	KDELR2	11014	MIMAT0003885
hsa-mir-454-3p	ZDHHC4	55146	MIMAT0003885
hsa-mir-454-3p	SRSF1	6426	MIMAT0003885
hsa-mir-454-3p	VEZF1	7716	MIMAT0003885
hsa-mir-454-3p	SKIL	6498	MIMAT0003885
hsa-mir-454-3p	KCTD3	51133	MIMAT0003885
hsa-mir-454-3p	ENPP2	5168	MIMAT0003885
hsa-mir-454-3p	RNF38	152006	MIMAT0003885
hsa-mir-454-3p	CPEB2	132864	MIMAT0003885
hsa-mir-454-3p	CPEB2	132864	MIMAT0003885
hsa-mir-454-3p	RDX	5962	MIMAT0003885
hsa-mir-454-3p	RAB1A	5861	MIMAT0003885
hsa-mir-454-3p	ATRAID	51374	MIMAT0003885
hsa-mir-454-3p	OLA1	29789	MIMAT0003885
hsa-mir-454-3p	UBL7	84993	MIMAT0003885
hsa-mir-454-3p	UBL7	84993	MIMAT0003885
hsa-mir-454-3p	G3BP2	9908	MIMAT0003885
hsa-mir-454-3p	CCNG2	901	MIMAT0003885
hsa-mir-454-3p	PPP3CA	5530	MIMAT0003885
hsa-mir-454-3p	FBN2	2201	MIMAT0003885
hsa-mir-454-3p	TMBIM6	7009	MIMAT0003885
hsa-mir-454-3p	ANKRD52	283373	MIMAT0003885
hsa-mir-454-3p	SLAIN1	122060	MIMAT0003885
hsa-mir-454-3p	NCOA2	10499	MIMAT0003885
hsa-mir-454-3p	IGF1R	3480	MIMAT0003885
hsa-mir-454-3p	USP3	9960	MIMAT0003885
hsa-mir-454-3p	POLG	5428	MIMAT0003885
hsa-mir-454-3p	SEC11A	23478	MIMAT0003885
hsa-mir-454-3p	CDH11	1009	MIMAT0003885
hsa-mir-454-3p	ZCCHC14	23174	MIMAT0003885
hsa-mir-454-3p	NCOR1	9611	MIMAT0003885
hsa-mir-454-3p	RPS11	6205	MIMAT0003885
hsa-mir-454-3p	KIAA0319L	79932	MIMAT0003885
hsa-mir-454-3p	MCL1	4170	MIMAT0003885
hsa-mir-454-3p	CDC42BPA	8476	MIMAT0003885
hsa-mir-454-3p	VPS54	51542	MIMAT0003885
hsa-mir-454-3p	SLC20A1	6574	MIMAT0003885
hsa-mir-454-3p	VGLL4	9686	MIMAT0003885
hsa-mir-454-3p	FEM1C	56929	MIMAT0003885
hsa-mir-454-3p	G3BP1	10146	MIMAT0003885
hsa-mir-454-3p	RNF44	22838	MIMAT0003885
hsa-mir-454-3p	CREB5	9586	MIMAT0003885
hsa-mir-454-3p	EGFR	1956	MIMAT0003885
hsa-mir-454-3p	TMEM168	64418	MIMAT0003885
hsa-mir-454-3p	MFHAS1	9258	MIMAT0003885
hsa-mir-454-3p	MFHAS1	9258	MIMAT0003885
hsa-mir-454-3p	SYBU	55638	MIMAT0003885
hsa-mir-454-3p	FBXO10	26267	MIMAT0003885
hsa-mir-454-3p	FBXO10	26267	MIMAT0003885
hsa-mir-454-3p	ZEB1	6935	MIMAT0003885
hsa-mir-454-3p	EIF4EBP2	1979	MIMAT0003885
hsa-mir-454-3p	NPAT	4863	MIMAT0003885
hsa-mir-454-3p	ALDOA	226	MIMAT0003885
hsa-mir-454-3p	HMGA2	8091	MIMAT0003885
hsa-mir-454-3p	ARID5B	84159	MIMAT0003885
hsa-mir-454-3p	ASAP2	8853	MIMAT0003885
hsa-mir-454-3p	EPG5	57724	MIMAT0003885
hsa-mir-454-3p	PSTPIP2	9050	MIMAT0003885
hsa-mir-454-3p	C18orf25	147339	MIMAT0003885
hsa-mir-454-3p	TGOLN2	10618	MIMAT0003885
hsa-mir-454-3p	UHMK1	127933	MIMAT0003885
hsa-mir-454-3p	PAN3	255967	MIMAT0003885
hsa-mir-454-3p	NADK2	133686	MIMAT0003885
hsa-mir-454-3p	SAR1B	51128	MIMAT0003885
hsa-mir-454-3p	PLOD2	5352	MIMAT0003885
hsa-mir-454-3p	BCL2L11	10018	MIMAT0003885
hsa-mir-454-3p	ASAP1	50807	MIMAT0003885
hsa-mir-454-3p	DDAH1	23576	MIMAT0003885
hsa-mir-454-3p	TBCEL	219899	MIMAT0003885
hsa-mir-454-3p	LONRF1	91694	MIMAT0003885
hsa-mir-454-3p	LONRF1	91694	MIMAT0003885
hsa-mir-454-3p	TRIM11	81559	MIMAT0003885
hsa-mir-454-3p	MIER3	166968	MIMAT0003885
hsa-mir-454-3p	KIF5A	3798	MIMAT0003885
hsa-mir-454-3p	MAPK13	5603	MIMAT0003885
hsa-mir-454-3p	BUB1B	701	MIMAT0003885
hsa-mir-454-3p	EIF5B	9669	MIMAT0003885
hsa-mir-454-3p	B4GALT5	9334	MIMAT0003885
hsa-mir-454-3p	SPATA2	9825	MIMAT0003885
hsa-mir-454-3p	STC1	6781	MIMAT0003885
hsa-mir-454-3p	AGPAT3	56894	MIMAT0003885
hsa-mir-454-3p	MAML1	9794	MIMAT0003885
hsa-mir-454-3p	MAML1	9794	MIMAT0003885
hsa-mir-454-3p	SHANK2	22941	MIMAT0003885
hsa-mir-454-3p	NFIA	4774	MIMAT0003885
hsa-mir-454-3p	AGL	178	MIMAT0003885
hsa-mir-454-3p	BROX	148362	MIMAT0003885
hsa-mir-454-3p	CNST	163882	MIMAT0003885
hsa-mir-454-3p	WDR26	80232	MIMAT0003885
hsa-mir-454-3p	SMARCAD1	56916	MIMAT0003885
hsa-mir-454-3p	FSTL1	11167	MIMAT0003885
hsa-mir-454-3p	ARPC2	10109	MIMAT0003885
hsa-mir-454-3p	CDS1	1040	MIMAT0003885
hsa-mir-454-3p	SMIM14	201895	MIMAT0003885
hsa-mir-454-3p	RPP14	11102	MIMAT0003885
hsa-mir-454-3p	RCHY1	25898	MIMAT0003885
hsa-mir-454-3p	RPN1	6184	MIMAT0003885
hsa-mir-454-3p	OTUD4	54726	MIMAT0003885
hsa-mir-454-3p	EDIL3	10085	MIMAT0003885
hsa-mir-454-3p	LMTK2	22853	MIMAT0003885
hsa-mir-454-3p	FASTK	10922	MIMAT0003885
hsa-mir-454-3p	FOXK1	221937	MIMAT0003885
hsa-mir-454-3p	TP53INP1	94241	MIMAT0003885
hsa-mir-454-3p	ZHX1	11244	MIMAT0003885
hsa-mir-454-3p	VCP	7415	MIMAT0003885
hsa-mir-454-3p	SUGT1	10910	MIMAT0003885
hsa-mir-454-3p	SKA3	221150	MIMAT0003885
hsa-mir-454-3p	TSC1	7248	MIMAT0003885
hsa-mir-454-3p	E2F7	144455	MIMAT0003885
hsa-mir-454-3p	PTER	9317	MIMAT0003885
hsa-mir-454-3p	BAG5	9529	MIMAT0003885
hsa-mir-454-3p	CUL5	8065	MIMAT0003885
hsa-mir-454-3p	MCM7	4176	MIMAT0003885
hsa-mir-454-3p	ZNF3	7551	MIMAT0003885
hsa-mir-454-3p	NDEL1	81565	MIMAT0003885
hsa-mir-454-3p	AP1G1	164	MIMAT0003885
hsa-mir-454-3p	IGF2	3481	MIMAT0003885
hsa-mir-454-3p	KMT2D	8085	MIMAT0003885
hsa-mir-454-3p	SRRM2	23524	MIMAT0003885
hsa-mir-454-3p	STAT3	6774	MIMAT0003885
hsa-mir-454-3p	TET2	54790	MIMAT0003885
hsa-mir-454-3p	TSPAN5	10098	MIMAT0003885
hsa-mir-454-3p	FSTL5	56884	MIMAT0003885
hsa-mir-454-3p	CEP120	153241	MIMAT0003885
hsa-mir-454-3p	UQCRFS1	7386	MIMAT0003885
hsa-mir-454-3p	AR	367	MIMAT0003885
hsa-mir-454-3p	CCDC126	90693	MIMAT0003885
hsa-mir-454-3p	USP47	55031	MIMAT0003885
hsa-mir-454-3p	RALGAPB	57148	MIMAT0003885
hsa-mir-454-3p	PFKFB3	5209	MIMAT0003885
hsa-mir-454-3p	ATF7	11016	MIMAT0003885
hsa-mir-454-3p	SOCS6	9306	MIMAT0003885
hsa-mir-454-3p	FEZ2	9637	MIMAT0003885
hsa-mir-454-3p	ZNF692	55657	MIMAT0003885
hsa-mir-454-3p	CLCN5	1184	MIMAT0003885
hsa-mir-454-3p	DSEL	92126	MIMAT0003885
hsa-mir-454-3p	DSEL	92126	MIMAT0003885
hsa-mir-454-3p	ZNF562	54811	MIMAT0003885
hsa-mir-454-3p	CAMTA1	23261	MIMAT0003885
hsa-mir-454-3p	ZNF217	7764	MIMAT0003885
hsa-mir-454-3p	DCP2	167227	MIMAT0003885
hsa-mir-454-3p	ZNF680	340252	MIMAT0003885
hsa-mir-454-3p	KDM2A	22992	MIMAT0003885
hsa-mir-454-3p	VANGL1	81839	MIMAT0003885
hsa-mir-454-3p	TNKS	8658	MIMAT0003885
hsa-mir-454-3p	TNKS	8658	MIMAT0003885
hsa-mir-454-3p	TRIB1	10221	MIMAT0003885
hsa-mir-454-3p	FKBP2	2286	MIMAT0003885
hsa-mir-454-3p	FKBP2	2286	MIMAT0003885
hsa-mir-454-3p	RNF213	57674	MIMAT0003885
hsa-mir-454-3p	DPY19L1	23333	MIMAT0003885
hsa-mir-454-3p	CBX2	84733	MIMAT0003885
hsa-mir-454-3p	LIG4	3981	MIMAT0003885
hsa-mir-454-3p	MSL2	55167	MIMAT0003885
hsa-mir-454-3p	UGT8	7368	MIMAT0003885
hsa-mir-454-3p	PDIK1L	149420	MIMAT0003885
hsa-mir-454-3p	CKAP5	9793	MIMAT0003885
hsa-mir-454-3p	EIF3F	8665	MIMAT0003885
hsa-mir-454-3p	EIF3F	8665	MIMAT0003885
hsa-mir-454-3p	LONRF3	79836	MIMAT0003885
hsa-mir-454-3p	FOSL1	8061	MIMAT0003885
hsa-mir-454-3p	BNIP3	664	MIMAT0003885
hsa-mir-454-3p	RNPEP	6051	MIMAT0003885
hsa-mir-454-3p	MYO1D	4642	MIMAT0003885
hsa-mir-454-3p	CDK5R1	8851	MIMAT0003885
hsa-mir-454-3p	SMCR8	140775	MIMAT0003885
hsa-mir-454-3p	SMCR8	140775	MIMAT0003885
hsa-mir-454-3p	CHD9	80205	MIMAT0003885
hsa-mir-454-3p	ZBTB38	253461	MIMAT0003885
hsa-mir-454-3p	NR2C2	7182	MIMAT0003885
hsa-mir-454-3p	TBL1XR1	79718	MIMAT0003885
hsa-mir-454-3p	ARL6IP6	151188	MIMAT0003885
hsa-mir-454-3p	NDUFV2	4729	MIMAT0003885
hsa-mir-454-3p	CSRNP3	80034	MIMAT0003885
hsa-mir-454-3p	FBXO34	55030	MIMAT0003885
hsa-mir-454-3p	KLHL28	54813	MIMAT0003885
hsa-mir-454-3p	SERTAD2	9792	MIMAT0003885
hsa-mir-454-3p	DCTPP1	79077	MIMAT0003885
hsa-mir-454-3p	TSHZ1	10194	MIMAT0003885
hsa-mir-454-3p	SKIDA1	387640	MIMAT0003885
hsa-mir-454-3p	ZNF594	84622	MIMAT0003885
hsa-mir-454-3p	PCGF5	84333	MIMAT0003885
hsa-mir-454-3p	TMEM64	169200	MIMAT0003885
hsa-mir-454-3p	MUC16	94025	MIMAT0003885
hsa-mir-454-3p	RNF41	10193	MIMAT0003885
hsa-mir-454-3p	LDOC1	23641	MIMAT0003885
hsa-mir-454-3p	TTC3	7267	MIMAT0003885
hsa-mir-454-3p	IQGAP3	128239	MIMAT0003885
hsa-mir-454-3p	UQCR10	29796	MIMAT0003885
hsa-mir-454-3p	ARMCX2	9823	MIMAT0003885
hsa-mir-454-3p	PURA	5813	MIMAT0003885
hsa-mir-454-3p	PRMT3	10196	MIMAT0003885
hsa-mir-454-3p	SP1	6667	MIMAT0003885
hsa-mir-454-3p	MYBL1	4603	MIMAT0003885
hsa-mir-454-3p	ANKFY1	51479	MIMAT0003885
hsa-mir-454-3p	KCNQ5	56479	MIMAT0003885
hsa-mir-454-3p	BICD2	23299	MIMAT0003885
hsa-mir-454-3p	POLR1D	51082	MIMAT0003885
hsa-mir-454-3p	NAP1L1	4673	MIMAT0003885
hsa-mir-454-3p	SESTD1	91404	MIMAT0003885
hsa-mir-454-3p	ZC3H6	376940	MIMAT0003885
hsa-mir-454-3p	TUBB4B	10383	MIMAT0003885
hsa-mir-454-3p	PTAR1	375743	MIMAT0003885
hsa-mir-454-3p	MSL1	339287	MIMAT0003885
hsa-mir-454-3p	ZNF292	23036	MIMAT0003885
hsa-mir-454-3p	ZNF567	163081	MIMAT0003885
hsa-mir-454-3p	MAOA	4128	MIMAT0003885
hsa-mir-454-3p	TSPYL1	7259	MIMAT0003885
hsa-mir-454-3p	IL1RAP	3556	MIMAT0003885
hsa-mir-454-3p	ACADSB	36	MIMAT0003885
hsa-mir-454-3p	ZBTB44	29068	MIMAT0003885
hsa-mir-454-3p	TSC22D2	9819	MIMAT0003885
hsa-mir-454-3p	TCF4	6925	MIMAT0003885
hsa-mir-454-3p	STRN3	29966	MIMAT0003885
hsa-mir-454-3p	SRGAP1	57522	MIMAT0003885
hsa-mir-454-3p	ZSCAN25	221785	MIMAT0003885
hsa-mir-454-3p	DDI2	84301	MIMAT0003885
hsa-mir-454-3p	MYO5A	4644	MIMAT0003885
hsa-mir-454-3p	PSAP	5660	MIMAT0003885
hsa-mir-454-3p	MIER1	57708	MIMAT0003885
hsa-mir-454-3p	HELZ	9931	MIMAT0003885
hsa-mir-454-3p	MDM4	4194	MIMAT0003885
hsa-mir-454-3p	FOXJ3	22887	MIMAT0003885
hsa-mir-454-3p	PNMA5	114824	MIMAT0003885
hsa-mir-454-3p	DZIP3	9666	MIMAT0003885
hsa-mir-454-3p	RORB	6096	MIMAT0003885
hsa-mir-454-3p	PPP1R10	5514	MIMAT0003885
hsa-mir-454-3p	PPP1R10	5514	MIMAT0003885
hsa-mir-454-3p	PPP1R10	5514	MIMAT0003885
hsa-mir-454-3p	PPP1R10	5514	MIMAT0003885
hsa-mir-454-3p	PPP1R10	5514	MIMAT0003885
hsa-mir-454-3p	PPP1R10	5514	MIMAT0003885
hsa-mir-454-3p	PPP1R10	5514	MIMAT0003885
hsa-mir-454-3p	FAM216A	29902	MIMAT0003885
hsa-mir-454-3p	RAB12	201475	MIMAT0003885
hsa-mir-454-3p	SFT2D2	375035	MIMAT0003885
hsa-mir-454-3p	S1PR3	1903	MIMAT0003885
hsa-mir-454-3p	RPS29	6235	MIMAT0003885
hsa-mir-454-3p	RNF103	7844	MIMAT0003885
hsa-mir-454-3p	WBP1	23559	MIMAT0003885
hsa-mir-454-3p	ARPC1A	10552	MIMAT0003885
hsa-mir-454-3p	PEG10	23089	MIMAT0003885
hsa-mir-454-3p	GATC	283459	MIMAT0003885
hsa-mir-454-3p	GAN	8139	MIMAT0003885
hsa-mir-454-3p	DYNLL2	140735	MIMAT0003885
hsa-mir-454-3p	TIMM23	100287932	MIMAT0003885
hsa-mir-454-3p	ZNF850	342892	MIMAT0003885
hsa-mir-454-3p	NDUFA7	4701	MIMAT0003885
hsa-mir-454-3p	NBPF14	25832	MIMAT0003885
hsa-mir-454-3p	C2orf15	150590	MIMAT0003885
hsa-mir-454-3p	MLLT6	4302	MIMAT0003885
hsa-mir-454-3p	MLLT6	4302	MIMAT0003885
hsa-mir-454-5p	AK2	204	MIMAT0003884
hsa-mir-454-5p	ALDOA	226	MIMAT0003884
hsa-mir-454-5p	ALDOC	230	MIMAT0003884
hsa-mir-454-5p	ANG	283	MIMAT0003884
hsa-mir-454-5p	ARSB	411	MIMAT0003884
hsa-mir-454-5p	ASGR1	432	MIMAT0003884
hsa-mir-454-5p	RCAN1	1827	MIMAT0003884
hsa-mir-454-5p	EFNA5	1946	MIMAT0003884
hsa-mir-454-5p	FRK	2444	MIMAT0003884
hsa-mir-454-5p	HOXD9	3235	MIMAT0003884
hsa-mir-454-5p	HSF2	3298	MIMAT0003884
hsa-mir-454-5p	IL5	3567	MIMAT0003884
hsa-mir-454-5p	KCNJ10	3766	MIMAT0003884
hsa-mir-454-5p	LTBR	4055	MIMAT0003884
hsa-mir-454-5p	DDR2	4921	MIMAT0003884
hsa-mir-454-5p	MAPK1	5594	MIMAT0003884
hsa-mir-454-5p	PTK6	5753	MIMAT0003884
hsa-mir-454-5p	RAP1B	5908	MIMAT0003884
hsa-mir-454-5p	ATXN1	6310	MIMAT0003884
hsa-mir-454-5p	CCL16	6360	MIMAT0003884
hsa-mir-454-5p	SNRPD3	6634	MIMAT0003884
hsa-mir-454-5p	TMPO	7112	MIMAT0003884
hsa-mir-454-5p	WEE1	7465	MIMAT0003884
hsa-mir-454-5p	CNBP	7555	MIMAT0003884
hsa-mir-454-5p	AP3B2	8120	MIMAT0003884
hsa-mir-454-5p	MINPP1	9562	MIMAT0003884
hsa-mir-454-5p	PAN2	9924	MIMAT0003884
hsa-mir-454-5p	TRIM10	10107	MIMAT0003884
hsa-mir-454-5p	ARL4C	10123	MIMAT0003884
hsa-mir-454-5p	KLF2	10365	MIMAT0003884
hsa-mir-454-5p	DDX17	10521	MIMAT0003884
hsa-mir-454-5p	NUDT21	11051	MIMAT0003884
hsa-mir-454-5p	ZWINT	11130	MIMAT0003884
hsa-mir-454-5p	DUSP10	11221	MIMAT0003884
hsa-mir-454-5p	CEP152	22995	MIMAT0003884
hsa-mir-454-5p	GIGYF2	26058	MIMAT0003884
hsa-mir-454-5p	LSM14A	26065	MIMAT0003884
hsa-mir-454-5p	USP25	29761	MIMAT0003884
hsa-mir-454-5p	UCHL5	51377	MIMAT0003884
hsa-mir-454-5p	KDM3B	51780	MIMAT0003884
hsa-mir-454-5p	IPO9	55705	MIMAT0003884
hsa-mir-454-5p	LMBR1L	55716	MIMAT0003884
hsa-mir-454-5p	RNF20	56254	MIMAT0003884
hsa-mir-454-5p	SERTAD4	56256	MIMAT0003884
hsa-mir-454-5p	CRAMP1	57585	MIMAT0003884
hsa-mir-454-5p	PLEKHA1	59338	MIMAT0003884
hsa-mir-454-5p	PHACTR4	65979	MIMAT0003884
hsa-mir-454-5p	ZSCAN16	80345	MIMAT0003884
hsa-mir-454-5p	TNKS2	80351	MIMAT0003884
hsa-mir-454-5p	TANGO2	128989	MIMAT0003884
hsa-mir-454-5p	LDHD	197257	MIMAT0003884
hsa-mir-454-5p	UBN2	254048	MIMAT0003884
hsa-mir-454-5p	BCLAF3	256643	MIMAT0003884
hsa-mir-454-5p	RABL3	285282	MIMAT0003884
hsa-mir-454-5p	ZNF660	285349	MIMAT0003884
hsa-mir-454-5p	FOXL2NB	401089	MIMAT0003884
hsa-mir-454-5p	MINOS1	440574	MIMAT0003884
hsa-mir-454-5p	BCL2L15	440603	MIMAT0003884
hsa-mir-454-5p	SHISA9	729993	MIMAT0003884
hsa-mir-454-5p	MAPK1	5594	MIMAT0003884
hsa-mir-454-5p	NDUFS1	4719	MIMAT0003884
hsa-mir-454-5p	NDUFS1	4719	MIMAT0003884
hsa-mir-454-5p	TAB2	23118	MIMAT0003884
hsa-mir-454-5p	TAB2	23118	MIMAT0003884
hsa-mir-454-5p	SPHK2	56848	MIMAT0003884
hsa-mir-454-5p	AHRR	57491	MIMAT0003884
hsa-mir-454-5p	GNAI3	2773	MIMAT0003884
hsa-mir-454-5p	PKN2	5586	MIMAT0003884
hsa-mir-454-5p	RRP15	51018	MIMAT0003884
hsa-mir-454-5p	ATP1B3	483	MIMAT0003884
hsa-mir-454-5p	ALDH3A2	224	MIMAT0003884
hsa-mir-454-5p	CYLD	1540	MIMAT0003884
hsa-mir-454-5p	STARD7	56910	MIMAT0003884
hsa-mir-454-5p	SH3BP2	6452	MIMAT0003884
hsa-mir-454-5p	PPP2R3C	55012	MIMAT0003884
hsa-mir-454-5p	TNRC6B	23112	MIMAT0003884
hsa-mir-454-5p	ACIN1	22985	MIMAT0003884
hsa-mir-454-5p	CDK5RAP1	51654	MIMAT0003884
hsa-mir-454-5p	PIM2	11040	MIMAT0003884
hsa-mir-454-5p	USP11	8237	MIMAT0003884
hsa-mir-454-5p	EIF3E	3646	MIMAT0003884
hsa-mir-454-5p	EIF3A	8661	MIMAT0003884
hsa-mir-454-5p	NUFIP2	57532	MIMAT0003884
hsa-mir-454-5p	PMP22	5376	MIMAT0003884
hsa-mir-454-5p	CCND1	595	MIMAT0003884
hsa-mir-454-5p	OAS3	4940	MIMAT0003884
hsa-mir-454-5p	SLC38A1	81539	MIMAT0003884
hsa-mir-454-5p	VNN1	8876	MIMAT0003884
hsa-mir-454-5p	LIFR	3977	MIMAT0003884
hsa-mir-454-5p	EHHADH	1962	MIMAT0003884
hsa-mir-454-5p	TFG	10342	MIMAT0003884
hsa-mir-454-5p	BIRC6	57448	MIMAT0003884
hsa-mir-454-5p	WDR34	89891	MIMAT0003884
hsa-mir-454-5p	FAM98A	25940	MIMAT0003884
hsa-mir-454-5p	PCMT1	5110	MIMAT0003884
hsa-mir-454-5p	UTP20	27340	MIMAT0003884
hsa-mir-454-5p	EBPL	84650	MIMAT0003884
hsa-mir-454-5p	PPP1R12C	54776	MIMAT0003884
hsa-mir-454-5p	PHF10	55274	MIMAT0003884
hsa-mir-454-5p	SESN2	83667	MIMAT0003884
hsa-mir-454-5p	SESN2	83667	MIMAT0003884
hsa-mir-454-5p	RLIM	51132	MIMAT0003884
hsa-mir-454-5p	ANKHD1	54882	MIMAT0003884
hsa-mir-454-5p	ACTR10	55860	MIMAT0003884
hsa-mir-454-5p	ENPP2	5168	MIMAT0003884
hsa-mir-454-5p	RNF38	152006	MIMAT0003884
hsa-mir-454-5p	SLC39A6	25800	MIMAT0003884
hsa-mir-454-5p	FKBP10	60681	MIMAT0003884
hsa-mir-454-5p	INTS3	65123	MIMAT0003884
hsa-mir-454-5p	INTS3	65123	MIMAT0003884
hsa-mir-454-5p	PURB	5814	MIMAT0003884
hsa-mir-454-5p	OGT	8473	MIMAT0003884
hsa-mir-454-5p	LIN7C	55327	MIMAT0003884
hsa-mir-454-5p	ACAD8	27034	MIMAT0003884
hsa-mir-454-5p	TRIM11	81559	MIMAT0003884
hsa-mir-454-5p	FBXL18	80028	MIMAT0003884
hsa-mir-454-5p	AZIN1	51582	MIMAT0003884
hsa-mir-454-5p	ZKSCAN2	342357	MIMAT0003884
hsa-mir-454-5p	UBR1	197131	MIMAT0003884
hsa-mir-454-5p	TAOK1	57551	MIMAT0003884
hsa-mir-454-5p	CMPK1	51727	MIMAT0003884
hsa-mir-454-5p	DNAJB4	11080	MIMAT0003884
hsa-mir-454-5p	DHX57	90957	MIMAT0003884
hsa-mir-454-5p	LMBRD2	92255	MIMAT0003884
hsa-mir-454-5p	ANKRA2	57763	MIMAT0003884
hsa-mir-454-5p	TMUB1	83590	MIMAT0003884
hsa-mir-454-5p	FBXO33	254170	MIMAT0003884
hsa-mir-454-5p	PCF11	51585	MIMAT0003884
hsa-mir-454-5p	SERTAD3	29946	MIMAT0003884
hsa-mir-454-5p	FEM1B	10116	MIMAT0003884
hsa-mir-454-5p	SLC25A6	293	MIMAT0003884
hsa-mir-454-5p	YWHAG	7532	MIMAT0003884
hsa-mir-454-5p	LONRF2	164832	MIMAT0003884
hsa-mir-454-5p	NPTX1	4884	MIMAT0003884
hsa-mir-454-5p	RPL38	6169	MIMAT0003884
hsa-mir-454-5p	RGMB	285704	MIMAT0003884
hsa-mir-454-5p	FAM91A1	157769	MIMAT0003884
hsa-mir-454-5p	SAMD12	401474	MIMAT0003884
hsa-mir-454-5p	EHMT1	79813	MIMAT0003884
hsa-mir-454-5p	POLR2A	5430	MIMAT0003884
hsa-mir-454-5p	POLR2A	5430	MIMAT0003884
hsa-mir-454-5p	BCOR	54880	MIMAT0003884
hsa-mir-454-5p	ZNRF3	84133	MIMAT0003884
hsa-mir-454-5p	COA3	28958	MIMAT0003884
hsa-mir-454-5p	PTCH1	5727	MIMAT0003884
hsa-mir-454-5p	PPP1CC	5501	MIMAT0003884
hsa-mir-454-5p	INSIG1	3638	MIMAT0003884
hsa-mir-454-5p	TET3	200424	MIMAT0003884
hsa-mir-454-5p	SLC39A10	57181	MIMAT0003884
hsa-mir-454-5p	PSAP	5660	MIMAT0003884
hsa-mir-454-5p	GFPT1	2673	MIMAT0003884
hsa-mir-454-5p	ZNF277	11179	MIMAT0003884
hsa-mir-454-5p	STK38L	23012	MIMAT0003884
hsa-mir-454-5p	TMEM242	729515	MIMAT0003884
hsa-mir-454-5p	APOL6	80830	MIMAT0003884
hsa-mir-454-5p	ANKRD66	100287718	MIMAT0003884
hsa-mir-454-5p	TXNIP	10628	MIMAT0003884
hsa-mir-454-5p	MARCKS	4082	MIMAT0003884
hsa-mir-493-3p	ACTB	60	MIMAT0003161
hsa-mir-493-3p	ALDOA	226	MIMAT0003161
hsa-mir-493-3p	RHOC	389	MIMAT0003161
hsa-mir-493-3p	ARHGAP5	394	MIMAT0003161
hsa-mir-493-3p	KIF1A	547	MIMAT0003161
hsa-mir-493-3p	CALM1	801	MIMAT0003161
hsa-mir-493-3p	DDB1	1642	MIMAT0003161
hsa-mir-493-3p	EIF4A1	1973	MIMAT0003161
hsa-mir-493-3p	GNB1	2782	MIMAT0003161
hsa-mir-493-3p	HNRNPU	3192	MIMAT0003161
hsa-mir-493-3p	HSPA4	3308	MIMAT0003161
hsa-mir-493-3p	IARS	3376	MIMAT0003161
hsa-mir-493-3p	KCNJ4	3761	MIMAT0003161
hsa-mir-493-3p	LGALS3BP	3959	MIMAT0003161
hsa-mir-493-3p	LIFR	3977	MIMAT0003161
hsa-mir-493-3p	MAP2	4133	MIMAT0003161
hsa-mir-493-3p	MXI1	4601	MIMAT0003161
hsa-mir-493-3p	NFATC3	4775	MIMAT0003161
hsa-mir-493-3p	NKX6-1	4825	MIMAT0003161
hsa-mir-493-3p	PAWR	5074	MIMAT0003161
hsa-mir-493-3p	PPP1CC	5501	MIMAT0003161
hsa-mir-493-3p	PRKCH	5583	MIMAT0003161
hsa-mir-493-3p	MAP2K7	5609	MIMAT0003161
hsa-mir-493-3p	PSMD7	5713	MIMAT0003161
hsa-mir-493-3p	PEX2	5828	MIMAT0003161
hsa-mir-493-3p	RAD51	5888	MIMAT0003161
hsa-mir-493-3p	TRIM27	5987	MIMAT0003161
hsa-mir-493-3p	RPL3	6122	MIMAT0003161
hsa-mir-493-3p	SIAH2	6478	MIMAT0003161
hsa-mir-493-3p	SKP1	6500	MIMAT0003161
hsa-mir-493-3p	SP100	6672	MIMAT0003161
hsa-mir-493-3p	UBE2D3	7323	MIMAT0003161
hsa-mir-493-3p	VLDLR	7436	MIMAT0003161
hsa-mir-493-3p	YWHAZ	7534	MIMAT0003161
hsa-mir-493-3p	CSDE1	7812	MIMAT0003161
hsa-mir-493-3p	SLC7A5	8140	MIMAT0003161
hsa-mir-493-3p	FZD4	8322	MIMAT0003161
hsa-mir-493-3p	PEA15	8682	MIMAT0003161
hsa-mir-493-3p	BTRC	8945	MIMAT0003161
hsa-mir-493-3p	XPR1	9213	MIMAT0003161
hsa-mir-493-3p	SRSF11	9295	MIMAT0003161
hsa-mir-493-3p	KCNB2	9312	MIMAT0003161
hsa-mir-493-3p	PDE4DIP	9659	MIMAT0003161
hsa-mir-493-3p	DAZAP2	9802	MIMAT0003161
hsa-mir-493-3p	SMG7	9887	MIMAT0003161
hsa-mir-493-3p	HS3ST1	9957	MIMAT0003161
hsa-mir-493-3p	CITED2	10370	MIMAT0003161
hsa-mir-493-3p	CRTAP	10491	MIMAT0003161
hsa-mir-493-3p	CELF1	10658	MIMAT0003161
hsa-mir-493-3p	TMED10	10972	MIMAT0003161
hsa-mir-493-3p	RAB31	11031	MIMAT0003161
hsa-mir-493-3p	ABHD2	11057	MIMAT0003161
hsa-mir-493-3p	NXPH3	11248	MIMAT0003161
hsa-mir-493-3p	COPG1	22820	MIMAT0003161
hsa-mir-493-3p	ZNF507	22847	MIMAT0003161
hsa-mir-493-3p	DKK1	22943	MIMAT0003161
hsa-mir-493-3p	MYCBP2	23077	MIMAT0003161
hsa-mir-493-3p	ZCCHC14	23174	MIMAT0003161
hsa-mir-493-3p	SSBP2	23635	MIMAT0003161
hsa-mir-493-3p	PLXNB2	23654	MIMAT0003161
hsa-mir-493-3p	CLIC4	25932	MIMAT0003161
hsa-mir-493-3p	RTL8A	26071	MIMAT0003161
hsa-mir-493-3p	ASAP1	50807	MIMAT0003161
hsa-mir-493-3p	SH3GLB1	51100	MIMAT0003161
hsa-mir-493-3p	GOLPH3L	55204	MIMAT0003161
hsa-mir-493-3p	FEM1A	55527	MIMAT0003161
hsa-mir-493-3p	VPS35	55737	MIMAT0003161
hsa-mir-493-3p	CNDP2	55748	MIMAT0003161
hsa-mir-493-3p	NKRF	55922	MIMAT0003161
hsa-mir-493-3p	ATP10D	57205	MIMAT0003161
hsa-mir-493-3p	CBX8	57332	MIMAT0003161
hsa-mir-493-3p	TRIB3	57761	MIMAT0003161
hsa-mir-493-3p	TMEM109	79073	MIMAT0003161
hsa-mir-493-3p	PPP1R3B	79660	MIMAT0003161
hsa-mir-493-3p	BRIP1	83990	MIMAT0003161
hsa-mir-493-3p	MAP3K21	84451	MIMAT0003161
hsa-mir-493-3p	LMNB2	84823	MIMAT0003161
hsa-mir-493-3p	ZNF670	93474	MIMAT0003161
hsa-mir-493-3p	ZNF689	115509	MIMAT0003161
hsa-mir-493-3p	FOXP4	116113	MIMAT0003161
hsa-mir-493-3p	SLC43A2	124935	MIMAT0003161
hsa-mir-493-3p	AADACL3	126767	MIMAT0003161
hsa-mir-493-3p	ZNF645	158506	MIMAT0003161
hsa-mir-493-3p	DENND5B	160518	MIMAT0003161
hsa-mir-493-3p	ZNF678	339500	MIMAT0003161
hsa-mir-493-3p	FMN1	342184	MIMAT0003161
hsa-mir-493-3p	WDR82P1	728505	MIMAT0003161
hsa-mir-493-3p	SYCE1L	100130958	MIMAT0003161
hsa-mir-493-3p	DDB1	1642	MIMAT0003161
hsa-mir-493-3p	GNB1	2782	MIMAT0003161
hsa-mir-493-3p	PRKCH	5583	MIMAT0003161
hsa-mir-493-3p	RPL3	6122	MIMAT0003161
hsa-mir-493-3p	KCNB2	9312	MIMAT0003161
hsa-mir-493-3p	ZNF507	22847	MIMAT0003161
hsa-mir-493-3p	DKK1	22943	MIMAT0003161
hsa-mir-493-3p	PLXNB2	23654	MIMAT0003161
hsa-mir-493-3p	CYB561	1534	MIMAT0003161
hsa-mir-493-3p	UBE3C	9690	MIMAT0003161
hsa-mir-493-3p	KDM5D	8284	MIMAT0003161
hsa-mir-493-3p	STRAP	11171	MIMAT0003161
hsa-mir-493-3p	CD44	960	MIMAT0003161
hsa-mir-493-3p	TIMP2	7077	MIMAT0003161
hsa-mir-493-3p	TBC1D23	55773	MIMAT0003161
hsa-mir-493-3p	TRIO	7204	MIMAT0003161
hsa-mir-493-3p	CDH1	999	MIMAT0003161
hsa-mir-493-3p	VAMP3	9341	MIMAT0003161
hsa-mir-493-3p	GINM1	116254	MIMAT0003161
hsa-mir-493-3p	PUM2	23369	MIMAT0003161
hsa-mir-493-3p	LAMC2	3918	MIMAT0003161
hsa-mir-493-3p	NCKAP1	10787	MIMAT0003161
hsa-mir-493-3p	KDM5A	5927	MIMAT0003161
hsa-mir-493-3p	NSF	4905	MIMAT0003161
hsa-mir-493-3p	NSF	4905	MIMAT0003161
hsa-mir-493-3p	NSF	4905	MIMAT0003161
hsa-mir-493-3p	ZNF638	27332	MIMAT0003161
hsa-mir-493-3p	FOSL2	2355	MIMAT0003161
hsa-mir-493-3p	FSCN1	6624	MIMAT0003161
hsa-mir-493-3p	IL4R	3566	MIMAT0003161
hsa-mir-493-3p	FGFR1	2260	MIMAT0003161
hsa-mir-493-3p	SRCAP	10847	MIMAT0003161
hsa-mir-493-3p	MTIF2	4528	MIMAT0003161
hsa-mir-493-3p	NID2	22795	MIMAT0003161
hsa-mir-493-3p	MLF2	8079	MIMAT0003161
hsa-mir-493-3p	CDV3	55573	MIMAT0003161
hsa-mir-493-3p	CCDC80	151887	MIMAT0003161
hsa-mir-493-3p	IKZF5	64376	MIMAT0003161
hsa-mir-493-3p	HSP90AB1	3326	MIMAT0003161
hsa-mir-493-3p	ABLIM1	3983	MIMAT0003161
hsa-mir-493-3p	TSPO	706	MIMAT0003161
hsa-mir-493-3p	TNRC6B	23112	MIMAT0003161
hsa-mir-493-3p	ACIN1	22985	MIMAT0003161
hsa-mir-493-3p	HNF4A	3172	MIMAT0003161
hsa-mir-493-3p	JAG1	182	MIMAT0003161
hsa-mir-493-3p	RAB2A	5862	MIMAT0003161
hsa-mir-493-3p	TNPO2	30000	MIMAT0003161
hsa-mir-493-3p	NAMPT	10135	MIMAT0003161
hsa-mir-493-3p	OGDH	4967	MIMAT0003161
hsa-mir-493-3p	PFN1	5216	MIMAT0003161
hsa-mir-493-3p	B9D1	27077	MIMAT0003161
hsa-mir-493-3p	TBC1D9	23158	MIMAT0003161
hsa-mir-493-3p	COL12A1	1303	MIMAT0003161
hsa-mir-493-3p	PTK7	5754	MIMAT0003161
hsa-mir-493-3p	HBEGF	1839	MIMAT0003161
hsa-mir-493-3p	SPARC	6678	MIMAT0003161
hsa-mir-493-3p	GNPDA1	10007	MIMAT0003161
hsa-mir-493-3p	IL1A	3552	MIMAT0003161
hsa-mir-493-3p	TFCP2L1	29842	MIMAT0003161
hsa-mir-493-3p	SPTBN1	6711	MIMAT0003161
hsa-mir-493-3p	MRPL19	9801	MIMAT0003161
hsa-mir-493-3p	LANCL1	10314	MIMAT0003161
hsa-mir-493-3p	FHL2	2274	MIMAT0003161
[truncated: 2,057 more rows]

## Sheet: 15b
hsa-mir-15b-3p	ABCD2
hsa-mir-15b-3p	XIAP
hsa-mir-15b-3p	CACNA1B
hsa-mir-15b-3p	CBFA2T3
hsa-mir-15b-3p	CCND3
hsa-mir-15b-3p	TOR1A
hsa-mir-15b-3p	FASN
hsa-mir-15b-3p	GLO1
hsa-mir-15b-3p	IGF1R
hsa-mir-15b-3p	MYH9
hsa-mir-15b-3p	PCCA
hsa-mir-15b-3p	PLAGL2
hsa-mir-15b-3p	PMAIP1
hsa-mir-15b-3p	PTPRF
hsa-mir-15b-3p	SSFA2
hsa-mir-15b-3p	THRB
hsa-mir-15b-3p	WEE1
hsa-mir-15b-3p	ZNF708
hsa-mir-15b-3p	ZNF28
hsa-mir-15b-3p	ZNF202
hsa-mir-15b-3p	RND2
hsa-mir-15b-3p	RECK
hsa-mir-15b-3p	STX11
hsa-mir-15b-3p	TM9SF2
hsa-mir-15b-3p	TOX4
hsa-mir-15b-3p	PTBP3
hsa-mir-15b-3p	DCTN6
hsa-mir-15b-3p	IFI44L
hsa-mir-15b-3p	TRIM31
hsa-mir-15b-3p	DNAJB4
hsa-mir-15b-3p	ELL2
hsa-mir-15b-3p	SIRT4
hsa-mir-15b-3p	TMEM50A
hsa-mir-15b-3p	PISD
hsa-mir-15b-3p	PRICKLE4
hsa-mir-15b-3p	MINK1
hsa-mir-15b-3p	GLRX5
hsa-mir-15b-3p	IL20RB
hsa-mir-15b-3p	NEURL1B
hsa-mir-15b-3p	TBC1D13
hsa-mir-15b-3p	CNTLN
hsa-mir-15b-3p	SOBP
hsa-mir-15b-3p	C5orf22
hsa-mir-15b-3p	SLC30A6
hsa-mir-15b-3p	NLGN2
hsa-mir-15b-3p	BACH2
hsa-mir-15b-3p	MRPS35
hsa-mir-15b-3p	PLEKHA3
hsa-mir-15b-3p	RETREG2
hsa-mir-15b-3p	GTDC1
hsa-mir-15b-3p	MCMBP
hsa-mir-15b-3p	CSRNP3
hsa-mir-15b-3p	ANKRD27
hsa-mir-15b-3p	GON7
hsa-mir-15b-3p	ZBTB37
hsa-mir-15b-3p	ST6GAL2
hsa-mir-15b-3p	C12orf29
hsa-mir-15b-3p	ARHGAP18
hsa-mir-15b-3p	ABCC12
hsa-mir-15b-3p	ABHD15
hsa-mir-15b-3p	TAF8
hsa-mir-15b-3p	MUC15
hsa-mir-15b-3p	TMED4
hsa-mir-15b-3p	ZC3H12B
hsa-mir-15b-3p	MXRA7
hsa-mir-15b-3p	KIAA0895L
hsa-mir-15b-3p	MYH9
hsa-mir-15b-3p	WEE1
hsa-mir-15b-3p	ELL2
hsa-mir-15b-3p	MINK1
hsa-mir-15b-3p	GLRX5
hsa-mir-15b-3p	ABCC12
hsa-mir-15b-3p	CYP51A1
hsa-mir-15b-3p	SLC7A2
hsa-mir-15b-3p	RECQL
hsa-mir-15b-3p	THSD7A
hsa-mir-15b-3p	BAZ1B
hsa-mir-15b-3p	POLR3B
hsa-mir-15b-3p	CPS1
hsa-mir-15b-3p	AKAP11
hsa-mir-15b-3p	SLC4A7
hsa-mir-15b-3p	VPS13D
hsa-mir-15b-3p	SLC4A8
hsa-mir-15b-3p	TNIP3
hsa-mir-15b-3p	ZC3H11A
hsa-mir-15b-3p	CTSA
hsa-mir-15b-3p	FAR2
hsa-mir-15b-3p	PKN2
hsa-mir-15b-3p	SPEN
hsa-mir-15b-3p	POLR1A
hsa-mir-15b-3p	SMC1A
hsa-mir-15b-3p	LMAN1
hsa-mir-15b-3p	DLG1
hsa-mir-15b-3p	CAPN6
hsa-mir-15b-3p	N4BP2
hsa-mir-15b-3p	CXCL2
hsa-mir-15b-3p	STRADB
hsa-mir-15b-3p	TXLNA
hsa-mir-15b-3p	BCORL1
hsa-mir-15b-3p	HUWE1
hsa-mir-15b-3p	FTL
hsa-mir-15b-3p	NID2
hsa-mir-15b-3p	KHSRP
hsa-mir-15b-3p	PDRG1
hsa-mir-15b-3p	PPP1R13B
hsa-mir-15b-3p	ZNF268
hsa-mir-15b-3p	TNRC6A
hsa-mir-15b-3p	TNRC6A
hsa-mir-15b-3p	NUP50
hsa-mir-15b-3p	MAP3K1
hsa-mir-15b-3p	SCD
hsa-mir-15b-3p	MKNK2
hsa-mir-15b-3p	CABP7
hsa-mir-15b-3p	PABPN1
hsa-mir-15b-3p	IFT52
hsa-mir-15b-3p	ADNP
hsa-mir-15b-3p	NFAT5
hsa-mir-15b-3p	USP10
hsa-mir-15b-3p	STK3
hsa-mir-15b-3p	SNX16
hsa-mir-15b-3p	GSR
hsa-mir-15b-3p	CDK6
hsa-mir-15b-3p	MTPN
hsa-mir-15b-3p	RBM28
hsa-mir-15b-3p	ACBD5
hsa-mir-15b-3p	CUL2
hsa-mir-15b-3p	SULT1E1
hsa-mir-15b-3p	RPS13
hsa-mir-15b-3p	RAB5B
hsa-mir-15b-3p	CMAS
hsa-mir-15b-3p	COL12A1
hsa-mir-15b-3p	NNT
hsa-mir-15b-3p	HSPA9
hsa-mir-15b-3p	PDE4D
hsa-mir-15b-3p	PRLR
hsa-mir-15b-3p	UXS1
hsa-mir-15b-3p	ODC1
hsa-mir-15b-3p	SLC25A12
hsa-mir-15b-3p	NFE2L2
hsa-mir-15b-3p	SFPQ
hsa-mir-15b-3p	MTR
hsa-mir-15b-3p	STAG1
hsa-mir-15b-3p	CCND2
hsa-mir-15b-3p	ELF1
hsa-mir-15b-3p	RBBP6
hsa-mir-15b-3p	ZNF644
hsa-mir-15b-3p	STIL
hsa-mir-15b-3p	MORF4L2
hsa-mir-15b-3p	ZNF391
hsa-mir-15b-3p	CDKN1A
hsa-mir-15b-3p	MED1
hsa-mir-15b-3p	POT1
hsa-mir-15b-3p	SUMF2
hsa-mir-15b-3p	RPL36
hsa-mir-15b-3p	KIF1A
hsa-mir-15b-3p	EXOSC2
hsa-mir-15b-3p	IRS4
hsa-mir-15b-3p	IRS4
hsa-mir-15b-3p	IPO8
hsa-mir-15b-3p	TMED7
hsa-mir-15b-3p	SRPK2
hsa-mir-15b-3p	HNRNPA1
hsa-mir-15b-3p	CD164
hsa-mir-15b-3p	IREB2
hsa-mir-15b-3p	SDCBP
hsa-mir-15b-3p	THBS1
hsa-mir-15b-3p	RBM26
hsa-mir-15b-3p	UBE2Q2
hsa-mir-15b-3p	WDR61
hsa-mir-15b-3p	RNF157
hsa-mir-15b-3p	CBLN2
hsa-mir-15b-3p	ISG20L2
hsa-mir-15b-3p	MCL1
hsa-mir-15b-3p	ENSA
hsa-mir-15b-3p	ETNK2
hsa-mir-15b-3p	DYNLT1
hsa-mir-15b-3p	TMEM168
hsa-mir-15b-3p	NCAPG2
hsa-mir-15b-3p	CASK
hsa-mir-15b-3p	FAM171A1
hsa-mir-15b-3p	EIF4EBP2
hsa-mir-15b-3p	CPSF7
hsa-mir-15b-3p	AKR1C2
hsa-mir-15b-3p	CACUL1
hsa-mir-15b-3p	UHMK1
hsa-mir-15b-3p	LPCAT1
hsa-mir-15b-3p	LPCAT1
hsa-mir-15b-3p	DDAH1
hsa-mir-15b-3p	XPC
hsa-mir-15b-3p	MIER3
hsa-mir-15b-3p	DEPTOR
hsa-mir-15b-3p	PAXIP1
hsa-mir-15b-3p	RER1
hsa-mir-15b-3p	IGF2BP1
hsa-mir-15b-3p	BTG2
hsa-mir-15b-3p	CCDC117
hsa-mir-15b-3p	DFFA
hsa-mir-15b-3p	TAOK1
hsa-mir-15b-3p	GABRB1
hsa-mir-15b-3p	ATP1A1
hsa-mir-15b-3p	HEYL
hsa-mir-15b-3p	PBRM1
hsa-mir-15b-3p	FOXK1
hsa-mir-15b-3p	PDZD8
hsa-mir-15b-3p	FAM204A
hsa-mir-15b-3p	SGPL1
hsa-mir-15b-3p	MCM7
hsa-mir-15b-3p	TMED3
hsa-mir-15b-3p	HSP90B1
hsa-mir-15b-3p	VPS37C
hsa-mir-15b-3p	DDIT4
hsa-mir-15b-3p	ADAM9
hsa-mir-15b-3p	ADAM9
hsa-mir-15b-3p	MAT2A
hsa-mir-15b-3p	RAB3B
hsa-mir-15b-3p	CA5B
hsa-mir-15b-3p	NRG4
hsa-mir-15b-3p	HNRNPF
hsa-mir-15b-3p	CSGALNACT2
hsa-mir-15b-3p	KBTBD2
hsa-mir-15b-3p	KIAA0232
hsa-mir-15b-3p	ZNF581
hsa-mir-15b-3p	BPTF
hsa-mir-15b-3p	CAMTA1
hsa-mir-15b-3p	USP19
hsa-mir-15b-3p	PDE3A
hsa-mir-15b-3p	MOB1B
hsa-mir-15b-3p	CHST2
hsa-mir-15b-3p	LYSMD3
hsa-mir-15b-3p	MYPOP
hsa-mir-15b-3p	LPCAT4
hsa-mir-15b-3p	HNRNPA0
hsa-mir-15b-3p	GALNT11
hsa-mir-15b-3p	GEN1
hsa-mir-15b-3p	TMEM107
hsa-mir-15b-3p	TMEM64
hsa-mir-15b-3p	BHLHE22
hsa-mir-15b-3p	PLAG1
hsa-mir-15b-3p	PRKAG1
hsa-mir-15b-3p	ACBD3
hsa-mir-15b-3p	PRKX
hsa-mir-15b-3p	SLITRK6
hsa-mir-15b-3p	C6orf120
hsa-mir-15b-3p	ZNF397
hsa-mir-15b-3p	COL14A1
hsa-mir-15b-3p	ZNF292
hsa-mir-15b-3p	AKR1C3
hsa-mir-15b-3p	ACADSB
hsa-mir-15b-3p	FAM217B
hsa-mir-15b-3p	ZNF774
hsa-mir-15b-3p	PIK3R4
hsa-mir-15b-3p	HIBCH
hsa-mir-15b-3p	SULT1C2
hsa-mir-15b-3p	HELZ
hsa-mir-15b-3p	TXNRD1
hsa-mir-15b-3p	C6orf89
hsa-mir-15b-3p	TAP2
hsa-mir-15b-3p	TAP2
hsa-mir-15b-3p	TAP2
hsa-mir-15b-3p	TAP2
hsa-mir-15b-3p	TAP2
hsa-mir-15b-3p	TAP2
hsa-mir-15b-3p	TAP2
hsa-mir-15b-3p	TAP2
hsa-mir-15b-3p	ITGA1
hsa-mir-15b-3p	ZNF726
hsa-mir-15b-3p	EFNA4
hsa-mir-15b-3p	ADH1C

## Sheet: 299
hsa-mir-299-5p	ACTC1
hsa-mir-299-5p	ATP6V1A
hsa-mir-299-5p	CDKN1A
hsa-mir-299-5p	FOLR1
hsa-mir-299-5p	H3F3B
hsa-mir-299-5p	HIF1A
hsa-mir-299-5p	LDLR
hsa-mir-299-5p	NEUROD1
hsa-mir-299-5p	PBX2P1
hsa-mir-299-5p	RGL2
hsa-mir-299-5p	ROBO1
hsa-mir-299-5p	SOX4
hsa-mir-299-5p	SPP1
hsa-mir-299-5p	STRN
hsa-mir-299-5p	HIST1H2BE
hsa-mir-299-5p	RECK
hsa-mir-299-5p	STX16
hsa-mir-299-5p	HIST1H3F
hsa-mir-299-5p	ATG5
hsa-mir-299-5p	SAE1
hsa-mir-299-5p	PLXNC1
hsa-mir-299-5p	ZNF256
hsa-mir-299-5p	HAX1
hsa-mir-299-5p	HOXB13
hsa-mir-299-5p	SLC35A1
hsa-mir-299-5p	POLQ
hsa-mir-299-5p	RAB10
hsa-mir-299-5p	TCERG1
hsa-mir-299-5p	PAPD7
hsa-mir-299-5p	SEC63
hsa-mir-299-5p	RAB21
hsa-mir-299-5p	TNRC6B
hsa-mir-299-5p	TBC1D1
hsa-mir-299-5p	CTDNEP1
hsa-mir-299-5p	ARIH1
hsa-mir-299-5p	TNRC6A
hsa-mir-299-5p	CERS2
hsa-mir-299-5p	HDGFL3
hsa-mir-299-5p	DCTN4
hsa-mir-299-5p	KLF3
hsa-mir-299-5p	LIMA1
hsa-mir-299-5p	PHAX
hsa-mir-299-5p	POLE3
hsa-mir-299-5p	DCAF16
hsa-mir-299-5p	PSPC1
hsa-mir-299-5p	KLHL42
hsa-mir-299-5p	CREBZF
hsa-mir-299-5p	ZBTB10
hsa-mir-299-5p	EDEM3
hsa-mir-299-5p	CLPB
hsa-mir-299-5p	CDCA7
hsa-mir-299-5p	DCUN1D5
hsa-mir-299-5p	EIF1AD
hsa-mir-299-5p	SLX4
hsa-mir-299-5p	TSLP
hsa-mir-299-5p	H2AFV
hsa-mir-299-5p	LRRC15
hsa-mir-299-5p	FAM84A
hsa-mir-299-5p	CNKSR3
hsa-mir-299-5p	TVP23C
hsa-mir-299-5p	ARL5B
hsa-mir-299-5p	SFT2D2
hsa-mir-299-5p	MTRNR2L2
hsa-mir-299-5p	ATP6V1A
hsa-mir-299-5p	CDKN1A
hsa-mir-299-5p	STX16
hsa-mir-299-5p	CNKSR3
hsa-mir-299-5p	KIAA0100
hsa-mir-299-5p	RB1CC1
hsa-mir-299-5p	PUM2
hsa-mir-299-5p	HDAC4
hsa-mir-299-5p	IFT80
hsa-mir-299-5p	BAZ2A
hsa-mir-299-5p	TPX2
hsa-mir-299-5p	DDX24
hsa-mir-299-5p	DDX24
hsa-mir-299-5p	CREM
hsa-mir-299-5p	HNRNPH3
hsa-mir-299-5p	DNAJC5
hsa-mir-299-5p	CDC25B
hsa-mir-299-5p	LACTB
hsa-mir-299-5p	MTPN
hsa-mir-299-5p	SERPINE1
hsa-mir-299-5p	MAP3K8
hsa-mir-299-5p	PFN1
hsa-mir-299-5p	COL1A1
hsa-mir-299-5p	TPI1
hsa-mir-299-5p	SOD2
hsa-mir-299-5p	SOD2
hsa-mir-299-5p	MAN2A1
hsa-mir-299-5p	FN1
hsa-mir-299-5p	IGFBP5
hsa-mir-299-5p	FHL2
hsa-mir-299-5p	ERRFI1
hsa-mir-299-5p	LEPR
hsa-mir-299-5p	SGK1
hsa-mir-299-5p	MED28
hsa-mir-299-5p	CCNI
hsa-mir-299-5p	CPXM2
hsa-mir-299-5p	PPP1R12C
hsa-mir-299-5p	CALU
hsa-mir-299-5p	TTBK2
hsa-mir-299-5p	COPB1
hsa-mir-299-5p	OSER1
hsa-mir-299-5p	EMP1
hsa-mir-299-5p	YAP1
hsa-mir-299-5p	ARHGAP29
hsa-mir-299-5p	SCARB2
hsa-mir-299-5p	LUM
hsa-mir-299-5p	APP
hsa-mir-299-5p	SSRP1
hsa-mir-299-5p	TMEM132D
hsa-mir-299-5p	NUP35
hsa-mir-299-5p	PDLIM5
hsa-mir-299-5p	HIPK1
hsa-mir-299-5p	ANXA5
hsa-mir-299-5p	PRMT9
hsa-mir-299-5p	CTSB
hsa-mir-299-5p	CTSB
hsa-mir-299-5p	NFIL3
hsa-mir-299-5p	NSD1
hsa-mir-299-5p	TBC1D2B
hsa-mir-299-5p	IGF2
hsa-mir-299-5p	GPX4
hsa-mir-299-5p	TTC39C
hsa-mir-299-5p	SMIM4
hsa-mir-299-5p	FEM1B
hsa-mir-299-5p	UGP2
hsa-mir-299-5p	ARL6IP1
hsa-mir-299-5p	PRNP
hsa-mir-299-5p	ZNF217
hsa-mir-299-5p	TNFSF15
hsa-mir-299-5p	SIAH2
hsa-mir-299-5p	EXOC7
hsa-mir-299-5p	ANXA2
hsa-mir-299-5p	SOCS3
hsa-mir-299-5p	SP1
hsa-mir-299-5p	ZNF197
hsa-mir-299-5p	ZNF197
hsa-mir-299-5p	TEAD1
hsa-mir-299-5p	COL4A1
hsa-mir-299-5p	MPHOSPH8
hsa-mir-299-5p	PRPF40A
hsa-mir-299-5p	TAF13
hsa-mir-299-5p	SCAMP5
hsa-mir-299-5p	TCTN1
hsa-mir-299-5p	TMEM178B

## Sheet: 337
hsa-mir-337-3p	CASP1
hsa-mir-337-3p	RUNX1T1
hsa-mir-337-3p	CNN3
hsa-mir-337-3p	CSNK2A1
hsa-mir-337-3p	DDX3X
hsa-mir-337-3p	DDX6
hsa-mir-337-3p	FPR1
hsa-mir-337-3p	IFIT3
hsa-mir-337-3p	MTF1
hsa-mir-337-3p	NFATC3
hsa-mir-337-3p	OPRM1
hsa-mir-337-3p	PKN2
hsa-mir-337-3p	PURB
hsa-mir-337-3p	RAP1A
hsa-mir-337-3p	REL
hsa-mir-337-3p	SNRPD1
hsa-mir-337-3p	SPN
hsa-mir-337-3p	STAT3
hsa-mir-337-3p	TFAM
hsa-mir-337-3p	TRPS1
hsa-mir-337-3p	MZF1
hsa-mir-337-3p	PCGF2
hsa-mir-337-3p	FXR1
hsa-mir-337-3p	COIL
hsa-mir-337-3p	GAS7
hsa-mir-337-3p	RNMT
hsa-mir-337-3p	MBD2
hsa-mir-337-3p	CLDN1
hsa-mir-337-3p	GPRIN2
hsa-mir-337-3p	USP3
hsa-mir-337-3p	TSPAN3
hsa-mir-337-3p	RNF41
hsa-mir-337-3p	COQ7
hsa-mir-337-3p	KIF1C
hsa-mir-337-3p	ZNF652
hsa-mir-337-3p	ZFP30
hsa-mir-337-3p	ATP11A
hsa-mir-337-3p	PIGN
hsa-mir-337-3p	KPNA6
hsa-mir-337-3p	SRPX2
hsa-mir-337-3p	RDH11
hsa-mir-337-3p	COMMD2
hsa-mir-337-3p	CRIM1
hsa-mir-337-3p	TRPV2
hsa-mir-337-3p	ZNF107
hsa-mir-337-3p	ROBO4
hsa-mir-337-3p	TBC1D13
hsa-mir-337-3p	ESRP1
hsa-mir-337-3p	2021-03-01
hsa-mir-337-3p	ZWILCH
hsa-mir-337-3p	TMEM248
hsa-mir-337-3p	CDC42BPG
hsa-mir-337-3p	CDKN2AIP
hsa-mir-337-3p	MTA3
hsa-mir-337-3p	SNX16
hsa-mir-337-3p	PAPD5
hsa-mir-337-3p	PANK3
hsa-mir-337-3p	VASH2
hsa-mir-337-3p	ACTR5
hsa-mir-337-3p	L2HGDH
hsa-mir-337-3p	APOL6
hsa-mir-337-3p	LNPK
hsa-mir-337-3p	HOPX
hsa-mir-337-3p	ZNF347
hsa-mir-337-3p	NXPE3
hsa-mir-337-3p	TBCK
hsa-mir-337-3p	TRABD2A
hsa-mir-337-3p	SESN3
hsa-mir-337-3p	BEST3
hsa-mir-337-3p	C1orf210
hsa-mir-337-3p	ITPRIPL1
hsa-mir-337-3p	GDF7
hsa-mir-337-3p	ZDHHC15
hsa-mir-337-3p	IBA57
hsa-mir-337-3p	SMIM14
hsa-mir-337-3p	RICTOR
hsa-mir-337-3p	ZDHHC23
hsa-mir-337-3p	ZNF326
hsa-mir-337-3p	LIN9
hsa-mir-337-3p	PLEKHG7
hsa-mir-337-3p	TMEM236
hsa-mir-337-3p	CSNK2A1
hsa-mir-337-3p	FHL1
hsa-mir-337-3p	TGFBR1
hsa-mir-337-3p	LOX
hsa-mir-337-3p	PDGFRB
hsa-mir-337-3p	ACTR3
hsa-mir-337-3p	CPEB2
hsa-mir-337-3p	CPEB2
hsa-mir-337-3p	THBS2

## Sheet: 379
hsa-mir-379-3p	ADM
hsa-mir-379-3p	AP1G1
hsa-mir-379-3p	ATP1B3
hsa-mir-379-3p	B2M
hsa-mir-379-3p	BMI1
hsa-mir-379-3p	CAPZA2
hsa-mir-379-3p	CPE
hsa-mir-379-3p	ELK4
hsa-mir-379-3p	GLO1
hsa-mir-379-3p	UBE2K
hsa-mir-379-3p	HOXA10
hsa-mir-379-3p	FOXN2
hsa-mir-379-3p	IGFBP5
hsa-mir-379-3p	INSIG1
hsa-mir-379-3p	NRF1
hsa-mir-379-3p	PMAIP1
hsa-mir-379-3p	PPP2R1B
hsa-mir-379-3p	PTGS2
hsa-mir-379-3p	RAP1B
hsa-mir-379-3p	SKP1
hsa-mir-379-3p	SYPL1
hsa-mir-379-3p	TFDP1
hsa-mir-379-3p	THBS1
hsa-mir-379-3p	TJP1
hsa-mir-379-3p	SHOC2
hsa-mir-379-3p	FXR1
hsa-mir-379-3p	FZD6
hsa-mir-379-3p	HIST1H3H
hsa-mir-379-3p	DYRK2
hsa-mir-379-3p	SOCS1
hsa-mir-379-3p	ROCK2
hsa-mir-379-3p	COL4A3BP
hsa-mir-379-3p	SCML2
hsa-mir-379-3p	RABAC1
hsa-mir-379-3p	CD226
hsa-mir-379-3p	GNA13
hsa-mir-379-3p	ZNF460
hsa-mir-379-3p	ZNF652
hsa-mir-379-3p	SAMD4A
hsa-mir-379-3p	HIC2
hsa-mir-379-3p	OTUD3
hsa-mir-379-3p	BRD4
hsa-mir-379-3p	ATRNL1
hsa-mir-379-3p	ARRDC2
hsa-mir-379-3p	MMADHC
hsa-mir-379-3p	TUBD1
hsa-mir-379-3p	RSL24D1
hsa-mir-379-3p	AZIN1
hsa-mir-379-3p	ERRFI1
hsa-mir-379-3p	GIN1
hsa-mir-379-3p	FBXW7
hsa-mir-379-3p	FEM1A
hsa-mir-379-3p	C8orf4
hsa-mir-379-3p	ACTR3B
hsa-mir-379-3p	SH3TC2
hsa-mir-379-3p	ALG9
hsa-mir-379-3p	SIKE1
hsa-mir-379-3p	RAB11FIP1
hsa-mir-379-3p	NETO2
hsa-mir-379-3p	FSD1L
hsa-mir-379-3p	FYTTD1
hsa-mir-379-3p	CCDC74A
hsa-mir-379-3p	CCDC74B
hsa-mir-379-3p	NXPE3
hsa-mir-379-3p	LENG9
hsa-mir-379-3p	FNIP1
hsa-mir-379-3p	MYL12B
hsa-mir-379-3p	C5orf24
hsa-mir-379-3p	PM20D2
hsa-mir-379-3p	SPTY2D1
hsa-mir-379-3p	MIPOL1
hsa-mir-379-3p	SPRED1
hsa-mir-379-3p	PGBD4
hsa-mir-379-3p	ZNF449
hsa-mir-379-3p	JAZF1
hsa-mir-379-3p	RNF144B
hsa-mir-379-3p	SGMS1
hsa-mir-379-3p	NUDT7
hsa-mir-379-3p	PTAR1
hsa-mir-379-3p	NOTCH2NL
hsa-mir-379-3p	ACBD7
hsa-mir-379-3p	ACTR3C
hsa-mir-379-3p	FAM182B
hsa-mir-379-3p	COMMD3-BMI1
hsa-mir-379-3p	ADM
hsa-mir-379-3p	TJP1
hsa-mir-379-3p	BRD4
hsa-mir-379-3p	RAB11FIP1
hsa-mir-379-3p	CRY1
hsa-mir-379-3p	RORA
hsa-mir-379-3p	ALDH3A2
hsa-mir-379-3p	ST13
hsa-mir-379-3p	TMEM33
hsa-mir-379-3p	TRIM2
hsa-mir-379-3p	RSRC2
hsa-mir-379-3p	MGP
hsa-mir-379-3p	GLS
hsa-mir-379-3p	DNAJC16
hsa-mir-379-3p	RHOQ
hsa-mir-379-3p	ETF1
hsa-mir-379-3p	CANX
hsa-mir-379-3p	CANX
hsa-mir-379-3p	RAB3IP
hsa-mir-379-3p	COX7B
hsa-mir-379-3p	MAP1B
hsa-mir-379-3p	AGO4
hsa-mir-379-3p	EGLN1
hsa-mir-379-3p	YME1L1
hsa-mir-379-3p	ENPP2
hsa-mir-379-3p	LRRC1
hsa-mir-379-3p	GLCE
hsa-mir-379-3p	COPS4
hsa-mir-379-3p	ETNK1
hsa-mir-379-3p	IGF1R
hsa-mir-379-3p	RHOB
hsa-mir-379-3p	PHLDB2
hsa-mir-379-3p	SCG5
hsa-mir-379-3p	SCG5
hsa-mir-379-3p	SCG5
hsa-mir-379-3p	PRPF8
hsa-mir-379-3p	PRPF8
hsa-mir-379-3p	TMEM50A
hsa-mir-379-3p	CHP1
hsa-mir-379-3p	ZNF789

## Sheet: 454
hsa-mir-454-3p	ACVR1
hsa-mir-454-3p	ADARB2
hsa-mir-454-3p	PARP1
hsa-mir-454-3p	ABCD2
hsa-mir-454-3p	XIAP
hsa-mir-454-3p	ARHGAP1
hsa-mir-454-3p	ARSA
hsa-mir-454-3p	ATP6V1B2
hsa-mir-454-3p	ATP6V1C1
hsa-mir-454-3p	BMP3
hsa-mir-454-3p	BTG1
hsa-mir-454-3p	CALM2
hsa-mir-454-3p	CCNA2
hsa-mir-454-3p	CCND2
hsa-mir-454-3p	CCT6A
hsa-mir-454-3p	CDK4
hsa-mir-454-3p	CFL2
hsa-mir-454-3p	CLCN3
hsa-mir-454-3p	TPP1
hsa-mir-454-3p	CCR6
hsa-mir-454-3p	KLF6
hsa-mir-454-3p	SLC31A1
hsa-mir-454-3p	COX10
hsa-mir-454-3p	CSNK2A1
hsa-mir-454-3p	DAD1
hsa-mir-454-3p	DAPK1
hsa-mir-454-3p	DDX6
hsa-mir-454-3p	DYNC1LI2
hsa-mir-454-3p	DPYSL2
hsa-mir-454-3p	EDN1
hsa-mir-454-3p	EREG
hsa-mir-454-3p	ESR1
hsa-mir-454-3p	F2RL1
hsa-mir-454-3p	ACSL4
hsa-mir-454-3p	FKTN
hsa-mir-454-3p	FLNC
hsa-mir-454-3p	G6PC
hsa-mir-454-3p	GMFB
hsa-mir-454-3p	GP2
hsa-mir-454-3p	GRB10
hsa-mir-454-3p	GRSF1
hsa-mir-454-3p	HADHB
hsa-mir-454-3p	HOXA5
hsa-mir-454-3p	HOXB3
hsa-mir-454-3p	HOXD11
hsa-mir-454-3p	HPRT1
hsa-mir-454-3p	HSPA8
hsa-mir-454-3p	IGF2R
hsa-mir-454-3p	IGFBP5
hsa-mir-454-3p	IRF1
hsa-mir-454-3p	JARID2
hsa-mir-454-3p	KCNB1
hsa-mir-454-3p	KLRD1
hsa-mir-454-3p	LDLR
hsa-mir-454-3p	LIPA
hsa-mir-454-3p	SMAD4
hsa-mir-454-3p	MBNL1
hsa-mir-454-3p	MCC
hsa-mir-454-3p	MAP3K9
hsa-mir-454-3p	MOCS2
hsa-mir-454-3p	TRIM37
hsa-mir-454-3p	MYH11
hsa-mir-454-3p	NARS
hsa-mir-454-3p	NF2
hsa-mir-454-3p	NFE2L1
hsa-mir-454-3p	NFIB
hsa-mir-454-3p	CNOT4
hsa-mir-454-3p	NPTX1
hsa-mir-454-3p	OMD
hsa-mir-454-3p	ORC1
hsa-mir-454-3p	OSBP
hsa-mir-454-3p	PCSK6
hsa-mir-454-3p	PAFAH1B2
hsa-mir-454-3p	PEX13
hsa-mir-454-3p	PIGA
hsa-mir-454-3p	POLR2A
hsa-mir-454-3p	POLR2D
hsa-mir-454-3p	PPP1R7
hsa-mir-454-3p	PRKAA1
hsa-mir-454-3p	PRKCSH
hsa-mir-454-3p	MAPK1
hsa-mir-454-3p	PRNP
hsa-mir-454-3p	PSMB5
hsa-mir-454-3p	QSOX1
hsa-mir-454-3p	PTPN4
hsa-mir-454-3p	PTPRG
hsa-mir-454-3p	RAB5B
hsa-mir-454-3p	RAG1
hsa-mir-454-3p	RAN
hsa-mir-454-3p	RFC2
hsa-mir-454-3p	RFXAP
hsa-mir-454-3p	RPL4
hsa-mir-454-3p	RPS15A
hsa-mir-454-3p	RPS27A
hsa-mir-454-3p	CLIP1
hsa-mir-454-3p	MSMO1
hsa-mir-454-3p	CXCL12
hsa-mir-454-3p	SRSF2
hsa-mir-454-3p	SNTB1
hsa-mir-454-3p	SNTB2
hsa-mir-454-3p	SOX4
hsa-mir-454-3p	TROVE2
hsa-mir-454-3p	SSTR2
hsa-mir-454-3p	TCF7L2
hsa-mir-454-3p	TERF2
hsa-mir-454-3p	TGFBR2
hsa-mir-454-3p	THRA
hsa-mir-454-3p	TP53
hsa-mir-454-3p	TRPC3
hsa-mir-454-3p	UBB
hsa-mir-454-3p	UBC
hsa-mir-454-3p	UBE2D2
hsa-mir-454-3p	UBE2D3
hsa-mir-454-3p	UQCRB
hsa-mir-454-3p	YY1
hsa-mir-454-3p	ZNF711
hsa-mir-454-3p	ZNF12
hsa-mir-454-3p	ZNF24
hsa-mir-454-3p	ZNF154
hsa-mir-454-3p	ZNF224
hsa-mir-454-3p	FXR1
hsa-mir-454-3p	SLC10A3
hsa-mir-454-3p	FZD6
hsa-mir-454-3p	CUL3
hsa-mir-454-3p	IFITM1
hsa-mir-454-3p	MAPKAPK5
hsa-mir-454-3p	BHLHE40
hsa-mir-454-3p	STX16
hsa-mir-454-3p	GALNT4
hsa-mir-454-3p	TNFRSF10B
hsa-mir-454-3p	USP13
hsa-mir-454-3p	WASL
hsa-mir-454-3p	ATP6V0E1
hsa-mir-454-3p	GPRC5A
hsa-mir-454-3p	MAP7
hsa-mir-454-3p	ATP6V0D1
hsa-mir-454-3p	PRPF4
hsa-mir-454-3p	DLG5
hsa-mir-454-3p	RPS6KA5
hsa-mir-454-3p	S1PR2
hsa-mir-454-3p	PPIG
hsa-mir-454-3p	ZFYVE9
hsa-mir-454-3p	QKI
hsa-mir-454-3p	SECISBP2L
hsa-mir-454-3p	MLEC
hsa-mir-454-3p	CEP170
hsa-mir-454-3p	FIG4
hsa-mir-454-3p	KLHL21
hsa-mir-454-3p	NCAPD2
hsa-mir-454-3p	SEC16A
hsa-mir-454-3p	MED12
hsa-mir-454-3p	TSPAN3
hsa-mir-454-3p	STX6
hsa-mir-454-3p	POP7
hsa-mir-454-3p	CDK2AP2
hsa-mir-454-3p	SF3A1
hsa-mir-454-3p	DLC1
hsa-mir-454-3p	ZBTB18
hsa-mir-454-3p	SEC23B
hsa-mir-454-3p	CHERP
hsa-mir-454-3p	TXNIP
hsa-mir-454-3p	LEFTY1
hsa-mir-454-3p	SLC12A7
hsa-mir-454-3p	BLCAP
hsa-mir-454-3p	GPR75
hsa-mir-454-3p	KDELR1
hsa-mir-454-3p	SERINC3
hsa-mir-454-3p	PNRC1
hsa-mir-454-3p	LILRA2
hsa-mir-454-3p	FGFR1OP
hsa-mir-454-3p	CHEK2
hsa-mir-454-3p	STK38
hsa-mir-454-3p	PPP6R1
hsa-mir-454-3p	ENPP4
hsa-mir-454-3p	BTBD3
hsa-mir-454-3p	MAPRE3
hsa-mir-454-3p	HABP4
hsa-mir-454-3p	ELL2
hsa-mir-454-3p	HMGXB3
hsa-mir-454-3p	CNOT1
hsa-mir-454-3p	CDK19
hsa-mir-454-3p	SPART
hsa-mir-454-3p	TNRC6B
hsa-mir-454-3p	POGZ
hsa-mir-454-3p	ARL6IP1
hsa-mir-454-3p	FBXO28
hsa-mir-454-3p	DTX4
hsa-mir-454-3p	RPRD2
hsa-mir-454-3p	OTUD3
hsa-mir-454-3p	CAMSAP2
hsa-mir-454-3p	POFUT2
hsa-mir-454-3p	ATMIN
hsa-mir-454-3p	SATB2
hsa-mir-454-3p	SIK3
hsa-mir-454-3p	DICER1
hsa-mir-454-3p	GPR161
hsa-mir-454-3p	ZFYVE26
hsa-mir-454-3p	SNAPIN
hsa-mir-454-3p	UBBP4
hsa-mir-454-3p	TMEM2
hsa-mir-454-3p	CBY1
hsa-mir-454-3p	SUN2
hsa-mir-454-3p	DSTYK
hsa-mir-454-3p	CLIC4
hsa-mir-454-3p	LTN1
hsa-mir-454-3p	ARHGEF26
hsa-mir-454-3p	HBP1
hsa-mir-454-3p	RNF11
hsa-mir-454-3p	SNX5
hsa-mir-454-3p	SALL3
hsa-mir-454-3p	SIGLEC9
hsa-mir-454-3p	GPR82
hsa-mir-454-3p	TNRC6A
hsa-mir-454-3p	MYLIP
hsa-mir-454-3p	RACGAP1
hsa-mir-454-3p	TMOD3
hsa-mir-454-3p	PURG
hsa-mir-454-3p	NRBF2
hsa-mir-454-3p	ZBTB7B
hsa-mir-454-3p	RDH11
hsa-mir-454-3p	IER3IP1
hsa-mir-454-3p	RLIM
hsa-mir-454-3p	CERCAM
hsa-mir-454-3p	C3orf18
hsa-mir-454-3p	ACP6
hsa-mir-454-3p	PDZD11
hsa-mir-454-3p	MRPL37
hsa-mir-454-3p	ZBTB7A
hsa-mir-454-3p	NIP7
hsa-mir-454-3p	ZNF107
hsa-mir-454-3p	CINP
hsa-mir-454-3p	RAB14
hsa-mir-454-3p	CHIC1
hsa-mir-454-3p	BRWD1
hsa-mir-454-3p	SLC38A2
hsa-mir-454-3p	RBM27
hsa-mir-454-3p	TMCO1
hsa-mir-454-3p	MED18
hsa-mir-454-3p	PIGG
hsa-mir-454-3p	PXK
hsa-mir-454-3p	RNF125
hsa-mir-454-3p	CDCA4
hsa-mir-454-3p	AKIRIN2
hsa-mir-454-3p	LRRC8D
hsa-mir-454-3p	RBM23
hsa-mir-454-3p	UBR7
hsa-mir-454-3p	CEP55
hsa-mir-454-3p	C11orf57
hsa-mir-454-3p	PPP6R3
hsa-mir-454-3p	SLC35E3
hsa-mir-454-3p	DEPDC1
hsa-mir-454-3p	CHD7
hsa-mir-454-3p	MREG
hsa-mir-454-3p	ATF7IP
hsa-mir-454-3p	TMEM30A
hsa-mir-454-3p	MBNL3
hsa-mir-454-3p	ERBIN
hsa-mir-454-3p	MFF
hsa-mir-454-3p	KIAA1191
hsa-mir-454-3p	ANKRD50
hsa-mir-454-3p	CYP20A1
hsa-mir-454-3p	MAVS
hsa-mir-454-3p	PDP2
hsa-mir-454-3p	TAOK1
hsa-mir-454-3p	BAHCC1
hsa-mir-454-3p	PHF12
hsa-mir-454-3p	ZBTB4
hsa-mir-454-3p	ZNF317
hsa-mir-454-3p	ZNF529
hsa-mir-454-3p	RAP2C
hsa-mir-454-3p	MID1IP1
hsa-mir-454-3p	RRAGD
hsa-mir-454-3p	ENPP5
hsa-mir-454-3p	MRPS35
hsa-mir-454-3p	FAM217B
hsa-mir-454-3p	KIF13A
hsa-mir-454-3p	SMOC1
hsa-mir-454-3p	ABCG8
hsa-mir-454-3p	ZMAT3
hsa-mir-454-3p	NOM1
hsa-mir-454-3p	NABP1
hsa-mir-454-3p	RFX7
hsa-mir-454-3p	WNK3
hsa-mir-454-3p	CAPRIN2
hsa-mir-454-3p	GID4
hsa-mir-454-3p	PRRG4
hsa-mir-454-3p	GNPTAB
hsa-mir-454-3p	NKAP
hsa-mir-454-3p	PLEKHF2
hsa-mir-454-3p	VPS37B
hsa-mir-454-3p	KLHL36
hsa-mir-454-3p	CSPP1
hsa-mir-454-3p	ADM2
hsa-mir-454-3p	PLEKHS1
hsa-mir-454-3p	NAA50
hsa-mir-454-3p	RAB11FIP1
hsa-mir-454-3p	CXorf21
hsa-mir-454-3p	C16orf70
hsa-mir-454-3p	KLHL15
hsa-mir-454-3p	TET1
hsa-mir-454-3p	PDRG1
hsa-mir-454-3p	PLA2G12A
hsa-mir-454-3p	CDADC1
hsa-mir-454-3p	PPP1R14C
hsa-mir-454-3p	TMTC1
hsa-mir-454-3p	RAB34
hsa-mir-454-3p	KCTD10
hsa-mir-454-3p	KREMEN1
hsa-mir-454-3p	RPF2
hsa-mir-454-3p	POLR1B
hsa-mir-454-3p	LZIC
hsa-mir-454-3p	MSANTD4
hsa-mir-454-3p	USP32
hsa-mir-454-3p	MIGA2
hsa-mir-454-3p	PPP1R15B
hsa-mir-454-3p	MASTL
hsa-mir-454-3p	PRPF38A
hsa-mir-454-3p	ZIC5
hsa-mir-454-3p	TRIM4
hsa-mir-454-3p	LMLN
hsa-mir-454-3p	KBTBD6
hsa-mir-454-3p	C16orf45
hsa-mir-454-3p	STARD13
hsa-mir-454-3p	BTF3L4
hsa-mir-454-3p	ACBD5
hsa-mir-454-3p	RFT1
hsa-mir-454-3p	ASB16
hsa-mir-454-3p	TIMM50
hsa-mir-454-3p	FAM114A1
hsa-mir-454-3p	MMGT1
hsa-mir-454-3p	ARHGAP12
hsa-mir-454-3p	FOXQ1
hsa-mir-454-3p	EGLN3
hsa-mir-454-3p	MED8
hsa-mir-454-3p	SLC46A1
hsa-mir-454-3p	FLYWCH2
hsa-mir-454-3p	WDR31
hsa-mir-454-3p	KCTD12
hsa-mir-454-3p	NUS1
hsa-mir-454-3p	COX20
hsa-mir-454-3p	ZNF354B
hsa-mir-454-3p	ANKRD9
hsa-mir-454-3p	MRPL52
hsa-mir-454-3p	NIPA1
hsa-mir-454-3p	DCUN1D3
hsa-mir-454-3p	CYB5D1
hsa-mir-454-3p	TRIM71
hsa-mir-454-3p	DCBLD2
hsa-mir-454-3p	C4orf36
hsa-mir-454-3p	JMY
hsa-mir-454-3p	MTPN
hsa-mir-454-3p	VPS37A
hsa-mir-454-3p	NACC2
hsa-mir-454-3p	ROMO1
hsa-mir-454-3p	SAMD8
hsa-mir-454-3p	PTGR2
hsa-mir-454-3p	ODF4
hsa-mir-454-3p	RUNDC1
hsa-mir-454-3p	WIPF2
hsa-mir-454-3p	ZNF417
hsa-mir-454-3p	IL23R
hsa-mir-454-3p	SIK1
hsa-mir-454-3p	DUSP18
hsa-mir-454-3p	MB21D2
hsa-mir-454-3p	THAP6
hsa-mir-454-3p	SLC38A9
hsa-mir-454-3p	FAM120AOS
hsa-mir-454-3p	PRUNE2
hsa-mir-454-3p	IFNLR1
hsa-mir-454-3p	PAPD4
hsa-mir-454-3p	ZNF800
hsa-mir-454-3p	FUT11
hsa-mir-454-3p	ZNF431
hsa-mir-454-3p	SPTSSA
hsa-mir-454-3p	AGO3
hsa-mir-454-3p	IPMK
hsa-mir-454-3p	LCLAT1
hsa-mir-454-3p	ZNF620
hsa-mir-454-3p	UBN2
hsa-mir-454-3p	RBM20
hsa-mir-454-3p	RNF149
hsa-mir-454-3p	EOGT
hsa-mir-454-3p	METTL2A
hsa-mir-454-3p	CCDC137
hsa-mir-454-3p	ZNF678
hsa-mir-454-3p	SMTNL2
hsa-mir-454-3p	RBM43
hsa-mir-454-3p	C6orf120
hsa-mir-454-3p	CLEC12B
hsa-mir-454-3p	ZNF805
hsa-mir-454-3p	ZBTB8A
hsa-mir-454-3p	SFTPA1
hsa-mir-454-3p	SLC35E2B
hsa-mir-454-3p	PRR23A
hsa-mir-454-3p	ARL17B
hsa-mir-454-3p	POC1B-GALNT4
hsa-mir-454-3p	ARHGAP1
hsa-mir-454-3p	ATP6V1B2
hsa-mir-454-3p	BTG1
hsa-mir-454-3p	CALM2
hsa-mir-454-3p	TPP1
hsa-mir-454-3p	DDX6
hsa-mir-454-3p	EDN1
hsa-mir-454-3p	ACSL4
hsa-mir-454-3p	FKTN
hsa-mir-454-3p	GMFB
hsa-mir-454-3p	GP2
hsa-mir-454-3p	HADHB
hsa-mir-454-3p	HOXA5
hsa-mir-454-3p	HOXB3
hsa-mir-454-3p	HPRT1
hsa-mir-454-3p	HSPA8
hsa-mir-454-3p	IGFBP5
hsa-mir-454-3p	IRF1
hsa-mir-454-3p	JARID2
hsa-mir-454-3p	LDLR
hsa-mir-454-3p	LIPA
hsa-mir-454-3p	SMAD4
hsa-mir-454-3p	MBNL1
hsa-mir-454-3p	MAP3K9
hsa-mir-454-3p	CNOT4
hsa-mir-454-3p	NPTX1
hsa-mir-454-3p	OSBP
hsa-mir-454-3p	PRKAA1
hsa-mir-454-3p	RAB5B
hsa-mir-454-3p	RAN
hsa-mir-454-3p	CLIP1
hsa-mir-454-3p	MSMO1
hsa-mir-454-3p	CXCL12
hsa-mir-454-3p	SOX4
hsa-mir-454-3p	UBB
hsa-mir-454-3p	UBC
hsa-mir-454-3p	UQCRB
hsa-mir-454-3p	ZNF12
hsa-mir-454-3p	ZNF24
hsa-mir-454-3p	ZNF224
hsa-mir-454-3p	FXR1
hsa-mir-454-3p	FZD6
hsa-mir-454-3p	CUL3
hsa-mir-454-3p	BHLHE40
hsa-mir-454-3p	ATP6V0E1
hsa-mir-454-3p	MAP7
hsa-mir-454-3p	ZFYVE9
hsa-mir-454-3p	QKI
hsa-mir-454-3p	SECISBP2L
hsa-mir-454-3p	TSPAN3
hsa-mir-454-3p	STX6
hsa-mir-454-3p	POP7
hsa-mir-454-3p	SEC23B
hsa-mir-454-3p	CHERP
hsa-mir-454-3p	TXNIP
hsa-mir-454-3p	BLCAP
hsa-mir-454-3p	SERINC3
hsa-mir-454-3p	STK38
hsa-mir-454-3p	PPP6R1
hsa-mir-454-3p	BTBD3
hsa-mir-454-3p	CNOT1
hsa-mir-454-3p	TNRC6B
hsa-mir-454-3p	ARL6IP1
hsa-mir-454-3p	FBXO28
hsa-mir-454-3p	OTUD3
hsa-mir-454-3p	DICER1
hsa-mir-454-3p	SNAPIN
hsa-mir-454-3p	CBY1
hsa-mir-454-3p	CLIC4
hsa-mir-454-3p	LTN1
hsa-mir-454-3p	ARHGEF26
hsa-mir-454-3p	HBP1
hsa-mir-454-3p	RNF11
hsa-mir-454-3p	SNX5
hsa-mir-454-3p	TNRC6A
hsa-mir-454-3p	TMOD3
hsa-mir-454-3p	ZBTB7B
hsa-mir-454-3p	RDH11
hsa-mir-454-3p	RLIM
hsa-mir-454-3p	PDZD11
hsa-mir-454-3p	MRPL37
hsa-mir-454-3p	ZBTB7A
hsa-mir-454-3p	RAB14
hsa-mir-454-3p	BRWD1
hsa-mir-454-3p	SLC38A2
hsa-mir-454-3p	PXK
hsa-mir-454-3p	AKIRIN2
hsa-mir-454-3p	UBR7
hsa-mir-454-3p	DEPDC1
hsa-mir-454-3p	MREG
hsa-mir-454-3p	TMEM30A
hsa-mir-454-3p	MBNL3
hsa-mir-454-3p	ANKRD50
hsa-mir-454-3p	TAOK1
hsa-mir-454-3p	ZBTB4
hsa-mir-454-3p	RAP2C
hsa-mir-454-3p	RRAGD
hsa-mir-454-3p	ENPP5
hsa-mir-454-3p	ZMAT3
hsa-mir-454-3p	NABP1
hsa-mir-454-3p	RFX7
hsa-mir-454-3p	PLEKHF2
hsa-mir-454-3p	C16orf70
hsa-mir-454-3p	KLHL15
hsa-mir-454-3p	PDRG1
hsa-mir-454-3p	KCTD10
hsa-mir-454-3p	PPP1R15B
hsa-mir-454-3p	BTF3L4
hsa-mir-454-3p	ACBD5
hsa-mir-454-3p	DCUN1D3
hsa-mir-454-3p	JMY
hsa-mir-454-3p	VPS37A
hsa-mir-454-3p	NACC2
hsa-mir-454-3p	SAMD8
hsa-mir-454-3p	RUNDC1
hsa-mir-454-3p	WIPF2
hsa-mir-454-3p	MB21D2
hsa-mir-454-3p	PRUNE2
hsa-mir-454-3p	ZNF800
hsa-mir-454-3p	ZNF431
hsa-mir-454-3p	SPTSSA
hsa-mir-454-3p	LCLAT1
hsa-mir-454-3p	EOGT
hsa-mir-454-3p	CCDC137
hsa-mir-454-3p	ZNF678
hsa-mir-454-3p	ANKIB1
hsa-mir-454-3p	KRIT1
hsa-mir-454-3p	KRIT1
hsa-mir-454-3p	M6PR
hsa-mir-454-3p	SKAP2
hsa-mir-454-3p	KIAA0100
hsa-mir-454-3p	UBE3C
hsa-mir-454-3p	MAP4K5
hsa-mir-454-3p	CAPN1
hsa-mir-454-3p	ATP2C1
hsa-mir-454-3p	RUNX3
hsa-mir-454-3p	CPS1
hsa-mir-454-3p	ERP44
hsa-mir-454-3p	AKAP11
hsa-mir-454-3p	PHF20
hsa-mir-454-3p	VEZT
hsa-mir-454-3p	TBPL1
hsa-mir-454-3p	TIMP2
hsa-mir-454-3p	MAT2B
hsa-mir-454-3p	TRIO
hsa-mir-454-3p	MED17
hsa-mir-454-3p	ARAP2
hsa-mir-454-3p	VPS13D
hsa-mir-454-3p	FAM120A
hsa-mir-454-3p	VAMP3
hsa-mir-454-3p	HERPUD1
hsa-mir-454-3p	PIK3CB
hsa-mir-454-3p	ARID4B
hsa-mir-454-3p	PLEKHH1
hsa-mir-454-3p	KMT2C
hsa-mir-454-3p	RC3H2
hsa-mir-454-3p	ATP11B
hsa-mir-454-3p	CTDP1
hsa-mir-454-3p	CTDP1
hsa-mir-454-3p	WNK1
hsa-mir-454-3p	QSER1
hsa-mir-454-3p	BCAT1
hsa-mir-454-3p	NCKAP1
hsa-mir-454-3p	GPBP1
hsa-mir-454-3p	ZNF275
hsa-mir-454-3p	RNF4
hsa-mir-454-3p	ST3GAL6
hsa-mir-454-3p	HIPK2
hsa-mir-454-3p	MTHFD2
hsa-mir-454-3p	NFYC
hsa-mir-454-3p	ASPM
hsa-mir-454-3p	ATXN3
hsa-mir-454-3p	ZFAT
hsa-mir-454-3p	DDX3Y
hsa-mir-454-3p	NEO1
hsa-mir-454-3p	CBFB
hsa-mir-454-3p	ATP11A
hsa-mir-454-3p	NUCKS1
hsa-mir-454-3p	VPS35
hsa-mir-454-3p	TGFBR3
hsa-mir-454-3p	MAPK6
hsa-mir-454-3p	LRP6
hsa-mir-454-3p	LRP6
hsa-mir-454-3p	EXOC5
hsa-mir-454-3p	MGAT4A
hsa-mir-454-3p	WDR1
hsa-mir-454-3p	SCARB1
hsa-mir-454-3p	PDE8A
hsa-mir-454-3p	CA12
hsa-mir-454-3p	DPP8
hsa-mir-454-3p	EIF4G3
hsa-mir-454-3p	GRAMD4
hsa-mir-454-3p	SLC25A3
hsa-mir-454-3p	FOSL2
hsa-mir-454-3p	KLHL20
hsa-mir-454-3p	JADE1
hsa-mir-454-3p	UBE2K
hsa-mir-454-3p	MLLT10
hsa-mir-454-3p	TNS1
hsa-mir-454-3p	DNM2
hsa-mir-454-3p	CLDND1
hsa-mir-454-3p	PCNP
hsa-mir-454-3p	CADPS2
hsa-mir-454-3p	FAM135A
hsa-mir-454-3p	ULK2
hsa-mir-454-3p	TNPO1
hsa-mir-454-3p	EIF3I
hsa-mir-454-3p	RAB10
hsa-mir-454-3p	HADHA
hsa-mir-454-3p	WDR47
hsa-mir-454-3p	ATG16L1
hsa-mir-454-3p	ATG16L1
hsa-mir-454-3p	DNAJA1
hsa-mir-454-3p	NFX1
hsa-mir-454-3p	EIF2AK1
hsa-mir-454-3p	HUWE1
hsa-mir-454-3p	PIGS
hsa-mir-454-3p	CRLS1
hsa-mir-454-3p	PAPOLA
hsa-mir-454-3p	ZNF268
hsa-mir-454-3p	OSBPL8
hsa-mir-454-3p	CDV3
hsa-mir-454-3p	SUPT16H
hsa-mir-454-3p	TRPM7
hsa-mir-454-3p	BAMBI
hsa-mir-454-3p	WAC
hsa-mir-454-3p	CDC5L
hsa-mir-454-3p	CDC7
hsa-mir-454-3p	NRP1
hsa-mir-454-3p	CCDC134
hsa-mir-454-3p	DDX17
hsa-mir-454-3p	ZBED4
hsa-mir-454-3p	DAAM1
hsa-mir-454-3p	ITPK1
hsa-mir-454-3p	ITPK1
hsa-mir-454-3p	PABPN1
hsa-mir-454-3p	STK4
hsa-mir-454-3p	ADNP
hsa-mir-454-3p	MANBAL
hsa-mir-454-3p	MAPRE1
hsa-mir-454-3p	E2F1
hsa-mir-454-3p	FAM83D
hsa-mir-454-3p	RBBP8
hsa-mir-454-3p	ALG13
hsa-mir-454-3p	AMMECR1
hsa-mir-454-3p	ATP11C
hsa-mir-454-3p	FMR1
hsa-mir-454-3p	FNDC3A
hsa-mir-454-3p	DGKH
hsa-mir-454-3p	TSC22D1
hsa-mir-454-3p	LONP2
hsa-mir-454-3p	N4BP1
hsa-mir-454-3p	USP31
hsa-mir-454-3p	UBE2W
hsa-mir-454-3p	UBR5
hsa-mir-454-3p	MTMR9
hsa-mir-454-3p	MTMR9
hsa-mir-454-3p	ASF1B
hsa-mir-454-3p	ASF1B
hsa-mir-454-3p	MYH14
hsa-mir-454-3p	PIK3R2
hsa-mir-454-3p	AVL9
hsa-mir-454-3p	ITGB8
hsa-mir-454-3p	CAV2
hsa-mir-454-3p	MET
hsa-mir-454-3p	LMBR1
hsa-mir-454-3p	IMPDH1
hsa-mir-454-3p	URGCP
hsa-mir-454-3p	FSD1L
hsa-mir-454-3p	TBC1D13
hsa-mir-454-3p	TNKS2
hsa-mir-454-3p	CPEB3
hsa-mir-454-3p	LARP4B
hsa-mir-454-3p	NUFIP2
hsa-mir-454-3p	MTMR4
hsa-mir-454-3p	SMARCD2
hsa-mir-454-3p	DDX5
hsa-mir-454-3p	LUC7L3
hsa-mir-454-3p	TBC1D9
hsa-mir-454-3p	KLF3
hsa-mir-454-3p	UGDH
hsa-mir-454-3p	DCPS
hsa-mir-454-3p	EIF4G2
hsa-mir-454-3p	UBE4A
hsa-mir-454-3p	HIPK3
hsa-mir-454-3p	SLC1A2
hsa-mir-454-3p	PRDM4
hsa-mir-454-3p	NAA25
hsa-mir-454-3p	OAS3
hsa-mir-454-3p	CAND1
hsa-mir-454-3p	LDHB
hsa-mir-454-3p	HCFC2
hsa-mir-454-3p	C2CD5
hsa-mir-454-3p	RNGTT
hsa-mir-454-3p	KCTD20
hsa-mir-454-3p	ICK
hsa-mir-454-3p	ZNF451
hsa-mir-454-3p	PTP4A1
hsa-mir-454-3p	C6orf62
hsa-mir-454-3p	SOBP
hsa-mir-454-3p	CUTA
hsa-mir-454-3p	CUTA
hsa-mir-454-3p	HMGCS1
hsa-mir-454-3p	CNOT6
hsa-mir-454-3p	TRIM23
hsa-mir-454-3p	SMAD5
hsa-mir-454-3p	CSNK1A1
hsa-mir-454-3p	STC2
hsa-mir-454-3p	CPEB4
hsa-mir-454-3p	SMC4
hsa-mir-454-3p	SLC41A3
hsa-mir-454-3p	ACVR2B
hsa-mir-454-3p	PIKFYVE
hsa-mir-454-3p	TANC1
hsa-mir-454-3p	KDM3A
hsa-mir-454-3p	CHMP3
hsa-mir-454-3p	SLC9A2
hsa-mir-454-3p	BIRC6
hsa-mir-454-3p	SUMO1
hsa-mir-454-3p	EPHA4
hsa-mir-454-3p	SCP2
hsa-mir-454-3p	ASH1L
hsa-mir-454-3p	NID1
hsa-mir-454-3p	APH1A
hsa-mir-454-3p	PRDX6
hsa-mir-454-3p	RPA2
hsa-mir-454-3p	KMT2A
hsa-mir-454-3p	KIF14
hsa-mir-454-3p	KLF7
hsa-mir-454-3p	SLC16A7
hsa-mir-454-3p	FAM47E-STBD1
hsa-mir-454-3p	RAB3GAP2
hsa-mir-454-3p	GDA
hsa-mir-454-3p	RAD23B
hsa-mir-454-3p	VPS4B
hsa-mir-454-3p	RBM25
hsa-mir-454-3p	FAM98A
hsa-mir-454-3p	LGALSL
hsa-mir-454-3p	PANK3
hsa-mir-454-3p	EPC1
hsa-mir-454-3p	TARDBP
hsa-mir-454-3p	LYPLA1
hsa-mir-454-3p	UBL3
hsa-mir-454-3p	OCRL
hsa-mir-454-3p	RBBP6
hsa-mir-454-3p	ZNF644
hsa-mir-454-3p	ZMIZ2
hsa-mir-454-3p	ARL4A
hsa-mir-454-3p	LPGAT1
hsa-mir-454-3p	G0S2
hsa-mir-454-3p	ACSL3
hsa-mir-454-3p	SDC4
hsa-mir-454-3p	VAPB
hsa-mir-454-3p	ZNFX1
hsa-mir-454-3p	PMEPA1
hsa-mir-454-3p	RNF114
hsa-mir-454-3p	CDKN1A
hsa-mir-454-3p	RREB1
hsa-mir-454-3p	SLC2A4RG
hsa-mir-454-3p	TRAP1
hsa-mir-454-3p	HELB
hsa-mir-454-3p	RAB3IP
hsa-mir-454-3p	SLC35E1
hsa-mir-454-3p	MACF1
hsa-mir-454-3p	NDUFA5
hsa-mir-454-3p	HOXD1
hsa-mir-454-3p	DUT
hsa-mir-454-3p	CLN6
hsa-mir-454-3p	MBD4
hsa-mir-454-3p	BCL2L2
hsa-mir-454-3p	PHF10
hsa-mir-454-3p	SH3BP4
hsa-mir-454-3p	KIF1A
hsa-mir-454-3p	TULP4
hsa-mir-454-3p	ZSWIM6
hsa-mir-454-3p	ATXN10
hsa-mir-454-3p	ZNF337
hsa-mir-454-3p	TRIM28
hsa-mir-454-3p	SESN2
hsa-mir-454-3p	SESN2
hsa-mir-454-3p	MRPS25
hsa-mir-454-3p	SLC6A6
hsa-mir-454-3p	EXOC4
hsa-mir-454-3p	DHX30
hsa-mir-454-3p	EFR3A
hsa-mir-454-3p	PTCD3
hsa-mir-454-3p	IMMT
hsa-mir-454-3p	UBE2G1
hsa-mir-454-3p	SEC61G
hsa-mir-454-3p	SNAP25
hsa-mir-454-3p	XPO4
hsa-mir-454-3p	SCO1
hsa-mir-454-3p	SLC41A1
hsa-mir-454-3p	WDR74
hsa-mir-454-3p	RTN3
hsa-mir-454-3p	SBF2
hsa-mir-454-3p	CCNB1
hsa-mir-454-3p	VHL
hsa-mir-454-3p	NOTCH2
hsa-mir-454-3p	PPHLN1
hsa-mir-454-3p	IL6ST
hsa-mir-454-3p	AGO4
hsa-mir-454-3p	DSC2
hsa-mir-454-3p	NREP
hsa-mir-454-3p	NAA35
hsa-mir-454-3p	TES
hsa-mir-454-3p	MDFIC
hsa-mir-454-3p	SYNCRIP
hsa-mir-454-3p	TROAP
hsa-mir-454-3p	LAMC1
hsa-mir-454-3p	EIF4E2
hsa-mir-454-3p	EPC2
hsa-mir-454-3p	ITM2B
hsa-mir-454-3p	KDELR2
hsa-mir-454-3p	ZDHHC4
hsa-mir-454-3p	SRSF1
hsa-mir-454-3p	VEZF1
hsa-mir-454-3p	SKIL
hsa-mir-454-3p	KCTD3
hsa-mir-454-3p	ENPP2
hsa-mir-454-3p	RNF38
hsa-mir-454-3p	CPEB2
hsa-mir-454-3p	CPEB2
hsa-mir-454-3p	RDX
hsa-mir-454-3p	RAB1A
hsa-mir-454-3p	ATRAID
hsa-mir-454-3p	OLA1
hsa-mir-454-3p	UBL7
hsa-mir-454-3p	UBL7
hsa-mir-454-3p	G3BP2
hsa-mir-454-3p	CCNG2
hsa-mir-454-3p	PPP3CA
hsa-mir-454-3p	FBN2
hsa-mir-454-3p	TMBIM6
hsa-mir-454-3p	ANKRD52
hsa-mir-454-3p	SLAIN1
hsa-mir-454-3p	NCOA2
hsa-mir-454-3p	IGF1R
hsa-mir-454-3p	USP3
hsa-mir-454-3p	POLG
hsa-mir-454-3p	SEC11A
hsa-mir-454-3p	CDH11
hsa-mir-454-3p	ZCCHC14
hsa-mir-454-3p	NCOR1
hsa-mir-454-3p	RPS11
hsa-mir-454-3p	KIAA0319L
hsa-mir-454-3p	MCL1
hsa-mir-454-3p	CDC42BPA
hsa-mir-454-3p	VPS54
hsa-mir-454-3p	SLC20A1
hsa-mir-454-3p	VGLL4
hsa-mir-454-3p	FEM1C
hsa-mir-454-3p	G3BP1
hsa-mir-454-3p	RNF44
hsa-mir-454-3p	CREB5
hsa-mir-454-3p	EGFR
hsa-mir-454-3p	TMEM168
hsa-mir-454-3p	MFHAS1
hsa-mir-454-3p	MFHAS1
hsa-mir-454-3p	SYBU
hsa-mir-454-3p	FBXO10
hsa-mir-454-3p	FBXO10
hsa-mir-454-3p	ZEB1
hsa-mir-454-3p	EIF4EBP2
hsa-mir-454-3p	NPAT
hsa-mir-454-3p	ALDOA
hsa-mir-454-3p	HMGA2
hsa-mir-454-3p	ARID5B
hsa-mir-454-3p	ASAP2
hsa-mir-454-3p	EPG5
hsa-mir-454-3p	PSTPIP2
hsa-mir-454-3p	C18orf25
hsa-mir-454-3p	TGOLN2
hsa-mir-454-3p	UHMK1
hsa-mir-454-3p	PAN3
hsa-mir-454-3p	NADK2
hsa-mir-454-3p	SAR1B
hsa-mir-454-3p	PLOD2
hsa-mir-454-3p	BCL2L11
hsa-mir-454-3p	ASAP1
hsa-mir-454-3p	DDAH1
hsa-mir-454-3p	TBCEL
hsa-mir-454-3p	LONRF1
hsa-mir-454-3p	LONRF1
hsa-mir-454-3p	TRIM11
hsa-mir-454-3p	MIER3
hsa-mir-454-3p	KIF5A
hsa-mir-454-3p	MAPK13
hsa-mir-454-3p	BUB1B
hsa-mir-454-3p	EIF5B
hsa-mir-454-3p	B4GALT5
hsa-mir-454-3p	SPATA2
hsa-mir-454-3p	STC1
hsa-mir-454-3p	AGPAT3
hsa-mir-454-3p	MAML1
hsa-mir-454-3p	MAML1
hsa-mir-454-3p	SHANK2
hsa-mir-454-3p	NFIA
hsa-mir-454-3p	AGL
hsa-mir-454-3p	BROX
hsa-mir-454-3p	CNST
hsa-mir-454-3p	WDR26
hsa-mir-454-3p	SMARCAD1
hsa-mir-454-3p	FSTL1
hsa-mir-454-3p	ARPC2
hsa-mir-454-3p	CDS1
hsa-mir-454-3p	SMIM14
hsa-mir-454-3p	RPP14
hsa-mir-454-3p	RCHY1
hsa-mir-454-3p	RPN1
hsa-mir-454-3p	OTUD4
hsa-mir-454-3p	EDIL3
hsa-mir-454-3p	LMTK2
hsa-mir-454-3p	FASTK
hsa-mir-454-3p	FOXK1
hsa-mir-454-3p	TP53INP1
hsa-mir-454-3p	ZHX1
hsa-mir-454-3p	VCP
hsa-mir-454-3p	SUGT1
hsa-mir-454-3p	SKA3
hsa-mir-454-3p	TSC1
hsa-mir-454-3p	E2F7
hsa-mir-454-3p	PTER
hsa-mir-454-3p	BAG5
hsa-mir-454-3p	CUL5
hsa-mir-454-3p	MCM7
hsa-mir-454-3p	ZNF3
hsa-mir-454-3p	NDEL1
hsa-mir-454-3p	AP1G1
hsa-mir-454-3p	IGF2
hsa-mir-454-3p	KMT2D
hsa-mir-454-3p	SRRM2
hsa-mir-454-3p	STAT3
hsa-mir-454-3p	TET2
hsa-mir-454-3p	TSPAN5
hsa-mir-454-3p	FSTL5
hsa-mir-454-3p	CEP120
hsa-mir-454-3p	UQCRFS1
hsa-mir-454-3p	AR
hsa-mir-454-3p	CCDC126
hsa-mir-454-3p	USP47
hsa-mir-454-3p	RALGAPB
hsa-mir-454-3p	PFKFB3
hsa-mir-454-3p	ATF7
hsa-mir-454-3p	SOCS6
hsa-mir-454-3p	FEZ2
hsa-mir-454-3p	ZNF692
hsa-mir-454-3p	CLCN5
hsa-mir-454-3p	DSEL
hsa-mir-454-3p	DSEL
hsa-mir-454-3p	ZNF562
hsa-mir-454-3p	CAMTA1
hsa-mir-454-3p	ZNF217
hsa-mir-454-3p	DCP2
hsa-mir-454-3p	ZNF680
hsa-mir-454-3p	KDM2A
hsa-mir-454-3p	VANGL1
hsa-mir-454-3p	TNKS
hsa-mir-454-3p	TNKS
hsa-mir-454-3p	TRIB1
hsa-mir-454-3p	FKBP2
hsa-mir-454-3p	FKBP2
hsa-mir-454-3p	RNF213
hsa-mir-454-3p	DPY19L1
hsa-mir-454-3p	CBX2
hsa-mir-454-3p	LIG4
hsa-mir-454-3p	MSL2
hsa-mir-454-3p	UGT8
hsa-mir-454-3p	PDIK1L
hsa-mir-454-3p	CKAP5
hsa-mir-454-3p	EIF3F
hsa-mir-454-3p	EIF3F
hsa-mir-454-3p	LONRF3
hsa-mir-454-3p	FOSL1
hsa-mir-454-3p	BNIP3
hsa-mir-454-3p	RNPEP
hsa-mir-454-3p	MYO1D
hsa-mir-454-3p	CDK5R1
hsa-mir-454-3p	SMCR8
hsa-mir-454-3p	SMCR8
hsa-mir-454-3p	CHD9
hsa-mir-454-3p	ZBTB38
hsa-mir-454-3p	NR2C2
hsa-mir-454-3p	TBL1XR1
hsa-mir-454-3p	ARL6IP6
hsa-mir-454-3p	NDUFV2
hsa-mir-454-3p	CSRNP3
hsa-mir-454-3p	FBXO34
hsa-mir-454-3p	KLHL28
hsa-mir-454-3p	SERTAD2
hsa-mir-454-3p	DCTPP1
hsa-mir-454-3p	TSHZ1
hsa-mir-454-3p	SKIDA1
hsa-mir-454-3p	ZNF594
hsa-mir-454-3p	PCGF5
hsa-mir-454-3p	TMEM64
hsa-mir-454-3p	MUC16
hsa-mir-454-3p	RNF41
hsa-mir-454-3p	LDOC1
hsa-mir-454-3p	TTC3
hsa-mir-454-3p	IQGAP3
hsa-mir-454-3p	UQCR10
hsa-mir-454-3p	ARMCX2
hsa-mir-454-3p	PURA
hsa-mir-454-3p	PRMT3
hsa-mir-454-3p	SP1
hsa-mir-454-3p	MYBL1
hsa-mir-454-3p	ANKFY1
hsa-mir-454-3p	KCNQ5
hsa-mir-454-3p	BICD2
hsa-mir-454-3p	POLR1D
hsa-mir-454-3p	NAP1L1
hsa-mir-454-3p	SESTD1
hsa-mir-454-3p	ZC3H6
hsa-mir-454-3p	TUBB4B
hsa-mir-454-3p	PTAR1
hsa-mir-454-3p	MSL1
hsa-mir-454-3p	ZNF292
hsa-mir-454-3p	ZNF567
hsa-mir-454-3p	MAOA
hsa-mir-454-3p	TSPYL1
hsa-mir-454-3p	IL1RAP
hsa-mir-454-3p	ACADSB
hsa-mir-454-3p	ZBTB44
hsa-mir-454-3p	TSC22D2
hsa-mir-454-3p	TCF4
hsa-mir-454-3p	STRN3
hsa-mir-454-3p	SRGAP1
hsa-mir-454-3p	ZSCAN25
hsa-mir-454-3p	DDI2
hsa-mir-454-3p	MYO5A
hsa-mir-454-3p	PSAP
hsa-mir-454-3p	MIER1
hsa-mir-454-3p	HELZ
hsa-mir-454-3p	MDM4
hsa-mir-454-3p	FOXJ3
hsa-mir-454-3p	PNMA5
hsa-mir-454-3p	DZIP3
hsa-mir-454-3p	RORB
hsa-mir-454-3p	PPP1R10
hsa-mir-454-3p	PPP1R10
hsa-mir-454-3p	PPP1R10
hsa-mir-454-3p	PPP1R10
hsa-mir-454-3p	PPP1R10
hsa-mir-454-3p	PPP1R10
hsa-mir-454-3p	PPP1R10
hsa-mir-454-3p	FAM216A
hsa-mir-454-3p	RAB12
hsa-mir-454-3p	SFT2D2
hsa-mir-454-3p	S1PR3
hsa-mir-454-3p	RPS29
hsa-mir-454-3p	RNF103
hsa-mir-454-3p	WBP1
hsa-mir-454-3p	ARPC1A
hsa-mir-454-3p	PEG10
hsa-mir-454-3p	GATC
hsa-mir-454-3p	GAN
hsa-mir-454-3p	DYNLL2
hsa-mir-454-3p	TIMM23
hsa-mir-454-3p	ZNF850
hsa-mir-454-3p	NDUFA7
hsa-mir-454-3p	NBPF14
hsa-mir-454-3p	C2orf15
hsa-mir-454-3p	MLLT6
hsa-mir-454-3p	MLLT6
hsa-mir-454-5p	AK2
hsa-mir-454-5p	ALDOA
hsa-mir-454-5p	ALDOC
hsa-mir-454-5p	ANG
hsa-mir-454-5p	ARSB
hsa-mir-454-5p	ASGR1
hsa-mir-454-5p	RCAN1
hsa-mir-454-5p	EFNA5
hsa-mir-454-5p	FRK
hsa-mir-454-5p	HOXD9
hsa-mir-454-5p	HSF2
hsa-mir-454-5p	IL5
hsa-mir-454-5p	KCNJ10
hsa-mir-454-5p	LTBR
hsa-mir-454-5p	DDR2
hsa-mir-454-5p	MAPK1
hsa-mir-454-5p	PTK6
hsa-mir-454-5p	RAP1B
hsa-mir-454-5p	ATXN1
hsa-mir-454-5p	CCL16
hsa-mir-454-5p	SNRPD3
hsa-mir-454-5p	TMPO
hsa-mir-454-5p	WEE1
hsa-mir-454-5p	CNBP
hsa-mir-454-5p	AP3B2
hsa-mir-454-5p	MINPP1
hsa-mir-454-5p	PAN2
hsa-mir-454-5p	TRIM10
hsa-mir-454-5p	ARL4C
hsa-mir-454-5p	KLF2
hsa-mir-454-5p	DDX17
hsa-mir-454-5p	NUDT21
hsa-mir-454-5p	ZWINT
hsa-mir-454-5p	DUSP10
hsa-mir-454-5p	CEP152
hsa-mir-454-5p	GIGYF2
hsa-mir-454-5p	LSM14A
hsa-mir-454-5p	USP25
hsa-mir-454-5p	UCHL5
hsa-mir-454-5p	KDM3B
hsa-mir-454-5p	IPO9
hsa-mir-454-5p	LMBR1L
hsa-mir-454-5p	RNF20
hsa-mir-454-5p	SERTAD4
hsa-mir-454-5p	CRAMP1
hsa-mir-454-5p	PLEKHA1
hsa-mir-454-5p	PHACTR4
hsa-mir-454-5p	ZSCAN16
hsa-mir-454-5p	TNKS2
hsa-mir-454-5p	TANGO2
hsa-mir-454-5p	LDHD
hsa-mir-454-5p	UBN2
hsa-mir-454-5p	BCLAF3
hsa-mir-454-5p	RABL3
hsa-mir-454-5p	ZNF660
hsa-mir-454-5p	FOXL2NB
hsa-mir-454-5p	MINOS1
hsa-mir-454-5p	BCL2L15
hsa-mir-454-5p	SHISA9
hsa-mir-454-5p	MAPK1
hsa-mir-454-5p	NDUFS1
hsa-mir-454-5p	NDUFS1
hsa-mir-454-5p	TAB2
hsa-mir-454-5p	TAB2
hsa-mir-454-5p	SPHK2
hsa-mir-454-5p	AHRR
hsa-mir-454-5p	GNAI3
hsa-mir-454-5p	PKN2
hsa-mir-454-5p	RRP15
hsa-mir-454-5p	ATP1B3
hsa-mir-454-5p	ALDH3A2
hsa-mir-454-5p	CYLD
hsa-mir-454-5p	STARD7
hsa-mir-454-5p	SH3BP2
hsa-mir-454-5p	PPP2R3C
hsa-mir-454-5p	TNRC6B
hsa-mir-454-5p	ACIN1
hsa-mir-454-5p	CDK5RAP1
hsa-mir-454-5p	PIM2
hsa-mir-454-5p	USP11
hsa-mir-454-5p	EIF3E
hsa-mir-454-5p	EIF3A
hsa-mir-454-5p	NUFIP2
hsa-mir-454-5p	PMP22
hsa-mir-454-5p	CCND1
hsa-mir-454-5p	OAS3
hsa-mir-454-5p	SLC38A1
hsa-mir-454-5p	VNN1
hsa-mir-454-5p	LIFR
hsa-mir-454-5p	EHHADH
hsa-mir-454-5p	TFG
hsa-mir-454-5p	BIRC6
hsa-mir-454-5p	WDR34
hsa-mir-454-5p	FAM98A
hsa-mir-454-5p	PCMT1
hsa-mir-454-5p	UTP20
hsa-mir-454-5p	EBPL
hsa-mir-454-5p	PPP1R12C
hsa-mir-454-5p	PHF10
hsa-mir-454-5p	SESN2
hsa-mir-454-5p	SESN2
hsa-mir-454-5p	RLIM
hsa-mir-454-5p	ANKHD1
hsa-mir-454-5p	ACTR10
hsa-mir-454-5p	ENPP2
hsa-mir-454-5p	RNF38
hsa-mir-454-5p	SLC39A6
hsa-mir-454-5p	FKBP10
hsa-mir-454-5p	INTS3
hsa-mir-454-5p	INTS3
hsa-mir-454-5p	PURB
hsa-mir-454-5p	OGT
hsa-mir-454-5p	LIN7C
hsa-mir-454-5p	ACAD8
hsa-mir-454-5p	TRIM11
hsa-mir-454-5p	FBXL18
hsa-mir-454-5p	AZIN1
hsa-mir-454-5p	ZKSCAN2
hsa-mir-454-5p	UBR1
hsa-mir-454-5p	TAOK1
hsa-mir-454-5p	CMPK1
hsa-mir-454-5p	DNAJB4
hsa-mir-454-5p	DHX57
hsa-mir-454-5p	LMBRD2
hsa-mir-454-5p	ANKRA2
hsa-mir-454-5p	TMUB1
hsa-mir-454-5p	FBXO33
hsa-mir-454-5p	PCF11
hsa-mir-454-5p	SERTAD3
hsa-mir-454-5p	FEM1B
hsa-mir-454-5p	SLC25A6
hsa-mir-454-5p	YWHAG
hsa-mir-454-5p	LONRF2
hsa-mir-454-5p	NPTX1
hsa-mir-454-5p	RPL38
hsa-mir-454-5p	RGMB
hsa-mir-454-5p	FAM91A1
hsa-mir-454-5p	SAMD12
hsa-mir-454-5p	EHMT1
hsa-mir-454-5p	POLR2A
hsa-mir-454-5p	POLR2A
hsa-mir-454-5p	BCOR
hsa-mir-454-5p	ZNRF3
hsa-mir-454-5p	COA3
hsa-mir-454-5p	PTCH1
hsa-mir-454-5p	PPP1CC
hsa-mir-454-5p	INSIG1
hsa-mir-454-5p	TET3
hsa-mir-454-5p	SLC39A10
hsa-mir-454-5p	PSAP
hsa-mir-454-5p	GFPT1
hsa-mir-454-5p	ZNF277
hsa-mir-454-5p	STK38L
hsa-mir-454-5p	TMEM242
hsa-mir-454-5p	APOL6
hsa-mir-454-5p	ANKRD66
hsa-mir-454-5p	TXNIP
hsa-mir-454-5p	MARCKS

## Sheet: 493
hsa-mir-493-3p	ACTB
hsa-mir-493-3p	ALDOA
hsa-mir-493-3p	RHOC
hsa-mir-493-3p	ARHGAP5
hsa-mir-493-3p	KIF1A
hsa-mir-493-3p	CALM1
hsa-mir-493-3p	DDB1
hsa-mir-493-3p	EIF4A1
hsa-mir-493-3p	GNB1
hsa-mir-493-3p	HNRNPU
hsa-mir-493-3p	HSPA4
hsa-mir-493-3p	IARS
hsa-mir-493-3p	KCNJ4
hsa-mir-493-3p	LGALS3BP
hsa-mir-493-3p	LIFR
hsa-mir-493-3p	MAP2
hsa-mir-493-3p	MXI1
hsa-mir-493-3p	NFATC3
hsa-mir-493-3p	NKX6-1
hsa-mir-493-3p	PAWR
hsa-mir-493-3p	PPP1CC
hsa-mir-493-3p	PRKCH
hsa-mir-493-3p	MAP2K7
hsa-mir-493-3p	PSMD7
hsa-mir-493-3p	PEX2
hsa-mir-493-3p	RAD51
hsa-mir-493-3p	TRIM27
hsa-mir-493-3p	RPL3
hsa-mir-493-3p	SIAH2
hsa-mir-493-3p	SKP1
hsa-mir-493-3p	SP100
hsa-mir-493-3p	UBE2D3
hsa-mir-493-3p	VLDLR
hsa-mir-493-3p	YWHAZ
hsa-mir-493-3p	CSDE1
hsa-mir-493-3p	SLC7A5
hsa-mir-493-3p	FZD4
hsa-mir-493-3p	PEA15
hsa-mir-493-3p	BTRC
hsa-mir-493-3p	XPR1
hsa-mir-493-3p	SRSF11
hsa-mir-493-3p	KCNB2
hsa-mir-493-3p	PDE4DIP
hsa-mir-493-3p	DAZAP2
hsa-mir-493-3p	SMG7
hsa-mir-493-3p	HS3ST1
hsa-mir-493-3p	CITED2
hsa-mir-493-3p	CRTAP
hsa-mir-493-3p	CELF1
hsa-mir-493-3p	TMED10
hsa-mir-493-3p	RAB31
hsa-mir-493-3p	ABHD2
hsa-mir-493-3p	NXPH3
hsa-mir-493-3p	COPG1
hsa-mir-493-3p	ZNF507
hsa-mir-493-3p	DKK1
hsa-mir-493-3p	MYCBP2
hsa-mir-493-3p	ZCCHC14
hsa-mir-493-3p	SSBP2
hsa-mir-493-3p	PLXNB2
hsa-mir-493-3p	CLIC4
hsa-mir-493-3p	RTL8A
hsa-mir-493-3p	ASAP1
hsa-mir-493-3p	SH3GLB1
hsa-mir-493-3p	GOLPH3L
hsa-mir-493-3p	FEM1A
hsa-mir-493-3p	VPS35
hsa-mir-493-3p	CNDP2
hsa-mir-493-3p	NKRF
hsa-mir-493-3p	ATP10D
hsa-mir-493-3p	CBX8
hsa-mir-493-3p	TRIB3
hsa-mir-493-3p	TMEM109
hsa-mir-493-3p	PPP1R3B
hsa-mir-493-3p	BRIP1
hsa-mir-493-3p	MAP3K21
hsa-mir-493-3p	LMNB2
hsa-mir-493-3p	ZNF670
hsa-mir-493-3p	ZNF689
hsa-mir-493-3p	FOXP4
hsa-mir-493-3p	SLC43A2
hsa-mir-493-3p	AADACL3
hsa-mir-493-3p	ZNF645
hsa-mir-493-3p	DENND5B
hsa-mir-493-3p	ZNF678
hsa-mir-493-3p	FMN1
hsa-mir-493-3p	WDR82P1
hsa-mir-493-3p	SYCE1L
hsa-mir-493-3p	DDB1
hsa-mir-493-3p	GNB1
hsa-mir-493-3p	PRKCH
hsa-mir-493-3p	RPL3
hsa-mir-493-3p	KCNB2
hsa-mir-493-3p	ZNF507
hsa-mir-493-3p	DKK1
hsa-mir-493-3p	PLXNB2
hsa-mir-493-3p	CYB561
hsa-mir-493-3p	UBE3C
hsa-mir-493-3p	KDM5D
hsa-mir-493-3p	STRAP
hsa-mir-493-3p	CD44
hsa-mir-493-3p	TIMP2
hsa-mir-493-3p	TBC1D23
hsa-mir-493-3p	TRIO
hsa-mir-493-3p	CDH1
hsa-mir-493-3p	VAMP3
hsa-mir-493-3p	GINM1
hsa-mir-493-3p	PUM2
hsa-mir-493-3p	LAMC2
hsa-mir-493-3p	NCKAP1
hsa-mir-493-3p	KDM5A
hsa-mir-493-3p	NSF
hsa-mir-493-3p	NSF
hsa-mir-493-3p	NSF
hsa-mir-493-3p	ZNF638
hsa-mir-493-3p	FOSL2
hsa-mir-493-3p	FSCN1
hsa-mir-493-3p	IL4R
hsa-mir-493-3p	FGFR1
hsa-mir-493-3p	SRCAP
hsa-mir-493-3p	MTIF2
hsa-mir-493-3p	NID2
hsa-mir-493-3p	MLF2
hsa-mir-493-3p	CDV3
hsa-mir-493-3p	CCDC80
hsa-mir-493-3p	IKZF5
hsa-mir-493-3p	HSP90AB1
hsa-mir-493-3p	ABLIM1
hsa-mir-493-3p	TSPO
hsa-mir-493-3p	TNRC6B
hsa-mir-493-3p	ACIN1
hsa-mir-493-3p	HNF4A
hsa-mir-493-3p	JAG1
hsa-mir-493-3p	RAB2A
hsa-mir-493-3p	TNPO2
hsa-mir-493-3p	NAMPT
hsa-mir-493-3p	OGDH
hsa-mir-493-3p	PFN1
hsa-mir-493-3p	B9D1
hsa-mir-493-3p	TBC1D9
hsa-mir-493-3p	COL12A1
hsa-mir-493-3p	PTK7
hsa-mir-493-3p	HBEGF
hsa-mir-493-3p	SPARC
hsa-mir-493-3p	GNPDA1
hsa-mir-493-3p	IL1A
hsa-mir-493-3p	TFCP2L1
hsa-mir-493-3p	SPTBN1
hsa-mir-493-3p	MRPL19
hsa-mir-493-3p	LANCL1
hsa-mir-493-3p	FHL2
hsa-mir-493-3p	CEBPZ
hsa-mir-493-3p	TRAK2
hsa-mir-493-3p	CTSD
hsa-mir-493-3p	PHF3
hsa-mir-493-3p	PLAGL1
hsa-mir-493-3p	DUSP1
hsa-mir-493-3p	TNFRSF10B
hsa-mir-493-3p	USP9X
hsa-mir-493-3p	SH3TC1
hsa-mir-493-3p	GTF2F1
hsa-mir-493-3p	PCSK2
hsa-mir-493-3p	PRMT1
hsa-mir-493-3p	CANX
hsa-mir-493-3p	CANX
hsa-mir-493-3p	HELB
hsa-mir-493-3p	UBR4
hsa-mir-493-3p	PEX1
hsa-mir-493-3p	ATF4
hsa-mir-493-3p	LIF
hsa-mir-493-3p	ARPP19
hsa-mir-493-3p	ARPC1B
hsa-mir-493-3p	COL5A1
hsa-mir-493-3p	SYNE1
hsa-mir-493-3p	RPA1
hsa-mir-493-3p	FLOT2
hsa-mir-493-3p	CASP9
hsa-mir-493-3p	SRRM1
hsa-mir-493-3p	BHLHE40
hsa-mir-493-3p	KRT7
hsa-mir-493-3p	KDELR2
hsa-mir-493-3p	ITGAV
hsa-mir-493-3p	SEMA7A
hsa-mir-493-3p	SEMA7A
hsa-mir-493-3p	FBN2
hsa-mir-493-3p	ESYT1
hsa-mir-493-3p	SETD1B
hsa-mir-493-3p	IQGAP1
hsa-mir-493-3p	IGFBP4
hsa-mir-493-3p	SLC20A1
hsa-mir-493-3p	CSRNP1
hsa-mir-493-3p	LPP
hsa-mir-493-3p	PDGFC
hsa-mir-493-3p	RPL37
hsa-mir-493-3p	RMND5B
hsa-mir-493-3p	NONO
hsa-mir-493-3p	BIN3
hsa-mir-493-3p	ZNF462
hsa-mir-493-3p	SURF6
hsa-mir-493-3p	SURF6
hsa-mir-493-3p	UBC
hsa-mir-493-3p	CCDC50
hsa-mir-493-3p	HHEX
hsa-mir-493-3p	ADAMTS1
hsa-mir-493-3p	TTN
hsa-mir-493-3p	RRAGA
hsa-mir-493-3p	SKI
hsa-mir-493-3p	C1R
hsa-mir-493-3p	C1R
hsa-mir-493-3p	NDUFV3
hsa-mir-493-3p	FUBP1
hsa-mir-493-3p	VCAM1
hsa-mir-493-3p	DDR2
hsa-mir-493-3p	WDFY3
hsa-mir-493-3p	ICE1
hsa-mir-493-3p	TNFRSF11B
hsa-mir-493-3p	TPP1
hsa-mir-493-3p	ANPEP
hsa-mir-493-3p	SMAD3
hsa-mir-493-3p	NT5DC2
hsa-mir-493-3p	MAT2A
hsa-mir-493-3p	ZFPM2
hsa-mir-493-3p	UBB
hsa-mir-493-3p	PFKFB3
hsa-mir-493-3p	KIF5B
hsa-mir-493-3p	AKAP13
hsa-mir-493-3p	HAS2
hsa-mir-493-3p	ZNF217
hsa-mir-493-3p	JMJD1C
hsa-mir-493-3p	STOX2
hsa-mir-493-3p	RNF26
hsa-mir-493-3p	HSPB7
hsa-mir-493-3p	JUN
hsa-mir-493-3p	COX14
hsa-mir-493-3p	ZNF609
hsa-mir-493-3p	PAPPA
hsa-mir-493-3p	TMPRSS2
hsa-mir-493-3p	PRPF39
hsa-mir-493-3p	ZFP36L1
hsa-mir-493-3p	BICD2
hsa-mir-493-3p	THBS2
hsa-mir-493-3p	LYPD6
hsa-mir-493-3p	TUBB4B
hsa-mir-493-3p	TUBB
hsa-mir-493-3p	TUBB
hsa-mir-493-3p	TUBB
hsa-mir-493-3p	TUBB
hsa-mir-493-3p	TUBB
hsa-mir-493-3p	TUBB
hsa-mir-493-3p	TUBB
hsa-mir-493-3p	TUBB
hsa-mir-493-3p	NCOR2
hsa-mir-493-3p	MME
hsa-mir-493-3p	AP2A1
hsa-mir-493-3p	LRP10
hsa-mir-493-3p	TUBB3
hsa-mir-493-3p	TSN
hsa-mir-493-3p	CSNK1E
hsa-mir-493-3p	ZBED1
hsa-mir-493-3p	HNRNPUL2
hsa-mir-493-3p	ZNF717
hsa-mir-493-3p	PRKDC
hsa-mir-493-3p	RPS10-NUDT3
hsa-mir-493-3p	MYO19
hsa-mir-493-3p	MYO19
hsa-mir-493-5p	ACTB
hsa-mir-493-5p	RHOC
hsa-mir-493-5p	ARHGAP5
hsa-mir-493-5p	ATP7A
hsa-mir-493-5p	BDH1
hsa-mir-493-5p	CALM2
hsa-mir-493-5p	CDKN1A
hsa-mir-493-5p	CKS2
hsa-mir-493-5p	CTGF
hsa-mir-493-5p	EIF2B1
hsa-mir-493-5p	FHL2
hsa-mir-493-5p	FOXL1
hsa-mir-493-5p	FOS
hsa-mir-493-5p	FUT4
hsa-mir-493-5p	GNAT1
hsa-mir-493-5p	GRIK3
hsa-mir-493-5p	GTF2H1
hsa-mir-493-5p	IL12RB2
hsa-mir-493-5p	JAG2
hsa-mir-493-5p	KCNJ6
hsa-mir-493-5p	L1CAM
hsa-mir-493-5p	DNAJB9
hsa-mir-493-5p	MT2A
hsa-mir-493-5p	MYO10
hsa-mir-493-5p	NCL
hsa-mir-493-5p	NDUFS1
hsa-mir-493-5p	OLR1
hsa-mir-493-5p	PCSK1
hsa-mir-493-5p	PDPK1
hsa-mir-493-5p	CDK14
hsa-mir-493-5p	PTPRF
hsa-mir-493-5p	RAB5C
hsa-mir-493-5p	RAD23B
hsa-mir-493-5p	RPS3
hsa-mir-493-5p	SCD
hsa-mir-493-5p	TRA2B
hsa-mir-493-5p	SP4
hsa-mir-493-5p	SYT4
hsa-mir-493-5p	TDG
hsa-mir-493-5p	UBE2G1
hsa-mir-493-5p	PCGF2
hsa-mir-493-5p	VEZF1
hsa-mir-493-5p	EVI5
hsa-mir-493-5p	HMGA2
hsa-mir-493-5p	SMARCA5
hsa-mir-493-5p	HAT1
hsa-mir-493-5p	SLC25A12
hsa-mir-493-5p	HIP1R
hsa-mir-493-5p	MAP7
hsa-mir-493-5p	USP2
hsa-mir-493-5p	SMC3
hsa-mir-493-5p	TBRG4
hsa-mir-493-5p	HMGN3
hsa-mir-493-5p	SOCS5
hsa-mir-493-5p	JADE3
hsa-mir-493-5p	TBC1D5
hsa-mir-493-5p	TSC22D2
hsa-mir-493-5p	HMGXB4
hsa-mir-493-5p	SCAMP2
hsa-mir-493-5p	LHFPL6
hsa-mir-493-5p	TRIM13
hsa-mir-493-5p	PCGF3
hsa-mir-493-5p	CITED2
hsa-mir-493-5p	ANP32B
hsa-mir-493-5p	SRSF10
hsa-mir-493-5p	WDR3
hsa-mir-493-5p	NUDT3
hsa-mir-493-5p	RPH3A
hsa-mir-493-5p	RAB21
hsa-mir-493-5p	PRRC2C
hsa-mir-493-5p	AGTPBP1
hsa-mir-493-5p	TRIM2
hsa-mir-493-5p	SLC44A1
hsa-mir-493-5p	SF3B1
hsa-mir-493-5p	CES3
hsa-mir-493-5p	CHMP2B
hsa-mir-493-5p	LSM14A
hsa-mir-493-5p	RTL8A
hsa-mir-493-5p	FBXL3
hsa-mir-493-5p	SULT1B1
hsa-mir-493-5p	GOLM1
hsa-mir-493-5p	WAC
hsa-mir-493-5p	ZNF107
hsa-mir-493-5p	SARAF
hsa-mir-493-5p	RSF1
hsa-mir-493-5p	MRPS21
hsa-mir-493-5p	RBM23
hsa-mir-493-5p	DEPDC1
hsa-mir-493-5p	MBNL3
hsa-mir-493-5p	ZMIZ1
hsa-mir-493-5p	USP28
hsa-mir-493-5p	ZDBF2
hsa-mir-493-5p	DDX55
hsa-mir-493-5p	C12orf49
hsa-mir-493-5p	GEMIN6
hsa-mir-493-5p	STN1
hsa-mir-493-5p	KLHL15
hsa-mir-493-5p	CFHR5
hsa-mir-493-5p	LMNB2
hsa-mir-493-5p	USMG5
hsa-mir-493-5p	FNIP1
hsa-mir-493-5p	EFHC1
hsa-mir-493-5p	PWWP2A
hsa-mir-493-5p	TOP1MT
hsa-mir-493-5p	RAB3IP
hsa-mir-493-5p	ZDHHC15
hsa-mir-493-5p	ZNF550
hsa-mir-493-5p	EPHX4
hsa-mir-493-5p	ANKRD52
hsa-mir-493-5p	TMPRSS12
hsa-mir-493-5p	SPOPL
hsa-mir-493-5p	FREM2
hsa-mir-493-5p	GPR141
hsa-mir-493-5p	C16orf52
hsa-mir-493-5p	MTRNR2L2
hsa-mir-493-5p	MT2A
hsa-mir-493-5p	TRIM2
hsa-mir-493-5p	ZMIZ1
hsa-mir-493-5p	CYTH3
hsa-mir-493-5p	ADAM22
hsa-mir-493-5p	DYRK4
hsa-mir-493-5p	RB1CC1
hsa-mir-493-5p	POU2F2
hsa-mir-493-5p	NUP160
hsa-mir-493-5p	NUP160
hsa-mir-493-5p	VPS13D
hsa-mir-493-5p	ATP2B4
hsa-mir-493-5p	ELMO2
hsa-mir-493-5p	NTN1
hsa-mir-493-5p	PSME4
hsa-mir-493-5p	MAST4
hsa-mir-493-5p	RORA
hsa-mir-493-5p	MAPK6
hsa-mir-493-5p	PFN2
hsa-mir-493-5p	DGCR2
hsa-mir-493-5p	WIPI1
hsa-mir-493-5p	AFF4
hsa-mir-493-5p	FBXW11
hsa-mir-493-5p	FNDC3B
hsa-mir-493-5p	HSP90AA1
hsa-mir-493-5p	RNF13
hsa-mir-493-5p	ZNF264
hsa-mir-493-5p	WBP11
hsa-mir-493-5p	NCOA1
hsa-mir-493-5p	MYH9
hsa-mir-493-5p	PLS3
hsa-mir-493-5p	USP11
hsa-mir-493-5p	EIF3J
hsa-mir-493-5p	FZD3
hsa-mir-493-5p	RAB2A
hsa-mir-493-5p	GTPBP10
hsa-mir-493-5p	GRB10
hsa-mir-493-5p	TMEM245
hsa-mir-493-5p	CTSC
hsa-mir-493-5p	PPFIBP1
hsa-mir-493-5p	HSPA9
hsa-mir-493-5p	WNT5A
hsa-mir-493-5p	MEF2D
hsa-mir-493-5p	NID1
hsa-mir-493-5p	HSPH1
hsa-mir-493-5p	TNFRSF10B
hsa-mir-493-5p	ZNF644
hsa-mir-493-5p	CALD1
hsa-mir-493-5p	RASSF8
hsa-mir-493-5p	LRRFIP1
hsa-mir-493-5p	LDLR
hsa-mir-493-5p	SNX9
hsa-mir-493-5p	NDUFA10
hsa-mir-493-5p	NDUFA10
hsa-mir-493-5p	CHSY1
hsa-mir-493-5p	ATP13A3
hsa-mir-493-5p	SLC38A2
hsa-mir-493-5p	STT3A
hsa-mir-493-5p	SERPINE2
hsa-mir-493-5p	DRAM1
hsa-mir-493-5p	RAC1
hsa-mir-493-5p	THBS1
hsa-mir-493-5p	SCAF11
hsa-mir-493-5p	FRMD6
hsa-mir-493-5p	FGF7
hsa-mir-493-5p	ALDH9A1
hsa-mir-493-5p	MCL1
hsa-mir-493-5p	MBOAT2
hsa-mir-493-5p	EXOC6B
hsa-mir-493-5p	LRIG1
hsa-mir-493-5p	LRIG1
hsa-mir-493-5p	KLHL8
hsa-mir-493-5p	TNFAIP8
hsa-mir-493-5p	TMEM181
hsa-mir-493-5p	DIAPH2
hsa-mir-493-5p	NDUFB9
hsa-mir-493-5p	MTA2
hsa-mir-493-5p	PDCD4
hsa-mir-493-5p	EPS8
hsa-mir-493-5p	USP12
hsa-mir-493-5p	PANK1
hsa-mir-493-5p	TRAPPC8
hsa-mir-493-5p	PID1
hsa-mir-493-5p	MIER3
hsa-mir-493-5p	NPTN
hsa-mir-493-5p	CLDN12
hsa-mir-493-5p	ZNF281
hsa-mir-493-5p	ICE1
hsa-mir-493-5p	INTS1
hsa-mir-493-5p	PIGA
hsa-mir-493-5p	ZNF367
hsa-mir-493-5p	OTUD1
hsa-mir-493-5p	FBN1
hsa-mir-493-5p	SEC11C
hsa-mir-493-5p	SLFN5
hsa-mir-493-5p	CLPX
hsa-mir-493-5p	IGF2
hsa-mir-493-5p	SPINT2
hsa-mir-493-5p	SEMA4C
hsa-mir-493-5p	XPO6
hsa-mir-493-5p	SIN3A
hsa-mir-493-5p	CXCL8
hsa-mir-493-5p	CLIC4
hsa-mir-493-5p	HNRNPF
hsa-mir-493-5p	ROBO1
hsa-mir-493-5p	HAS2
hsa-mir-493-5p	ZNF217
hsa-mir-493-5p	CHD9
hsa-mir-493-5p	JUN
hsa-mir-493-5p	HNRNPA0
hsa-mir-493-5p	PRKRA
hsa-mir-493-5p	FGD6
hsa-mir-493-5p	GAS1
hsa-mir-493-5p	PITPNB
hsa-mir-493-5p	CLDN7
hsa-mir-493-5p	CLDN7
hsa-mir-493-5p	PCP4
hsa-mir-493-5p	BCOR
hsa-mir-493-5p	HGS
hsa-mir-493-5p	THBS2
hsa-mir-493-5p	LRRC8B
hsa-mir-493-5p	S100A6
hsa-mir-493-5p	GFPT1
hsa-mir-493-5p	CTNND1
hsa-mir-493-5p	IPO9
hsa-mir-493-5p	RANBP17
hsa-mir-493-5p	FASTKD5

## Sheet: 494
hsa-mir-494	PTEN
hsa-mir-494-3p	ACACA
hsa-mir-494-3p	AKT1
hsa-mir-494-3p	BIRC5
hsa-mir-494-3p	RHOB
hsa-mir-494-3p	ARHGAP5
hsa-mir-494-3p	ARNTL
hsa-mir-494-3p	ATF3
hsa-mir-494-3p	BAG1
hsa-mir-494-3p	CCND1
hsa-mir-494-3p	BCL2
hsa-mir-494-3p	BMI1
hsa-mir-494-3p	CDK6
hsa-mir-494-3p	CFTR
hsa-mir-494-3p	CNR1
hsa-mir-494-3p	SLC26A3
hsa-mir-494-3p	DSG2
hsa-mir-494-3p	EN2
hsa-mir-494-3p	ETF1
hsa-mir-494-3p	GCH1
hsa-mir-494-3p	GLO1
hsa-mir-494-3p	MKNK2
hsa-mir-494-3p	PDIA3
hsa-mir-494-3p	GTF2F1
hsa-mir-494-3p	HIF1A
hsa-mir-494-3p	HOXA10
hsa-mir-494-3p	IGF1R
hsa-mir-494-3p	IL1RAP
hsa-mir-494-3p	INSL4
hsa-mir-494-3p	ITPR1
hsa-mir-494-3p	MCC
hsa-mir-494-3p	MDM4
hsa-mir-494-3p	MYC
hsa-mir-494-3p	MYH2
hsa-mir-494-3p	NCL
hsa-mir-494-3p	NHS
hsa-mir-494-3p	PITX2
hsa-mir-494-3p	PPP1CC
hsa-mir-494-3p	PRKAA2
hsa-mir-494-3p	MAPK1
hsa-mir-494-3p	MAP2K1
hsa-mir-494-3p	PROS1
hsa-mir-494-3p	PTEN
hsa-mir-494-3p	PTPN12
hsa-mir-494-3p	PTPN14
hsa-mir-494-3p	RAB4A
hsa-mir-494-3p	RAD23B
hsa-mir-494-3p	RAP1B
hsa-mir-494-3p	RB1
hsa-mir-494-3p	REST
hsa-mir-494-3p	RGS16
hsa-mir-494-3p	RPS14
hsa-mir-494-3p	ATXN1
hsa-mir-494-3p	SDC1
hsa-mir-494-3p	SLC8A1
hsa-mir-494-3p	SSFA2
hsa-mir-494-3p	SS18
hsa-mir-494-3p	TBCA
hsa-mir-494-3p	ZEB1
hsa-mir-494-3p	TEAD1
hsa-mir-494-3p	TFAM
hsa-mir-494-3p	TFPI
hsa-mir-494-3p	UGT2B17
hsa-mir-494-3p	ZNF24
hsa-mir-494-3p	ZBTB25
hsa-mir-494-3p	EVI5
hsa-mir-494-3p	CXCR4
hsa-mir-494-3p	MLLT10
hsa-mir-494-3p	SHOC2
hsa-mir-494-3p	KMT2D
hsa-mir-494-3p	PABPN1
hsa-mir-494-3p	AGPS
hsa-mir-494-3p	MAPKAPK5
hsa-mir-494-3p	SLC25A12
hsa-mir-494-3p	CDS2
hsa-mir-494-3p	PEX11B
hsa-mir-494-3p	GTF3C4
hsa-mir-494-3p	DAZAP2
hsa-mir-494-3p	BCL2L11
hsa-mir-494-3p	DCAF7
hsa-mir-494-3p	BASP1
hsa-mir-494-3p	SYNCRIP
hsa-mir-494-3p	KIF2C
hsa-mir-494-3p	SUPT16H
hsa-mir-494-3p	FOXJ3
hsa-mir-494-3p	FNBP1
hsa-mir-494-3p	TMEFF2
hsa-mir-494-3p	LATS2
hsa-mir-494-3p	NPTN
hsa-mir-494-3p	SERP1
hsa-mir-494-3p	RNF115
hsa-mir-494-3p	TMOD3
hsa-mir-494-3p	ERO1A
hsa-mir-494-3p	HSD17B12
hsa-mir-494-3p	WNT16
hsa-mir-494-3p	CMPK1
hsa-mir-494-3p	TM6SF1
hsa-mir-494-3p	CYCS
hsa-mir-494-3p	MINDY2
hsa-mir-494-3p	RIF1
hsa-mir-494-3p	ZNF532
hsa-mir-494-3p	TMLHE
hsa-mir-494-3p	TRIM36
hsa-mir-494-3p	AJAP1
hsa-mir-494-3p	WDR45B
hsa-mir-494-3p	PCNP
hsa-mir-494-3p	RRAGD
hsa-mir-494-3p	PLEKHA3
hsa-mir-494-3p	ZBED2
hsa-mir-494-3p	FYCO1
hsa-mir-494-3p	CEP97
hsa-mir-494-3p	ARSJ
hsa-mir-494-3p	EFCAB1
hsa-mir-494-3p	ZSCAN16
hsa-mir-494-3p	MAP1LC3B
hsa-mir-494-3p	PRRC2B
hsa-mir-494-3p	GALP
hsa-mir-494-3p	CCDC149
hsa-mir-494-3p	ZC3HAV1L
hsa-mir-494-3p	ARHGAP12
hsa-mir-494-3p	ELFN2
hsa-mir-494-3p	INO80C
hsa-mir-494-3p	ZNF543
hsa-mir-494-3p	UHMK1
hsa-mir-494-3p	DCBLD2
hsa-mir-494-3p	DCAF4L2
hsa-mir-494-3p	C2CD4A
hsa-mir-494-3p	SAMD15
hsa-mir-494-3p	TMEM64
hsa-mir-494-3p	CC2D1B
hsa-mir-494-3p	CREG2
hsa-mir-494-3p	HNRNPA3
hsa-mir-494-3p	SPATA13
hsa-mir-494-3p	SMIM13
hsa-mir-494-3p	ZNF620
hsa-mir-494-3p	NPNT
hsa-mir-494-3p	EYS
hsa-mir-494-3p	ZNF736
hsa-mir-494-3p	TMEM178B
hsa-mir-494-3p	ACACA
hsa-mir-494-3p	AKT1
hsa-mir-494-3p	RHOB
hsa-mir-494-3p	ARHGAP5
hsa-mir-494-3p	BMI1
hsa-mir-494-3p	CDK6
hsa-mir-494-3p	CFTR
hsa-mir-494-3p	SLC26A3
hsa-mir-494-3p	DSG2
hsa-mir-494-3p	ETF1
hsa-mir-494-3p	GLO1
hsa-mir-494-3p	PDIA3
hsa-mir-494-3p	HIF1A
hsa-mir-494-3p	MYC
hsa-mir-494-3p	PPP1CC
hsa-mir-494-3p	MAPK1
hsa-mir-494-3p	PROS1
hsa-mir-494-3p	PTPN14
hsa-mir-494-3p	RAD23B
hsa-mir-494-3p	SDC1
hsa-mir-494-3p	ZEB1
hsa-mir-494-3p	CXCR4
hsa-mir-494-3p	GTF3C4
hsa-mir-494-3p	BCL2L11
hsa-mir-494-3p	BASP1
hsa-mir-494-3p	SYNCRIP
hsa-mir-494-3p	KIF2C
hsa-mir-494-3p	FOXJ3
hsa-mir-494-3p	NPTN
hsa-mir-494-3p	CYCS
hsa-mir-494-3p	TRIM36
hsa-mir-494-3p	PLEKHA3
hsa-mir-494-3p	ZC3HAV1L
hsa-mir-494-3p	UHMK1
hsa-mir-494-3p	DCBLD2
hsa-mir-494-3p	HNRNPA3
hsa-mir-494-3p	SMIM13
hsa-mir-494-3p	TSPAN6
hsa-mir-494-3p	DPM1
hsa-mir-494-3p	FUCA2
hsa-mir-494-3p	LAP3
hsa-mir-494-3p	SNX11
hsa-mir-494-3p	CFLAR
hsa-mir-494-3p	HCCS
hsa-mir-494-3p	ZFX
hsa-mir-494-3p	LAMP2
hsa-mir-494-3p	RALA
hsa-mir-494-3p	VPS41
hsa-mir-494-3p	ADIPOR2
hsa-mir-494-3p	ADIPOR2
hsa-mir-494-3p	MYLIP
hsa-mir-494-3p	PSMB1
hsa-mir-494-3p	PSMB1
hsa-mir-494-3p	SYPL1
hsa-mir-494-3p	SS18L2
hsa-mir-494-3p	ST3GAL1
hsa-mir-494-3p	ZNF207
hsa-mir-494-3p	PLAUR
hsa-mir-494-3p	UBR7
hsa-mir-494-3p	UBR7
hsa-mir-494-3p	PSMC4
hsa-mir-494-3p	PSMC4
hsa-mir-494-3p	SLC25A39
hsa-mir-494-3p	CLK1
hsa-mir-494-3p	CCDC88C
hsa-mir-494-3p	RALBP1
hsa-mir-494-3p	ZRANB1
hsa-mir-494-3p	RB1CC1
hsa-mir-494-3p	DEPDC1
hsa-mir-494-3p	FAS
hsa-mir-494-3p	TBPL1
hsa-mir-494-3p	BCLAF1
hsa-mir-494-3p	CHPF2
hsa-mir-494-3p	SLC4A7
hsa-mir-494-3p	RNF19A
hsa-mir-494-3p	FAM136A
hsa-mir-494-3p	VCL
hsa-mir-494-3p	TLL1
hsa-mir-494-3p	TDP1
hsa-mir-494-3p	WDR37
hsa-mir-494-3p	POLR2B
hsa-mir-494-3p	SCML1
hsa-mir-494-3p	GOPC
hsa-mir-494-3p	MRPS10
hsa-mir-494-3p	VAMP3
hsa-mir-494-3p	RCN1
hsa-mir-494-3p	CLPTM1L
hsa-mir-494-3p	CLPTM1L
hsa-mir-494-3p	HEXB
hsa-mir-494-3p	JKAMP
hsa-mir-494-3p	MCUR1
hsa-mir-494-3p	LETMD1
hsa-mir-494-3p	THOC3
hsa-mir-494-3p	PLEKHA5
hsa-mir-494-3p	ATP9A
hsa-mir-494-3p	NOP58
hsa-mir-494-3p	USP36
hsa-mir-494-3p	MRPL43
hsa-mir-494-3p	SEC61A1
hsa-mir-494-3p	UNKL
hsa-mir-494-3p	SLC2A3
hsa-mir-494-3p	CS
hsa-mir-494-3p	APPBP2
hsa-mir-494-3p	RNF4
hsa-mir-494-3p	TM7SF3
hsa-mir-494-3p	HIPK2
hsa-mir-494-3p	TNPO3
hsa-mir-494-3p	CNN2
hsa-mir-494-3p	OAT
hsa-mir-494-3p	TRAM2
hsa-mir-494-3p	PDIA5
hsa-mir-494-3p	YBX1
hsa-mir-494-3p	ELAVL1
hsa-mir-494-3p	IDI1
hsa-mir-494-3p	DHX29
hsa-mir-494-3p	FTSJ1
hsa-mir-494-3p	LAPTM4A
hsa-mir-494-3p	KIF2A
hsa-mir-494-3p	DNAJA2
hsa-mir-494-3p	TGFBR3
hsa-mir-494-3p	WIPI1
hsa-mir-494-3p	GBA2
hsa-mir-494-3p	ASNS
hsa-mir-494-3p	WDR1
hsa-mir-494-3p	TRIP13
hsa-mir-494-3p	ATP6AP1
hsa-mir-494-3p	CYBRD1
hsa-mir-494-3p	RHOBTB1
hsa-mir-494-3p	P4HA2
hsa-mir-494-3p	FBXW11
hsa-mir-494-3p	MCM2
hsa-mir-494-3p	EED
hsa-mir-494-3p	BCS1L
hsa-mir-494-3p	SRI
hsa-mir-494-3p	SEMA3C
hsa-mir-494-3p	ACTB
hsa-mir-494-3p	MOCOS
hsa-mir-494-3p	REXO2
hsa-mir-494-3p	SPAG5
hsa-mir-494-3p	DNAJC10
hsa-mir-494-3p	CAPZB
hsa-mir-494-3p	SLC25A43
hsa-mir-494-3p	UBE2A
hsa-mir-494-3p	FBLN1
hsa-mir-494-3p	PPP2R5C
hsa-mir-494-3p	EDN1
hsa-mir-494-3p	VDAC3
hsa-mir-494-3p	ITCH
hsa-mir-494-3p	XRCC5
hsa-mir-494-3p	CPOX
hsa-mir-494-3p	STK17B
hsa-mir-494-3p	DUSP12
hsa-mir-494-3p	GEMIN5
hsa-mir-494-3p	NFE2L1
hsa-mir-494-3p	TNPO1
hsa-mir-494-3p	STARD7
hsa-mir-494-3p	HADHA
hsa-mir-494-3p	TAF9
hsa-mir-494-3p	TAF9
hsa-mir-494-3p	CPNE3
hsa-mir-494-3p	ATG16L1
hsa-mir-494-3p	ATG16L1
hsa-mir-494-3p	B4GALT1
hsa-mir-494-3p	NFX1
hsa-mir-494-3p	DIMT1
hsa-mir-494-3p	IPO11
hsa-mir-494-3p	EPDR1
hsa-mir-494-3p	RBM22
hsa-mir-494-3p	ZFAND6
hsa-mir-494-3p	MMP2
hsa-mir-494-3p	DNM1L
hsa-mir-494-3p	PIR
hsa-mir-494-3p	KHSRP
hsa-mir-494-3p	ANKRD10
hsa-mir-494-3p	TGDS
hsa-mir-494-3p	FKBP1A
hsa-mir-494-3p	RPLP0
hsa-mir-494-3p	ERP29
hsa-mir-494-3p	DDX24
hsa-mir-494-3p	DDX24
hsa-mir-494-3p	NUDC
hsa-mir-494-3p	DNAJB11
hsa-mir-494-3p	TNRC6A
hsa-mir-494-3p	TNRC6A
hsa-mir-494-3p	CMTM6
hsa-mir-494-3p	ITGA6
hsa-mir-494-3p	SEL1L3
hsa-mir-494-3p	ZC3HC1
hsa-mir-494-3p	TMEM101
hsa-mir-494-3p	SCFD1
hsa-mir-494-3p	G2E3
hsa-mir-494-3p	GEMIN2
hsa-mir-494-3p	TRPM7
hsa-mir-494-3p	SNAP23
hsa-mir-494-3p	DPYSL2
hsa-mir-494-3p	CDC23
hsa-mir-494-3p	SUCO
hsa-mir-494-3p	ARCN1
hsa-mir-494-3p	PSMD5
hsa-mir-494-3p	WAC
hsa-mir-494-3p	ABL1
hsa-mir-494-3p	TMED1
hsa-mir-494-3p	CDC34
hsa-mir-494-3p	GADD45B
hsa-mir-494-3p	SLC25A1
hsa-mir-494-3p	EIF3L
hsa-mir-494-3p	KDELR3
hsa-mir-494-3p	DDX17
hsa-mir-494-3p	TCF20
hsa-mir-494-3p	TCF20
hsa-mir-494-3p	TCF20
hsa-mir-494-3p	TCF20
hsa-mir-494-3p	TCF20
hsa-mir-494-3p	TCF20
hsa-mir-494-3p	TCF20
hsa-mir-494-3p	TCF20
hsa-mir-494-3p	POLDIP3
hsa-mir-494-3p	CYB5R3
hsa-mir-494-3p	HMOX1
hsa-mir-494-3p	RBFOX2
hsa-mir-494-3p	RBFOX2
hsa-mir-494-3p	RBX1
hsa-mir-494-3p	CERK
hsa-mir-494-3p	RBM23
hsa-mir-494-3p	GNPNAT1
hsa-mir-494-3p	DDHD1
hsa-mir-494-3p	CDKN3
hsa-mir-494-3p	EIF5
hsa-mir-494-3p	VRK1
hsa-mir-494-3p	PSMC1
hsa-mir-494-3p	RPS6KA5
hsa-mir-494-3p	SRP54
hsa-mir-494-3p	TM9SF1
hsa-mir-494-3p	TM9SF1
hsa-mir-494-3p	SEC23A
hsa-mir-494-3p	MMP9
hsa-mir-494-3p	SALL4
hsa-mir-494-3p	PFDN4
hsa-mir-494-3p	CTSZ
hsa-mir-494-3p	TM9SF4
hsa-mir-494-3p	POFUT1
hsa-mir-494-3p	NOP56
hsa-mir-494-3p	MAPRE1
hsa-mir-494-3p	TTI1
hsa-mir-494-3p	E2F1
hsa-mir-494-3p	ADNP2
hsa-mir-494-3p	VAPA
hsa-mir-494-3p	PSMD10
hsa-mir-494-3p	TBL1X
hsa-mir-494-3p	PRPS2
hsa-mir-494-3p	ELF4
hsa-mir-494-3p	ARMCX3
hsa-mir-494-3p	FNDC3A
hsa-mir-494-3p	DNAJC3
hsa-mir-494-3p	TSC22D1
hsa-mir-494-3p	NUTF2
hsa-mir-494-3p	NUP93
hsa-mir-494-3p	ARL2BP
hsa-mir-494-3p	POLR2C
hsa-mir-494-3p	HSDL1
hsa-mir-494-3p	CLUAP1
hsa-mir-494-3p	GGA2
hsa-mir-494-3p	DNAJA3
hsa-mir-494-3p	DNAJA3
hsa-mir-494-3p	CD276
hsa-mir-494-3p	CEMIP
hsa-mir-494-3p	TMEM87A
hsa-mir-494-3p	GABPB1
hsa-mir-494-3p	TJP1
hsa-mir-494-3p	TJP1
hsa-mir-494-3p	EIF3J
hsa-mir-494-3p	CA2
hsa-mir-494-3p	EIF3E
hsa-mir-494-3p	UBXN8
hsa-mir-494-3p	BNIP3L
hsa-mir-494-3p	NFKBIB
hsa-mir-494-3p	NFKBIB
hsa-mir-494-3p	ASF1B
hsa-mir-494-3p	ASF1B
hsa-mir-494-3p	VRK3
hsa-mir-494-3p	PDCD5
hsa-mir-494-3p	TIMM50
hsa-mir-494-3p	PIAS4
hsa-mir-494-3p	HNRNPUL1
hsa-mir-494-3p	LIG1
hsa-mir-494-3p	WDR83OS
hsa-mir-494-3p	RPL18A
hsa-mir-494-3p	TMEM147
hsa-mir-494-3p	DNAJC2
hsa-mir-494-3p	TFPI2
hsa-mir-494-3p	ZC3HAV1
hsa-mir-494-3p	OGDH
hsa-mir-494-3p	CAV2
hsa-mir-494-3p	LMBR1
hsa-mir-494-3p	DNAJB6
hsa-mir-494-3p	LFNG
hsa-mir-494-3p	HIBADH
hsa-mir-494-3p	CASP2
hsa-mir-494-3p	PDAP1
hsa-mir-494-3p	WASL
hsa-mir-494-3p	PCOLCE
hsa-mir-494-3p	GLCCI1
hsa-mir-494-3p	PHF14
hsa-mir-494-3p	ANKMY2
hsa-mir-494-3p	TBC1D13
hsa-mir-494-3p	EXOSC3
hsa-mir-494-3p	ZFAND5
hsa-mir-494-3p	NPM3
hsa-mir-494-3p	MAP3K8
hsa-mir-494-3p	GLRX3
hsa-mir-494-3p	CCDC6
hsa-mir-494-3p	RAD51C
hsa-mir-494-3p	TRIM37
hsa-mir-494-3p	TUBD1
hsa-mir-494-3p	RPS6KB1
hsa-mir-494-3p	CBX1
hsa-mir-494-3p	RNF167
hsa-mir-494-3p	CPD
hsa-mir-494-3p	FTSJ3
hsa-mir-494-3p	AKAP10
hsa-mir-494-3p	VAT1
hsa-mir-494-3p	PRKAR1A
hsa-mir-494-3p	YWHAE
hsa-mir-494-3p	YWHAE
hsa-mir-494-3p	TMEM97
hsa-mir-494-3p	OCIAD1
hsa-mir-494-3p	ELF2
hsa-mir-494-3p	TBC1D9
hsa-mir-494-3p	NEIL3
hsa-mir-494-3p	KLF3
hsa-mir-494-3p	CCDC34
hsa-mir-494-3p	FNBP4
hsa-mir-494-3p	FNBP4
hsa-mir-494-3p	OSBP
hsa-mir-494-3p	CPT1A
hsa-mir-494-3p	PRPF19
hsa-mir-494-3p	TMEM109
hsa-mir-494-3p	CHORDC1
hsa-mir-494-3p	CHORDC1
hsa-mir-494-3p	EIF4G2
hsa-mir-494-3p	C11orf58
hsa-mir-494-3p	PRDM4
hsa-mir-494-3p	CORO1C
hsa-mir-494-3p	SLC11A2
hsa-mir-494-3p	FOXM1
hsa-mir-494-3p	ARPC3
hsa-mir-494-3p	VPS29
hsa-mir-494-3p	C12orf49
hsa-mir-494-3p	CAND1
hsa-mir-494-3p	RAB5B
hsa-mir-494-3p	NOP2
hsa-mir-494-3p	CHD4
hsa-mir-494-3p	COPS7A
hsa-mir-494-3p	ING4
hsa-mir-494-3p	CDCA3
hsa-mir-494-3p	CHPT1
hsa-mir-494-3p	C12orf57
hsa-mir-494-3p	GOLT1B
hsa-mir-494-3p	CMAS
hsa-mir-494-3p	SRSF9
hsa-mir-494-3p	DSE
hsa-mir-494-3p	PAK1IP1
hsa-mir-494-3p	PAK1IP1
hsa-mir-494-3p	HDDC2
hsa-mir-494-3p	HINT3
hsa-mir-494-3p	STK38
hsa-mir-494-3p	SOD2
hsa-mir-494-3p	SOD2
hsa-mir-494-3p	EYA4
hsa-mir-494-3p	CCND3
hsa-mir-494-3p	COX7A2
hsa-mir-494-3p	TMEM30A
hsa-mir-494-3p	HARS2
hsa-mir-494-3p	FAF2
hsa-mir-494-3p	CNOT6
hsa-mir-494-3p	TTC1
hsa-mir-494-3p	ARRDC3
hsa-mir-494-3p	GOLPH3
hsa-mir-494-3p	SUB1
hsa-mir-494-3p	BRIX1
hsa-mir-494-3p	PRLR
hsa-mir-494-3p	PPWD1
hsa-mir-494-3p	CSNK1A1
hsa-mir-494-3p	HMGXB3
hsa-mir-494-3p	STC2
hsa-mir-494-3p	AMOTL2
hsa-mir-494-3p	NIT2
hsa-mir-494-3p	PDCD10
hsa-mir-494-3p	WNT5A
hsa-mir-494-3p	SNX4
hsa-mir-494-3p	MAPKAPK3
hsa-mir-494-3p	WDR48
hsa-mir-494-3p	ABCC5
hsa-mir-494-3p	SPCS1
hsa-mir-494-3p	EEF1B2
hsa-mir-494-3p	EEF1B2
hsa-mir-494-3p	ACTR1B
hsa-mir-494-3p	SLC35F5
hsa-mir-494-3p	CENPA
hsa-mir-494-3p	GTF3C2
hsa-mir-494-3p	PDE1A
hsa-mir-494-3p	RPS15
hsa-mir-494-3p	CLIP4
hsa-mir-494-3p	RTN4
hsa-mir-494-3p	LANCL1
hsa-mir-494-3p	STAT1
hsa-mir-494-3p	IGFBP5
hsa-mir-494-3p	EFHD1
hsa-mir-494-3p	COQ10B
hsa-mir-494-3p	MOB4
hsa-mir-494-3p	KDM3A
hsa-mir-494-3p	ABCB6
hsa-mir-494-3p	ODC1
hsa-mir-494-3p	RAB3GAP1
hsa-mir-494-3p	PNO1
hsa-mir-494-3p	SUMO1
hsa-mir-494-3p	NFE2L2
hsa-mir-494-3p	DHCR24
hsa-mir-494-3p	CACYBP
hsa-mir-494-3p	MRPL37
hsa-mir-494-3p	ASH1L
hsa-mir-494-3p	MAD2L2
hsa-mir-494-3p	WLS
hsa-mir-494-3p	BCAS2
hsa-mir-494-3p	GNPAT
hsa-mir-494-3p	C1orf109
hsa-mir-494-3p	TBCE
hsa-mir-494-3p	TBCE
hsa-mir-494-3p	TBCE
hsa-mir-494-3p	KLHL12
hsa-mir-494-3p	APH1A
hsa-mir-494-3p	F3
hsa-mir-494-3p	RSRP1
hsa-mir-494-3p	OSBPL9
hsa-mir-494-3p	PLAGL1
hsa-mir-494-3p	TNFAIP3
hsa-mir-494-3p	SGK1
hsa-mir-494-3p	RNF146
hsa-mir-494-3p	RPN2
hsa-mir-494-3p	CCNI
hsa-mir-494-3p	CPSF3
hsa-mir-494-3p	SENP5
hsa-mir-494-3p	C1orf198
hsa-mir-494-3p	CTNNAL1
hsa-mir-494-3p	PPP6C
hsa-mir-494-3p	NDUFA8
hsa-mir-494-3p	HSDL2
hsa-mir-494-3p	MAPKAP1
hsa-mir-494-3p	VPS4B
hsa-mir-494-3p	NPC2
hsa-mir-494-3p	EIF2B2
hsa-mir-494-3p	ZNF410
hsa-mir-494-3p	AFTPH
hsa-mir-494-3p	CRIPT
hsa-mir-494-3p	SLC17A5
hsa-mir-494-3p	OGFRL1
hsa-mir-494-3p	GNA13
hsa-mir-494-3p	CYSTM1
hsa-mir-494-3p	NUDCD1
hsa-mir-494-3p	TAF12
hsa-mir-494-3p	UFM1
hsa-mir-494-3p	EXOSC8
hsa-mir-494-3p	KIF18A
hsa-mir-494-3p	CRY2
hsa-mir-494-3p	KHDRBS1
hsa-mir-494-3p	LRIF1
hsa-mir-494-3p	KIAA1191
hsa-mir-494-3p	RBBP6
hsa-mir-494-3p	ANXA11
hsa-mir-494-3p	CBX3
hsa-mir-494-3p	ARL4A
hsa-mir-494-3p	SMU1
hsa-mir-494-3p	CLTA
hsa-mir-494-3p	ACO1
hsa-mir-494-3p	PLAU
hsa-mir-494-3p	CHST3
hsa-mir-494-3p	ZWINT
hsa-mir-494-3p	PRDX4
hsa-mir-494-3p	CDK2
hsa-mir-494-3p	LRP1
hsa-mir-494-3p	KBTBD4
hsa-mir-494-3p	KBTBD4
hsa-mir-494-3p	CKS2
hsa-mir-494-3p	SDC4
hsa-mir-494-3p	NCOA3
hsa-mir-494-3p	SRSF6
hsa-mir-494-3p	RNF114
hsa-mir-494-3p	VAMP7
hsa-mir-494-3p	MPHOSPH10
hsa-mir-494-3p	USP22
hsa-mir-494-3p	RRP36
hsa-mir-494-3p	MED20
hsa-mir-494-3p	CDKN1A
hsa-mir-494-3p	RIOK1
hsa-mir-494-3p	EEF1E1
hsa-mir-494-3p	AHNAK
hsa-mir-494-3p	C16orf70
hsa-mir-494-3p	SOX9
hsa-mir-494-3p	MED1
hsa-mir-494-3p	SNRPB
hsa-mir-494-3p	TBC1D20
hsa-mir-494-3p	MCM8
hsa-mir-494-3p	HNRNPR
hsa-mir-494-3p	HNRNPR
hsa-mir-494-3p	ID1
hsa-mir-494-3p	EIF2S2
hsa-mir-494-3p	PLAGL2
hsa-mir-494-3p	TUBGCP3
hsa-mir-494-3p	TUBGCP3
hsa-mir-494-3p	MCF2L
hsa-mir-494-3p	UBA2
hsa-mir-494-3p	PRMT1
hsa-mir-494-3p	TRAP1
hsa-mir-494-3p	CTAG2
hsa-mir-494-3p	COX7C
hsa-mir-494-3p	AAMP
hsa-mir-494-3p	RNF6
hsa-mir-494-3p	GNG11
hsa-mir-494-3p	CASD1
hsa-mir-494-3p	SDF2L1
hsa-mir-494-3p	LIF
hsa-mir-494-3p	CPA4
hsa-mir-494-3p	PODXL
hsa-mir-494-3p	DNAJB9
hsa-mir-494-3p	TWSG1
hsa-mir-494-3p	MBD4
hsa-mir-494-3p	PALLD
hsa-mir-494-3p	DCTD
hsa-mir-494-3p	TXNDC17
hsa-mir-494-3p	SLC44A2
hsa-mir-494-3p	HEATR5A
hsa-mir-494-3p	EPB41L4A
hsa-mir-494-3p	ITFG1
hsa-mir-494-3p	LDLR
hsa-mir-494-3p	SNX9
hsa-mir-494-3p	ARPC1B
hsa-mir-494-3p	ATXN10
hsa-mir-494-3p	CEP85
hsa-mir-494-3p	ASS1
hsa-mir-494-3p	EXOSC2
hsa-mir-494-3p	CHMP2A
hsa-mir-494-3p	SLC35D2
hsa-mir-494-3p	SLC35D2
hsa-mir-494-3p	SH3BGRL
hsa-mir-494-3p	PPT1
hsa-mir-494-3p	ABCB7
hsa-mir-494-3p	SLC6A6
hsa-mir-494-3p	TUBG1
hsa-mir-494-3p	PSME3
hsa-mir-494-3p	RPL27
hsa-mir-494-3p	UBE2D2
hsa-mir-494-3p	THOC6
hsa-mir-494-3p	MCCC2
hsa-mir-494-3p	MCCC2
hsa-mir-494-3p	MCCC2
hsa-mir-494-3p	DNAJB1
hsa-mir-494-3p	RAF1
hsa-mir-494-3p	NUP210
hsa-mir-494-3p	EFR3A
hsa-mir-494-3p	TBC1D14
hsa-mir-494-3p	SEC61G
hsa-mir-494-3p	ANKRD17
hsa-mir-494-3p	WBP2
hsa-mir-494-3p	ZRANB2
hsa-mir-494-3p	NIP7
hsa-mir-494-3p	BTBD3
hsa-mir-494-3p	POLR3F
hsa-mir-494-3p	SERINC3
hsa-mir-494-3p	POMP
hsa-mir-494-3p	FAM104A
hsa-mir-494-3p	WDR74
hsa-mir-494-3p	ATP13A3
hsa-mir-494-3p	CCDC59
hsa-mir-494-3p	SWAP70
hsa-mir-494-3p	RRAS2
hsa-mir-494-3p	SARAF
hsa-mir-494-3p	MED6
hsa-mir-494-3p	BHLHE40
hsa-mir-494-3p	ARL8B
hsa-mir-494-3p	MEIS2
hsa-mir-494-3p	GSTM3
hsa-mir-494-3p	VAV3
hsa-mir-494-3p	PSRC1
hsa-mir-494-3p	NOTCH2
hsa-mir-494-3p	SPIRE1
hsa-mir-494-3p	TMEM106C
hsa-mir-494-3p	SLC38A2
hsa-mir-494-3p	IL6ST
hsa-mir-494-3p	FST
hsa-mir-494-3p	RBM17
hsa-mir-494-3p	DDB2
hsa-mir-494-3p	ACP2
hsa-mir-494-3p	GNL2
hsa-mir-494-3p	TMEM165
hsa-mir-494-3p	TPP2
hsa-mir-494-3p	TMED7
hsa-mir-494-3p	NREP
hsa-mir-494-3p	WDR36
hsa-mir-494-3p	ISCA1
hsa-mir-494-3p	SNX14
hsa-mir-494-3p	ORC3
hsa-mir-494-3p	DNAJC14
hsa-mir-494-3p	MPHOSPH6
hsa-mir-494-3p	KCNK1
hsa-mir-494-3p	URB2
hsa-mir-494-3p	COG2
hsa-mir-494-3p	NTPCR
hsa-mir-494-3p	PIGC
hsa-mir-494-3p	MRPL44
hsa-mir-494-3p	TMBIM1
hsa-mir-494-3p	SCYL2
hsa-mir-494-3p	CKAP4
hsa-mir-494-3p	PWP1
hsa-mir-494-3p	CKAP2
hsa-mir-494-3p	COG3
hsa-mir-494-3p	BZW2
hsa-mir-494-3p	CALCOCO2
hsa-mir-494-3p	SRSF1
hsa-mir-494-3p	VEZF1
hsa-mir-494-3p	MRPL47
hsa-mir-494-3p	VPS45
hsa-mir-494-3p	SMPD4
hsa-mir-494-3p	ABI1
hsa-mir-494-3p	NIPSNAP3A
hsa-mir-494-3p	LRRC8A
hsa-mir-494-3p	TOR1A
hsa-mir-494-3p	MRPL50
hsa-mir-494-3p	ANP32B
hsa-mir-494-3p	DSCC1
hsa-mir-494-3p	DERL1
hsa-mir-494-3p	RANBP6
hsa-mir-494-3p	RNF38
hsa-mir-494-3p	CNPY3
hsa-mir-494-3p	PIM1
hsa-mir-494-3p	YIPF3
hsa-mir-494-3p	CPEB2
hsa-mir-494-3p	CPEB2
hsa-mir-494-3p	NARS2
hsa-mir-494-3p	CTDSPL2
hsa-mir-494-3p	THBS1
hsa-mir-494-3p	NUSAP1
hsa-mir-494-3p	SEMA6D
hsa-mir-494-3p	GTF2B
hsa-mir-494-3p	RABGGTB
hsa-mir-494-3p	CYP1B1
hsa-mir-494-3p	RAB1A
hsa-mir-494-3p	LRPPRC
hsa-mir-494-3p	STAMBPL1
hsa-mir-494-3p	KIF20B
hsa-mir-494-3p	DNA2
hsa-mir-494-3p	SSB
hsa-mir-494-3p	NAB1
hsa-mir-494-3p	ITGAV
hsa-mir-494-3p	SLC35A5
hsa-mir-494-3p	USP8
hsa-mir-494-3p	SPPL2A
hsa-mir-494-3p	GLCE
hsa-mir-494-3p	AP1AR
hsa-mir-494-3p	FGF5
hsa-mir-494-3p	G3BP2
hsa-mir-494-3p	SCARB2
hsa-mir-494-3p	USO1
hsa-mir-494-3p	HADH
hsa-mir-494-3p	SEC24B
hsa-mir-494-3p	ETNK1
hsa-mir-494-3p	NDUFA9
hsa-mir-494-3p	LLPH
hsa-mir-494-3p	TARBP2
hsa-mir-494-3p	CERS5
hsa-mir-494-3p	C12orf10
hsa-mir-494-3p	ESD
hsa-mir-494-3p	SETD1B
hsa-mir-494-3p	RAB20
hsa-mir-494-3p	SLC38A6
hsa-mir-494-3p	BNIP2
hsa-mir-494-3p	UBE2Q2
hsa-mir-494-3p	IQGAP1
hsa-mir-494-3p	CRTC3
hsa-mir-494-3p	GLYR1
hsa-mir-494-3p	PARN
hsa-mir-494-3p	PARN
hsa-mir-494-3p	UQCRC2
hsa-mir-494-3p	UQCRC2
hsa-mir-494-3p	NPEPPS
hsa-mir-494-3p	GALNT1
hsa-mir-494-3p	MINK1
hsa-mir-494-3p	SLC16A3
hsa-mir-494-3p	FN3KRP
hsa-mir-494-3p	SAE1
hsa-mir-494-3p	PSMB6
hsa-mir-494-3p	KIAA0319L
hsa-mir-494-3p	LMO4
hsa-mir-494-3p	ALDH9A1
hsa-mir-494-3p	CREG1
hsa-mir-494-3p	MGST3
hsa-mir-494-3p	HDGF
hsa-mir-494-3p	TOR1AIP1
hsa-mir-494-3p	MCL1
hsa-mir-494-3p	PIP5K1A
hsa-mir-494-3p	DTL
hsa-mir-494-3p	DUSP10
hsa-mir-494-3p	SNAPIN
hsa-mir-494-3p	C1orf43
hsa-mir-494-3p	MEIS1
hsa-mir-494-3p	DUSP11
hsa-mir-494-3p	SLC20A1
hsa-mir-494-3p	AFF3
hsa-mir-494-3p	GULP1
hsa-mir-494-3p	RAB5A
hsa-mir-494-3p	CTDSP1
hsa-mir-494-3p	SLC25A38
hsa-mir-494-3p	CTDSPL
hsa-mir-494-3p	SRPRB
hsa-mir-494-3p	EIF2A
hsa-mir-494-3p	FIP1L1
hsa-mir-494-3p	LYAR
hsa-mir-494-3p	PLAC8
hsa-mir-494-3p	USP53
hsa-mir-494-3p	SRD5A1
hsa-mir-494-3p	RPL37
hsa-mir-494-3p	OSMR
hsa-mir-494-3p	SLC30A5
hsa-mir-494-3p	BTF3
hsa-mir-494-3p	FEM1C
hsa-mir-494-3p	G3BP1
hsa-mir-494-3p	ZMAT2
hsa-mir-494-3p	HIGD2A
hsa-mir-494-3p	TMEM181
hsa-mir-494-3p	EGFR
hsa-mir-494-3p	TMEM209
hsa-mir-494-3p	NCAPG2
hsa-mir-494-3p	CHMP7
hsa-mir-494-3p	GINS4
hsa-mir-494-3p	RPL7
hsa-mir-494-3p	HAUS6
hsa-mir-494-3p	STOM
hsa-mir-494-3p	SURF4
hsa-mir-494-3p	SURF4
hsa-mir-494-3p	MED22
hsa-mir-494-3p	MED22
hsa-mir-494-3p	SLC25A25
hsa-mir-494-3p	GPR107
hsa-mir-494-3p	SEC16A
hsa-mir-494-3p	EIF4EBP2
hsa-mir-494-3p	LIN7C
hsa-mir-494-3p	ARFGAP2
hsa-mir-494-3p	INTS4
hsa-mir-494-3p	HYOU1
hsa-mir-494-3p	HYOU1
hsa-mir-494-3p	CHEK1
hsa-mir-494-3p	DSN1
hsa-mir-494-3p	PPP4C
hsa-mir-494-3p	TMEM219
hsa-mir-494-3p	ITGB1
hsa-mir-494-3p	SAP18
hsa-mir-494-3p	FOXO1
hsa-mir-494-3p	UBC
hsa-mir-494-3p	SLC7A11
hsa-mir-494-3p	DCP1B
hsa-mir-494-3p	DCP1B
hsa-mir-494-3p	UEVLD
hsa-mir-494-3p	EXT2
hsa-mir-494-3p	NDUFC2
hsa-mir-494-3p	AKR1C2
hsa-mir-494-3p	SAV1
hsa-mir-494-3p	NBAS
hsa-mir-494-3p	SCHIP1
hsa-mir-494-3p	SCHIP1
hsa-mir-494-3p	HSPB8
hsa-mir-494-3p	TMEM123
hsa-mir-494-3p	PANK1
hsa-mir-494-3p	PLOD2
hsa-mir-494-3p	LPCAT1
hsa-mir-494-3p	LPCAT1
hsa-mir-494-3p	RMND5A
hsa-mir-494-3p	GTF2E1
hsa-mir-494-3p	CHD1
hsa-mir-494-3p	THY1
hsa-mir-494-3p	ENAH
hsa-mir-494-3p	BTG3
hsa-mir-494-3p	BTG3
hsa-mir-494-3p	ADAMTS1
hsa-mir-494-3p	TSEN2
hsa-mir-494-3p	DPH3
hsa-mir-494-3p	ANKRD40
hsa-mir-494-3p	VOPP1
hsa-mir-494-3p	KLF10
hsa-mir-494-3p	OTUD6B
hsa-mir-494-3p	TMEM237
hsa-mir-494-3p	MED7
hsa-mir-494-3p	HK1
hsa-mir-494-3p	RAB11FIP1
hsa-mir-494-3p	EIF4A2
hsa-mir-494-3p	NTAN1
hsa-mir-494-3p	NTAN1
hsa-mir-494-3p	MRPL17
hsa-mir-494-3p	FAIM
hsa-mir-494-3p	ELK4
hsa-mir-494-3p	B4GALT3
hsa-mir-494-3p	CDC42SE2
hsa-mir-494-3p	MIS18A
hsa-mir-494-3p	ALG8
hsa-mir-494-3p	MRPL10
hsa-mir-494-3p	DONSON
hsa-mir-494-3p	RCAN1
hsa-mir-494-3p	CBR1
hsa-mir-494-3p	ADPGK
hsa-mir-494-3p	AMFR
hsa-mir-494-3p	DFFA
hsa-mir-494-3p	NDUFV3
hsa-mir-494-3p	U2AF1
hsa-mir-494-3p	TOR2A
hsa-mir-494-3p	ZDHHC12
hsa-mir-494-3p	RUSC1
hsa-mir-494-3p	CPSF4
hsa-mir-494-3p	PSMC2
hsa-mir-494-3p	LSM12
hsa-mir-494-3p	LARP4
hsa-mir-494-3p	SENP3
hsa-mir-494-3p	EIF4A1
hsa-mir-494-3p	RBBP4
hsa-mir-494-3p	FUBP1
hsa-mir-494-3p	ZNF281
hsa-mir-494-3p	ARPC5
hsa-mir-494-3p	PEA15
hsa-mir-494-3p	MAPKAPK2
hsa-mir-494-3p	CAPN2
hsa-mir-494-3p	YY1AP1
hsa-mir-494-3p	TGFBR2
hsa-mir-494-3p	GMPS
hsa-mir-494-3p	PTX3
hsa-mir-494-3p	RPP14
hsa-mir-494-3p	MTMR14
hsa-mir-494-3p	CXCL3
hsa-mir-494-3p	HPS3
hsa-mir-494-3p	RYK
hsa-mir-494-3p	WDR43
hsa-mir-494-3p	TMEM41A
hsa-mir-494-3p	RPN1
hsa-mir-494-3p	GNL3
hsa-mir-494-3p	SHISA5
hsa-mir-494-3p	C4orf3
hsa-mir-494-3p	SAP30
hsa-mir-494-3p	MAD2L1
hsa-mir-494-3p	ABCE1
hsa-mir-494-3p	LSM6
hsa-mir-494-3p	NDUFAF2
hsa-mir-494-3p	STARD4
hsa-mir-494-3p	GPX8
hsa-mir-494-3p	UBLCP1
hsa-mir-494-3p	UTP15
hsa-mir-494-3p	GFM2
hsa-mir-494-3p	FOXQ1
hsa-mir-494-3p	CITED2
hsa-mir-494-3p	SFXN1
hsa-mir-494-3p	SLU7
hsa-mir-494-3p	PTTG1
hsa-mir-494-3p	ZNF12
hsa-mir-494-3p	OSGIN2
hsa-mir-494-3p	COX6C
hsa-mir-494-3p	FZD6
hsa-mir-494-3p	NFIL3
hsa-mir-494-3p	C9orf64
hsa-mir-494-3p	GAPVD1
hsa-mir-494-3p	ZNF367
hsa-mir-494-3p	AQP3
hsa-mir-494-3p	SPTSSA
hsa-mir-494-3p	PGM2L1
hsa-mir-494-3p	ZNF22
hsa-mir-494-3p	ARF6
hsa-mir-494-3p	PRPF18
hsa-mir-494-3p	NSD1
hsa-mir-494-3p	E2F7
hsa-mir-494-3p	PACSIN3
hsa-mir-494-3p	MOAP1
hsa-mir-494-3p	MOAP1
hsa-mir-494-3p	API5
hsa-mir-494-3p	RPL27A
hsa-mir-494-3p	AKIP1
hsa-mir-494-3p	TMED3
hsa-mir-494-3p	NDEL1
hsa-mir-494-3p	BLCAP
hsa-mir-494-3p	VPS39
hsa-mir-494-3p	STX3
hsa-mir-494-3p	PBX3
hsa-mir-494-3p	CERCAM
hsa-mir-494-3p	DOLPP1
hsa-mir-494-3p	VKORC1
hsa-mir-494-3p	TPM4
hsa-mir-494-3p	AXL
hsa-mir-494-3p	MIS12
hsa-mir-494-3p	TK1
hsa-mir-494-3p	KCTD5
hsa-mir-494-3p	MGAT2
hsa-mir-494-3p	ATXN2L
hsa-mir-494-3p	COL3A1
hsa-mir-494-3p	STAT3
hsa-mir-494-3p	TMEM208
hsa-mir-494-3p	CNNM3
hsa-mir-494-3p	GFM1
hsa-mir-494-3p	CEP120
hsa-mir-494-3p	UBE2V2
hsa-mir-494-3p	ZBTB43
hsa-mir-494-3p	APEX2
hsa-mir-494-3p	LMAN2
hsa-mir-494-3p	SLC50A1
hsa-mir-494-3p	MRPL1
hsa-mir-494-3p	HIC2
hsa-mir-494-3p	BUB1
hsa-mir-494-3p	CNBP
hsa-mir-494-3p	UGP2
hsa-mir-494-3p	KLF13
hsa-mir-494-3p	KLF13
hsa-mir-494-3p	TMEM42
hsa-mir-494-3p	TMEM42
hsa-mir-494-3p	ZNF35
hsa-mir-494-3p	ZNF35
hsa-mir-494-3p	UBE2E1
hsa-mir-494-3p	PWWP2A
hsa-mir-494-3p	GLB1
hsa-mir-494-3p	KRT8
hsa-mir-494-3p	ARL6IP1
hsa-mir-494-3p	COMMD5
hsa-mir-494-3p	SOCS6
hsa-mir-494-3p	KIF5B
hsa-mir-494-3p	SOCS5
hsa-mir-494-3p	CANT1
hsa-mir-494-3p	EXOSC1
hsa-mir-494-3p	PGAM1
hsa-mir-494-3p	CHD7
hsa-mir-494-3p	ASXL1
hsa-mir-494-3p	RSL1D1
hsa-mir-494-3p	LRRC8D
hsa-mir-494-3p	PPID
hsa-mir-494-3p	SPSB1
hsa-mir-494-3p	CAMTA1
hsa-mir-494-3p	RRM2
hsa-mir-494-3p	RPS7
hsa-mir-494-3p	PRNP
hsa-mir-494-3p	ZNF217
hsa-mir-494-3p	ZNF131
hsa-mir-494-3p	BSG
hsa-mir-494-3p	AFF1
hsa-mir-494-3p	RARG
hsa-mir-494-3p	SP3
hsa-mir-494-3p	KAT5
hsa-mir-494-3p	DCAKD
hsa-mir-494-3p	ESRRA
hsa-mir-494-3p	CKS1B
hsa-mir-494-3p	DAG1
hsa-mir-494-3p	PSMD1
hsa-mir-494-3p	HEG1
hsa-mir-494-3p	STAT5B
hsa-mir-494-3p	EIF1
hsa-mir-494-3p	DPY19L1
hsa-mir-494-3p	RBM4B
hsa-mir-494-3p	LEMD3
hsa-mir-494-3p	RGMB
hsa-mir-494-3p	PRPF8
hsa-mir-494-3p	PRPF8
hsa-mir-494-3p	AKIRIN1
hsa-mir-494-3p	RPL15
hsa-mir-494-3p	PACS1
hsa-mir-494-3p	CTDSP2
hsa-mir-494-3p	DOLK
hsa-mir-494-3p	BANF1
hsa-mir-494-3p	TMEM70
hsa-mir-494-3p	RMI2
hsa-mir-494-3p	COX8A
hsa-mir-494-3p	RUFY1
hsa-mir-494-3p	RUFY1
hsa-mir-494-3p	ZDHHC13
hsa-mir-494-3p	SLC38A9
hsa-mir-494-3p	RPS6KA3
hsa-mir-494-3p	ARIH2
hsa-mir-494-3p	THAP5
hsa-mir-494-3p	POLR2L
hsa-mir-494-3p	UBE2N
hsa-mir-494-3p	NDUFAF3
hsa-mir-494-3p	DDX10
hsa-mir-494-3p	SPINK6
hsa-mir-494-3p	GRINA
hsa-mir-494-3p	FBXO34
hsa-mir-494-3p	EIF3K
hsa-mir-494-3p	EIF3K
hsa-mir-494-3p	C3orf38
hsa-mir-494-3p	TMEM107
hsa-mir-494-3p	RRS1
hsa-mir-494-3p	FUCA1
hsa-mir-494-3p	FJX1
hsa-mir-494-3p	MAF1
hsa-mir-494-3p	C14orf119
hsa-mir-494-3p	MED14
hsa-mir-494-3p	RNF182
hsa-mir-494-3p	YOD1
hsa-mir-494-3p	GREM2
hsa-mir-494-3p	SSR4
hsa-mir-494-3p	CUEDC1
hsa-mir-494-3p	TMEM45A
hsa-mir-494-3p	SIAH2
hsa-mir-494-3p	PRKAG1
hsa-mir-494-3p	MRPS11
hsa-mir-494-3p	NOP10
hsa-mir-494-3p	IST1
hsa-mir-494-3p	MRPS16
hsa-mir-494-3p	CYB5D1
hsa-mir-494-3p	MFSD5
hsa-mir-494-3p	ADI1
hsa-mir-494-3p	ADI1
hsa-mir-494-3p	SKA2
hsa-mir-494-3p	TSKU
hsa-mir-494-3p	NGRN
hsa-mir-494-3p	RPL35A
hsa-mir-494-3p	TOB2
hsa-mir-494-3p	ACTG1
hsa-mir-494-3p	DENND5A
hsa-mir-494-3p	UQCR10
hsa-mir-494-3p	NIPSNAP1
hsa-mir-494-3p	NR2C2AP
hsa-mir-494-3p	SS18L1
hsa-mir-494-3p	XPOT
hsa-mir-494-3p	SNN
hsa-mir-494-3p	ATL3
hsa-mir-494-3p	UBE2G2
hsa-mir-494-3p	C6orf120
hsa-mir-494-3p	PBX1
hsa-mir-494-3p	ZFP36L1
hsa-mir-494-3p	YTHDF3
hsa-mir-494-3p	MORF4L1
hsa-mir-494-3p	ANKRD46
hsa-mir-494-3p	POLR1D
hsa-mir-494-3p	ZNF17
hsa-mir-494-3p	INSIG1
hsa-mir-494-3p	LYPD6
hsa-mir-494-3p	TSPYL4
hsa-mir-494-3p	MT1X
hsa-mir-494-3p	COL4A1
hsa-mir-494-3p	TMEM203
hsa-mir-494-3p	TCEA1
hsa-mir-494-3p	NHEJ1
hsa-mir-494-3p	MORN2
hsa-mir-494-3p	AGRN
hsa-mir-494-3p	FAM166A
hsa-mir-494-3p	TUBB4B
hsa-mir-494-3p	NHLRC3
hsa-mir-494-3p	ZNF567
hsa-mir-494-3p	NDUFA4
hsa-mir-494-3p	SF3B3
hsa-mir-494-3p	CD55
hsa-mir-494-3p	EPHB4
hsa-mir-494-3p	XRCC6
hsa-mir-494-3p	MYL6B
hsa-mir-494-3p	NACA
hsa-mir-494-3p	FAM72A
hsa-mir-494-3p	VKORC1L1
hsa-mir-494-3p	GM2A
hsa-mir-494-3p	FUT11
hsa-mir-494-3p	METTL9
hsa-mir-494-3p	METTL9
hsa-mir-494-3p	ZNF138
hsa-mir-494-3p	CXorf40B
hsa-mir-494-3p	MAFG
hsa-mir-494-3p	IGF2R
hsa-mir-494-3p	MAGEA6
hsa-mir-494-3p	C1D
hsa-mir-494-3p	MRPL21
hsa-mir-494-3p	GSTK1
hsa-mir-494-3p	CDC42SE1
hsa-mir-494-3p	FAM114A1
hsa-mir-494-3p	ZNF460
hsa-mir-494-3p	MCMBP
hsa-mir-494-3p	RPL12
hsa-mir-494-3p	ZNF121
hsa-mir-494-3p	NOL8
hsa-mir-494-3p	ZNF248
hsa-mir-494-3p	MAFK
hsa-mir-494-3p	WDHD1
hsa-mir-494-3p	COPS8
hsa-mir-494-3p	NCOA6
hsa-mir-494-3p	STK39
hsa-mir-494-3p	C6orf89
hsa-mir-494-3p	CTR9
hsa-mir-494-3p	SMOC1
hsa-mir-494-3p	RPL10A
hsa-mir-494-3p	ZNF830
hsa-mir-494-3p	GK
hsa-mir-494-3p	SFT2D1
hsa-mir-494-3p	KTI12
hsa-mir-494-3p	TSEN15
hsa-mir-494-3p	PRMT6
hsa-mir-494-3p	RPL39
hsa-mir-494-3p	SGMS1
hsa-mir-494-3p	GIGYF2
hsa-mir-494-3p	LGR4
hsa-mir-494-3p	PDE7A
hsa-mir-494-3p	CNEP1R1
hsa-mir-494-3p	LIN52
hsa-mir-494-3p	RNPS1
hsa-mir-494-3p	RAB12
hsa-mir-494-3p	VGLL3
hsa-mir-494-3p	DIO2
hsa-mir-494-3p	SACM1L
hsa-mir-494-3p	SLC48A1
hsa-mir-494-3p	ZNF254
hsa-mir-494-3p	SUPT4H1
hsa-mir-494-3p	CSNK1E
hsa-mir-494-3p	NUDT19
hsa-mir-494-3p	CPNE1
hsa-mir-494-3p	LYRM4
hsa-mir-494-3p	ALG3
hsa-mir-494-3p	TOMM6
hsa-mir-494-3p	ARHGEF28
hsa-mir-494-3p	RNASEK
hsa-mir-494-3p	PPP3R1
hsa-mir-494-3p	MAGEA3
hsa-mir-494-3p	PPP2R2A
hsa-mir-494-3p	NOL7
hsa-mir-494-3p	HSBP1
hsa-mir-494-3p	RPS28
hsa-mir-494-3p	ZBED5
hsa-mir-494-3p	NME1
hsa-mir-494-3p	MRPS17
hsa-mir-494-3p	ADSL
hsa-mir-494-3p	MIF
hsa-mir-494-3p	MIF
hsa-mir-494-3p	ARFGAP3
hsa-mir-494-3p	PEG10
hsa-mir-494-3p	GNG10
hsa-mir-494-3p	IL10RB
hsa-mir-494-3p	PDCD6
hsa-mir-494-3p	PINX1
hsa-mir-494-3p	PINX1
hsa-mir-494-3p	PINX1
hsa-mir-494-3p	EID1
hsa-mir-494-3p	MTRNR2L8
hsa-mir-494-3p	MTRNR2L1
hsa-mir-494-3p	RPL36A-HNRNPH2
hsa-mir-494-3p	GPR75-ASB3
hsa-mir-494-5p	ALDH9A1
hsa-mir-494-5p	DPYD
hsa-mir-494-5p	EIF2S3
hsa-mir-494-5p	H1F0
hsa-mir-494-5p	MSR1
hsa-mir-494-5p	MYO10
hsa-mir-494-5p	POU2F2
hsa-mir-494-5p	PTEN
hsa-mir-494-5p	RPL41
hsa-mir-494-5p	RRM2
hsa-mir-494-5p	SCD
hsa-mir-494-5p	CXCR4
hsa-mir-494-5p	TECPR2
hsa-mir-494-5p	GNA13
hsa-mir-494-5p	SRGAP2
hsa-mir-494-5p	RPL13A
hsa-mir-494-5p	RNF115
hsa-mir-494-5p	GLRX5
hsa-mir-494-5p	UHRF1BP1
hsa-mir-494-5p	NDUFAF7
hsa-mir-494-5p	STRIP2
hsa-mir-494-5p	PITPNM3
hsa-mir-494-5p	QRFPR
hsa-mir-494-5p	GTPBP10
hsa-mir-494-5p	CCDC149
hsa-mir-494-5p	CREBRF
hsa-mir-494-5p	TET3
hsa-mir-494-5p	ZNF850

## Sheet: 655
hsa-mir-655-3p	ADAM10
hsa-mir-655-3p	ADM
hsa-mir-655-3p	ARHGAP6
hsa-mir-655-3p	CALM2
hsa-mir-655-3p	CANX
hsa-mir-655-3p	CASP2
hsa-mir-655-3p	CYP1A1
hsa-mir-655-3p	TIMM8A
hsa-mir-655-3p	ELK4
hsa-mir-655-3p	ESD
hsa-mir-655-3p	ETFDH
hsa-mir-655-3p	GPR26
hsa-mir-655-3p	MRPL58
hsa-mir-655-3p	JUN
hsa-mir-655-3p	KCNMB1
hsa-mir-655-3p	KIF5B
hsa-mir-655-3p	DNAJB9
hsa-mir-655-3p	MID1
hsa-mir-655-3p	PDK3
hsa-mir-655-3p	PEX13
hsa-mir-655-3p	PRRX1
hsa-mir-655-3p	PSEN1
hsa-mir-655-3p	RAC1
hsa-mir-655-3p	RPS17
hsa-mir-655-3p	RREB1
hsa-mir-655-3p	SATB1
hsa-mir-655-3p	SKI
hsa-mir-655-3p	TROVE2
hsa-mir-655-3p	ZEB1
hsa-mir-655-3p	TFAP2C
hsa-mir-655-3p	TGFBR2
hsa-mir-655-3p	TRPS1
hsa-mir-655-3p	WEE1
hsa-mir-655-3p	CNBP
hsa-mir-655-3p	PTP4A1
hsa-mir-655-3p	FZD6
hsa-mir-655-3p	NRP2
hsa-mir-655-3p	PTTG1
hsa-mir-655-3p	GPR50
hsa-mir-655-3p	PHACTR2
hsa-mir-655-3p	MAGI2
hsa-mir-655-3p	BCL2L11
hsa-mir-655-3p	ARPC3
hsa-mir-655-3p	HIPK3
hsa-mir-655-3p	IGF2BP3
hsa-mir-655-3p	DDX52
hsa-mir-655-3p	PRSS23
hsa-mir-655-3p	GPATCH8
hsa-mir-655-3p	EXOC7
hsa-mir-655-3p	CAMSAP2
hsa-mir-655-3p	TRIM2
hsa-mir-655-3p	PSD3
hsa-mir-655-3p	KPNA6
hsa-mir-655-3p	ARIH1
hsa-mir-655-3p	CLEC4E
hsa-mir-655-3p	GNL3
hsa-mir-655-3p	ATAD2
hsa-mir-655-3p	ABT1
hsa-mir-655-3p	DERL2
hsa-mir-655-3p	ZNF107
hsa-mir-655-3p	VTA1
hsa-mir-655-3p	C21orf91
hsa-mir-655-3p	DDIT4
hsa-mir-655-3p	YTHDF1
hsa-mir-655-3p	YOD1
hsa-mir-655-3p	SPIRE1
hsa-mir-655-3p	ZNF695
hsa-mir-655-3p	SCAF4
hsa-mir-655-3p	MAVS
hsa-mir-655-3p	C17orf75
hsa-mir-655-3p	TBC1D15
hsa-mir-655-3p	CAPRIN2
hsa-mir-655-3p	DSN1
hsa-mir-655-3p	ABHD18
hsa-mir-655-3p	SLC35F5
hsa-mir-655-3p	TRIM56
hsa-mir-655-3p	TMTC1
hsa-mir-655-3p	UTP15
hsa-mir-655-3p	MAP3K21
hsa-mir-655-3p	AIFM2
hsa-mir-655-3p	BTBD9
hsa-mir-655-3p	PDZD8
hsa-mir-655-3p	MTPN
hsa-mir-655-3p	SESN3
hsa-mir-655-3p	E2F7
hsa-mir-655-3p	ZNF681
hsa-mir-655-3p	SLC23A3
hsa-mir-655-3p	SGO1
hsa-mir-655-3p	PPP4R2
hsa-mir-655-3p	CREBRF
hsa-mir-655-3p	DENND5B
hsa-mir-655-3p	ZNF610
hsa-mir-655-3p	TMEM64
hsa-mir-655-3p	ZDHHC20
hsa-mir-655-3p	ZNF850
hsa-mir-655-3p	NHLRC2
hsa-mir-655-3p	MIGA1
hsa-mir-655-3p	FAM69A
hsa-mir-655-3p	TRIM67
hsa-mir-655-3p	ANKRD33B
hsa-mir-655-3p	MYZAP
hsa-mir-655-3p	ZEB1
hsa-mir-655-3p	TGFBR2
hsa-mir-655-3p	PTTG1
hsa-mir-655-3p	CDH1
hsa-mir-655-3p	SAR1A
hsa-mir-655-3p	MMP2
hsa-mir-655-3p	TNRC6A
hsa-mir-655-3p	TNRC6A
hsa-mir-655-3p	MMP9
hsa-mir-655-3p	USP10
hsa-mir-655-3p	COL12A1
hsa-mir-655-3p	C1orf198
hsa-mir-655-3p	SLC38A2
hsa-mir-655-3p	STT3A
hsa-mir-655-3p	APP
hsa-mir-655-3p	NEK7
hsa-mir-655-3p	TNFRSF11B
hsa-mir-655-5p	AMD1
hsa-mir-655-5p	RHOB
hsa-mir-655-5p	CCND1
hsa-mir-655-5p	CASP10
hsa-mir-655-5p	CCNF
hsa-mir-655-5p	COMT
hsa-mir-655-5p	CTSB
hsa-mir-655-5p	DBT
hsa-mir-655-5p	DYNC1LI2
hsa-mir-655-5p	DVL3
hsa-mir-655-5p	NR2F6
hsa-mir-655-5p	ACSL3
hsa-mir-655-5p	GABPB1
hsa-mir-655-5p	GOLGA1
hsa-mir-655-5p	HNRNPU
hsa-mir-655-5p	SP110
hsa-mir-655-5p	IFNAR2
hsa-mir-655-5p	KRT8
hsa-mir-655-5p	LBR
hsa-mir-655-5p	CD180
hsa-mir-655-5p	SMAD5
hsa-mir-655-5p	MYC
hsa-mir-655-5p	NAP1L1
hsa-mir-655-5p	SLC11A2
hsa-mir-655-5p	PIK3CD
hsa-mir-655-5p	PPP3CC
hsa-mir-655-5p	PRKAR2A
hsa-mir-655-5p	PYCR1
hsa-mir-655-5p	QDPR
hsa-mir-655-5p	RHEBP1
hsa-mir-655-5p	RRM2
hsa-mir-655-5p	VPS52
hsa-mir-655-5p	SCO1
hsa-mir-655-5p	SHMT1
hsa-mir-655-5p	SKP1
hsa-mir-655-5p	SLC16A1
hsa-mir-655-5p	TFPI
hsa-mir-655-5p	SNX4
hsa-mir-655-5p	DPM2
hsa-mir-655-5p	CLDN12
hsa-mir-655-5p	PRPF4
hsa-mir-655-5p	NRXN3
hsa-mir-655-5p	MED21
hsa-mir-655-5p	SPTLC2
hsa-mir-655-5p	SEC14L5
hsa-mir-655-5p	TBC1D5
hsa-mir-655-5p	RNF40
hsa-mir-655-5p	HNRNPDL
hsa-mir-655-5p	TRIB1
hsa-mir-655-5p	NCKAP1
hsa-mir-655-5p	SEC24A
hsa-mir-655-5p	DSTN
hsa-mir-655-5p	SNRNP35
hsa-mir-655-5p	XPOT
hsa-mir-655-5p	DDX19B
hsa-mir-655-5p	ADNP2
hsa-mir-655-5p	CHSY1
hsa-mir-655-5p	NCBP2
hsa-mir-655-5p	KDM2A
hsa-mir-655-5p	KLHDC10
hsa-mir-655-5p	TAB2
hsa-mir-655-5p	LARP1
hsa-mir-655-5p	MAPK8IP2
hsa-mir-655-5p	CDC42EP4
hsa-mir-655-5p	THUMPD3
hsa-mir-655-5p	ZNF385A
hsa-mir-655-5p	RSL1D1
hsa-mir-655-5p	FBXW2
hsa-mir-655-5p	PDCD4
hsa-mir-655-5p	TOR2A
hsa-mir-655-5p	ZCCHC4
hsa-mir-655-5p	NRBF2
hsa-mir-655-5p	PACSIN1
hsa-mir-655-5p	IER5
hsa-mir-655-5p	FAM198B
hsa-mir-655-5p	CRNKL1
hsa-mir-655-5p	ARMCX6
hsa-mir-655-5p	MTMR12
hsa-mir-655-5p	PTCD3
hsa-mir-655-5p	THAP1
hsa-mir-655-5p	MSL2
hsa-mir-655-5p	RNF126
hsa-mir-655-5p	CLDND1
hsa-mir-655-5p	TBX20
hsa-mir-655-5p	AGTRAP
hsa-mir-655-5p	ZNF490
hsa-mir-655-5p	KIAA1468
hsa-mir-655-5p	CYP4F11
hsa-mir-655-5p	INIP
hsa-mir-655-5p	SLC30A5
hsa-mir-655-5p	NKAP
hsa-mir-655-5p	ORAI2
hsa-mir-655-5p	WDR26
hsa-mir-655-5p	LNPK
hsa-mir-655-5p	CDADC1
hsa-mir-655-5p	SLC25A28
hsa-mir-655-5p	NOA1
hsa-mir-655-5p	SLC25A33
hsa-mir-655-5p	ABHD14B
hsa-mir-655-5p	ZNF514
hsa-mir-655-5p	SERAC1
hsa-mir-655-5p	DCAF15
hsa-mir-655-5p	ZC3HAV1L
hsa-mir-655-5p	TJAP1
hsa-mir-655-5p	GLMP
hsa-mir-655-5p	LRRC58
hsa-mir-655-5p	TRIM71
hsa-mir-655-5p	GRPEL2
hsa-mir-655-5p	CARNMT1
hsa-mir-655-5p	SAMD8
hsa-mir-655-5p	RNF145
hsa-mir-655-5p	DENND5B
hsa-mir-655-5p	TMEM30B
hsa-mir-655-5p	PGBD4
hsa-mir-655-5p	ZNF100
hsa-mir-655-5p	ZNF431
hsa-mir-655-5p	SMIM13
hsa-mir-655-5p	PRR14L
hsa-mir-655-5p	ZDHHC24
hsa-mir-655-5p	TMEM196
hsa-mir-655-5p	ANKDD1A
hsa-mir-655-5p	ZBTB34
hsa-mir-655-5p	C12orf73
hsa-mir-655-5p	LINC01556

## Sheet: 656
hsa-mir-656-3p	BMPR1A
hsa-mir-656-3p	ZFP36L1
hsa-mir-656-3p	ZFP36L2
hsa-mir-656-3p	CCND2
hsa-mir-656-3p	CREB1
hsa-mir-656-3p	CD55
hsa-mir-656-3p	EIF2B1
hsa-mir-656-3p	ELK4
hsa-mir-656-3p	EPHA1
hsa-mir-656-3p	EREG
hsa-mir-656-3p	FYB1
hsa-mir-656-3p	GNG5
hsa-mir-656-3p	H3F3B
hsa-mir-656-3p	HOXA11
hsa-mir-656-3p	HOXC4
hsa-mir-656-3p	DNAJA1
hsa-mir-656-3p	HSP90AA1
hsa-mir-656-3p	ID4
hsa-mir-656-3p	ITGB8
hsa-mir-656-3p	L1CAM
hsa-mir-656-3p	MDM2
hsa-mir-656-3p	NFIB
hsa-mir-656-3p	PDPK1
hsa-mir-656-3p	PPP3R1
hsa-mir-656-3p	PURA
hsa-mir-656-3p	PEX2
hsa-mir-656-3p	RAB5C
hsa-mir-656-3p	REL
hsa-mir-656-3p	RORA
hsa-mir-656-3p	CXCL5
hsa-mir-656-3p	SEMA3F
hsa-mir-656-3p	SLC16A1
hsa-mir-656-3p	SRP9
hsa-mir-656-3p	STRN
hsa-mir-656-3p	TMBIM6
hsa-mir-656-3p	TFRC
hsa-mir-656-3p	NR2C2
hsa-mir-656-3p	UGT2B4
hsa-mir-656-3p	ZNF138
hsa-mir-656-3p	ZXDA
hsa-mir-656-3p	FZD5
hsa-mir-656-3p	PTP4A2
hsa-mir-656-3p	NRIP1
hsa-mir-656-3p	BRAP
hsa-mir-656-3p	TAGLN2
hsa-mir-656-3p	CUL2
hsa-mir-656-3p	TNFSF9
hsa-mir-656-3p	BUB3
hsa-mir-656-3p	CRIPT
hsa-mir-656-3p	SH3BP5
hsa-mir-656-3p	SCAMP1
hsa-mir-656-3p	KIAA0408
hsa-mir-656-3p	STARD8
hsa-mir-656-3p	SPATA2
hsa-mir-656-3p	RNF41
hsa-mir-656-3p	AKAP8
hsa-mir-656-3p	WARS2
hsa-mir-656-3p	ZBTB18
hsa-mir-656-3p	SYNCRIP
hsa-mir-656-3p	EXOC5
hsa-mir-656-3p	RAI1
hsa-mir-656-3p	ZNF460
hsa-mir-656-3p	AKAP11
hsa-mir-656-3p	RAB3GAP1
hsa-mir-656-3p	HIC2
hsa-mir-656-3p	PHF8
hsa-mir-656-3p	ARL6IP1
hsa-mir-656-3p	NEDD4L
hsa-mir-656-3p	SIK3
hsa-mir-656-3p	RABGAP1
hsa-mir-656-3p	MGAT4C
hsa-mir-656-3p	ZDHHC5
hsa-mir-656-3p	SAR1B
hsa-mir-656-3p	CRIM1
hsa-mir-656-3p	ZBTB7A
hsa-mir-656-3p	CCSER2
hsa-mir-656-3p	PRMT7
hsa-mir-656-3p	ALKBH5
hsa-mir-656-3p	SLC35F6
hsa-mir-656-3p	ARGLU1
hsa-mir-656-3p	FBXW7
hsa-mir-656-3p	TMEM30A
hsa-mir-656-3p	ASH1L
hsa-mir-656-3p	AJAP1
hsa-mir-656-3p	TM9SF3
hsa-mir-656-3p	ARID1B
hsa-mir-656-3p	NUFIP2
hsa-mir-656-3p	JCAD
hsa-mir-656-3p	BACH2
hsa-mir-656-3p	AASDHPPT
hsa-mir-656-3p	SCOC
hsa-mir-656-3p	RRAGC
hsa-mir-656-3p	HERPUD2
hsa-mir-656-3p	IKZF4
hsa-mir-656-3p	HHIP
hsa-mir-656-3p	LRRC31
hsa-mir-656-3p	METTL8
hsa-mir-656-3p	LONRF3
hsa-mir-656-3p	ZNF703
hsa-mir-656-3p	SPSB1
hsa-mir-656-3p	COQ10B
hsa-mir-656-3p	TTYH3
hsa-mir-656-3p	TRIM8
hsa-mir-656-3p	KATNAL1
hsa-mir-656-3p	ARID5B
hsa-mir-656-3p	ZNF607
hsa-mir-656-3p	LMNB2
hsa-mir-656-3p	TTC8
hsa-mir-656-3p	DNAJC21
hsa-mir-656-3p	AMER1
hsa-mir-656-3p	SPIN4
hsa-mir-656-3p	BRI3BP
hsa-mir-656-3p	C18orf25
hsa-mir-656-3p	EXOC8
hsa-mir-656-3p	CCDC80
hsa-mir-656-3p	ARSK
hsa-mir-656-3p	DGKH
hsa-mir-656-3p	ITPRIPL2
hsa-mir-656-3p	SVIP
hsa-mir-656-3p	LIN9
hsa-mir-656-3p	FAM19A1
hsa-mir-656-3p	ZFP62
hsa-mir-656-3p	C16orf52
hsa-mir-656-3p	TMEM178B
hsa-mir-656-5p	AP2B1
hsa-mir-656-5p	LPP
hsa-mir-656-5p	MECP2
hsa-mir-656-5p	NDUFA2
hsa-mir-656-5p	VCL
hsa-mir-656-5p	FXR1
hsa-mir-656-5p	STC2
hsa-mir-656-5p	PEA15
hsa-mir-656-5p	STK17B
hsa-mir-656-5p	TRIM14
hsa-mir-656-5p	G3BP2
hsa-mir-656-5p	PALLD
hsa-mir-656-5p	LEPROTL1
hsa-mir-656-5p	RPUSD2
hsa-mir-656-5p	RAB30
hsa-mir-656-5p	ZBTB7A
hsa-mir-656-5p	UBE2D4
hsa-mir-656-5p	SIX4
hsa-mir-656-5p	CHAC1
hsa-mir-656-5p	C3orf36
hsa-mir-656-5p	PNPLA3
hsa-mir-656-5p	CEP89
hsa-mir-656-5p	HIST1H2BK
hsa-mir-656-5p	HSPB6
hsa-mir-656-5p	SPIN4
hsa-mir-656-5p	UBE2F
hsa-mir-656-5p	SMCR8
hsa-mir-656-5p	VKORC1L1
hsa-mir-656-5p	SGMS1
