# Supplementary material for: Identification of keygenes, miRNAs and miRNA-mRNA regulatory pathways for chemotherapy resistance in ovarian cancer
Source: PeerJ. 2021 Nov 8;9:e12353. doi: 10.7717/peerj.12353 (PMC8582303; doi:10.7717/peerj.12353)
Supplement: Supplemental Information 2 [file peerj-09-12353-s002.xlsx]

## Sheet: DEGs
ID	logFC	P.Value	adj.P.Val	t	Gene symbol	B	SPOT_ID	GB_ACC
A_23_P252608	-0.592	0.00104	0.038289	-3.48	GSTA5	-0.87717	A_23_P252608	AK024483
A_23_P417111	-0.689	0.00067	0.030712	-3.62	GSTA1	-0.48152	A_23_P417111	BC011923
A_23_P873	0.896	0.000904	0.035745	3.53	SCG5	-0.75182	A_23_P873	BC031655
A_23_P251271	-0.576	0.000216	0.016477	-3.98	C1orf109	0.54256	A_23_P251271	M31659
A_23_P207650	0.647	0.000205	0.016054	4	FOLR1	0.58806	A_23_P207650	NM_000018
A_23_P102202	-0.523	7.08e-05	0.008405	-4.33	MACROD2	1.55766	A_23_P102202	NM_000179
A_23_P10031	-0.741	1.82e-05	0.003916	-4.73	C2orf88	2.79797	A_23_P10031	NM_000381
A_23_P46936	1.72	0.000634	0.03027	3.64	HIST1H4B	-0.43176	A_23_P46936	NM_000399
A_23_P26457	1.16	0.00017	0.014286	4.06	HIST1H4C	0.76176	A_23_P26457	NM_000517
A_23_P203558	2.19	0.000142	0.012846	4.11	CENPN	0.92323	A_23_P203558	NM_000518
A_23_P37856	1.03	0.000178	0.014629	4.04	CDCA7	0.71775	A_23_P37856	NM_000558
A_23_P64538	1.01	0.000948	0.03641	3.51	PSPH	-0.79455	A_23_P64538	NM_000559
A_23_P79518	0.651	0.00081	0.033962	3.56	ASNS	-0.65248	A_23_P79518	NM_000576
A_23_P251680	0.602	0.00026	0.017901	3.93	HIST1H4I	0.37348	A_23_P251680	NM_000754
A_23_P202658	-0.511	0.000516	0.026537	-3.71	NSMCE3	-0.24536	A_23_P202658	NM_000852
A_23_P146554	1.45	3.07e-05	0.005543	4.58	STYK1	2.3232	A_23_P146554	NM_000954
A_23_P78092	0.619	0.00034	0.021315	3.84	ZBTB38	0.13024	A_23_P78092	NM_001003927
A_23_P129786	0.594	0.000284	0.018835	3.9	CKS2	0.29313	A_23_P129786	NM_001005291
A_23_P8473	-0.758	1.76e-05	0.00383	-4.74	SIGLEC11	2.83061	A_23_P8473	NM_001009955
A_23_P86012	-0.562	0.000719	0.031786	-3.6	SNRPE	-0.54537	A_23_P86012	NM_001017402
A_23_P33733	0.562	0.000492	0.02581	3.72	LAMC2	-0.20292	A_23_P33733	NM_001017915
A_23_P100868	-0.563	0.000159	0.013808	-4.08	STC2	0.82111	A_23_P100868	NM_001033580
A_23_P210063	-1.13	7.61e-06	0.002553	-4.98	HIST1H2BE	3.59902	A_23_P210063	NM_001042519
A_23_P380076	-0.831	0.000192	0.015213	-4.02	HIST1H4L	0.65023	A_23_P380076	NM_001080412
A_23_P203391	-0.556	2.15e-06	0.001219	-5.34	FGF7P6	4.75779	A_23_P203391	NM_001083926
A_23_P148114	0.949	0.000413	0.023579	3.78	HILPDA	-0.04518	A_23_P148114	NM_001099409
A_23_P151075	0.508	0.00113	0.040039	3.45	HIST1H2BC	-0.95353	A_23_P151075	NM_001175
A_23_P82669	-0.55	7.08e-06	0.002497	-5.01	SSBP3	3.66636	A_23_P82669	NM_001483
A_23_P203173	0.98	0.0011	0.039424	3.46	ERICH5	-0.92794	A_23_P203173	NM_001558
A_23_P145694	-0.881	1.04e-05	0.002991	-4.89	MID1	3.31259	A_23_P145694	NM_001673
A_23_P71727	-0.824	1.29e-06	0.001162	-5.49	EPCAM	5.23104	A_23_P71727	NM_001827
A_23_P159650	-0.512	6.88e-05	0.008405	-4.34	POU2F1	1.58458	A_23_P159650	NM_001866
A_23_P89246	0.617	0.000322	0.020574	3.86	TMEM139	0.18012	A_23_P89246	NM_002086
A_23_P56922	-0.5	1.14e-05	0.003177	-4.87	HIST1H2BN	3.22511	A_23_P56922	NM_002157
A_23_P128520	0.631	0.000436	0.024623	3.76	MRPS17	-0.09392	A_23_P128520	NM_002178
A_23_P91081	-0.707	4.1e-06	0.001785	-5.16	RAB38	4.16599	A_23_P91081	NM_002354
A_23_P51009	-0.638	1.33e-05	0.00352	-4.82	BUB1	3.08479	A_23_P51009	NM_002491
A_23_P209678	1.1	4.67e-05	0.007007	4.45	HIST1H4H	1.93888	A_23_P209678	NM_002664
A_23_P161607	-0.505	5.21e-06	0.002044	-5.09	RBM33	3.94761	A_23_P161607	NM_002689
A_23_P97130	-0.707	1.41e-05	0.003555	-4.8	ACAT2	3.03178	A_23_P97130	NM_002697
A_23_P89431	1.78	0.00145	0.047643	3.37	LGR5	-1.17764	A_23_P89431	NM_002982
A_23_P73480	-1.27	0.00093	0.036365	-3.52	SPC25	-0.77656	A_23_P73480	NM_003020
A_23_P126291	-0.803	0.00151	0.048869	-3.36	NDUFA1	-1.20944	A_23_P126291	NM_003094
A_23_P81612	-0.542	8.97e-05	0.009692	-4.26	PYCR1	1.34215	A_23_P81612	NM_003135
A_23_P31534	-0.591	5.74e-05	0.007663	-4.39	CDCA2	1.74996	A_23_P31534	NM_003143
A_23_P154938	0.641	0.000953	0.036435	3.51	EML4	-0.79906	A_23_P154938	NM_003325
A_23_P101721	-0.572	4.07e-05	0.006646	-4.49	MPZL1	2.0629	A_23_P101721	NM_003425
A_23_P361347	-0.875	5.12e-06	0.002044	-5.1	PURB	3.96243	A_23_P361347	NM_003495
A_23_P402081	-0.703	0.000701	0.031609	-3.61	FAM162A	-0.52276	A_23_P402081	NM_003520
A_23_P40470	-0.791	0.000935	0.036365	-3.51	NDC80	-0.78162	A_23_P40470	NM_003523
A_23_P93180	-0.763	0.000488	0.02581	-3.73	GOLT1A	-0.19659	A_23_P93180	NM_003526
A_23_P359540	-0.583	0.000842	0.034704	-3.55	WAC	-0.68781	A_23_P359540	NM_003540
A_23_P214484	-0.971	8.26e-06	0.002695	-4.96	NDUFB3	3.52427	A_23_P214484	NM_003542
A_23_P323685	-0.694	0.000763	0.033084	-3.58	ZNF395	-0.59862	A_23_P323685	NM_003543
A_23_P81850	-1.05	3.68e-05	0.006243	-4.52	F11R	2.15482	A_23_P81850	NM_003544
A_23_P70480	-0.788	2.54e-05	0.004809	-4.63	UBL5	2.49528	A_23_P70480	NM_003546
A_23_P98979	-0.679	7.59e-07	0.00111	-5.64	CNIH4	5.71559	A_23_P98979	NM_003667
A_23_P110685	-0.799	2.67e-07	0.000614	-5.93	SGPP2	6.67459	A_23_P110685	NM_003714
A_23_P11874	-0.659	8.73e-08	0.000351	-6.24	RFC5	7.70011	A_23_P11874	NM_003953
A_23_P207058	2.6	0.00143	0.047215	3.37	NUP43	-1.16169	A_23_P207058	NM_003955
A_23_P34650	0.686	0.000925	0.03632	3.52	PRDM4	-0.77242	A_23_P34650	NM_004001
A_23_P51646	1.14	0.000788	0.033411	3.57	SEC61G	-0.6279	A_23_P51646	NM_004073
A_23_P111206	-0.509	0.00152	0.04913	-3.35	AJUBA	-1.21601	A_23_P111206	NM_004117
A_23_P33723	0.649	0.00106	0.038589	3.47	TMEM136	-0.89608	A_23_P33723	NM_004244
A_23_P207760	0.721	0.000411	0.02356	3.78	SIVA1	-0.03977	A_23_P207760	NM_004309
A_23_P124417	-0.699	1.84e-06	0.001186	-5.39	ZNF48	4.90164	A_23_P124417	NM_004336
A_23_P87832	-0.519	4.25e-05	0.006768	-4.48	FBXW4P1	2.02492	A_23_P87832	NM_004373
A_23_P108842	0.515	6.97e-05	0.008405	4.33	SSBP1	1.57252	A_23_P108842	NM_004418
A_23_P150016	0.934	0.000569	0.028112	3.68	TMEM106C	-0.3351	A_23_P150016	NM_004419
A_23_P117933	-0.511	0.000674	0.030827	-3.62	POP7	-0.48746	A_23_P117933	NM_004483
A_23_P159833	-0.669	0.000682	0.031044	-3.62	HIST1H4F	-0.49744	A_23_P159833	NM_004541
A_23_P202810	0.543	0.000537	0.027016	3.7	MYCBP	-0.28242	A_23_P202810	NM_004561
A_23_P251984	-0.883	0.001	0.037505	-3.49	HINT1	-0.84409	A_23_P251984	NM_004577
A_23_P65757	-0.507	0.00135	0.045356	-3.39	CRIPT	-1.11142	A_23_P65757	NM_004701
A_23_P205281	-0.563	0.000421	0.023927	-3.77	TCEB1	-0.06163	A_23_P205281	NM_004894
A_23_P126925	-0.531	0.000401	0.02323	-3.79	SLC25A16	-0.01876	A_23_P126925	NM_005066
A_23_P411296	1.07	5.51e-05	0.007575	4.4	ZNF45	1.78763	A_23_P411296	NM_005194
A_23_P252832	-0.582	1.56e-06	0.001162	-5.44	SCFD1	5.05579	A_23_P252832	NM_005340
A_23_P201636	-0.801	0.000716	0.031786	-3.6	CHCHD2	-0.54144	A_23_P201636	NM_005562
A_23_P70818	-0.531	0.000171	0.014286	-4.06	TRAPPC6A	0.75596	A_23_P70818	NM_005631
A_23_P60028	-0.578	0.000107	0.010608	-4.2	TRUB1	1.18364	A_23_P60028	NM_005648
A_23_P123814	-0.514	0.000962	0.036465	-3.51	SOX17	-0.80761	A_23_P123814	NM_005833
A_23_P134274	-0.585	4.98e-05	0.007037	-4.43	PTPMT1	1.8791	A_23_P134274	NM_005837
A_23_P93260	-0.558	0.0001	0.010362	-4.22	MYO19	1.2394	A_23_P93260	NM_005865
A_23_P383835	-0.687	9.71e-06	0.002991	-4.91	C14orf2	3.37655	A_23_P383835	NM_005891
A_23_P254756	0.673	0.00126	0.043003	3.42	KIF2C	-1.04859	A_23_P254756	NM_006016
A_23_P50108	-0.645	6.28e-05	0.008218	-4.36	LAMB3	1.66768	A_23_P50108	NM_006101
A_23_P127584	1.04	0.000145	0.012991	4.11	ZNF14	0.90318	A_23_P127584	NM_006169
A_23_P205456	-0.6	1.57e-06	0.001162	-5.43	TP53TG1	5.05061	A_23_P205456	NM_006427
A_23_P72117	0.875	0.00147	0.048175	3.36	H2AFV	-1.18938	A_23_P72117	NM_006714
A_23_P86283	0.959	9.21e-05	0.00982	4.25	NUF2	1.31805	A_23_P86283	NM_006762
A_23_P145074	0.704	0.000467	0.025364	3.74	PRSS16	-0.15535	A_23_P145074	NM_006813
A_23_P45870	0.635	0.000202	0.015885	4.01	LRRC59	0.60206	A_23_P45870	NM_006820
A_23_P103631	-0.533	8.37e-06	0.002695	-4.96	ASRGL1	3.51199	A_23_P103631	NM_006824
A_23_P34788	-0.563	2.99e-05	0.005486	-4.58	SYT13	2.34491	A_23_P34788	NM_006845
A_23_P130194	-0.665	0.000126	0.01182	-4.15	GBAS	1.03585	A_23_P130194	NM_006907
A_23_P217269	0.865	0.00105	0.038397	3.48	NASP	-0.8838	A_23_P217269	NM_007268
A_23_P66891	0.501	0.000121	0.011487	4.16	DNAJC15	1.06724	A_23_P66891	NM_012121
A_23_P201655	-0.583	0.000226	0.016765	-3.97	TSEN15	0.50145	A_23_P201655	NM_012333
A_23_P117145	-0.609	7.79e-05	0.008782	-4.3	SRP19	1.47098	A_23_P117145	NM_012406
A_23_P145904	-0.56	1.29e-06	0.001162	-5.49	MELK	5.22568	A_23_P145904	NM_012412
A_23_P117190	-0.546	0.00136	0.045438	-3.39	ZNF777	-1.11734	A_23_P117190	NM_013238
A_23_P20022	-0.776	0.000823	0.034137	-3.56	EBNA1BP2	-0.66704	A_23_P20022	NM_013332
A_23_P72830	0.682	0.000522	0.026665	3.71	PCDHB2	-0.25637	A_23_P72830	NM_013379
A_23_P142634	-0.501	0.000209	0.016248	-4	SFPQ	0.57274	A_23_P142634	NM_014168
A_23_P17219	-0.579	0.000374	0.022696	-3.81	SMO	0.04566	A_23_P17219	NM_014171
A_23_P200507	-0.625	1.88e-05	0.003944	-4.72	TRIM24	2.77143	A_23_P200507	NM_014184
A_23_P71241	-0.607	5.01e-05	0.007037	-4.43	TRIAP1	1.87442	A_23_P71241	NM_014302
A_23_P256542	-0.656	4.04e-05	0.006646	-4.5	MSH6	2.07094	A_23_P256542	NM_014367
A_23_P24843	0.604	0.000663	0.030558	3.63	CIART	-0.47211	A_23_P24843	NM_014632
A_23_P94422	-0.541	3.29e-05	0.005762	-4.56	YEATS2	2.25747	A_23_P94422	NM_014791
A_23_P116533	0.529	0.000655	0.030558	3.63	COX6A1	-0.46105	A_23_P116533	NM_015055
A_23_P32499	1.12	0.0011	0.039424	3.46	RSRC1	-0.93097	A_23_P32499	NM_015136
A_23_P218858	0.575	0.000215	0.01645	3.99	RABEPK	0.54846	A_23_P218858	NM_015429
A_23_P67198	0.857	0.000935	0.036365	3.51	COX7B	-0.7815	A_23_P67198	NM_015692
A_23_P309803	-0.538	4.74e-05	0.007007	-4.45	GSTP1	1.92534	A_23_P309803	NM_015694
A_23_P93629	-0.531	0.000283	0.018835	-3.9	GCSH	0.29641	A_23_P93629	NM_015905
A_23_P258321	-0.7	5.73e-06	0.002143	-5.07	FKBP5	3.8604	A_23_P258321	NM_015969
A_23_P83492	0.513	0.00101	0.037532	3.49	MRPS33	-0.85305	A_23_P83492	NM_016033
A_23_P157352	-0.509	0.000492	0.02581	-3.72	CCNB2	-0.20317	A_23_P157352	NM_016071
A_23_P88209	-0.572	7.28e-05	0.008442	-4.32	POLA2	1.53281	A_23_P88209	NM_016106
A_23_P157405	-0.569	8.79e-06	0.002772	-4.94	PSAT1	3.46784	A_23_P157405	NM_016139
A_23_P128403	-0.528	1.74e-06	0.001186	-5.4	METTL5	4.95193	A_23_P128403	NM_016399
A_23_P158794	-0.515	1.53e-06	0.001162	-5.44	HSPE1	5.07272	A_23_P158794	NM_016625
A_23_P201996	-0.64	5.45e-06	0.002089	-5.08	CDC42EP4	3.90565	A_23_P201996	NM_016628
A_23_P53176	-1.19	0.000473	0.025392	-3.74	CMTM7	-0.16701	A_23_P53176	NM_016725
A_23_P503042	-0.635	3.4e-06	0.001612	-5.22	ARHGDIB	4.3399	A_23_P503042	NM_016946
A_23_P45970	-1.25	4.85e-05	0.007037	-4.44	FCGR2A	1.90305	A_23_P45970	NM_017850
A_23_P69437	-0.52	1.25e-05	0.003352	-4.84	RMDN1	3.14472	A_23_P69437	NM_018023
A_23_P13822	-0.836	1.72e-05	0.003825	-4.75	DUSP2	2.85062	A_23_P13822	NM_018423
A_23_P88740	-0.938	1.22e-05	0.00334	-4.85	SWAP70	3.1636	A_23_P88740	NM_018455
A_23_P207481	-0.558	8.75e-05	0.009612	-4.26	OVOL1	1.36476	A_23_P207481	NM_018509
A_23_P146077	-0.637	5.61e-05	0.007647	-4.4	CARD9	1.77026	A_23_P146077	NM_018660
A_23_P213375	-0.532	0.00137	0.045588	-3.39	INPP5D	-1.12343	A_23_P213375	NM_018936
A_23_P143127	-0.661	1.63e-05	0.003753	-4.76	COG7	2.9	A_23_P143127	NM_019063
A_23_P51085	-0.678	7.8e-05	0.008782	-4.3	ZNF385B	1.4696	A_23_P51085	NM_020675
A_23_P161659	-0.552	0.000263	0.017953	-3.92	DIDO1	0.36314	A_23_P161659	NM_020826
A_23_P101811	-0.561	3.31e-08	0.000178	-6.51	ABI3BP	8.58792	A_23_P101811	NM_021030
A_23_P85716	0.509	4.09e-05	0.006646	4.49	C1orf162	2.0599	A_23_P85716	NM_021642
A_23_P359596	0.574	0.00103	0.037857	3.48	HAVCR2	-0.86492	A_23_P359596	NM_022105
A_23_P161559	-0.7	2.43e-08	0.000178	-6.59	SREBF1	8.87208	A_23_P161559	NM_022337
A_23_P82775	-0.564	0.000721	0.031786	-3.6	IFI6	-0.54775	A_23_P82775	NM_022454
A_23_P201459	0.598	0.00153	0.049603	3.35	COMT	-1.22638	A_23_P201459	NM_022873
A_23_P49256	0.686	0.000828	0.03425	3.55	MICAL2	-0.67234	A_23_P49256	NM_024042
A_23_P48175	-0.587	0.00116	0.040514	-3.44	GRB2	-0.97585	A_23_P48175	NM_024056
A_23_P329202	-0.568	0.000238	0.01733	-3.95	EVI2A	0.45478	A_23_P329202	NM_024108
A_23_P78563	-0.628	2.51e-05	0.004809	-4.64	IGFBP6	2.50485	A_23_P78563	NM_024292
A_23_P212089	1.41	0.00136	0.045438	3.39	IFI44L	-1.117	A_23_P212089	NM_031419
A_23_P251421	-0.928	0.00016	0.013808	-4.08	HIRA	0.813	A_23_P251421	NM_031942
A_23_P14886	0.647	0.000372	0.022671	3.81	ACADVL	0.05028	A_23_P14886	NM_032520
A_23_P18902	0.591	0.000775	0.033282	3.58	GNPTG	-0.61352	A_23_P18902	NM_032782
A_23_P54055	-0.602	0.000468	0.025364	-3.74	CD163	-0.158	A_23_P54055	NM_032876
A_23_P134517	-0.657	5.13e-05	0.007113	-4.42	IL1B	1.85303	A_23_P134517	NM_033224
A_23_P500433	0.544	0.00039	0.022983	3.8	CCDC117	0.00735	A_23_P500433	NM_052813
A_23_P119322	-0.806	0.000943	0.03641	-3.51	CD164	-0.78966	A_23_P119322	NM_052884
A_23_P104022	-0.546	1.1e-06	0.001162	-5.54	DPP7	5.37778	A_23_P104022	NM_052965
A_23_P259692	-0.505	0.000814	0.033962	-3.56	FCGR2B	-0.65765	A_23_P259692	NM_058179
A_23_P22398	-1.17	0.00095	0.03641	-3.51	METRN	-0.7963	A_23_P22398	NM_080676
A_23_P256413	0.503	0.000385	0.022925	3.8	MALAT1	0.01817	A_23_P256413	NM_138410
A_23_P117862	-0.869	0.00135	0.045356	-3.39	PNRC1	-1.11131	A_23_P117862	NM_138704
A_23_P63908	-0.568	0.000906	0.035745	-3.53	ARHGDIA	-0.75368	A_23_P63908	NM_139169
A_23_P410712	-0.521	8.34e-05	0.009257	-4.28	ARID5A	1.40887	A_23_P410712	NM_144697
A_23_P500000	1.06	0.000446	0.024856	3.76	CPAMD8	-0.11406	A_23_P500000	NM_144777
A_23_P323270	1.85	0.000656	0.030558	3.63	VSIG4	-0.46333	A_23_P323270	NM_145260
A_23_P74349	-0.56	0.000529	0.026797	-3.7	SMPDL3A	-0.26826	A_23_P74349	NM_145697
A_23_P135417	-1.47	9.31e-05	0.009853	-4.24	THEMIS2	1.30896	A_23_P135417	NM_145740
A_23_P153970	-0.625	2.8e-06	0.00144	-5.27	DUSP5	4.51675	A_23_P153970	NM_152386
A_23_P334850	0.567	0.000516	0.026537	3.71	EHBP1L1	-0.24627	A_23_P334850	NM_152520
A_23_P385861	-0.663	2.29e-07	0.000614	-5.97	LAPTM5	6.81592	A_23_P385861	NM_152562
A_23_P415643	-0.594	3.07e-08	0.000178	-6.53	IL10RA	8.65767	A_23_P415643	NM_152652
A_23_P42908	-0.705	7.03e-05	0.008405	-4.33	HBG1	1.5653	A_23_P42908	NM_153345
A_23_P329361	0.566	0.00113	0.039984	3.45	HBA1	-0.94973	A_23_P329361	NM_153603
A_23_P93141	-1.54	0.000182	0.01486	-4.04	NNMT	0.69722	A_23_P93141	NM_153699
A_23_P34794	-0.55	0.00016	0.013808	-4.08	SCEL	0.81563	A_23_P34794	NM_172164
A_23_P432034	0.669	0.00145	0.047561	3.37	CEBPB	-1.17426	A_23_P432034	NM_173510
A_23_P333029	-0.752	0.000395	0.023095	-3.79	STAT3	-0.00367	A_23_P333029	NM_173549
A_23_P412562	0.577	0.000411	0.02356	3.78	PLEK	-0.04121	A_23_P412562	NM_174896
A_23_P329890	-0.601	0.000578	0.028294	-3.67	STAB1	-0.34918	A_23_P329890	NM_174926
A_23_P1549	-0.564	0.000661	0.030558	-3.63	PLK3	-0.46901	A_23_P1549	NM_175732
A_23_P95302	-0.621	2.8e-06	0.00144	-5.27	HBA2	4.51576	A_23_P95302	NM_181578
A_23_P137675	-0.644	5.76e-05	0.007663	-4.39	NFKBIZ	1.74643	A_23_P137675	NM_198447
A_23_P31055	-0.611	0.000495	0.02581	-3.72	PTGDS	-0.20792	A_23_P31055	NM_198887
A_23_P143016	0.748	0.000308	0.019965	3.87	EGR2	0.22186	A_23_P143016	NM_212481
A_23_P100790	1.07	0.000225	0.016732	3.97	CCL2	0.50743	A_23_P100790	NM_213662
A_23_P21150	0.695	0.00107	0.038822	3.47	OSR1	-0.90588	A_23_P21150	NR_002819
A_23_P369449	-0.786	0.000118	0.011213	-4.17	HBB	1.09452	A_23_P369449	NR_003674
A_23_P145895	-0.561	1.59e-06	0.001162	-5.43	SOCS3	5.0373	A_23_P145895	NR_015381
