# Supplementary material for: Identification of keygenes, miRNAs and miRNA-mRNA regulatory pathways for chemotherapy resistance in ovarian cancer
Source: PeerJ. 2021 Nov 8;9:e12353. doi: 10.7717/peerj.12353 (PMC8582303; doi:10.7717/peerj.12353)
Supplement: Supplemental Information 3 [file peerj-09-12353-s003.xls]

## Sheet: Sample Setup
Block Type	96-Well 0.2-mL Block
Calibration Background is expired	No
Calibration Background performed on	09-09-2019
Calibration Pure Dye ABY is expired	No
Calibration Pure Dye ABY performed on	09-09-2019
Calibration Pure Dye FAM is expired	No
Calibration Pure Dye FAM performed on	09-09-2019
Calibration Pure Dye JUN is expired	No
Calibration Pure Dye JUN performed on	09-09-2019
Calibration Pure Dye NED is expired	No
Calibration Pure Dye NED performed on	09-09-2019
Calibration Pure Dye ROX is expired	No
Calibration Pure Dye ROX performed on	09-09-2019
Calibration Pure Dye SYBR is expired	No
Calibration Pure Dye SYBR performed on	09-09-2019
Calibration Pure Dye TAMRA is expired	No
Calibration Pure Dye TAMRA performed on	09-09-2019
Calibration Pure Dye VIC is expired	No
Calibration Pure Dye VIC performed on	09-09-2019
Calibration ROI is expired	No
Calibration ROI performed on	09-09-2019
Calibration Uniformity is expired	No
Calibration Uniformity performed on	09-09-2019
Chemistry	SYBR_GREEN
Date Created	2021-04-26 22:51:24 PM PDT
Experiment Barcode
Experiment Comment
Experiment File Name	D:\WWW\2021-04-26_205009.eds
Experiment Name	2021-04-26_205009
Experiment Run End Time	2021-04-26 15:32:46 PM PDT
Experiment Type	Comparative Cт (ΔΔCт)
Instrument Name	2763219080101
Instrument Serial Number	2763219080101
Instrument Type	QuantStudio™ 3 System
Passive Reference	ROX
Post-read Stage/Step
Pre-read Stage/Step
Quantification Cycle Method	Ct
Signal Smoothing On	true
Stage where Melt Analysis is performed	Stage3
Stage/ Cycle where Ct Analysis is performed	Stage2, Step2
User Name
Well	Well Position	Sample Name	Sample Color	Biogroup Name	Biogroup Color	Target Name	Target Color	Task	Reporter	Quencher	Quantity	Comments
1	A1	AT0	RGB(0,139,69)			kif2c	RGB(0,0,255)	UNKNOWN	SYBR	None
2	A2	AT0	RGB(0,139,69)			kif2c	RGB(0,0,255)	UNKNOWN	SYBR	None
3	A3	AT0	RGB(0,139,69)			kif2c	RGB(0,0,255)	UNKNOWN	SYBR	None
4	A4	AT0	RGB(0,139,69)			GAPDH	RGB(139,137,112)	UNKNOWN	SYBR	None
5	A5	AT0	RGB(0,139,69)			GAPDH	RGB(139,137,112)	UNKNOWN	SYBR	None
6	A6	AT0	RGB(0,139,69)			GAPDH	RGB(139,137,112)	UNKNOWN	SYBR	None
7	A7
8	A8
9	A9
10	A10
11	A11
12	A12
13	B1	AT1	RGB(255,127,0)			kif2c	RGB(0,0,255)	UNKNOWN	SYBR	None
14	B2	AT1	RGB(255,127,0)			kif2c	RGB(0,0,255)	UNKNOWN	SYBR	None
15	B3	AT1	RGB(255,127,0)			kif2c	RGB(0,0,255)	UNKNOWN	SYBR	None
16	B4	AT1	RGB(255,127,0)			GAPDH	RGB(139,137,112)	UNKNOWN	SYBR	None
17	B5	AT1	RGB(255,127,0)			GAPDH	RGB(139,137,112)	UNKNOWN	SYBR	None
18	B6	AT1	RGB(255,127,0)			GAPDH	RGB(139,137,112)	UNKNOWN	SYBR	None
19	B7
20	B8
21	B9
22	B10
23	B11
24	B12
25	C1	AT2	RGB(198,113,113)			kif2c	RGB(0,0,255)	UNKNOWN	SYBR	None
26	C2	AT2	RGB(198,113,113)			kif2c	RGB(0,0,255)	UNKNOWN	SYBR	None
27	C3	AT2	RGB(198,113,113)			kif2c	RGB(0,0,255)	UNKNOWN	SYBR	None
28	C4	AT2	RGB(198,113,113)			GAPDH	RGB(139,137,112)	UNKNOWN	SYBR	None
29	C5	AT2	RGB(198,113,113)			GAPDH	RGB(139,137,112)	UNKNOWN	SYBR	None
30	C6	AT2	RGB(198,113,113)			GAPDH	RGB(139,137,112)	UNKNOWN	SYBR	None
31	C7
32	C8
33	C9
34	C10
35	C11
36	C12
37	D1	AC0	RGB(0,245,255)			kif2c	RGB(0,0,255)	UNKNOWN	SYBR	None
38	D2	AC0	RGB(0,245,255)			kif2c	RGB(0,0,255)	UNKNOWN	SYBR	None
39	D3	AC0	RGB(0,245,255)			kif2c	RGB(0,0,255)	UNKNOWN	SYBR	None
40	D4	AC0	RGB(0,245,255)			GAPDH	RGB(139,137,112)	UNKNOWN	SYBR	None
41	D5	AC0	RGB(0,245,255)			GAPDH	RGB(139,137,112)	UNKNOWN	SYBR	None
42	D6	AC0	RGB(0,245,255)			GAPDH	RGB(139,137,112)	UNKNOWN	SYBR	None
43	D7
44	D8
45	D9
46	D10
47	D11
48	D12
49	E1	AC1	RGB(238,220,130)			kif2c	RGB(0,0,255)	UNKNOWN	SYBR	None
50	E2	AC1	RGB(238,220,130)			kif2c	RGB(0,0,255)	UNKNOWN	SYBR	None
51	E3	AC1	RGB(238,220,130)			kif2c	RGB(0,0,255)	UNKNOWN	SYBR	None
52	E4	AC1	RGB(238,220,130)			GAPDH	RGB(139,137,112)	UNKNOWN	SYBR	None
53	E5	AC1	RGB(238,220,130)			GAPDH	RGB(139,137,112)	UNKNOWN	SYBR	None
54	E6	AC1	RGB(238,220,130)			GAPDH	RGB(139,137,112)	UNKNOWN	SYBR	None
55	E7
56	E8
57	E9
58	E10
59	E11
60	E12
61	F1	AC2	RGB(238,238,0)			kif2c	RGB(0,0,255)	UNKNOWN	SYBR	None
62	F2	AC2	RGB(238,238,0)			kif2c	RGB(0,0,255)	UNKNOWN	SYBR	None
63	F3	AC2	RGB(238,238,0)			kif2c	RGB(0,0,255)	UNKNOWN	SYBR	None
64	F4	AC2	RGB(238,238,0)			GAPDH	RGB(139,137,112)	UNKNOWN	SYBR	None
65	F5	AC2	RGB(238,238,0)			GAPDH	RGB(139,137,112)	UNKNOWN	SYBR	None
66	F6	AC2	RGB(238,238,0)			GAPDH	RGB(139,137,112)	UNKNOWN	SYBR	None
67	F7
68	F8
69	F9
70	F10
71	F11
72	F12
73	G1
74	G2
75	G3
76	G4
77	G5
78	G6
79	G7
80	G8
81	G9
82	G10
83	G11
84	G12
85	H1
86	H2
87	H3
88	H4
89	H5
90	H6
91	H7
92	H8
93	H9
94	H10
95	H11
96	H12

## Sheet: Amplification Data
Block Type	96-Well 0.2-mL Block
Calibration Background is expired	No
Calibration Background performed on	09-09-2019
Calibration Pure Dye ABY is expired	No
Calibration Pure Dye ABY performed on	09-09-2019
Calibration Pure Dye FAM is expired	No
Calibration Pure Dye FAM performed on	09-09-2019
Calibration Pure Dye JUN is expired	No
Calibration Pure Dye JUN performed on	09-09-2019
Calibration Pure Dye NED is expired	No
Calibration Pure Dye NED performed on	09-09-2019
Calibration Pure Dye ROX is expired	No
Calibration Pure Dye ROX performed on	09-09-2019
Calibration Pure Dye SYBR is expired	No
Calibration Pure Dye SYBR performed on	09-09-2019
Calibration Pure Dye TAMRA is expired	No
Calibration Pure Dye TAMRA performed on	09-09-2019
Calibration Pure Dye VIC is expired	No
Calibration Pure Dye VIC performed on	09-09-2019
Calibration ROI is expired	No
Calibration ROI performed on	09-09-2019
Calibration Uniformity is expired	No
Calibration Uniformity performed on	09-09-2019
Chemistry	SYBR_GREEN
Date Created	2021-04-26 22:51:24 PM PDT
Experiment Barcode
Experiment Comment
Experiment File Name	D:\WWW\2021-04-26_205009.eds
Experiment Name	2021-04-26_205009
Experiment Run End Time	2021-04-26 15:32:46 PM PDT
Experiment Type	Comparative Cт (ΔΔCт)
Instrument Name	2763219080101
Instrument Serial Number	2763219080101
Instrument Type	QuantStudio™ 3 System
Passive Reference	ROX
Post-read Stage/Step
Pre-read Stage/Step
Quantification Cycle Method	Ct
Signal Smoothing On	true
Stage where Melt Analysis is performed	Stage3
Stage/ Cycle where Ct Analysis is performed	Stage2, Step2
User Name
Well	Well Position	Cycle	Target Name	Rn	Delta Rn
1	A1	1	kif2c	0.117967	0.000730593
1	A1	2	kif2c	0.117929	0.000816473
1	A1	3	kif2c	0.11767	0.000682025
1	A1	4	kif2c	0.118083	0.00121918
1	A1	5	kif2c	0.119017	0.00227794
1	A1	6	kif2c	0.117634	0.00101881
1	A1	7	kif2c	0.116042	-0.000448403
1	A1	8	kif2c	0.115602	-0.000764512
1	A1	9	kif2c	0.115688	-0.000553812
1	A1	10	kif2c	0.115858	-0.000260128
1	A1	11	kif2c	0.112647	-0.00334633
1	A1	12	kif2c	0.11231	-0.00355962
1	A1	13	kif2c	0.113475	-0.0022701
1	A1	14	kif2c	0.114826	-0.000794375
1	A1	15	kif2c	0.116088	0.000591259
1	A1	16	kif2c	0.117205	0.00183319
1	A1	17	kif2c	0.119622	0.00437487
1	A1	18	kif2c	0.124309	0.00918573
1	A1	19	kif2c	0.136633	0.0216337
1	A1	20	kif2c	0.16127	0.0463958
1	A1	21	kif2c	0.206886	0.0921352
1	A1	22	kif2c	0.29717	0.182544
1	A1	23	kif2c	0.460995	0.346493
1	A1	24	kif2c	0.754045	0.639668
1	A1	25	kif2c	1.23392	1.11967
1	A1	26	kif2c	1.88321	1.76908
1	A1	27	kif2c	2.54742	2.43341
1	A1	28	kif2c	3.00907	2.89519
1	A1	29	kif2c	3.28948	3.17572
1	A1	30	kif2c	3.486	3.37237
1	A1	31	kif2c	3.61959	3.50608
1	A1	32	kif2c	3.70871	3.59533
1	A1	33	kif2c	3.76776	3.6545
1	A1	34	kif2c	3.81271	3.69958
1	A1	35	kif2c	3.84629	3.73328
1	A1	36	kif2c	3.86876	3.75588
1	A1	37	kif2c	3.88207	3.76931
1	A1	38	kif2c	3.89306	3.78043
1	A1	39	kif2c	3.89813	3.78561
1	A1	40	kif2c	3.90507	3.79268
1	A1	41	kif2c	3.91015	3.79788
1	A1	42	kif2c	3.91236	3.80022
1	A1	43	kif2c	3.91131	3.7993
1	A1	44	kif2c	3.90902	3.79713
1	A1	45	kif2c	3.9063	3.79453
2	A2	1	kif2c	0.110099	-0.000244003
2	A2	2	kif2c	0.109743	-0.000410587
2	A2	3	kif2c	0.111602	0.00163839
2	A2	4	kif2c	0.112025	0.00225042
2	A2	5	kif2c	0.109863	0.000277774
2	A2	6	kif2c	0.109121	-0.000273961
2	A2	7	kif2c	0.10945	0.000244625
2	A2	8	kif2c	0.108827	-0.000188891
2	A2	9	kif2c	0.107046	-0.00178066
2	A2	10	kif2c	0.106688	-0.00194967
2	A2	11	kif2c	0.106939	-0.0015084
2	A2	12	kif2c	0.106931	-0.00132769
2	A2	13	kif2c	0.106984	-0.0010849
2	A2	14	kif2c	0.106261	-0.00161836
2	A2	15	kif2c	0.106614	-0.0010754
2	A2	16	kif2c	0.109169	0.00166844
2	A2	17	kif2c	0.112039	0.00472827
2	A2	18	kif2c	0.11451	0.00738897
2	A2	19	kif2c	0.12629	0.0193585
2	A2	20	kif2c	0.150142	0.0433996
2	A2	21	kif2c	0.190889	0.0843361
2	A2	22	kif2c	0.272164	0.165801
2	A2	23	kif2c	0.425535	0.319362
2	A2	24	kif2c	0.698868	0.592884
2	A2	25	kif2c	1.15001	1.04422
2	A2	26	kif2c	1.78045	1.67484
2	A2	27	kif2c	2.44952	2.3441
2	A2	28	kif2c	2.94199	2.83676
2	A2	29	kif2c	3.23129	3.12625
2	A2	30	kif2c	3.43082	3.32598
2	A2	31	kif2c	3.57279	3.46814
2	A2	32	kif2c	3.66258	3.55812
2	A2	33	kif2c	3.72743	3.62315
2	A2	34	kif2c	3.77127	3.66718
2	A2	35	kif2c	3.80138	3.69748
2	A2	36	kif2c	3.82224	3.71853
2	A2	37	kif2c	3.83517	3.73165
2	A2	38	kif2c	3.8447	3.74137
2	A2	39	kif2c	3.85341	3.75027
2	A2	40	kif2c	3.85777	3.75482
2	A2	41	kif2c	3.85769	3.75493
2	A2	42	kif2c	3.85872	3.75615
2	A2	43	kif2c	3.85955	3.75717
2	A2	44	kif2c	3.85669	3.75449
2	A2	45	kif2c	3.85083	3.74882
3	A3	1	kif2c	0.125976	0.000930269
3	A3	2	kif2c	0.126152	0.00149501
3	A3	3	kif2c	0.125678	0.00141074
3	A3	4	kif2c	0.125128	0.00125033
3	A3	5	kif2c	0.124348	0.00085959
3	A3	6	kif2c	0.123666	0.000567174
3	A3	7	kif2c	0.122447	-0.000262593
3	A3	8	kif2c	0.121826	-0.000493705
3	A3	9	kif2c	0.121387	-0.000543895
3	A3	10	kif2c	0.120331	-0.00121042
3	A3	11	kif2c	0.119292	-0.0018591
3	A3	12	kif2c	0.118271	-0.00249087
3	A3	13	kif2c	0.118361	-0.00201119
3	A3	14	kif2c	0.119217	-0.000766062
3	A3	15	kif2c	0.119679	8.48808e-05
3	A3	16	kif2c	0.120321	0.00111689
3	A3	17	kif2c	0.123163	0.00434823
3	A3	18	kif2c	0.128955	0.0105301
3	A3	19	kif2c	0.140677	0.0226411
3	A3	20	kif2c	0.163257	0.0456106
3	A3	21	kif2c	0.208303	0.0910458
3	A3	22	kif2c	0.294284	0.177417
3	A3	23	kif2c	0.451542	0.335064
3	A3	24	kif2c	0.736309	0.62022
3	A3	25	kif2c	1.20489	1.08919
3	A3	26	kif2c	1.85679	1.74148
3	A3	27	kif2c	2.55025	2.43533
3	A3	28	kif2c	3.05885	2.94432
3	A3	29	kif2c	3.35145	3.23731
3	A3	30	kif2c	3.55274	3.43898
3	A3	31	kif2c	3.6912	3.57784
3	A3	32	kif2c	3.77994	3.66697
3	A3	33	kif2c	3.83665	3.72407
3	A3	34	kif2c	3.87807	3.76588
3	A3	35	kif2c	3.90568	3.79388
3	A3	36	kif2c	3.92787	3.81645
3	A3	37	kif2c	3.9441	3.83308
3	A3	38	kif2c	3.95554	3.8449
3	A3	39	kif2c	3.96162	3.85137
3	A3	40	kif2c	3.96666	3.85681
3	A3	41	kif2c	3.96896	3.85949
3	A3	42	kif2c	3.96962	3.86054
3	A3	43	kif2c	3.96572	3.85703
3	A3	44	kif2c	3.96096	3.85266
3	A3	45	kif2c	3.95368	3.84577
4	A4	1	GAPDH	0.108638	0.0012391
4	A4	2	GAPDH	0.108421	0.000797928
4	A4	3	GAPDH	0.108553	0.000705726
4	A4	4	GAPDH	0.108822	0.000750264
4	A4	5	GAPDH	0.107824	-0.000471954
4	A4	6	GAPDH	0.106651	-0.00186844
4	A4	7	GAPDH	0.107367	-0.00137694
4	A4	8	GAPDH	0.11123	0.00226135
4	A4	9	GAPDH	0.116653	0.00746069
4	A4	10	GAPDH	0.129627	0.0202102
4	A4	11	GAPDH	0.15199	0.0423491
4	A4	12	GAPDH	0.198217	0.0883521
4	A4	13	GAPDH	0.287894	0.177805
4	A4	14	GAPDH	0.455835	0.345521
4	A4	15	GAPDH	0.753395	0.642857
4	A4	16	GAPDH	1.23547	1.12471
4	A4	17	GAPDH	1.88501	1.77403
4	A4	18	GAPDH	2.52576	2.41455
4	A4	19	GAPDH	2.95979	2.84836
4	A4	20	GAPDH	3.26053	3.14887
4	A4	21	GAPDH	3.48126	3.36938
4	A4	22	GAPDH	3.63233	3.52022
4	A4	23	GAPDH	3.73904	3.62671
4	A4	24	GAPDH	3.81328	3.70072
4	A4	25	GAPDH	3.86429	3.75151
4	A4	26	GAPDH	3.90339	3.79039
4	A4	27	GAPDH	3.92916	3.81594
4	A4	28	GAPDH	3.95211	3.83866
4	A4	29	GAPDH	3.97104	3.85736
4	A4	30	GAPDH	3.98367	3.86977
4	A4	31	GAPDH	3.99689	3.88276
4	A4	32	GAPDH	4.00378	3.88943
4	A4	33	GAPDH	4.00539	3.89082
4	A4	34	GAPDH	4.00852	3.89372
4	A4	35	GAPDH	4.01364	3.89862
4	A4	36	GAPDH	4.01597	3.90073
4	A4	37	GAPDH	4.01827	3.9028
4	A4	38	GAPDH	4.01777	3.90208
4	A4	39	GAPDH	4.01329	3.89737
4	A4	40	GAPDH	4.01042	3.89428
4	A4	41	GAPDH	4.00991	3.89354
4	A4	42	GAPDH	4.01495	3.89836
4	A4	43	GAPDH	4.01402	3.8972
4	A4	44	GAPDH	4.00868	3.89164
4	A4	45	GAPDH	4.0014	3.88414
5	A5	1	GAPDH	0.108821	-0.000964992
5	A5	2	GAPDH	0.109126	-0.0010811
5	A5	3	GAPDH	0.11094	0.000312
5	A5	4	GAPDH	0.112138	0.00108847
5	A5	5	GAPDH	0.110587	-0.000883029
5	A5	6	GAPDH	0.110473	-0.00141861
5	A5	7	GAPDH	0.111885	-0.000427575
5	A5	8	GAPDH	0.114062	0.00132874
5	A5	9	GAPDH	0.12034	0.00718593
5	A5	10	GAPDH	0.131472	0.0178967
5	A5	11	GAPDH	0.153434	0.0394383
5	A5	12	GAPDH	0.197372	0.0829553
5	A5	13	GAPDH	0.283824	0.168986
5	A5	14	GAPDH	0.442819	0.32756
5	A5	15	GAPDH	0.727328	0.611648
5	A5	16	GAPDH	1.19772	1.08162
5	A5	17	GAPDH	1.85025	1.73373
5	A5	18	GAPDH	2.53869	2.42175
5	A5	19	GAPDH	3.0385	2.92113
5	A5	20	GAPDH	3.34954	3.23176
5	A5	21	GAPDH	3.56826	3.45005
5	A5	22	GAPDH	3.71882	3.6002
5	A5	23	GAPDH	3.82113	3.70209
5	A5	24	GAPDH	3.89114	3.77167
5	A5	25	GAPDH	3.94273	3.82284
5	A5	26	GAPDH	3.97473	3.85442
5	A5	27	GAPDH	4.00575	3.88502
5	A5	28	GAPDH	4.02764	3.90649
5	A5	29	GAPDH	4.03807	3.9165
5	A5	30	GAPDH	4.05279	3.9308
5	A5	31	GAPDH	4.06408	3.94166
5	A5	32	GAPDH	4.06585	3.94302
5	A5	33	GAPDH	4.06963	3.94637
5	A5	34	GAPDH	4.08096	3.95728
5	A5	35	GAPDH	4.08426	3.96016
5	A5	36	GAPDH	4.08405	3.95953
5	A5	37	GAPDH	4.08229	3.95735
5	A5	38	GAPDH	4.08154	3.95618
5	A5	39	GAPDH	4.08052	3.95474
5	A5	40	GAPDH	4.08447	3.95827
5	A5	41	GAPDH	4.08295	3.95633
5	A5	42	GAPDH	4.08168	3.95463
5	A5	43	GAPDH	4.07761	3.95014
5	A5	44	GAPDH	4.0716	3.94372
5	A5	45	GAPDH	4.06338	3.93507
6	A6	1	GAPDH	0.104666	0.000262468
6	A6	2	GAPDH	0.105214	0.000383243
6	A6	3	GAPDH	0.105671	0.000412496
6	A6	4	GAPDH	0.1059	0.000214103
6	A6	5	GAPDH	0.106063	-5.00934e-05
6	A6	6	GAPDH	0.105619	-0.000922056
6	A6	7	GAPDH	0.106044	-0.000924498
6	A6	8	GAPDH	0.108666	0.00127005
6	A6	9	GAPDH	0.115507	0.00768378
6	A6	10	GAPDH	0.126491	0.01824
6	A6	11	GAPDH	0.147852	0.0391734
6	A6	12	GAPDH	0.190627	0.0815212
6	A6	13	GAPDH	0.275321	0.165788
6	A6	14	GAPDH	0.436882	0.326921
6	A6	15	GAPDH	0.724223	0.613834
6	A6	16	GAPDH	1.19728	1.08646
6	A6	17	GAPDH	1.85138	1.74013
6	A6	18	GAPDH	2.5391	2.42742
6	A6	19	GAPDH	3.02914	2.91704
6	A6	20	GAPDH	3.33683	3.22431
6	A6	21	GAPDH	3.55334	3.44039
6	A6	22	GAPDH	3.7051	3.59172
6	A6	23	GAPDH	3.80603	3.69222
6	A6	24	GAPDH	3.87591	3.76167
6	A6	25	GAPDH	3.926	3.81134
6	A6	26	GAPDH	3.9585	3.8434
6	A6	27	GAPDH	3.98371	3.86819
6	A6	28	GAPDH	4.0099	3.89395
6	A6	29	GAPDH	4.02834	3.91197
6	A6	30	GAPDH	4.04088	3.92408
6	A6	31	GAPDH	4.04679	3.92956
6	A6	32	GAPDH	4.05472	3.93706
6	A6	33	GAPDH	4.06135	3.94326
6	A6	34	GAPDH	4.06418	3.94566
6	A6	35	GAPDH	4.06921	3.95027
6	A6	36	GAPDH	4.06862	3.94926
6	A6	37	GAPDH	4.06662	3.94682
6	A6	38	GAPDH	4.07067	3.95044
6	A6	39	GAPDH	4.07131	3.95066
6	A6	40	GAPDH	4.07259	3.95151
6	A6	41	GAPDH	4.06788	3.94638
6	A6	42	GAPDH	4.0607	3.93877
6	A6	43	GAPDH	4.06376	3.9414
6	A6	44	GAPDH	4.05833	3.93555
6	A6	45	GAPDH	4.05403	3.93082
7	A7	1
7	A7	2
7	A7	3
7	A7	4
7	A7	5
7	A7	6
7	A7	7
7	A7	8
7	A7	9
7	A7	10
7	A7	11
7	A7	12
7	A7	13
7	A7	14
7	A7	15
7	A7	16
7	A7	17
7	A7	18
7	A7	19
7	A7	20
7	A7	21
7	A7	22
7	A7	23
7	A7	24
7	A7	25
7	A7	26
7	A7	27
7	A7	28
7	A7	29
7	A7	30
7	A7	31
7	A7	32
7	A7	33
7	A7	34
7	A7	35
7	A7	36
7	A7	37
7	A7	38
7	A7	39
7	A7	40
7	A7	41
7	A7	42
7	A7	43
7	A7	44
7	A7	45
8	A8	1
8	A8	2
8	A8	3
8	A8	4
8	A8	5
8	A8	6
8	A8	7
8	A8	8
8	A8	9
8	A8	10
8	A8	11
8	A8	12
8	A8	13
8	A8	14
8	A8	15
8	A8	16
8	A8	17
8	A8	18
8	A8	19
8	A8	20
8	A8	21
8	A8	22
8	A8	23
8	A8	24
8	A8	25
8	A8	26
8	A8	27
8	A8	28
8	A8	29
8	A8	30
8	A8	31
8	A8	32
8	A8	33
8	A8	34
8	A8	35
8	A8	36
8	A8	37
8	A8	38
8	A8	39
8	A8	40
8	A8	41
8	A8	42
8	A8	43
8	A8	44
8	A8	45
9	A9	1
9	A9	2
9	A9	3
9	A9	4
9	A9	5
9	A9	6
9	A9	7
9	A9	8
9	A9	9
9	A9	10
9	A9	11
9	A9	12
9	A9	13
9	A9	14
9	A9	15
9	A9	16
9	A9	17
9	A9	18
9	A9	19
9	A9	20
9	A9	21
9	A9	22
9	A9	23
9	A9	24
9	A9	25
9	A9	26
9	A9	27
9	A9	28
9	A9	29
9	A9	30
9	A9	31
9	A9	32
9	A9	33
9	A9	34
9	A9	35
9	A9	36
9	A9	37
9	A9	38
9	A9	39
9	A9	40
9	A9	41
9	A9	42
9	A9	43
9	A9	44
9	A9	45
10	A10	1
10	A10	2
10	A10	3
10	A10	4
10	A10	5
10	A10	6
10	A10	7
10	A10	8
10	A10	9
10	A10	10
10	A10	11
10	A10	12
10	A10	13
10	A10	14
10	A10	15
10	A10	16
10	A10	17
10	A10	18
10	A10	19
10	A10	20
10	A10	21
10	A10	22
10	A10	23
10	A10	24
10	A10	25
10	A10	26
10	A10	27
10	A10	28
10	A10	29
10	A10	30
10	A10	31
10	A10	32
10	A10	33
10	A10	34
10	A10	35
10	A10	36
10	A10	37
10	A10	38
10	A10	39
10	A10	40
10	A10	41
10	A10	42
10	A10	43
10	A10	44
10	A10	45
11	A11	1
11	A11	2
11	A11	3
11	A11	4
11	A11	5
11	A11	6
11	A11	7
11	A11	8
11	A11	9
11	A11	10
11	A11	11
11	A11	12
11	A11	13
11	A11	14
11	A11	15
11	A11	16
11	A11	17
11	A11	18
11	A11	19
11	A11	20
11	A11	21
11	A11	22
11	A11	23
11	A11	24
11	A11	25
11	A11	26
11	A11	27
11	A11	28
11	A11	29
11	A11	30
11	A11	31
11	A11	32
11	A11	33
11	A11	34
11	A11	35
11	A11	36
11	A11	37
11	A11	38
11	A11	39
11	A11	40
11	A11	41
11	A11	42
11	A11	43
11	A11	44
11	A11	45
12	A12	1
12	A12	2
12	A12	3
12	A12	4
12	A12	5
12	A12	6
12	A12	7
12	A12	8
12	A12	9
12	A12	10
12	A12	11
12	A12	12
12	A12	13
12	A12	14
12	A12	15
12	A12	16
12	A12	17
12	A12	18
12	A12	19
12	A12	20
12	A12	21
12	A12	22
12	A12	23
12	A12	24
12	A12	25
12	A12	26
12	A12	27
12	A12	28
12	A12	29
12	A12	30
12	A12	31
12	A12	32
12	A12	33
12	A12	34
12	A12	35
12	A12	36
12	A12	37
12	A12	38
12	A12	39
12	A12	40
12	A12	41
12	A12	42
12	A12	43
12	A12	44
12	A12	45
13	B1	1	kif2c	0.141468	-0.00248115
13	B1	2	kif2c	0.142471	-0.00110855
13	B1	3	kif2c	0.142511	-0.000699173
13	B1	4	kif2c	0.142996	0.000155537
13	B1	5	kif2c	0.14318	0.000709259
13	B1	6	kif2c	0.144207	0.00210573
13	B1	7	kif2c	0.143555	0.00182387
13	B1	8	kif2c	0.140604	-0.000757522
13	B1	9	kif2c	0.13982	-0.00117229
13	B1	10	kif2c	0.139573	-0.00104973
13	B1	11	kif2c	0.139321	-0.000931851
13	B1	12	kif2c	0.138875	-0.00100803
13	B1	13	kif2c	0.138619	-0.000894802
13	B1	14	kif2c	0.137926	-0.0012174
13	B1	15	kif2c	0.138066	-0.000707997
13	B1	16	kif2c	0.139081	0.000676346
13	B1	17	kif2c	0.141003	0.00296805
13	B1	18	kif2c	0.146132	0.00846687
13	B1	19	kif2c	0.156234	0.0189384
13	B1	20	kif2c	0.175816	0.0388904
13	B1	21	kif2c	0.216304	0.0797484
13	B1	22	kif2c	0.294288	0.158102
13	B1	23	kif2c	0.440401	0.304585
13	B1	24	kif2c	0.704089	0.568642
13	B1	25	kif2c	1.14821	1.01314
13	B1	26	kif2c	1.77856	1.64386
13	B1	27	kif2c	2.4785	2.34417
13	B1	28	kif2c	3.00789	2.87392
13	B1	29	kif2c	3.32671	3.19311
13	B1	30	kif2c	3.55394	3.42071
13	B1	31	kif2c	3.71307	3.58021
13	B1	32	kif2c	3.81963	3.68714
13	B1	33	kif2c	3.89102	3.7589
13	B1	34	kif2c	3.9445	3.81276
13	B1	35	kif2c	3.97798	3.8466
13	B1	36	kif2c	4.00062	3.86961
13	B1	37	kif2c	4.0197	3.88906
13	B1	38	kif2c	4.03512	3.90485
13	B1	39	kif2c	4.04698	3.91708
13	B1	40	kif2c	4.05412	3.92459
13	B1	41	kif2c	4.05471	3.92555
13	B1	42	kif2c	4.05777	3.92898
13	B1	43	kif2c	4.05805	3.92963
13	B1	44	kif2c	4.05524	3.92719
13	B1	45	kif2c	4.04908	3.9214
14	B2	1	kif2c	0.150739	0.00315583
14	B2	2	kif2c	0.150086	0.00293315
14	B2	3	kif2c	0.148108	0.00138552
14	B2	4	kif2c	0.147227	0.000934282
14	B2	5	kif2c	0.146406	0.000544365
14	B2	6	kif2c	0.145867	0.000435768
14	B2	7	kif2c	0.144863	-0.000138192
14	B2	8	kif2c	0.143445	-0.00112597
14	B2	9	kif2c	0.143048	-0.00109204
14	B2	10	kif2c	0.143024	-0.000686265
14	B2	11	kif2c	0.142414	-0.00086533
14	B2	12	kif2c	0.14191	-0.000939222
14	B2	13	kif2c	0.140882	-0.00153646
14	B2	14	kif2c	0.140903	-0.00108567
14	B2	15	kif2c	0.141673	0.000114624
14	B2	16	kif2c	0.142377	0.00124881
14	B2	17	kif2c	0.143503	0.00280578
14	B2	18	kif2c	0.148266	0.00799934
14	B2	19	kif2c	0.158595	0.0187584
14	B2	20	kif2c	0.178833	0.0394272
14	B2	21	kif2c	0.215361	0.0763852
14	B2	22	kif2c	0.290406	0.151861
14	B2	23	kif2c	0.43166	0.293545
14	B2	24	kif2c	0.687271	0.549586
14	B2	25	kif2c	1.11467	0.977411
14	B2	26	kif2c	1.73821	1.60139
14	B2	27	kif2c	2.44309	2.3067
14	B2	28	kif2c	2.99804	2.86208
14	B2	29	kif2c	3.32244	3.18691
14	B2	30	kif2c	3.54519	3.41009
14	B2	31	kif2c	3.69825	3.56358
14	B2	32	kif2c	3.8072	3.67296
14	B2	33	kif2c	3.87963	3.74582
14	B2	34	kif2c	3.9277	3.79432
14	B2	35	kif2c	3.95708	3.82413
14	B2	36	kif2c	3.97964	3.84712
14	B2	37	kif2c	3.99789	3.8658
14	B2	38	kif2c	4.00847	3.87681
14	B2	39	kif2c	4.0181	3.88688
14	B2	40	kif2c	4.02333	3.89253
14	B2	41	kif2c	4.02649	3.89613
14	B2	42	kif2c	4.02586	3.89592
14	B2	43	kif2c	4.02813	3.89862
14	B2	44	kif2c	4.02501	3.89593
14	B2	45	kif2c	4.01644	3.88779
15	B3	1	kif2c	0.146254	0.00205115
15	B3	2	kif2c	0.145859	0.00211377
15	B3	3	kif2c	0.144038	0.000750872
15	B3	4	kif2c	0.143673	0.000843908
15	B3	5	kif2c	0.144097	0.00172605
15	B3	6	kif2c	0.142889	0.000975664
15	B3	7	kif2c	0.140388	-0.00106798
15	B3	8	kif2c	0.139787	-0.00121087
15	B3	9	kif2c	0.140314	-0.00022581
15	B3	10	kif2c	0.139978	-0.000103613
15	B3	11	kif2c	0.137743	-0.00188125
15	B3	12	kif2c	0.137253	-0.00191367
15	B3	13	kif2c	0.137415	-0.00129319
15	B3	14	kif2c	0.137137	-0.00111314
15	B3	15	kif2c	0.137379	-0.000413222
15	B3	16	kif2c	0.138711	0.00137603
15	B3	17	kif2c	0.140427	0.00355023
15	B3	18	kif2c	0.145417	0.00899791
15	B3	19	kif2c	0.155718	0.0197565
15	B3	20	kif2c	0.17495	0.0394469
15	B3	21	kif2c	0.211364	0.0763189
15	B3	22	kif2c	0.285533	0.150946
15	B3	23	kif2c	0.423217	0.289088
15	B3	24	kif2c	0.673822	0.54015
15	B3	25	kif2c	1.09998	0.966767
15	B3	26	kif2c	1.72177	1.58901
15	B3	27	kif2c	2.44354	2.31125
15	B3	28	kif2c	3.03621	2.90437
15	B3	29	kif2c	3.38258	3.2512
15	B3	30	kif2c	3.61131	3.48038
15	B3	31	kif2c	3.77257	3.6421
15	B3	32	kif2c	3.88045	3.75044
15	B3	33	kif2c	3.95467	3.82512
15	B3	34	kif2c	4.00419	3.8751
15	B3	35	kif2c	4.03905	3.91041
15	B3	36	kif2c	4.0639	3.93572
15	B3	37	kif2c	4.07844	3.95072
15	B3	38	kif2c	4.09123	3.96397
15	B3	39	kif2c	4.10099	3.97419
15	B3	40	kif2c	4.10803	3.98168
15	B3	41	kif2c	4.10947	3.98358
15	B3	42	kif2c	4.10747	3.98204
15	B3	43	kif2c	4.11115	3.98617
15	B3	44	kif2c	4.10817	3.98366
15	B3	45	kif2c	4.10092	3.97686
16	B4	1	GAPDH	0.124753	0.00126022
16	B4	2	GAPDH	0.125428	0.00156531
16	B4	3	GAPDH	0.125164	0.000931829
16	B4	4	GAPDH	0.124699	9.79543e-05
16	B4	5	GAPDH	0.124393	-0.000577633
16	B4	6	GAPDH	0.124128	-0.00121137
16	B4	7	GAPDH	0.124813	-0.000895323
16	B4	8	GAPDH	0.127732	0.00165454
16	B4	9	GAPDH	0.131476	0.00502867
16	B4	10	GAPDH	0.141544	0.0147278
16	B4	11	GAPDH	0.16244	0.0352541
16	B4	12	GAPDH	0.202318	0.0747634
16	B4	13	GAPDH	0.283842	0.155918
16	B4	14	GAPDH	0.434421	0.306128
16	B4	15	GAPDH	0.704261	0.575599
16	B4	16	GAPDH	1.15619	1.02716
16	B4	17	GAPDH	1.80205	1.67265
16	B4	18	GAPDH	2.50834	2.37857
16	B4	19	GAPDH	3.04603	2.91589
16	B4	20	GAPDH	3.38591	3.2554
16	B4	21	GAPDH	3.62445	3.49357
16	B4	22	GAPDH	3.78819	3.65695
16	B4	23	GAPDH	3.89671	3.76509
16	B4	24	GAPDH	3.97065	3.83867
16	B4	25	GAPDH	4.02355	3.89119
16	B4	26	GAPDH	4.06191	3.92919
16	B4	27	GAPDH	4.09236	3.95927
16	B4	28	GAPDH	4.11402	3.98055
16	B4	29	GAPDH	4.1344	4.00057
16	B4	30	GAPDH	4.14887	4.01466
16	B4	31	GAPDH	4.15947	4.02489
16	B4	32	GAPDH	4.16689	4.03195
16	B4	33	GAPDH	4.17354	4.03823
16	B4	34	GAPDH	4.1778	4.04212
16	B4	35	GAPDH	4.1787	4.04265
16	B4	36	GAPDH	4.17803	4.04162
16	B4	37	GAPDH	4.1779	4.04112
16	B4	38	GAPDH	4.17891	4.04176
16	B4	39	GAPDH	4.1801	4.04258
16	B4	40	GAPDH	4.18092	4.04303
16	B4	41	GAPDH	4.17806	4.0398
16	B4	42	GAPDH	4.17662	4.03799
16	B4	43	GAPDH	4.17764	4.03864
16	B4	44	GAPDH	4.17425	4.03488
16	B4	45	GAPDH	4.16481	4.02507
17	B5	1	GAPDH	0.131571	0.0036687
17	B5	2	GAPDH	0.131485	0.00292433
17	B5	3	GAPDH	0.130374	0.00115543
17	B5	4	GAPDH	0.129347	-0.000529323
17	B5	5	GAPDH	0.129606	-0.000928955
17	B5	6	GAPDH	0.130894	-0.000297992
17	B5	7	GAPDH	0.131573	-0.000277009
17	B5	8	GAPDH	0.133386	0.000877849
17	B5	9	GAPDH	0.137057	0.00389006
17	B5	10	GAPDH	0.146267	0.012443
17	B5	11	GAPDH	0.166352	0.0318694
17	B5	12	GAPDH	0.205672	0.0705311
17	B5	13	GAPDH	0.282689	0.14689
17	B5	14	GAPDH	0.423947	0.28749
17	B5	15	GAPDH	0.681599	0.544484
17	B5	16	GAPDH	1.11523	0.97746
17	B5	17	GAPDH	1.74466	1.60623
17	B5	18	GAPDH	2.44794	2.30885
17	B5	19	GAPDH	2.98311	2.84336
17	B5	20	GAPDH	3.31913	3.17873
17	B5	21	GAPDH	3.55688	3.41581
17	B5	22	GAPDH	3.7242	3.58247
17	B5	23	GAPDH	3.83879	3.69641
17	B5	24	GAPDH	3.91583	3.77279
17	B5	25	GAPDH	3.97182	3.82812
17	B5	26	GAPDH	4.01136	3.86701
17	B5	27	GAPDH	4.0435	3.89849
17	B5	28	GAPDH	4.07033	3.92466
17	B5	29	GAPDH	4.08591	3.93958
17	B5	30	GAPDH	4.09911	3.95212
17	B5	31	GAPDH	4.11688	3.96923
17	B5	32	GAPDH	4.12298	3.97468
17	B5	33	GAPDH	4.12368	3.97472
17	B5	34	GAPDH	4.13588	3.98626
17	B5	35	GAPDH	4.13751	3.98723
17	B5	36	GAPDH	4.13356	3.98263
17	B5	37	GAPDH	4.12896	3.97737
17	B5	38	GAPDH	4.12729	3.97504
17	B5	39	GAPDH	4.13055	3.97764
17	B5	40	GAPDH	4.1307	3.97714
17	B5	41	GAPDH	4.13131	3.97709
17	B5	42	GAPDH	4.1315	3.97662
17	B5	43	GAPDH	4.12767	3.97213
17	B5	44	GAPDH	4.12486	3.96866
17	B5	45	GAPDH	4.11841	3.96156
18	B6	1	GAPDH	0.0926559	0.0028279
18	B6	2	GAPDH	0.0928662	0.00183792
18	B6	3	GAPDH	0.0934455	0.00121702
18	B6	4	GAPDH	0.0937253	0.000296675
18	B6	5	GAPDH	0.0939838	-0.000645076
18	B6	6	GAPDH	0.0946506	-0.00117839
18	B6	7	GAPDH	0.0959165	-0.00111274
18	B6	8	GAPDH	0.0977849	-0.000444558
18	B6	9	GAPDH	0.101297	0.00186706
18	B6	10	GAPDH	0.109847	0.00921739
18	B6	11	GAPDH	0.127964	0.0261336
18	B6	12	GAPDH	0.161456	0.0584256
18	B6	13	GAPDH	0.230475	0.126245
18	B6	14	GAPDH	0.358689	0.253259
18	B6	15	GAPDH	0.59205	0.485419
18	B6	16	GAPDH	0.995603	0.887772
18	B6	17	GAPDH	1.60629	1.49725
18	B6	18	GAPDH	2.34162	2.23138
18	B6	19	GAPDH	2.96769	2.85626
18	B6	20	GAPDH	3.35039	3.23776
18	B6	21	GAPDH	3.61038	3.49654
18	B6	22	GAPDH	3.79641	3.68138
18	B6	23	GAPDH	3.9133	3.79707
18	B6	24	GAPDH	3.99653	3.8791
18	B6	25	GAPDH	4.06053	3.9419
18	B6	26	GAPDH	4.0993	3.97947
18	B6	27	GAPDH	4.13737	4.01633
18	B6	28	GAPDH	4.16397	4.04174
18	B6	29	GAPDH	4.18526	4.06183
18	B6	30	GAPDH	4.19632	4.07168
18	B6	31	GAPDH	4.20601	4.08017
18	B6	32	GAPDH	4.2156	4.08857
18	B6	33	GAPDH	4.22728	4.09905
18	B6	34	GAPDH	4.23692	4.10749
18	B6	35	GAPDH	4.23521	4.10458
18	B6	36	GAPDH	4.237	4.10516
18	B6	37	GAPDH	4.23875	4.10571
18	B6	38	GAPDH	4.2415	4.10727
18	B6	39	GAPDH	4.23798	4.10254
18	B6	40	GAPDH	4.23967	4.10303
18	B6	41	GAPDH	4.23621	4.09837
18	B6	42	GAPDH	4.23359	4.09456
18	B6	43	GAPDH	4.23341	4.09317
18	B6	44	GAPDH	4.23203	4.09059
18	B6	45	GAPDH	4.23669	4.09405
19	B7	1
19	B7	2
19	B7	3
19	B7	4
19	B7	5
19	B7	6
19	B7	7
19	B7	8
19	B7	9
19	B7	10
19	B7	11
19	B7	12
19	B7	13
19	B7	14
19	B7	15
19	B7	16
19	B7	17
19	B7	18
19	B7	19
19	B7	20
19	B7	21
19	B7	22
19	B7	23
19	B7	24
19	B7	25
19	B7	26
19	B7	27
19	B7	28
19	B7	29
19	B7	30
19	B7	31
19	B7	32
19	B7	33
19	B7	34
19	B7	35
19	B7	36
19	B7	37
19	B7	38
19	B7	39
19	B7	40
19	B7	41
19	B7	42
19	B7	43
19	B7	44
19	B7	45
20	B8	1
20	B8	2
20	B8	3
20	B8	4
20	B8	5
20	B8	6
20	B8	7
20	B8	8
20	B8	9
20	B8	10
20	B8	11
20	B8	12
20	B8	13
20	B8	14
20	B8	15
20	B8	16
20	B8	17
20	B8	18
20	B8	19
20	B8	20
20	B8	21
20	B8	22
20	B8	23
20	B8	24
20	B8	25
20	B8	26
20	B8	27
20	B8	28
20	B8	29
20	B8	30
20	B8	31
20	B8	32
20	B8	33
20	B8	34
20	B8	35
20	B8	36
20	B8	37
20	B8	38
20	B8	39
20	B8	40
20	B8	41
20	B8	42
20	B8	43
20	B8	44
20	B8	45
21	B9	1
21	B9	2
21	B9	3
21	B9	4
21	B9	5
21	B9	6
21	B9	7
21	B9	8
21	B9	9
21	B9	10
21	B9	11
21	B9	12
21	B9	13
21	B9	14
21	B9	15
21	B9	16
21	B9	17
21	B9	18
21	B9	19
21	B9	20
21	B9	21
21	B9	22
21	B9	23
21	B9	24
21	B9	25
21	B9	26
21	B9	27
21	B9	28
21	B9	29
21	B9	30
21	B9	31
21	B9	32
21	B9	33
21	B9	34
21	B9	35
21	B9	36
21	B9	37
21	B9	38
21	B9	39
21	B9	40
21	B9	41
21	B9	42
21	B9	43
21	B9	44
21	B9	45
22	B10	1
22	B10	2
22	B10	3
22	B10	4
22	B10	5
22	B10	6
22	B10	7
22	B10	8
22	B10	9
22	B10	10
22	B10	11
22	B10	12
22	B10	13
22	B10	14
22	B10	15
22	B10	16
22	B10	17
22	B10	18
22	B10	19
22	B10	20
22	B10	21
22	B10	22
22	B10	23
22	B10	24
22	B10	25
22	B10	26
22	B10	27
22	B10	28
22	B10	29
22	B10	30
22	B10	31
22	B10	32
22	B10	33
22	B10	34
22	B10	35
22	B10	36
22	B10	37
22	B10	38
22	B10	39
22	B10	40
22	B10	41
22	B10	42
22	B10	43
22	B10	44
22	B10	45
23	B11	1
23	B11	2
23	B11	3
23	B11	4
23	B11	5
23	B11	6
23	B11	7
23	B11	8
23	B11	9
23	B11	10
23	B11	11
23	B11	12
23	B11	13
23	B11	14
23	B11	15
23	B11	16
23	B11	17
23	B11	18
23	B11	19
23	B11	20
23	B11	21
23	B11	22
23	B11	23
23	B11	24
23	B11	25
23	B11	26
23	B11	27
23	B11	28
23	B11	29
23	B11	30
23	B11	31
23	B11	32
23	B11	33
23	B11	34
23	B11	35
23	B11	36
23	B11	37
23	B11	38
23	B11	39
23	B11	40
23	B11	41
23	B11	42
23	B11	43
23	B11	44
23	B11	45
24	B12	1
24	B12	2
24	B12	3
24	B12	4
24	B12	5
24	B12	6
24	B12	7
24	B12	8
24	B12	9
24	B12	10
24	B12	11
24	B12	12
24	B12	13
24	B12	14
24	B12	15
24	B12	16
24	B12	17
24	B12	18
24	B12	19
24	B12	20
24	B12	21
24	B12	22
24	B12	23
24	B12	24
24	B12	25
24	B12	26
24	B12	27
24	B12	28
24	B12	29
24	B12	30
24	B12	31
24	B12	32
24	B12	33
24	B12	34
24	B12	35
24	B12	36
24	B12	37
24	B12	38
24	B12	39
24	B12	40
24	B12	41
24	B12	42
24	B12	43
24	B12	44
24	B12	45
25	C1	1	kif2c	0.16881	0.000657207
25	C1	2	kif2c	0.168408	0.000515289
25	C1	3	kif2c	0.168082	0.000448846
25	C1	4	kif2c	0.168069	0.000695178
25	C1	5	kif2c	0.167396	0.000282327
25	C1	6	kif2c	0.166843	-1.07327e-05
25	C1	7	kif2c	0.166082	-0.000512498
25	C1	8	kif2c	0.166056	-0.000278296
25	C1	9	kif2c	0.166536	0.000461205
25	C1	10	kif2c	0.165853	3.7998e-05
25	C1	11	kif2c	0.165426	-0.000130101
25	C1	12	kif2c	0.164688	-0.000608263
25	C1	13	kif2c	0.16359	-0.00144607
25	C1	14	kif2c	0.163235	-0.00154124
25	C1	15	kif2c	0.163706	-0.000811125
25	C1	16	kif2c	0.165192	0.000935143
25	C1	17	kif2c	0.166475	0.00247762
25	C1	18	kif2c	0.171301	0.0075633
25	C1	19	kif2c	0.180811	0.0173333
25	C1	20	kif2c	0.197701	0.0344825
25	C1	21	kif2c	0.230792	0.0678338
25	C1	22	kif2c	0.293956	0.131257
25	C1	23	kif2c	0.417548	0.255108
25	C1	24	kif2c	0.643943	0.481764
25	C1	25	kif2c	1.03199	0.870071
25	C1	26	kif2c	1.61284	1.45118
25	C1	27	kif2c	2.30653	2.14513
25	C1	28	kif2c	2.89522	2.73408
25	C1	29	kif2c	3.24655	3.08567
25	C1	30	kif2c	3.48812	3.3275
25	C1	31	kif2c	3.66408	3.50372
25	C1	32	kif2c	3.77912	3.61901
25	C1	33	kif2c	3.85819	3.69835
25	C1	34	kif2c	3.91229	3.75271
25	C1	35	kif2c	3.94953	3.79021
25	C1	36	kif2c	3.97295	3.81388
25	C1	37	kif2c	3.98687	3.82807
25	C1	38	kif2c	4.00037	3.84183
25	C1	39	kif2c	4.01131	3.85302
25	C1	40	kif2c	4.01936	3.86134
25	C1	41	kif2c	4.02275	3.86498
25	C1	42	kif2c	4.0246	3.86709
25	C1	43	kif2c	4.02605	3.86881
25	C1	44	kif2c	4.02184	3.86485
25	C1	45	kif2c	4.01665	3.85993
26	C2	1	kif2c	0.137828	0.00291505
26	C2	2	kif2c	0.137434	0.00293318
26	C2	3	kif2c	0.136296	0.00220804
26	C2	4	kif2c	0.13491	0.00123528
26	C2	5	kif2c	0.132408	-0.000854686
26	C2	6	kif2c	0.131766	-0.00108348
26	C2	7	kif2c	0.132292	-0.00014436
26	C2	8	kif2c	0.131949	-7.52247e-05
26	C2	9	kif2c	0.130842	-0.000769476
26	C2	10	kif2c	0.130739	-0.00045924
26	C2	11	kif2c	0.131187	0.000401505
26	C2	12	kif2c	0.13042	4.69105e-05
26	C2	13	kif2c	0.127584	-0.00237608
26	C2	14	kif2c	0.127332	-0.00221481
26	C2	15	kif2c	0.12857	-0.000564845
26	C2	16	kif2c	0.130051	0.00132938
26	C2	17	kif2c	0.13163	0.0033211
26	C2	18	kif2c	0.135597	0.0077006
26	C2	19	kif2c	0.144368	0.0168844
26	C2	20	kif2c	0.15975	0.0326792
26	C2	21	kif2c	0.188617	0.0619594
26	C2	22	kif2c	0.246117	0.119872
26	C2	23	kif2c	0.355141	0.229309
26	C2	24	kif2c	0.556357	0.430938
26	C2	25	kif2c	0.90729	0.782283
26	C2	26	kif2c	1.45598	1.33139
26	C2	27	kif2c	2.14571	2.02153
26	C2	28	kif2c	2.77681	2.65305
26	C2	29	kif2c	3.16476	3.04141
26	C2	30	kif2c	3.4248	3.30186
26	C2	31	kif2c	3.61542	3.49289
26	C2	32	kif2c	3.74454	3.62242
26	C2	33	kif2c	3.83108	3.70938
26	C2	34	kif2c	3.88972	3.76843
26	C2	35	kif2c	3.92851	3.80763
26	C2	36	kif2c	3.95298	3.83252
26	C2	37	kif2c	3.97585	3.8558
26	C2	38	kif2c	3.99613	3.87649
26	C2	39	kif2c	4.00856	3.88934
26	C2	40	kif2c	4.01979	3.90097
26	C2	41	kif2c	4.02215	3.90375
26	C2	42	kif2c	4.02067	3.90268
26	C2	43	kif2c	4.01907	3.90149
26	C2	44	kif2c	4.019	3.90184
26	C2	45	kif2c	4.01115	3.8944
27	C3	1	kif2c	0.16677	0.00323538
27	C3	2	kif2c	0.165994	0.00326096
27	C3	3	kif2c	0.163434	0.00150136
27	C3	4	kif2c	0.161393	0.00026155
27	C3	5	kif2c	0.160752	0.000421523
27	C3	6	kif2c	0.160395	0.000865243
27	C3	7	kif2c	0.159563	0.00083469
27	C3	8	kif2c	0.158109	0.000181387
27	C3	9	kif2c	0.154922	-0.00220494
27	C3	10	kif2c	0.153775	-0.00255113
27	C3	11	kif2c	0.153871	-0.0016542
27	C3	12	kif2c	0.154937	0.000212804
27	C3	13	kif2c	0.154379	0.000455955
27	C3	14	kif2c	0.151418	-0.00170441
27	C3	15	kif2c	0.151148	-0.00117301
27	C3	16	kif2c	0.152539	0.00101939
27	C3	17	kif2c	0.154253	0.00353377
27	C3	18	kif2c	0.160286	0.0103678
27	C3	19	kif2c	0.166592	0.0174753
27	C3	20	kif2c	0.182154	0.0338375
27	C3	21	kif2c	0.213449	0.0659335
27	C3	22	kif2c	0.272019	0.125305
27	C3	23	kif2c	0.384293	0.238379
27	C3	24	kif2c	0.590099	0.444987
27	C3	25	kif2c	0.949671	0.80536
27	C3	26	kif2c	1.50023	1.35672
27	C3	27	kif2c	2.17056	2.02785
27	C3	28	kif2c	2.72908	2.58717
27	C3	29	kif2c	3.0846	2.94349
27	C3	30	kif2c	3.35582	3.21552
27	C3	31	kif2c	3.55472	3.41522
27	C3	32	kif2c	3.69269	3.55399
27	C3	33	kif2c	3.78975	3.65185
27	C3	34	kif2c	3.85845	3.72134
27	C3	35	kif2c	3.90839	3.77208
27	C3	36	kif2c	3.94711	3.81161
27	C3	37	kif2c	3.97406	3.83936
27	C3	38	kif2c	3.99683	3.86293
27	C3	39	kif2c	4.01327	3.88017
27	C3	40	kif2c	4.0233	3.89101
27	C3	41	kif2c	4.03805	3.90656
27	C3	42	kif2c	4.05038	3.91968
27	C3	43	kif2c	4.05815	3.92825
27	C3	44	kif2c	4.0608	3.9317
27	C3	45	kif2c	4.0559	3.92761
28	C4	1	GAPDH	0.183691	0.00263362
28	C4	2	GAPDH	0.185225	0.000275827
28	C4	3	GAPDH	0.189282	0.000441187
28	C4	4	GAPDH	0.192804	7.24154e-05
28	C4	5	GAPDH	0.196602	-2.10873e-05
28	C4	6	GAPDH	0.200576	6.14375e-05
28	C4	7	GAPDH	0.203453	-0.000953747
28	C4	8	GAPDH	0.207096	-0.00120167
28	C4	9	GAPDH	0.213791	0.00160146
28	C4	10	GAPDH	0.222849	0.00676816
28	C4	11	GAPDH	0.23905	0.0190771
28	C4	12	GAPDH	0.270837	0.0469731
28	C4	13	GAPDH	0.325144	0.0973884
28	C4	14	GAPDH	0.431221	0.199573
28	C4	15	GAPDH	0.6248	0.389261
28	C4	16	GAPDH	0.961251	0.721821
28	C4	17	GAPDH	1.48332	1.24
28	C4	18	GAPDH	2.13853	1.89132
28	C4	19	GAPDH	2.73095	2.47984
28	C4	20	GAPDH	3.10622	2.85122
28	C4	21	GAPDH	3.3681	3.10922
28	C4	22	GAPDH	3.56185	3.29907
28	C4	23	GAPDH	3.69238	3.42571
28	C4	24	GAPDH	3.78386	3.5133
28	C4	25	GAPDH	3.84749	3.57303
28	C4	26	GAPDH	3.89171	3.61337
28	C4	27	GAPDH	3.92548	3.64325
28	C4	28	GAPDH	3.95045	3.66432
28	C4	29	GAPDH	3.97128	3.68126
28	C4	30	GAPDH	3.99083	3.69692
28	C4	31	GAPDH	4.00437	3.70657
28	C4	32	GAPDH	4.01571	3.71402
28	C4	33	GAPDH	4.0181	3.71251
28	C4	34	GAPDH	4.01947	3.70999
28	C4	35	GAPDH	4.01987	3.7065
28	C4	36	GAPDH	4.02602	3.70876
28	C4	37	GAPDH	4.02697	3.70581
28	C4	38	GAPDH	4.02593	3.70088
28	C4	39	GAPDH	4.03432	3.70538
28	C4	40	GAPDH	4.03618	3.70335
28	C4	41	GAPDH	4.03546	3.69874
28	C4	42	GAPDH	4.02918	3.68856
28	C4	43	GAPDH	4.02632	3.68182
28	C4	44	GAPDH	4.02307	3.67468
28	C4	45	GAPDH	4.02112	3.66883
29	C5	1	GAPDH	0.118087	0.00543648
29	C5	2	GAPDH	0.117633	0.00434817
29	C5	3	GAPDH	0.116274	0.00235499
29	C5	4	GAPDH	0.113988	-0.000565043
29	C5	5	GAPDH	0.113719	-0.00146804
29	C5	6	GAPDH	0.114546	-0.00127478
29	C5	7	GAPDH	0.115877	-0.000577608
29	C5	8	GAPDH	0.116635	-0.000453041
29	C5	9	GAPDH	0.119706	0.00198352
29	C5	10	GAPDH	0.126948	0.00859167
29	C5	11	GAPDH	0.14082	0.0218298
29	C5	12	GAPDH	0.169337	0.0497135
29	C5	13	GAPDH	0.224779	0.104521
29	C5	14	GAPDH	0.32908	0.208188
29	C5	15	GAPDH	0.523998	0.402473
29	C5	16	GAPDH	0.867527	0.745367
29	C5	17	GAPDH	1.40714	1.28435
29	C5	18	GAPDH	2.10121	1.97779
29	C5	19	GAPDH	2.7447	2.62064
29	C5	20	GAPDH	3.15863	3.03394
29	C5	21	GAPDH	3.44	3.31467
29	C5	22	GAPDH	3.65003	3.52407
29	C5	23	GAPDH	3.78965	3.66305
29	C5	24	GAPDH	3.88089	3.75366
29	C5	25	GAPDH	3.95209	3.82422
29	C5	26	GAPDH	4.00353	3.87503
29	C5	27	GAPDH	4.03916	3.91003
29	C5	28	GAPDH	4.06266	3.9329
29	C5	29	GAPDH	4.08295	3.95255
29	C5	30	GAPDH	4.09584	3.96481
29	C5	31	GAPDH	4.10605	3.97438
29	C5	32	GAPDH	4.11908	3.98678
29	C5	33	GAPDH	4.12894	3.99601
29	C5	34	GAPDH	4.13408	4.00051
29	C5	35	GAPDH	4.13627	4.00206
29	C5	36	GAPDH	4.13601	4.00117
29	C5	37	GAPDH	4.13785	4.00238
29	C5	38	GAPDH	4.14347	4.00736
29	C5	39	GAPDH	4.14662	4.00988
29	C5	40	GAPDH	4.14278	4.00541
29	C5	41	GAPDH	4.14072	4.00271
29	C5	42	GAPDH	4.13905	4.00041
29	C5	43	GAPDH	4.134	3.99473
29	C5	44	GAPDH	4.12885	3.98894
29	C5	45	GAPDH	4.12292	3.98237
30	C6	1	GAPDH	0.115773	0.0049869
30	C6	2	GAPDH	0.115724	0.00453789
30	C6	3	GAPDH	0.113721	0.00213448
30	C6	4	GAPDH	0.111972	-1.41497e-05
30	C6	5	GAPDH	0.110973	-0.00141324
30	C6	6	GAPDH	0.111181	-0.00160572
30	C6	7	GAPDH	0.11228	-0.000906255
30	C6	8	GAPDH	0.113133	-0.000453489
30	C6	9	GAPDH	0.116245	0.00225837
30	C6	10	GAPDH	0.123389	0.00900202
30	C6	11	GAPDH	0.138113	0.0233259
30	C6	12	GAPDH	0.169148	0.0539609
30	C6	13	GAPDH	0.224414	0.108827
30	C6	14	GAPDH	0.332013	0.216026
30	C6	15	GAPDH	0.531431	0.415044
30	C6	16	GAPDH	0.881771	0.764984
30	C6	17	GAPDH	1.43355	1.31636
30	C6	18	GAPDH	2.14421	2.02662
30	C6	19	GAPDH	2.80471	2.68672
30	C6	20	GAPDH	3.23018	3.11179
30	C6	21	GAPDH	3.5244	3.40561
30	C6	22	GAPDH	3.73902	3.61983
30	C6	23	GAPDH	3.87898	3.7594
30	C6	24	GAPDH	3.97049	3.8505
30	C6	25	GAPDH	4.03679	3.9164
30	C6	26	GAPDH	4.08988	3.96909
30	C6	27	GAPDH	4.12592	4.00474
30	C6	28	GAPDH	4.15072	4.02913
30	C6	29	GAPDH	4.16757	4.04558
30	C6	30	GAPDH	4.18759	4.0652
30	C6	31	GAPDH	4.20002	4.07724
30	C6	32	GAPDH	4.20646	4.08327
30	C6	33	GAPDH	4.21132	4.08773
30	C6	34	GAPDH	4.22581	4.10182
30	C6	35	GAPDH	4.23079	4.1064
30	C6	36	GAPDH	4.22776	4.10298
30	C6	37	GAPDH	4.22476	4.09957
30	C6	38	GAPDH	4.22231	4.09672
30	C6	39	GAPDH	4.2214	4.09541
30	C6	40	GAPDH	4.22364	4.09725
30	C6	41	GAPDH	4.2248	4.09801
30	C6	42	GAPDH	4.2241	4.09691
30	C6	43	GAPDH	4.22058	4.09299
30	C6	44	GAPDH	4.2185	4.09052
30	C6	45	GAPDH	4.21452	4.08613
31	C7	1
31	C7	2
31	C7	3
31	C7	4
31	C7	5
31	C7	6
31	C7	7
31	C7	8
31	C7	9
31	C7	10
31	C7	11
31	C7	12
31	C7	13
31	C7	14
31	C7	15
31	C7	16
31	C7	17
31	C7	18
31	C7	19
31	C7	20
31	C7	21
31	C7	22
31	C7	23
31	C7	24
31	C7	25
31	C7	26
31	C7	27
31	C7	28
31	C7	29
31	C7	30
31	C7	31
31	C7	32
31	C7	33
31	C7	34
31	C7	35
31	C7	36
31	C7	37
31	C7	38
31	C7	39
31	C7	40
31	C7	41
31	C7	42
31	C7	43
31	C7	44
31	C7	45
32	C8	1
32	C8	2
32	C8	3
32	C8	4
32	C8	5
32	C8	6
32	C8	7
32	C8	8
32	C8	9
32	C8	10
32	C8	11
32	C8	12
32	C8	13
32	C8	14
32	C8	15
32	C8	16
32	C8	17
32	C8	18
32	C8	19
32	C8	20
32	C8	21
32	C8	22
32	C8	23
32	C8	24
32	C8	25
32	C8	26
32	C8	27
32	C8	28
32	C8	29
32	C8	30
32	C8	31
32	C8	32
32	C8	33
32	C8	34
32	C8	35
32	C8	36
32	C8	37
32	C8	38
32	C8	39
32	C8	40
32	C8	41
32	C8	42
32	C8	43
32	C8	44
32	C8	45
33	C9	1
33	C9	2
33	C9	3
33	C9	4
33	C9	5
33	C9	6
33	C9	7
33	C9	8
33	C9	9
33	C9	10
33	C9	11
33	C9	12
33	C9	13
33	C9	14
33	C9	15
33	C9	16
33	C9	17
33	C9	18
33	C9	19
33	C9	20
33	C9	21
33	C9	22
33	C9	23
33	C9	24
33	C9	25
33	C9	26
33	C9	27
33	C9	28
33	C9	29
33	C9	30
33	C9	31
33	C9	32
33	C9	33
33	C9	34
33	C9	35
33	C9	36
33	C9	37
33	C9	38
33	C9	39
33	C9	40
33	C9	41
33	C9	42
33	C9	43
33	C9	44
33	C9	45
34	C10	1
34	C10	2
34	C10	3
34	C10	4
34	C10	5
34	C10	6
34	C10	7
34	C10	8
34	C10	9
34	C10	10
34	C10	11
34	C10	12
34	C10	13
34	C10	14
34	C10	15
34	C10	16
34	C10	17
34	C10	18
34	C10	19
34	C10	20
34	C10	21
34	C10	22
34	C10	23
34	C10	24
34	C10	25
34	C10	26
34	C10	27
34	C10	28
34	C10	29
34	C10	30
34	C10	31
34	C10	32
34	C10	33
34	C10	34
34	C10	35
34	C10	36
34	C10	37
34	C10	38
34	C10	39
34	C10	40
34	C10	41
34	C10	42
34	C10	43
34	C10	44
34	C10	45
35	C11	1
35	C11	2
35	C11	3
35	C11	4
35	C11	5
35	C11	6
35	C11	7
35	C11	8
35	C11	9
35	C11	10
35	C11	11
35	C11	12
35	C11	13
35	C11	14
35	C11	15
35	C11	16
35	C11	17
35	C11	18
35	C11	19
35	C11	20
35	C11	21
35	C11	22
35	C11	23
35	C11	24
35	C11	25
35	C11	26
35	C11	27
35	C11	28
35	C11	29
35	C11	30
35	C11	31
35	C11	32
35	C11	33
35	C11	34
35	C11	35
35	C11	36
35	C11	37
35	C11	38
35	C11	39
35	C11	40
35	C11	41
35	C11	42
35	C11	43
35	C11	44
35	C11	45
36	C12	1
36	C12	2
36	C12	3
36	C12	4
36	C12	5
36	C12	6
36	C12	7
36	C12	8
36	C12	9
36	C12	10
36	C12	11
36	C12	12
36	C12	13
36	C12	14
36	C12	15
36	C12	16
36	C12	17
36	C12	18
36	C12	19
36	C12	20
36	C12	21
36	C12	22
36	C12	23
36	C12	24
36	C12	25
36	C12	26
36	C12	27
36	C12	28
36	C12	29
36	C12	30
36	C12	31
36	C12	32
36	C12	33
36	C12	34
36	C12	35
36	C12	36
36	C12	37
36	C12	38
36	C12	39
36	C12	40
36	C12	41
36	C12	42
36	C12	43
36	C12	44
36	C12	45
37	D1	1	kif2c	0.154808	-0.00135473
37	D1	2	kif2c	0.156226	7.0856e-05
37	D1	3	kif2c	0.156863	0.000715546
37	D1	4	kif2c	0.156907	0.000768033
37	D1	5	kif2c	0.15718	0.00104933
37	D1	6	kif2c	0.155921	-0.00020141
37	D1	7	kif2c	0.15562	-0.00049448
37	D1	8	kif2c	0.156086	-2.05872e-05
37	D1	9	kif2c	0.155761	-0.000337917
37	D1	10	kif2c	0.154903	-0.00118783
37	D1	11	kif2c	0.154865	-0.00121737
37	D1	12	kif2c	0.154791	-0.00128305
37	D1	13	kif2c	0.155041	-0.00102531
37	D1	14	kif2c	0.155698	-0.000359852
37	D1	15	kif2c	0.157125	0.00107509
37	D1	16	kif2c	0.158562	0.00251981
37	D1	17	kif2c	0.164667	0.00863282
37	D1	18	kif2c	0.17589	0.0198636
37	D1	19	kif2c	0.201018	0.0450005
37	D1	20	kif2c	0.246604	0.0905943
37	D1	21	kif2c	0.335363	0.179361
37	D1	22	kif2c	0.502727	0.346733
37	D1	23	kif2c	0.799135	0.643149
37	D1	24	kif2c	1.28511	1.12913
37	D1	25	kif2c	1.95574	1.79977
37	D1	26	kif2c	2.65743	2.50147
37	D1	27	kif2c	3.1607	3.00474
37	D1	28	kif2c	3.45791	3.30196
37	D1	29	kif2c	3.66917	3.51324
37	D1	30	kif2c	3.81418	3.65825
37	D1	31	kif2c	3.9081	3.75218
37	D1	32	kif2c	3.96977	3.81386
37	D1	33	kif2c	4.01383	3.85793
37	D1	34	kif2c	4.046	3.8901
37	D1	35	kif2c	4.06909	3.9132
37	D1	36	kif2c	4.08789	3.93201
37	D1	37	kif2c	4.09804	3.94217
37	D1	38	kif2c	4.10166	3.94579
37	D1	39	kif2c	4.10593	3.95008
37	D1	40	kif2c	4.10946	3.95361
37	D1	41	kif2c	4.11108	3.95524
37	D1	42	kif2c	4.1149	3.95907
37	D1	43	kif2c	4.11303	3.95721
37	D1	44	kif2c	4.10666	3.95084
37	D1	45	kif2c	4.09554	3.93973
38	D2	1	kif2c	0.161849	0.00145348
38	D2	2	kif2c	0.161857	0.00177024
38	D2	3	kif2c	0.161805	0.00202853
38	D2	4	kif2c	0.160081	0.000613682
38	D2	5	kif2c	0.159458	0.000299781
38	D2	6	kif2c	0.158863	1.38792e-05
38	D2	7	kif2c	0.158426	-0.000113445
38	D2	8	kif2c	0.157191	-0.00103926
38	D2	9	kif2c	0.156521	-0.001399
38	D2	10	kif2c	0.156469	-0.00114244
38	D2	11	kif2c	0.156238	-0.00106337
38	D2	12	kif2c	0.156228	-0.000764204
38	D2	13	kif2c	0.15593	-0.000753185
38	D2	14	kif2c	0.155839	-0.000533953
38	D2	15	kif2c	0.156576	0.000512428
38	D2	16	kif2c	0.159095	0.00334056
38	D2	17	kif2c	0.164432	0.00898664
38	D2	18	kif2c	0.176886	0.0217504
38	D2	19	kif2c	0.200376	0.0455496
38	D2	20	kif2c	0.246297	0.09178
38	D2	21	kif2c	0.333633	0.179425
38	D2	22	kif2c	0.499285	0.345387
38	D2	23	kif2c	0.793718	0.64013
38	D2	24	kif2c	1.27534	1.12206
38	D2	25	kif2c	1.93749	1.78452
38	D2	26	kif2c	2.63678	2.48411
38	D2	27	kif2c	3.1388	2.98644
38	D2	28	kif2c	3.44232	3.29028
38	D2	29	kif2c	3.64999	3.49826
38	D2	30	kif2c	3.79596	3.64453
38	D2	31	kif2c	3.88932	3.73821
38	D2	32	kif2c	3.95496	3.80415
38	D2	33	kif2c	4.0002	3.84971
38	D2	34	kif2c	4.0315	3.88131
38	D2	35	kif2c	4.05284	3.90296
38	D2	36	kif2c	4.07058	3.92101
38	D2	37	kif2c	4.08201	3.93276
38	D2	38	kif2c	4.09179	3.94284
38	D2	39	kif2c	4.097	3.94836
38	D2	40	kif2c	4.09848	3.95015
38	D2	41	kif2c	4.09946	3.95144
38	D2	42	kif2c	4.10247	3.95476
38	D2	43	kif2c	4.10091	3.95351
38	D2	44	kif2c	4.09611	3.94902
38	D2	45	kif2c	4.08734	3.94056
39	D3	1	kif2c	0.151495	0.00146889
39	D3	2	kif2c	0.150457	0.00088631
39	D3	3	kif2c	0.149806	0.000691967
39	D3	4	kif2c	0.149657	0.000998541
39	D3	5	kif2c	0.148524	0.000321042
39	D3	6	kif2c	0.146909	-0.000837495
39	D3	7	kif2c	0.146439	-0.00085146
39	D3	8	kif2c	0.1465	-0.00033472
39	D3	9	kif2c	0.146181	-0.00019784
39	D3	10	kif2c	0.145246	-0.000676274
39	D3	11	kif2c	0.145144	-0.000322583
39	D3	12	kif2c	0.145309	0.000299017
39	D3	13	kif2c	0.144148	-0.000405945
39	D3	14	kif2c	0.144066	-3.2211e-05
39	D3	15	kif2c	0.14499	0.00134796
39	D3	16	kif2c	0.147948	0.00476205
39	D3	17	kif2c	0.154839	0.0121091
39	D3	18	kif2c	0.16595	0.0236755
39	D3	19	kif2c	0.187409	0.0455912
39	D3	20	kif2c	0.232176	0.0908142
39	D3	21	kif2c	0.316255	0.175349
39	D3	22	kif2c	0.474294	0.333844
39	D3	23	kif2c	0.758192	0.618198
39	D3	24	kif2c	1.22731	1.08777
39	D3	25	kif2c	1.88541	1.74633
39	D3	26	kif2c	2.59539	2.45676
39	D3	27	kif2c	3.1304	2.99223
39	D3	28	kif2c	3.44195	3.30424
39	D3	29	kif2c	3.65955	3.52229
39	D3	30	kif2c	3.80932	3.67252
39	D3	31	kif2c	3.91025	3.7739
39	D3	32	kif2c	3.97545	3.83956
39	D3	33	kif2c	4.02046	3.88503
39	D3	34	kif2c	4.05613	3.92115
39	D3	35	kif2c	4.07963	3.94511
39	D3	36	kif2c	4.09307	3.959
39	D3	37	kif2c	4.10797	3.97436
39	D3	38	kif2c	4.11596	3.9828
39	D3	39	kif2c	4.12056	3.98786
39	D3	40	kif2c	4.12047	3.98823
39	D3	41	kif2c	4.12127	3.98948
39	D3	42	kif2c	4.12376	3.99243
39	D3	43	kif2c	4.12252	3.99165
39	D3	44	kif2c	4.11686	3.98644
39	D3	45	kif2c	4.11127	3.98131
40	D4	1	GAPDH	0.117226	0.000837959
40	D4	2	GAPDH	0.117458	0.00063734
40	D4	3	GAPDH	0.117813	0.000560491
40	D4	4	GAPDH	0.117739	5.47557e-05
40	D4	5	GAPDH	0.117737	-0.000378723
40	D4	6	GAPDH	0.117898	-0.000649713
40	D4	7	GAPDH	0.118393	-0.00058588
40	D4	8	GAPDH	0.12041	0.00099907
40	D4	9	GAPDH	0.124666	0.00482351
40	D4	10	GAPDH	0.133971	0.0136965
40	D4	11	GAPDH	0.151059	0.0303526
40	D4	12	GAPDH	0.186414	0.0652761
40	D4	13	GAPDH	0.255182	0.133612
40	D4	14	GAPDH	0.384565	0.262563
40	D4	15	GAPDH	0.623857	0.501423
40	D4	16	GAPDH	1.031	0.908135
40	D4	17	GAPDH	1.64011	1.51681
40	D4	18	GAPDH	2.36442	2.24069
40	D4	19	GAPDH	2.96673	2.84257
40	D4	20	GAPDH	3.33738	3.21279
40	D4	21	GAPDH	3.58993	3.4649
40	D4	22	GAPDH	3.76579	3.64033
40	D4	23	GAPDH	3.87772	3.75183
40	D4	24	GAPDH	3.95731	3.83099
40	D4	25	GAPDH	4.01465	3.88789
40	D4	26	GAPDH	4.06031	3.93313
40	D4	27	GAPDH	4.09286	3.96524
40	D4	28	GAPDH	4.11336	3.98532
40	D4	29	GAPDH	4.13052	4.00205
40	D4	30	GAPDH	4.14339	4.01448
40	D4	31	GAPDH	4.15376	4.02442
40	D4	32	GAPDH	4.15865	4.02888
40	D4	33	GAPDH	4.16347	4.03326
40	D4	34	GAPDH	4.16817	4.03753
40	D4	35	GAPDH	4.16282	4.03175
40	D4	36	GAPDH	4.16351	4.03201
40	D4	37	GAPDH	4.16911	4.03718
40	D4	38	GAPDH	4.17649	4.04412
40	D4	39	GAPDH	4.17795	4.04516
40	D4	40	GAPDH	4.17294	4.03971
40	D4	41	GAPDH	4.16909	4.03543
40	D4	42	GAPDH	4.17077	4.03668
40	D4	43	GAPDH	4.17143	4.0369
40	D4	44	GAPDH	4.16841	4.03345
40	D4	45	GAPDH	4.16042	4.02504
41	D5	1	GAPDH	0.12895	0.00552042
41	D5	2	GAPDH	0.128951	0.00456012
41	D5	3	GAPDH	0.127837	0.002484
41	D5	4	GAPDH	0.125937	-0.000378654
41	D5	5	GAPDH	0.125949	-0.00132775
41	D5	6	GAPDH	0.126798	-0.001441
41	D5	7	GAPDH	0.127611	-0.00159059
41	D5	8	GAPDH	0.129968	-0.000195583
41	D5	9	GAPDH	0.133575	0.00244957
41	D5	10	GAPDH	0.142749	0.0106616
41	D5	11	GAPDH	0.160231	0.0271822
41	D5	12	GAPDH	0.194407	0.0603955
41	D5	13	GAPDH	0.262009	0.127036
41	D5	14	GAPDH	0.389315	0.25338
41	D5	15	GAPDH	0.62227	0.485373
41	D5	16	GAPDH	1.02205	0.884186
41	D5	17	GAPDH	1.62577	1.48695
41	D5	18	GAPDH	2.34481	2.20503
41	D5	19	GAPDH	2.95401	2.81327
41	D5	20	GAPDH	3.32943	3.18772
41	D5	21	GAPDH	3.58541	3.44275
41	D5	22	GAPDH	3.76778	3.62414
41	D5	23	GAPDH	3.88882	3.74423
41	D5	24	GAPDH	3.96785	3.82229
41	D5	25	GAPDH	4.02532	3.87881
41	D5	26	GAPDH	4.06702	3.91954
41	D5	27	GAPDH	4.09806	3.94962
41	D5	28	GAPDH	4.12047	3.97107
41	D5	29	GAPDH	4.1428	3.99244
41	D5	30	GAPDH	4.15707	4.00574
41	D5	31	GAPDH	4.16995	4.01766
41	D5	32	GAPDH	4.17206	4.01881
41	D5	33	GAPDH	4.17387	4.01966
41	D5	34	GAPDH	4.18045	4.02528
41	D5	35	GAPDH	4.18461	4.02847
41	D5	36	GAPDH	4.18633	4.02923
41	D5	37	GAPDH	4.18713	4.02906
41	D5	38	GAPDH	4.1893	4.03028
41	D5	39	GAPDH	4.18614	4.02615
41	D5	40	GAPDH	4.18253	4.02158
41	D5	41	GAPDH	4.17835	4.01644
41	D5	42	GAPDH	4.18021	4.01734
41	D5	43	GAPDH	4.17706	4.01323
41	D5	44	GAPDH	4.17295	4.00815
41	D5	45	GAPDH	4.16709	4.00134
42	D6	1	GAPDH	0.110594	0.00530542
42	D6	2	GAPDH	0.110238	0.00383363
42	D6	3	GAPDH	0.109596	0.00207575
42	D6	4	GAPDH	0.108802	0.000165896
42	D6	5	GAPDH	0.108734	-0.00101779
42	D6	6	GAPDH	0.109029	-0.00183867
42	D6	7	GAPDH	0.110093	-0.00189089
42	D6	8	GAPDH	0.113185	8.50164e-05
42	D6	9	GAPDH	0.116637	0.0024207
42	D6	10	GAPDH	0.125392	0.0100596
42	D6	11	GAPDH	0.143339	0.0268911
42	D6	12	GAPDH	0.177498	0.0599338
42	D6	13	GAPDH	0.245344	0.126664
42	D6	14	GAPDH	0.371811	0.252015
42	D6	15	GAPDH	0.605409	0.484497
42	D6	16	GAPDH	1.00667	0.884646
42	D6	17	GAPDH	1.60903	1.48589
42	D6	18	GAPDH	2.32698	2.20272
42	D6	19	GAPDH	2.92642	2.80104
42	D6	20	GAPDH	3.29522	3.16873
42	D6	21	GAPDH	3.54869	3.42108
42	D6	22	GAPDH	3.72849	3.59976
42	D6	23	GAPDH	3.84786	3.71802
42	D6	24	GAPDH	3.93086	3.7999
42	D6	25	GAPDH	3.99087	3.8588
42	D6	26	GAPDH	4.03518	3.90199
42	D6	27	GAPDH	4.06414	3.92984
42	D6	28	GAPDH	4.0837	3.94828
42	D6	29	GAPDH	4.10227	3.96573
42	D6	30	GAPDH	4.11778	3.98013
42	D6	31	GAPDH	4.12905	3.99028
42	D6	32	GAPDH	4.14006	4.00017
42	D6	33	GAPDH	4.14602	4.00502
42	D6	34	GAPDH	4.15276	4.01064
42	D6	35	GAPDH	4.15426	4.01103
42	D6	36	GAPDH	4.1503	4.00595
42	D6	37	GAPDH	4.15069	4.00523
42	D6	38	GAPDH	4.14812	4.00154
42	D6	39	GAPDH	4.146	3.9983
42	D6	40	GAPDH	4.14376	3.99495
42	D6	41	GAPDH	4.14022	3.9903
42	D6	42	GAPDH	4.13975	3.98871
42	D6	43	GAPDH	4.13768	3.98552
42	D6	44	GAPDH	4.13716	3.98388
42	D6	45	GAPDH	4.13362	3.97923
43	D7	1
43	D7	2
43	D7	3
43	D7	4
43	D7	5
43	D7	6
43	D7	7
43	D7	8
43	D7	9
43	D7	10
43	D7	11
43	D7	12
43	D7	13
43	D7	14
43	D7	15
43	D7	16
43	D7	17
43	D7	18
43	D7	19
43	D7	20
43	D7	21
43	D7	22
43	D7	23
43	D7	24
43	D7	25
43	D7	26
43	D7	27
43	D7	28
43	D7	29
43	D7	30
43	D7	31
43	D7	32
43	D7	33
43	D7	34
43	D7	35
43	D7	36
43	D7	37
43	D7	38
43	D7	39
43	D7	40
43	D7	41
43	D7	42
43	D7	43
43	D7	44
43	D7	45
44	D8	1
44	D8	2
44	D8	3
44	D8	4
44	D8	5
44	D8	6
44	D8	7
44	D8	8
44	D8	9
44	D8	10
44	D8	11
44	D8	12
44	D8	13
44	D8	14
44	D8	15
44	D8	16
44	D8	17
44	D8	18
44	D8	19
44	D8	20
44	D8	21
44	D8	22
[truncated: 2,363 more rows]

## Sheet: Results
AT0	kif2c	23.1361	23.2007
AT0	kif2c	23.2722
AT0	kif2c	23.1937
AT0	GAPDH	14.0736	14.1339
AT0	GAPDH	14.1637
AT0	GAPDH	14.1645
AT1	kif2c	23.3471	23.3979
AT1	kif2c	23.4104
AT1	kif2c	23.4363
AT1	GAPDH	14.2745	14.4023
AT1	GAPDH	14.3682
AT1	GAPDH	14.5642
AT2	kif2c	23.6278	23.7299
AT2	kif2c	23.8096
AT2	kif2c	23.7524
AT2	GAPDH	14.9072	14.858
AT2	GAPDH	14.8564
AT2	GAPDH	14.8104
AC0	kif2c	22.1411	22.1632
AC0	kif2c	22.145
AC0	kif2c	22.2035
AC0	GAPDH	14.5082	14.5455
AC0	GAPDH	14.5629
AC0	GAPDH	14.5652
AC1	kif2c	22.1466	22.219
AC1	kif2c	22.1879
AC1	kif2c	22.3223
AC1	GAPDH	14.7745	14.7235
AC1	GAPDH	14.6813
AC1	GAPDH	14.7148
AC2	kif2c	22.0544	22.1032
AC2	kif2c	22.0808
AC2	kif2c	22.1745
AC2	GAPDH	14.6787	14.7076
AC2	GAPDH	14.681
AC2	GAPDH	14.7631

## Sheet: Melt Curve Raw Data
Block Type	96-Well 0.2-mL Block
Calibration Background is expired	No
Calibration Background performed on	09-09-2019
Calibration Pure Dye ABY is expired	No
Calibration Pure Dye ABY performed on	09-09-2019
Calibration Pure Dye FAM is expired	No
Calibration Pure Dye FAM performed on	09-09-2019
Calibration Pure Dye JUN is expired	No
Calibration Pure Dye JUN performed on	09-09-2019
Calibration Pure Dye NED is expired	No
Calibration Pure Dye NED performed on	09-09-2019
Calibration Pure Dye ROX is expired	No
Calibration Pure Dye ROX performed on	09-09-2019
Calibration Pure Dye SYBR is expired	No
Calibration Pure Dye SYBR performed on	09-09-2019
Calibration Pure Dye TAMRA is expired	No
Calibration Pure Dye TAMRA performed on	09-09-2019
Calibration Pure Dye VIC is expired	No
Calibration Pure Dye VIC performed on	09-09-2019
Calibration ROI is expired	No
Calibration ROI performed on	09-09-2019
Calibration Uniformity is expired	No
Calibration Uniformity performed on	09-09-2019
Chemistry	SYBR_GREEN
Date Created	2021-04-26 22:51:25 PM PDT
Experiment Barcode
Experiment Comment
Experiment File Name	D:\WWW\2021-04-26_205009.eds
Experiment Name	2021-04-26_205009
Experiment Run End Time	2021-04-26 15:32:46 PM PDT
Experiment Type	Comparative Cт (ΔΔCт)
Instrument Name	2763219080101
Instrument Serial Number	2763219080101
Instrument Type	QuantStudio™ 3 System
Passive Reference	ROX
Post-read Stage/Step
Pre-read Stage/Step
Quantification Cycle Method	Ct
Signal Smoothing On	true
Stage where Melt Analysis is performed	Stage3
Stage/ Cycle where Ct Analysis is performed	Stage2, Step2
User Name
Well	Well Position	Reading	Temperature	Fluorescence	Derivative	Target Name
1	A1	1	60.0007	1.10026e+06	23484.9	kif2c
1	A1	2	60.308	1.09456e+06	23849.5	kif2c
1	A1	3	60.6152	1.08754e+06	24253.4	kif2c
1	A1	4	60.9225	1.08276e+06	24664.9	kif2c
1	A1	5	61.2297	1.07504e+06	25054.9	kif2c
1	A1	6	61.537	1.06625e+06	25420.6	kif2c
1	A1	7	61.8442	1.05844e+06	25796.9	kif2c
1	A1	8	62.1515	1.04967e+06	26142.9	kif2c
1	A1	9	62.4588	1042480	26475.4	kif2c
1	A1	10	62.766	1.0333e+06	26800.6	kif2c
1	A1	11	63.0733	1.02571e+06	27107.9	kif2c
1	A1	12	63.3805	1.01626e+06	27372.4	kif2c
1	A1	13	63.6878	1.0075e+06	27566.4	kif2c
1	A1	14	63.9951	999264	27671.6	kif2c
1	A1	15	64.3023	989560	27690.6	kif2c
1	A1	16	64.6096	980401	27649.6	kif2c
1	A1	17	64.9168	971532	27591.3	kif2c
1	A1	18	65.2241	962647	27557.9	kif2c
1	A1	19	65.5313	954844	27570.5	kif2c
1	A1	20	65.8386	946468	27619.7	kif2c
1	A1	21	66.1459	936794	27670.6	kif2c
1	A1	22	66.4531	928070	27682.3	kif2c
1	A1	23	66.7604	919651	27630.4	kif2c
1	A1	24	67.0676	909626	27518.7	kif2c
1	A1	25	67.3749	901401	27376.3	kif2c
1	A1	26	67.6822	893228	27240.9	kif2c
1	A1	27	67.9894	884603	27141.5	kif2c
1	A1	28	68.2967	876186	27085.2	kif2c
1	A1	29	68.6039	867686	27057	kif2c
1	A1	30	68.9112	859109	27029.2	kif2c
1	A1	31	69.2184	850796	26976.4	kif2c
1	A1	32	69.5257	841418	26887.7	kif2c
1	A1	33	69.833	832538	26770.1	kif2c
1	A1	34	70.1402	824976	26642.4	kif2c
1	A1	35	70.4475	815893	26522.7	kif2c
1	A1	36	70.7547	808020	26417	kif2c
1	A1	37	71.062	799345	26317.3	kif2c
1	A1	38	71.3692	790389	26207.7	kif2c
1	A1	39	71.6765	782075	26074.3	kif2c
1	A1	40	71.9838	773718	25909.4	kif2c
1	A1	41	72.291	766009	25713.4	kif2c
1	A1	42	72.5983	756680	25491.6	kif2c
1	A1	43	72.9055	749220	25268.7	kif2c
1	A1	44	73.2128	740982	25071.1	kif2c
1	A1	45	73.5201	732649	24884.8	kif2c
1	A1	46	73.8273	726300	24716.3	kif2c
1	A1	47	74.1346	717880	24562.1	kif2c
1	A1	48	74.4418	709362	24413.3	kif2c
1	A1	49	74.7491	702651	24264	kif2c
1	A1	50	75.0564	694569	24119.6	kif2c
1	A1	51	75.3636	687009	23998.3	kif2c
1	A1	52	75.6709	680641	23920.7	kif2c
1	A1	53	75.9781	673644	23895.8	kif2c
1	A1	54	76.2854	666018	23914.8	kif2c
1	A1	55	76.5926	659105	23961	kif2c
1	A1	56	76.8999	649446	24038.2	kif2c
1	A1	57	77.2072	643176	24207.5	kif2c
1	A1	58	77.5144	636216	24627.8	kif2c
1	A1	59	77.8217	627877	25648.7	kif2c
1	A1	60	78.1289	621366	28042.3	kif2c
1	A1	61	78.4362	614553	32493.9	kif2c
1	A1	62	78.7434	605637	40062.1	kif2c
1	A1	63	79.0507	597796	51896.7	kif2c
1	A1	64	79.358	589069	68931.2	kif2c
1	A1	65	79.6652	574793	91437.3	kif2c
1	A1	66	79.9725	552870	118570	kif2c
1	A1	67	80.2797	518713	148116	kif2c
1	A1	68	80.587	456522	176628	kif2c
1	A1	69	80.8943	378859	200008	kif2c
1	A1	70	81.2015	299940	214393	kif2c
1	A1	71	81.5088	220823	217095	kif2c
1	A1	72	81.816	143439	207295	kif2c
1	A1	73	82.1233	80111	186302	kif2c
1	A1	74	82.4305	34568	157275	kif2c
1	A1	75	82.7378	15708.8	124479	kif2c
1	A1	76	83.0451	11595.3	92260	kif2c
1	A1	77	83.3523	9725.56	64062.7	kif2c
1	A1	78	83.6596	8013.51	41805.3	kif2c
1	A1	79	83.9668	5759.91	25797	kif2c
1	A1	80	84.2741	2032.34	16833.6	kif2c
1	A1	81	84.5814	-2494.05	11192.6	kif2c
1	A1	82	84.8886	-4900.39	7606.11	kif2c
1	A1	83	85.1959	-5303.66	5198.29	kif2c
1	A1	84	85.5031	-5484.38	3467.38	kif2c
1	A1	85	85.8104	-4135.67	2187.92	kif2c
1	A1	86	86.1176	-4964.59	1269.32	kif2c
1	A1	87	86.4249	-6105.8	652.693	kif2c
1	A1	88	86.7322	-5455.31	272.037	kif2c
1	A1	89	87.0394	-5281.06	59.3164	kif2c
1	A1	90	87.3467	-5461.35	-40.6172	kif2c
1	A1	91	87.6539	-5141.15	-66.1523	kif2c
1	A1	92	87.9612	-5584.14	-45.875	kif2c
1	A1	93	88.2684	-6117.7	-5.89844	kif2c
1	A1	94	88.5757	-5785.28	29.4492	kif2c
1	A1	95	88.883	-6318.08	42.1055	kif2c
1	A1	96	89.1902	-6410.9	24.5469	kif2c
1	A1	97	89.4975	-6138.97	-19.5117	kif2c
1	A1	98	89.8047	-6785.26	-77.7148	kif2c
1	A1	99	90.112	-6324.23	-133.297	kif2c
1	A1	100	90.4193	-6266.9	-170.066	kif2c
1	A1	101	90.7265	-6365.91	-177.764	kif2c
1	A1	102	91.0338	-6271.59	-156.543	kif2c
1	A1	103	91.341	-6748.84	-118.07	kif2c
1	A1	104	91.6483	-6881.76	-81.5586	kif2c
1	A1	105	91.9555	-6779.46	-65.5508	kif2c
1	A1	106	92.2628	-7622.24	-79.4492	kif2c
1	A1	107	92.5701	-6837.55	-119.414	kif2c
1	A1	108	92.8773	-6762.57	-171.062	kif2c
1	A1	109	93.1846	-7012.25	-217.201	kif2c
1	A1	110	93.4918	-7288.17	-245.836	kif2c
1	A1	111	93.7991	-6749.27	-254.061	kif2c
1	A1	112	94.1064	-7371.65	-246.725	kif2c
1	A1	113	94.4136	-6906.39	-232.109	kif2c
1	A1	114	94.7209	-7288.84	-217.732	kif2c
2	A2	1	60.0007	946529	19660.3	kif2c
2	A2	2	60.308	940932	19985.5	kif2c
2	A2	3	60.6152	936208	20369.6	kif2c
2	A2	4	60.9225	930808	20809.3	kif2c
2	A2	5	61.2297	925930	21287.2	kif2c
2	A2	6	61.537	918607	21770.1	kif2c
2	A2	7	61.8442	911487	22264.5	kif2c
2	A2	8	62.1515	905081	22707.7	kif2c
2	A2	9	62.4588	896073	23050.2	kif2c
2	A2	10	62.766	889365	23302.9	kif2c
2	A2	11	63.0733	882215	23497.1	kif2c
2	A2	12	63.3805	874650	23666.1	kif2c
2	A2	13	63.6878	866712	23827.4	kif2c
2	A2	14	63.9951	859890	23976.3	kif2c
2	A2	15	64.3023	852922	24092.5	kif2c
2	A2	16	64.6096	843727	24157.8	kif2c
2	A2	17	64.9168	835158	24169.8	kif2c
2	A2	18	65.2241	828306	24143.9	kif2c
2	A2	19	65.5313	821070	24102.9	kif2c
2	A2	20	65.8386	813802	24061.4	kif2c
2	A2	21	66.1459	804857	24019.7	kif2c
2	A2	22	66.4531	798296	23967	kif2c
2	A2	23	66.7604	790564	23891.7	kif2c
2	A2	24	67.0676	782567	23788.7	kif2c
2	A2	25	67.3749	774890	23663.4	kif2c
2	A2	26	67.6822	767890	23531.3	kif2c
2	A2	27	67.9894	760113	23414.7	kif2c
2	A2	28	68.2967	753189	23336.7	kif2c
2	A2	29	68.6039	745385	23310.1	kif2c
2	A2	30	68.9112	738425	23329.1	kif2c
2	A2	31	69.2184	732346	23363.8	kif2c
2	A2	32	69.5257	723912	23368.5	kif2c
2	A2	33	69.833	715309	23301.4	kif2c
2	A2	34	70.1402	708433	23145.3	kif2c
2	A2	35	70.4475	700166	22917.3	kif2c
2	A2	36	70.7547	693669	22661.2	kif2c
2	A2	37	71.062	687634	22426.4	kif2c
2	A2	38	71.3692	678486	22248.8	kif2c
2	A2	39	71.6765	673092	22140.2	kif2c
2	A2	40	71.9838	665324	22089	kif2c
2	A2	41	72.291	658644	22068	kif2c
2	A2	42	72.5983	650962	22046	kif2c
2	A2	43	72.9055	643976	21998.4	kif2c
2	A2	44	73.2128	636651	21921	kif2c
2	A2	45	73.5201	629992	21825.2	kif2c
2	A2	46	73.8273	623313	21715.9	kif2c
2	A2	47	74.1346	616260	21604.2	kif2c
2	A2	48	74.4418	609523	21494	kif2c
2	A2	49	74.7491	603538	21382	kif2c
2	A2	50	75.0564	596235	21263.4	kif2c
2	A2	51	75.3636	589194	21138.2	kif2c
2	A2	52	75.6709	583166	21015.6	kif2c
2	A2	53	75.9781	577680	20909.1	kif2c
2	A2	54	76.2854	570797	20831.5	kif2c
2	A2	55	76.5926	564838	20794	kif2c
2	A2	56	76.8999	557472	20819.5	kif2c
2	A2	57	77.2072	551745	20970	kif2c
2	A2	58	77.5144	544553	21383.7	kif2c
2	A2	59	77.8217	538671	22380.8	kif2c
2	A2	60	78.1289	532834	24573	kif2c
2	A2	61	78.4362	526276	28553.3	kif2c
2	A2	62	78.7434	519414	35195.2	kif2c
2	A2	63	79.0507	511763	45418.2	kif2c
2	A2	64	79.358	503511	59919.1	kif2c
2	A2	65	79.6652	491272	78794.8	kif2c
2	A2	66	79.9725	471933	101178	kif2c
2	A2	67	80.2797	440238	125067	kif2c
2	A2	68	80.587	385623	147499	kif2c
2	A2	69	80.8943	319571	165092	kif2c
2	A2	70	81.2015	253674	174833	kif2c
2	A2	71	81.5088	188490	174849	kif2c
2	A2	72	81.816	126578	164930	kif2c
2	A2	73	82.1233	76952.9	146634	kif2c
2	A2	74	82.4305	45532.7	122921	kif2c
2	A2	75	82.7378	34616.7	97410.1	kif2c
2	A2	76	83.0451	32204.7	73473.1	kif2c
2	A2	77	83.3523	28402.5	53456.5	kif2c
2	A2	78	83.6596	23769.5	38302.5	kif2c
2	A2	79	83.9668	18493.8	27662	kif2c
2	A2	80	84.2741	10346.6	20626.3	kif2c
2	A2	81	84.5814	705.868	16193.6	kif2c
2	A2	82	84.8886	-2439.62	12643.8	kif2c
2	A2	83	85.1959	-3046.32	9539.53	kif2c
2	A2	84	85.5031	-2895.67	6802.4	kif2c
2	A2	85	85.8104	-3057.02	4530.18	kif2c
2	A2	86	86.1176	-2421.79	2819.07	kif2c
2	A2	87	86.4249	-3182.54	1668.86	kif2c
2	A2	88	86.7322	-3203.02	979.541	kif2c
2	A2	89	87.0394	-3840.16	602.529	kif2c
2	A2	90	87.3467	-4152.2	399.168	kif2c
2	A2	91	87.6539	-3833.25	275.678	kif2c
2	A2	92	87.9612	-3700.45	187.326	kif2c
2	A2	93	88.2684	-4159.88	122.117	kif2c
2	A2	94	88.5757	-3814.77	79.8477	kif2c
2	A2	95	88.883	-4443.03	58.0996	kif2c
2	A2	96	89.1902	-3924.89	48.1895	kif2c
2	A2	97	89.4975	-4567.05	37.9434	kif2c
2	A2	98	89.8047	-4326.59	16.7539	kif2c
2	A2	99	90.112	-4772.39	-19.9629	kif2c
2	A2	100	90.4193	-4496.09	-68.3086	kif2c
2	A2	101	90.7265	-4360.35	-116.492	kif2c
2	A2	102	91.0338	-4641.69	-149.188	kif2c
2	A2	103	91.341	-3983.39	-154.799	kif2c
2	A2	104	91.6483	-4264.74	-132.361	kif2c
2	A2	105	91.9555	-4646.72	-93.7852	kif2c
2	A2	106	92.2628	-4943.23	-58.9023	kif2c
2	A2	107	92.5701	-4724.71	-45.3223	kif2c
2	A2	108	92.8773	-5238.11	-58.8652	kif2c
2	A2	109	93.1846	-4156.61	-90.6895	kif2c
2	A2	110	93.4918	-5135.51	-122.941	kif2c
2	A2	111	93.7991	-4373.2	-139.096	kif2c
2	A2	112	94.1064	-4621.31	-132.42	kif2c
2	A2	113	94.4136	-5236.54	-107.854	kif2c
2	A2	114	94.7209	-4896.2	-77.2715	kif2c
3	A3	1	60.0007	1.07035e+06	21388.7	kif2c
3	A3	2	60.308	1065487	21808.4	kif2c
3	A3	3	60.6152	1.0603e+06	22298.1	kif2c
3	A3	4	60.9225	1.05482e+06	22839.2	kif2c
3	A3	5	61.2297	1.04774e+06	23400.1	kif2c
3	A3	6	61.537	1.04019e+06	23943.1	kif2c
3	A3	7	61.8442	1032861	24437.4	kif2c
3	A3	8	62.1515	1.02434e+06	24918.2	kif2c
3	A3	9	62.4588	1.01655e+06	25306.7	kif2c
3	A3	10	62.766	1.00814e+06	25617.6	kif2c
3	A3	11	63.0733	999620	25877.8	kif2c
3	A3	12	63.3805	991594	26111.5	kif2c
3	A3	13	63.6878	984022	26328.8	kif2c
3	A3	14	63.9951	975305	26524.2	kif2c
3	A3	15	64.3023	966285	26687.5	kif2c
3	A3	16	64.6096	957565	26815.2	kif2c
3	A3	17	64.9168	948346	26915.2	kif2c
3	A3	18	65.2241	940167	26999.4	kif2c
3	A3	19	65.5313	932253	27072	kif2c
3	A3	20	65.8386	923331	27122.8	kif2c
3	A3	21	66.1459	914462	27133.3	kif2c
3	A3	22	66.4531	904843	27089.8	kif2c
3	A3	23	66.7604	897555	26992	kif2c
3	A3	24	67.0676	888143	26853.3	kif2c
3	A3	25	67.3749	879444	26693.1	kif2c
3	A3	26	67.6822	871814	26529.2	kif2c
3	A3	27	67.9894	862870	26374.8	kif2c
3	A3	28	68.2967	855080	26238.8	kif2c
3	A3	29	68.6039	845518	26128.8	kif2c
3	A3	30	68.9112	838475	26046.5	kif2c
3	A3	31	69.2184	830995	25985.6	kif2c
3	A3	32	69.5257	821908	25931.7	kif2c
3	A3	33	69.833	812519	25868.8	kif2c
3	A3	34	70.1402	805055	25788.1	kif2c
3	A3	35	70.4475	796866	25691.8	kif2c
3	A3	36	70.7547	788401	25589.8	kif2c
3	A3	37	71.062	780104	25490.2	kif2c
3	A3	38	71.3692	772296	25393	kif2c
3	A3	39	71.6765	763698	25288.4	kif2c
3	A3	40	71.9838	756127	25161.9	kif2c
3	A3	41	72.291	747413	25002.1	kif2c
3	A3	42	72.5983	738406	24808.9	kif2c
3	A3	43	72.9055	732051	24594.4	kif2c
3	A3	44	73.2128	723872	24382.3	kif2c
3	A3	45	73.5201	715856	24208.9	kif2c
3	A3	46	73.8273	708645	24055.8	kif2c
3	A3	47	74.1346	700730	23920.5	kif2c
3	A3	48	74.4418	693406	23795.6	kif2c
3	A3	49	74.7491	686068	23673.4	kif2c
3	A3	50	75.0564	678669	23552.6	kif2c
3	A3	51	75.3636	670750	23440	kif2c
3	A3	52	75.6709	664293	23349	kif2c
3	A3	53	75.9781	657540	23291.5	kif2c
3	A3	54	76.2854	650018	23271	kif2c
3	A3	55	76.5926	643214	23281	kif2c
3	A3	56	76.8999	635759	23317.8	kif2c
3	A3	57	77.2072	628087	23407.5	kif2c
3	A3	58	77.5144	620123	23644.1	kif2c
3	A3	59	77.8217	613177	24230.9	kif2c
3	A3	60	78.1289	607204	25697.2	kif2c
3	A3	61	78.4362	599474	28630.7	kif2c
3	A3	62	78.7434	592295	33848.8	kif2c
3	A3	63	79.0507	584820	42355.2	kif2c
3	A3	64	79.358	576283	55125	kif2c
3	A3	65	79.6652	564593	72774.8	kif2c
3	A3	66	79.9725	549084	95145.4	kif2c
3	A3	67	80.2797	523619	120948	kif2c
3	A3	68	80.587	479298	147661	kif2c
3	A3	69	80.8943	414210	171824	kif2c
3	A3	70	81.2015	339061	189707	kif2c
3	A3	71	81.5088	263104	198180	kif2c
3	A3	72	81.816	188246	195520	kif2c
3	A3	73	82.1233	122157	181897	kif2c
3	A3	74	82.4305	68831	159383	kif2c
3	A3	75	82.7378	38507.3	131462	kif2c
3	A3	76	83.0451	28748.8	102171	kif2c
3	A3	77	83.3523	24782.8	75127.1	kif2c
3	A3	78	83.6596	22721.7	52750.5	kif2c
3	A3	79	83.9668	19827.2	35938.8	kif2c
3	A3	80	84.2741	14766.7	24274.6	kif2c
3	A3	81	84.5814	7263.98	17548.7	kif2c
3	A3	82	84.8886	348.331	12994.8	kif2c
3	A3	83	85.1959	-965.403	9677.36	kif2c
3	A3	84	85.5031	16.1961	7061.71	kif2c
3	A3	85	85.8104	-969.192	4941.97	kif2c
3	A3	86	86.1176	-1314.75	3275.56	kif2c
3	A3	87	86.4249	-1302.36	2043.38	kif2c
3	A3	88	86.7322	-2283.38	1189.71	kif2c
3	A3	89	87.0394	-1847.13	629.484	kif2c
3	A3	90	87.3467	-2331.48	278.811	kif2c
3	A3	91	87.6539	-1178.56	73.5547	kif2c
3	A3	92	87.9612	-1889.32	-32.3848	kif2c
3	A3	93	88.2684	-2032.32	-77.3438	kif2c
3	A3	94	88.5757	-2592.4	-96.3184	kif2c
3	A3	95	88.883	-2421.21	-115.646	kif2c
3	A3	96	89.1902	-2668.14	-145.162	kif2c
3	A3	97	89.4975	-1944.97	-177.633	kif2c
3	A3	98	89.8047	-2424.72	-198.521	kif2c
3	A3	99	90.112	-2103.13	-199.869	kif2c
3	A3	100	90.4193	-2353.92	-188.238	kif2c
3	A3	101	90.7265	-3371.42	-180.957	kif2c
3	A3	102	91.0338	-2903.41	-193.789	kif2c
3	A3	103	91.341	-2483.39	-229.543	kif2c
3	A3	104	91.6483	-2794.32	-275.969	kif2c
3	A3	105	91.9555	-2407.68	-313.859	kif2c
3	A3	106	92.2628	-2797.16	-328.734	kif2c
3	A3	107	92.5701	-2514.25	-318.035	kif2c
3	A3	108	92.8773	-3099.87	-290.432	kif2c
3	A3	109	93.1846	-2454.15	-259.652	kif2c
3	A3	110	93.4918	-3172.47	-237.678	kif2c
3	A3	111	93.7991	-3086.83	-230.547	kif2c
3	A3	112	94.1064	-2909.03	-237.551	kif2c
3	A3	113	94.4136	-3029.42	-253.076	kif2c
3	A3	114	94.7209	-2929.29	-269.904	kif2c
4	A4	1	60.0007	1.01945e+06	20202	GAPDH
4	A4	2	60.308	1.01528e+06	20666.3	GAPDH
4	A4	3	60.6152	1.01043e+06	21192.8	GAPDH
4	A4	4	60.9225	1.00556e+06	21755.8	GAPDH
4	A4	5	61.2297	997925	22322.4	GAPDH
4	A4	6	61.537	991120	22862.1	GAPDH
4	A4	7	61.8442	984492	23353.3	GAPDH
4	A4	8	62.1515	976331	23807	GAPDH
4	A4	9	62.4588	968885	24213.2	GAPDH
4	A4	10	62.766	960792	24554.1	GAPDH
4	A4	11	63.0733	954256	24839.1	GAPDH
4	A4	12	63.3805	944921	25081.2	GAPDH
4	A4	13	63.6878	937402	25293.6	GAPDH
4	A4	14	63.9951	928856	25485.1	GAPDH
4	A4	15	64.3023	922637	25656	GAPDH
4	A4	16	64.6096	912328	25799	GAPDH
4	A4	17	64.9168	904638	25903.4	GAPDH
4	A4	18	65.2241	896334	25962.7	GAPDH
4	A4	19	65.5313	888215	25979.3	GAPDH
4	A4	20	65.8386	879419	25964.1	GAPDH
4	A4	21	66.1459	871390	25932.1	GAPDH
4	A4	22	66.4531	863864	25895.2	GAPDH
4	A4	23	66.7604	855361	25857.8	GAPDH
4	A4	24	67.0676	847113	25815.3	GAPDH
4	A4	25	67.3749	838992	25758.4	GAPDH
4	A4	26	67.6822	830935	25681.2	GAPDH
4	A4	27	67.9894	822271	25585.8	GAPDH
4	A4	28	68.2967	814867	25483	GAPDH
4	A4	29	68.6039	806550	25385.7	GAPDH
4	A4	30	68.9112	798918	25301	GAPDH
4	A4	31	69.2184	791679	25225.9	GAPDH
4	A4	32	69.5257	783293	25151.1	GAPDH
4	A4	33	69.833	773830	25070.2	GAPDH
4	A4	34	70.1402	767376	24985.5	GAPDH
4	A4	35	70.4475	758651	24906.1	GAPDH
4	A4	36	70.7547	751688	24838.3	GAPDH
4	A4	37	71.062	743553	24777.9	GAPDH
4	A4	38	71.3692	735141	24709.9	GAPDH
4	A4	39	71.6765	727354	24617.5	GAPDH
4	A4	40	71.9838	719382	24491.7	GAPDH
4	A4	41	72.291	711884	24336.4	GAPDH
4	A4	42	72.5983	703493	24163.7	GAPDH
4	A4	43	72.9055	696749	23988.6	GAPDH
4	A4	44	73.2128	689240	23818.6	GAPDH
4	A4	45	73.5201	680963	23652.1	GAPDH
4	A4	46	73.8273	674553	23487.7	GAPDH
4	A4	47	74.1346	666540	23317.9	GAPDH
4	A4	48	74.4418	659471	23133.6	GAPDH
4	A4	49	74.7491	652134	22947.6	GAPDH
4	A4	50	75.0564	645052	22783.9	GAPDH
4	A4	51	75.3636	639017	22668.5	GAPDH
4	A4	52	75.6709	632280	22616.8	GAPDH
4	A4	53	75.9781	625547	22623.2	GAPDH
4	A4	54	76.2854	618147	22661.2	GAPDH
4	A4	55	76.5926	611427	22693.9	GAPDH
4	A4	56	76.8999	604116	22690.3	GAPDH
4	A4	57	77.2072	596845	22640.3	GAPDH
4	A4	58	77.5144	589677	22562.1	GAPDH
4	A4	59	77.8217	582759	22502.7	GAPDH
4	A4	60	78.1289	576611	22536.2	GAPDH
4	A4	61	78.4362	569840	22772.6	GAPDH
4	A4	62	78.7434	562680	23390	GAPDH
4	A4	63	79.0507	555700	24811.4	GAPDH
4	A4	64	79.358	549275	27571.5	GAPDH
4	A4	65	79.6652	540810	32497.3	GAPDH
4	A4	66	79.9725	533707	40676.6	GAPDH
4	A4	67	80.2797	525952	53226.8	GAPDH
4	A4	68	80.587	515500	70881.1	GAPDH
4	A4	69	80.8943	500915	93457.2	GAPDH
4	A4	70	81.2015	478306	119419	GAPDH
4	A4	71	81.5088	432584	145805	GAPDH
4	A4	72	81.816	354306	168683	GAPDH
4	A4	73	82.1233	273800	184075	GAPDH
4	A4	74	82.4305	197006	189025	GAPDH
4	A4	75	82.7378	131209	182414	GAPDH
4	A4	76	83.0451	73747.7	165231	GAPDH
4	A4	77	83.3523	29075.2	140259	GAPDH
4	A4	78	83.6596	6178.08	111311	GAPDH
4	A4	79	83.9668	1999.05	82300.7	GAPDH
4	A4	80	84.2741	1125.19	56403.9	GAPDH
4	A4	81	84.5814	310.412	35543.3	GAPDH
4	A4	82	84.8886	271.946	20601.1	GAPDH
4	A4	83	85.1959	307.58	11417.4	GAPDH
4	A4	84	85.5031	170.254	5867.5	GAPDH
4	A4	85	85.8104	431.886	2825.98	GAPDH
4	A4	86	86.1176	-389.42	1321.37	GAPDH
4	A4	87	86.4249	-356.772	652.877	GAPDH
4	A4	88	86.7322	-320.724	384.154	GAPDH
4	A4	89	87.0394	-610.866	278.486	GAPDH
4	A4	90	87.3467	-1225.28	225.391	GAPDH
4	A4	91	87.6539	-478.531	182.83	GAPDH
4	A4	92	87.9612	-1334.27	139.996	GAPDH
4	A4	93	88.2684	-727.647	96.9727	GAPDH
4	A4	94	88.5757	-1326.08	56.3672	GAPDH
4	A4	95	88.883	-1534.83	22.2188	GAPDH
4	A4	96	89.1902	-1513.64	1.06055	GAPDH
4	A4	97	89.4975	-835.287	0.283203	GAPDH
4	A4	98	89.8047	-1045.19	22.2988	GAPDH
4	A4	99	90.112	-1575.9	58.5762	GAPDH
4	A4	100	90.4193	-2038.46	90.0938	GAPDH
4	A4	101	90.7265	-2220.12	96.4961	GAPDH
4	A4	102	91.0338	-2137.36	68.3438	GAPDH
4	A4	103	91.341	-1704.48	13.1582	GAPDH
4	A4	104	91.6483	-1963.78	-49.5039	GAPDH
4	A4	105	91.9555	-1964.64	-99.9707	GAPDH
4	A4	106	92.2628	-1931.31	-128.469	GAPDH
4	A4	107	92.5701	-2204.04	-137.301	GAPDH
4	A4	108	92.8773	-2347.46	-135.957	GAPDH
4	A4	109	93.1846	-1660.41	-134.402	GAPDH
4	A4	110	93.4918	-2444.14	-138.965	GAPDH
4	A4	111	93.7991	-2566.21	-151.639	GAPDH
4	A4	112	94.1064	-1701.89	-171.203	GAPDH
4	A4	113	94.4136	-2284.63	-194.764	GAPDH
4	A4	114	94.7209	-2455.88	-219.215	GAPDH
5	A5	1	60.0007	1.01001e+06	19176.9	GAPDH
5	A5	2	60.308	1.0059e+06	19649.6	GAPDH
5	A5	3	60.6152	1001429	20180.1	GAPDH
5	A5	4	60.9225	996411	20755.4	GAPDH
5	A5	5	61.2297	989265	21354.7	GAPDH
5	A5	6	61.537	983135	21954.8	GAPDH
5	A5	7	61.8442	976727	22534.3	GAPDH
5	A5	8	62.1515	967792	23111.4	GAPDH
5	A5	9	62.4588	961384	23651.7	GAPDH
5	A5	10	62.766	953944	24122.8	GAPDH
5	A5	11	63.0733	946118	24516.6	GAPDH
5	A5	12	63.3805	937178	24829	GAPDH
5	A5	13	63.6878	929805	25060.9	GAPDH
5	A5	14	63.9951	921745	25216.3	GAPDH
5	A5	15	64.3023	913897	25302	GAPDH
5	A5	16	64.6096	904492	25329.4	GAPDH
5	A5	17	64.9168	896787	25314	GAPDH
5	A5	18	65.2241	888658	25275.1	GAPDH
5	A5	19	65.5313	880547	25230.7	GAPDH
5	A5	20	65.8386	872475	25191.3	GAPDH
5	A5	21	66.1459	864862	25156.2	GAPDH
5	A5	22	66.4531	856272	25115.2	GAPDH
5	A5	23	66.7604	848958	25054.2	GAPDH
5	A5	24	67.0676	840419	24963.8	GAPDH
5	A5	25	67.3749	831855	24846.8	GAPDH
5	A5	26	67.6822	824399	24718.1	GAPDH
5	A5	27	67.9894	816663	24601.7	GAPDH
5	A5	28	68.2967	809112	24517.6	GAPDH
5	A5	29	68.6039	800914	24474.5	GAPDH
5	A5	30	68.9112	794255	24462.6	GAPDH
5	A5	31	69.2184	785976	24457.8	GAPDH
5	A5	32	69.5257	777556	24429.9	GAPDH
5	A5	33	69.833	769990	24355.1	GAPDH
5	A5	34	70.1402	762109	24225.5	GAPDH
5	A5	35	70.4475	753588	24051.9	GAPDH
5	A5	36	70.7547	746035	23859	GAPDH
5	A5	37	71.062	739537	23676.2	GAPDH
5	A5	38	71.3692	731201	23525.6	GAPDH
5	A5	39	71.6765	723698	23416.8	GAPDH
5	A5	40	71.9838	716298	23345	GAPDH
5	A5	41	72.291	708876	23294.1	GAPDH
5	A5	42	72.5983	701277	23242.4	GAPDH
5	A5	43	72.9055	694049	23169.3	GAPDH
5	A5	44	73.2128	685673	23062.3	GAPDH
5	A5	45	73.5201	678284	22919.7	GAPDH
5	A5	46	73.8273	672768	22750.5	GAPDH
5	A5	47	74.1346	663980	22584.2	GAPDH
5	A5	48	74.4418	657355	22421.1	GAPDH
5	A5	49	74.7491	650656	22271.3	GAPDH
5	A5	50	75.0564	643627	22143.9	GAPDH
5	A5	51	75.3636	637059	22045.5	GAPDH
5	A5	52	75.6709	629955	21978.2	GAPDH
5	A5	53	75.9781	624316	21937.1	GAPDH
5	A5	54	76.2854	616663	21911.2	GAPDH
5	A5	55	76.5926	609783	21886.5	GAPDH
5	A5	56	76.8999	603028	21851.8	GAPDH
5	A5	57	77.2072	597020	21804.3	GAPDH
5	A5	58	77.5144	589195	21757.8	GAPDH
5	A5	59	77.8217	581820	21751.1	GAPDH
5	A5	60	78.1289	576503	21863.3	GAPDH
5	A5	61	78.4362	569478	22239.1	GAPDH
5	A5	62	78.7434	562695	23174.4	GAPDH
5	A5	63	79.0507	556277	25202.1	GAPDH
5	A5	64	79.358	548679	28993.9	GAPDH
5	A5	65	79.6652	542642	35533	GAPDH
5	A5	66	79.9725	533788	45936.1	GAPDH
5	A5	67	80.2797	525562	61135.8	GAPDH
5	A5	68	80.587	513736	81395.9	GAPDH
5	A5	69	80.8943	495381	105814	GAPDH
5	A5	70	81.2015	461147	132068	GAPDH
5	A5	71	81.5088	397874	156629	GAPDH
5	A5	72	81.816	312162	175492	GAPDH
5	A5	73	82.1233	235294	185210	GAPDH
5	A5	74	82.4305	163032	183835	GAPDH
5	A5	75	82.7378	101598	171436	GAPDH
5	A5	76	83.0451	50000.7	150025	GAPDH
5	A5	77	83.3523	16695.1	122984	GAPDH
5	A5	78	83.6596	5145.28	94199.4	GAPDH
5	A5	79	83.9668	3643.51	67172.4	GAPDH
5	A5	80	84.2741	3506.27	44364.1	GAPDH
5	A5	81	84.5814	2139.45	26911.8	GAPDH
5	A5	82	84.8886	1988.39	15498.9	GAPDH
5	A5	83	85.1959	1919.58	8485.38	GAPDH
5	A5	84	85.5031	1702.3	4399.74	GAPDH
5	A5	85	85.8104	1326.24	2215.57	GAPDH
5	A5	86	86.1176	1246.95	1142.4	GAPDH
5	A5	87	86.4249	1879.36	659.332	GAPDH
5	A5	88	86.7322	1062.87	462.248	GAPDH
5	A5	89	87.0394	1343.27	388.047	GAPDH
5	A5	90	87.3467	400.34	353.771	GAPDH
5	A5	91	87.6539	895.758	320.523	GAPDH
5	A5	92	87.9612	660.404	275.432	GAPDH
5	A5	93	88.2684	619.969	221.449	GAPDH
5	A5	94	88.5757	706.065	169.309	GAPDH
5	A5	95	88.883	427.7	131.01	GAPDH
5	A5	96	89.1902	760.361	115.725	GAPDH
5	A5	97	89.4975	483.907	127.775	GAPDH
5	A5	98	89.8047	657.889	165.467	GAPDH
5	A5	99	90.112	539.28	220.521	GAPDH
5	A5	100	90.4193	-59.8563	279.107	GAPDH
5	A5	101	90.7265	176.138	325.357	GAPDH
5	A5	102	91.0338	-472.36	346.547	GAPDH
5	A5	103	91.341	-225.274	337.365	GAPDH
5	A5	104	91.6483	-307.741	301.039	GAPDH
5	A5	105	91.9555	-369.5	246.941	GAPDH
5	A5	106	92.2628	-835.212	186.248	GAPDH
5	A5	107	92.5701	-189.096	127.768	GAPDH
5	A5	108	92.8773	-187.052	75.4375	GAPDH
5	A5	109	93.1846	-791.559	28.3867	GAPDH
5	A5	110	93.4918	-709.854	-16.5703	GAPDH
5	A5	111	93.7991	-503.397	-61.4102	GAPDH
5	A5	112	94.1064	129.958	-105.01	GAPDH
5	A5	113	94.4136	-538.413	-144.373	GAPDH
5	A5	114	94.7209	-460.349	-177.832	GAPDH
6	A6	1	60.0007	1.08784e+06	20995.7	GAPDH
6	A6	2	60.308	1.08203e+06	21459.3	GAPDH
6	A6	3	60.6152	1.07724e+06	21987.5	GAPDH
6	A6	4	60.9225	1.07272e+06	22567	GAPDH
6	A6	5	61.2297	1.06545e+06	23175.2	GAPDH
6	A6	6	61.537	1.05781e+06	23786.3	GAPDH
6	A6	7	61.8442	1.05008e+06	24377.1	GAPDH
6	A6	8	62.1515	1.04237e+06	24932.2	GAPDH
6	A6	9	62.4588	1.03512e+06	25463.1	GAPDH
6	A6	10	62.766	1.02641e+06	25912.1	GAPDH
6	A6	11	63.0733	1.01818e+06	26265.7	GAPDH
6	A6	12	63.3805	1.00915e+06	26522.3	GAPDH
6	A6	13	63.6878	1.0008e+06	26694.3	GAPDH
6	A6	14	63.9951	992247	26806.4	GAPDH
6	A6	15	64.3023	983956	26886.3	GAPDH
6	A6	16	64.6096	974529	26958.5	GAPDH
6	A6	17	64.9168	966726	27039.3	GAPDH
6	A6	18	65.2241	957374	27132.7	GAPDH
6	A6	19	65.5313	949238	27229.3	GAPDH
6	A6	20	65.8386	940119	27306.2	GAPDH
6	A6	21	66.1459	932199	27332	GAPDH
6	A6	22	66.4531	922947	27278.2	GAPDH
6	A6	23	66.7604	914013	27132.8	GAPDH
6	A6	24	67.0676	904371	26911.8	GAPDH
6	A6	25	67.3749	896644	26657.9	GAPDH
6	A6	26	67.6822	888505	26427	GAPDH
6	A6	27	67.9894	879926	26268.7	GAPDH
6	A6	28	68.2967	872413	26207.2	GAPDH
6	A6	29	68.6039	864242	26234.5	GAPDH
6	A6	30	68.9112	855784	26313.4	GAPDH
6	A6	31	69.2184	848112	26393.4	GAPDH
6	A6	32	69.5257	838540	26430.4	GAPDH
6	A6	33	69.833	829433	26402	GAPDH
6	A6	34	70.1402	821690	26313	GAPDH
6	A6	35	70.4475	813352	26188	GAPDH
6	A6	36	70.7547	804690	26055.5	GAPDH
6	A6	37	71.062	796882	25934.5	GAPDH
6	A6	38	71.3692	788575	25828.7	GAPDH
6	A6	39	71.6765	779737	25728.3	GAPDH
6	A6	40	71.9838	772196	25618.2	GAPDH
6	A6	41	72.291	763551	25487.3	GAPDH
6	A6	42	72.5983	754799	25335.1	GAPDH
6	A6	43	72.9055	747520	25172.3	GAPDH
6	A6	44	73.2128	739357	25015.4	GAPDH
6	A6	45	73.5201	732067	24878.4	GAPDH
6	A6	46	73.8273	723686	24773.2	GAPDH
6	A6	47	74.1346	716103	24684.1	GAPDH
6	A6	48	74.4418	708487	24595.8	GAPDH
6	A6	49	74.7491	700969	24493.3	GAPDH
6	A6	50	75.0564	693100	24369.3	GAPDH
6	A6	51	75.3636	684928	24227.8	GAPDH
6	A6	52	75.6709	678720	24083.4	GAPDH
6	A6	53	75.9781	671408	23955	GAPDH
6	A6	54	76.2854	664159	23857.2	GAPDH
6	A6	55	76.5926	656466	23796.1	GAPDH
6	A6	56	76.8999	649453	23769.8	GAPDH
6	A6	57	77.2072	642359	23773.3	GAPDH
6	A6	58	77.5144	634199	23807.3	GAPDH
6	A6	59	77.8217	627385	23890.8	GAPDH
6	A6	60	78.1289	620088	24081.4	GAPDH
6	A6	61	78.4362	612070	24512.5	GAPDH
6	A6	62	78.7434	604643	25493.5	GAPDH
6	A6	63	79.0507	598171	27548.4	GAPDH
6	A6	64	79.358	590186	31434.7	GAPDH
6	A6	65	79.6652	582293	38227.3	GAPDH
6	A6	66	79.9725	574301	49156	GAPDH
6	A6	67	80.2797	565021	65267.6	GAPDH
6	A6	68	80.587	551905	86904.5	GAPDH
6	A6	69	80.8943	533529	113154	GAPDH
6	A6	70	81.2015	497968	141551	GAPDH
6	A6	71	81.5088	429938	168278	GAPDH
6	A6	72	81.816	337464	188954	GAPDH
6	A6	73	82.1233	252390	199763	GAPDH
6	A6	74	82.4305	173609	198514	GAPDH
6	A6	75	82.7378	106583	185233	GAPDH
6	A6	76	83.0451	51909.2	162098	GAPDH
6	A6	77	83.3523	15465.7	132802	GAPDH
6	A6	78	83.6596	3209.03	101589	GAPDH
6	A6	79	83.9668	1406.48	72284.5	GAPDH
6	A6	80	84.2741	1300.68	47573.9	GAPDH
6	A6	81	84.5814	798.294	28702.8	GAPDH
6	A6	82	84.8886	780.19	16285.4	GAPDH
6	A6	83	85.1959	963.857	8629.23	GAPDH
6	A6	84	85.5031	648.337	4245.29	GAPDH
6	A6	85	85.8104	427.539	1974.79	GAPDH
6	A6	86	86.1176	369.54	918.324	GAPDH
6	A6	87	86.4249	-430.115	483.645	GAPDH
6	A6	88	86.7322	490.117	334.172	GAPDH
6	A6	89	87.0394	-640.518	303.352	GAPDH
6	A6	90	87.3467	-284.815	316.451	GAPDH
6	A6	91	87.6539	-162.949	337.236	GAPDH
6	A6	92	87.9612	-1369.15	341.418	GAPDH
6	A6	93	88.2684	-1345.19	310.783	GAPDH
6	A6	94	88.5757	-1574.29	238.119	GAPDH
6	A6	95	88.883	-1636.34	132.371	GAPDH
6	A6	96	89.1902	-1522.37	16.7812	GAPDH
6	A6	97	89.4975	-979.524	-80.9902	GAPDH
6	A6	98	89.8047	-1396.03	-141.67	GAPDH
6	A6	99	90.112	-1467.29	-162.508	GAPDH
6	A6	100	90.4193	-1376.67	-155.904	GAPDH
6	A6	101	90.7265	-2112.78	-139.822	GAPDH
6	A6	102	91.0338	-1776.42	-126.734	GAPDH
6	A6	103	91.341	-1401.11	-118.65	GAPDH
6	A6	104	91.6483	-1783.68	-111.15	GAPDH
6	A6	105	91.9555	-1355.85	-102.113	GAPDH
6	A6	106	92.2628	-2503.64	-97.2383	GAPDH
6	A6	107	92.5701	-2231.76	-107.533	GAPDH
6	A6	108	92.8773	-2138.33	-140.984	GAPDH
6	A6	109	93.1846	-1860.76	-195.68	GAPDH
6	A6	110	93.4918	-2281.66	-259.855	GAPDH
6	A6	111	93.7991	-1698.92	-318.275	GAPDH
6	A6	112	94.1064	-2127.83	-359.834	GAPDH
6	A6	113	94.4136	-1999.44	-381.494	GAPDH
6	A6	114	94.7209	-1548.53	-387.539	GAPDH
13	B1	1	60.0007	1.04754e+06	22403.6	kif2c
13	B1	2	60.308	1.04257e+06	22798.2	kif2c
13	B1	3	60.6152	1.03686e+06	23241.6	kif2c
13	B1	4	60.9225	1.03156e+06	23716	kif2c
13	B1	5	61.2297	1.02346e+06	24213.4	kif2c
13	B1	6	61.537	1.01606e+06	24801.2	kif2c
13	B1	7	61.8442	1.009e+06	25365.8	kif2c
13	B1	8	62.1515	1.00099e+06	25891.7	kif2c
13	B1	9	62.4588	991944	26366.1	kif2c
13	B1	10	62.766	983795	26777.2	kif2c
13	B1	11	63.0733	976426	27114	kif2c
13	B1	12	63.3805	967362	27366.2	kif2c
13	B1	13	63.6878	958201	27523.4	kif2c
13	B1	14	63.9951	949645	27576.4	kif2c
13	B1	15	64.3023	941153	27519.2	kif2c
13	B1	16	64.6096	932998	27355.8	kif2c
13	B1	17	64.9168	922940	27108.8	kif2c
13	B1	18	65.2241	914045	26823	kif2c
13	B1	19	65.5313	906283	26557.2	kif2c
13	B1	20	65.8386	898883	26364.2	kif2c
13	B1	21	66.1459	890684	26270.5	kif2c
13	B1	22	66.4531	881951	26265.5	kif2c
13	B1	23	66.7604	874948	26309.1	kif2c
13	B1	24	67.0676	865890	26350.4	kif2c
13	B1	25	67.3749	856607	26348.8	kif2c
13	B1	26	67.6822	849336	26285.7	kif2c
13	B1	27	67.9894	840141	26165.9	kif2c
13	B1	28	68.2967	833693	26008.4	kif2c
13	B1	29	68.6039	823759	25837.1	kif2c
13	B1	30	68.9112	816399	25671.9	kif2c
13	B1	31	69.2184	809350	25523.5	kif2c
13	B1	32	69.5257	800748	25391.1	kif2c
13	B1	33	69.833	791972	25264.9	kif2c
13	B1	34	70.1402	785004	25131.5	kif2c
13	B1	35	70.4475	776743	24982.7	kif2c
13	B1	36	70.7547	767974	24820.4	kif2c
13	B1	37	71.062	760765	24658.4	kif2c
13	B1	38	71.3692	752900	24515.2	kif2c
13	B1	39	71.6765	745436	24403.7	kif2c
13	B1	40	71.9838	737353	24321.5	kif2c
13	B1	41	72.291	730158	24249.5	kif2c
13	B1	42	72.5983	721921	24161.9	kif2c
13	B1	43	72.9055	713539	24062.2	kif2c
13	B1	44	73.2128	706190	23941.2	kif2c
13	B1	45	73.5201	699291	23815.6	kif2c
13	B1	46	73.8273	691754	23708.3	kif2c
13	B1	47	74.1346	684428	23632.1	kif2c
13	B1	48	74.4418	677339	23582.6	kif2c
13	B1	49	74.7491	670103	23540	kif2c
13	B1	50	75.0564	661874	23480.6	kif2c
13	B1	51	75.3636	654887	23388.1	kif2c
13	B1	52	75.6709	648567	23260.2	kif2c
13	B1	53	75.9781	641279	23109.9	kif2c
13	B1	54	76.2854	633579	22964.1	kif2c
13	B1	55	76.5926	627574	22863.7	kif2c
13	B1	56	76.8999	619824	22871	kif2c
13	B1	57	77.2072	613677	23082.2	kif2c
13	B1	58	77.5144	607160	23657.5	kif2c
13	B1	59	77.8217	599434	25024.9	kif2c
13	B1	60	78.1289	592286	27812.9	kif2c
13	B1	61	78.4362	585320	32711.3	kif2c
13	B1	62	78.7434	577464	40763.5	kif2c
13	B1	63	79.0507	569635	53095	kif2c
13	B1	64	79.358	559629	70576.9	kif2c
13	B1	65	79.6652	546358	93360.6	kif2c
13	B1	66	79.9725	524163	120436	kif2c
13	B1	67	80.2797	487869	149430	kif2c
13	B1	68	80.587	425069	176811	kif2c
13	B1	69	80.8943	349436	198528	kif2c
13	B1	70	81.2015	273517	210916	kif2c
13	B1	71	81.5088	199658	211595	kif2c
13	B1	72	81.816	126799	200085	kif2c
13	B1	73	82.1233	67642	177976	kif2c
13	B1	74	82.4305	27640.7	148582	kif2c
13	B1	75	82.7378	14229.7	116155	kif2c
13	B1	76	83.0451	10090.6	84874.8	kif2c
13	B1	77	83.3523	9303.9	57921.3	kif2c
13	B1	78	83.6596	7863.96	36937.1	kif2c
13	B1	79	83.9668	5415.59	22414.1	kif2c
13	B1	80	84.2741	1993.72	14383.6	kif2c
13	B1	81	84.5814	-1901.22	9350.83	kif2c
13	B1	82	84.8886	-2497.59	6216.82	kif2c
13	B1	83	85.1959	-2725.53	4188.22	kif2c
13	B1	84	85.5031	-2443.12	2801.72	kif2c
13	B1	85	85.8104	-3243.86	1828.63	kif2c
13	B1	86	86.1176	-3379.46	1158.42	kif2c
13	B1	87	86.4249	-3130.75	719.996	kif2c
13	B1	88	86.7322	-3211.71	449.922	kif2c
13	B1	89	87.0394	-3708.97	289.92	kif2c
13	B1	90	87.3467	-3971.77	193.172	kif2c
13	B1	91	87.6539	-3529.53	128.283	kif2c
13	B1	92	87.9612	-3884.58	78.209	kif2c
13	B1	93	88.2684	-4037.91	35.7891	kif2c
13	B1	94	88.5757	-3819.51	-1.23438	kif2c
13	B1	95	88.883	-4306.26	-33.4746	kif2c
13	B1	96	89.1902	-3843.76	-60.7383	kif2c
13	B1	97	89.4975	-4351.1	-81.5098	kif2c
13	B1	98	89.8047	-4091.57	-92.8379	kif2c
13	B1	99	90.112	-4143.24	-91.8379	kif2c
13	B1	100	90.4193	-4035.31	-78.5293	kif2c
13	B1	101	90.7265	-4399.61	-58.2676	kif2c
13	B1	102	91.0338	-4245.22	-41.2617	kif2c
13	B1	103	91.341	-4773.44	-37.916	kif2c
13	B1	104	91.6483	-4873.37	-51.9023	kif2c
13	B1	105	91.9555	-4553.27	-75.8105	kif2c
13	B1	106	92.2628	-4444.08	-94.0625	kif2c
13	B1	107	92.5701	-3958	-92.8359	kif2c
13	B1	108	92.8773	-4544.6	-70.4531	kif2c
13	B1	109	93.1846	-5321.14	-39.6602	kif2c
13	B1	110	93.4918	-5295.19	-19.0762	kif2c
13	B1	111	93.7991	-4777.31	-20.0605	kif2c
13	B1	112	94.1064	-4738.16	-39.4902	kif2c
13	B1	113	94.4136	-4956.53	-63.5801	kif2c
13	B1	114	94.7209	-4962.93	-78.4746	kif2c
14	B2	1	60.0007	1.12569e+06	24168.8	kif2c
14	B2	2	60.308	1.12148e+06	24568.8	kif2c
14	B2	3	60.6152	1.1151e+06	25036.4	kif2c
14	B2	4	60.9225	1.10878e+06	25548.6	kif2c
14	B2	5	61.2297	1.10059e+06	26093.1	kif2c
14	B2	6	61.537	1.09237e+06	26704.6	kif2c
14	B2	7	61.8442	1.08446e+06	27267.7	kif2c
14	B2	8	62.1515	1.07575e+06	27755.2	kif2c
14	B2	9	62.4588	1.0662e+06	28150.9	kif2c
14	B2	10	62.766	1057781	28451.4	kif2c
14	B2	11	63.0733	1.04808e+06	28668.8	kif2c
14	B2	12	63.3805	1.03951e+06	28823	kif2c
14	B2	13	63.6878	1.02965e+06	28932.1	kif2c
14	B2	14	63.9951	1.02193e+06	29005.1	kif2c
14	B2	15	64.3023	1.01185e+06	29042.7	kif2c
14	B2	16	64.6096	1.00222e+06	29044.3	kif2c
14	B2	17	64.9168	992330	29016	kif2c
14	B2	18	65.2241	984450	28971	kif2c
14	B2	19	65.5313	974179	28923	kif2c
14	B2	20	65.8386	965680	28879	kif2c
14	B2	21	66.1459	957102	28836.3	kif2c
14	B2	22	66.4531	946489	28784.2	kif2c
14	B2	23	66.7604	938702	28711.4	kif2c
14	B2	24	67.0676	929834	28612	kif2c
14	B2	25	67.3749	918945	28490.2	kif2c
14	B2	26	67.6822	911114	28357.8	kif2c
14	B2	27	67.9894	902139	28229.3	kif2c
14	B2	28	68.2967	893963	28110.5	kif2c
14	B2	29	68.6039	884502	27996.7	kif2c
14	B2	30	68.9112	875531	27874.2	kif2c
14	B2	31	69.2184	867507	27730	kif2c
14	B2	32	69.5257	858001	27560.5	kif2c
14	B2	33	69.833	848842	27374.9	kif2c
14	B2	34	70.1402	840605	27190.7	kif2c
14	B2	35	70.4475	832038	27023.9	kif2c
14	B2	36	70.7547	824112	26880.5	kif2c
14	B2	37	71.062	814508	26755.1	kif2c
14	B2	38	71.3692	805914	26635.8	kif2c
14	B2	39	71.6765	797775	26511	kif2c
14	B2	40	71.9838	789585	26373.7	kif2c
14	B2	41	72.291	780333	26223.3	kif2c
14	B2	42	72.5983	771911	26063.2	kif2c
14	B2	43	72.9055	764449	25914.2	kif2c
14	B2	44	73.2128	755468	25781.1	kif2c
14	B2	45	73.5201	747771	25654.7	kif2c
14	B2	46	73.8273	739653	25533.4	kif2c
14	B2	47	74.1346	731633	25409.7	kif2c
14	B2	48	74.4418	723563	25275.3	kif2c
14	B2	49	74.7491	715707	25125.9	kif2c
14	B2	50	75.0564	707707	24965	kif2c
14	B2	51	75.3636	700284	24803.1	kif2c
14	B2	52	75.6709	693079	24653.6	kif2c
14	B2	53	75.9781	685998	24528.7	kif2c
14	B2	54	76.2854	677997	24441.4	kif2c
14	B2	55	76.5926	670006	24414.9	kif2c
14	B2	56	76.8999	663256	24497.6	kif2c
14	B2	57	77.2072	655527	24785.2	kif2c
14	B2	58	77.5144	648459	25452.4	kif2c
14	B2	59	77.8217	640691	26956.1	kif2c
14	B2	60	78.1289	633291	29957.6	kif2c
14	B2	61	78.4362	624002	35213.5	kif2c
14	B2	62	78.7434	616718	43820	kif2c
14	B2	63	79.0507	608710	56921.4	kif2c
14	B2	64	79.358	597301	75339	kif2c
14	B2	65	79.6652	582489	99090.8	kif2c
14	B2	66	79.9725	557774	126970	kif2c
14	B2	67	80.2797	515191	156402	kif2c
14	B2	68	80.587	445933	183721	kif2c
14	B2	69	80.8943	365546	204861	kif2c
14	B2	70	81.2015	285940	216264	kif2c
14	B2	71	81.5088	208512	215728	kif2c
14	B2	72	81.816	131453	202966	kif2c
14	B2	73	82.1233	70022.1	179723	kif2c
14	B2	74	82.4305	28963.3	149406	kif2c
14	B2	75	82.7378	15774.4	116300	kif2c
14	B2	76	83.0451	12043.8	84569.8	kif2c
14	B2	77	83.3523	11254.5	57353.4	kif2c
14	B2	78	83.6596	9384.14	36247	kif2c
14	B2	79	83.9668	8191.61	22064.5	kif2c
14	B2	80	84.2741	4656.48	13869.1	kif2c
14	B2	81	84.5814	1664.64	8809.02	kif2c
14	B2	82	84.8886	1170.94	5740.64	kif2c
14	B2	83	85.1959	524.698	3828.94	kif2c
14	B2	84	85.5031	1082.14	2576.74	kif2c
14	B2	85	85.8104	707.546	1732.71	kif2c
14	B2	86	86.1176	190.892	1175.19	kif2c
14	B2	87	86.4249	541.981	830.152	kif2c
14	B2	88	86.7322	165.445	635.102	kif2c
14	B2	89	87.0394	64.2927	533.447	kif2c
14	B2	90	87.3467	-58.0758	479.742	kif2c
14	B2	91	87.6539	-752.248	444.189	kif2c
14	B2	92	87.9612	-294.404	412.709	kif2c
14	B2	93	88.2684	-452.336	382.777	kif2c
14	B2	94	88.5757	-765.56	356.854	kif2c
14	B2	95	88.883	-640.591	336.258	kif2c
14	B2	96	89.1902	-1119.31	318.074	kif2c
14	B2	97	89.4975	-836.724	295.992	kif2c
14	B2	98	89.8047	-1142.48	263.902	kif2c
14	B2	99	90.112	-1568.87	219.764	kif2c
14	B2	100	90.4193	-1121.19	167.457	kif2c
14	B2	101	90.7265	-1059.91	115.383	kif2c
14	B2	102	91.0338	-1181.97	72.373	kif2c
14	B2	103	91.341	-1169.29	43.3145	kif2c
14	B2	104	91.6483	-1394.43	27.2812	kif2c
14	B2	105	91.9555	-1182.15	19.1406	kif2c
14	B2	106	92.2628	-1318	13.041	kif2c
14	B2	107	92.5701	-1390.51	5.11133	kif2c
14	B2	108	92.8773	-968.822	-5.97852	kif2c
14	B2	109	93.1846	-1571.88	-19.7969	kif2c
14	B2	110	93.4918	-1421.81	-34.957	kif2c
14	B2	111	93.7991	-1088.05	-49.582	kif2c
14	B2	112	94.1064	-1001.41	-62.0391	kif2c
14	B2	113	94.4136	-1417.17	-72.0586	kif2c
14	B2	114	94.7209	-1465.51	-81.2812	kif2c
15	B3	1	60.0007	1.11227e+06	23374.4	kif2c
15	B3	2	60.308	1.10702e+06	23800.5	kif2c
15	B3	3	60.6152	1.10057e+06	24276	kif2c
15	B3	4	60.9225	1094992	24771	kif2c
15	B3	5	61.2297	1.0873e+06	25314.4	kif2c
15	B3	6	61.537	1.07872e+06	25868.5	kif2c
15	B3	7	61.8442	1070397	26368.7	kif2c
15	B3	8	62.1515	1062679	26811.6	kif2c
15	B3	9	62.4588	1.05406e+06	27198.5	kif2c
15	B3	10	62.766	1.04499e+06	27532.6	kif2c
15	B3	11	63.0733	1.0363e+06	27816.9	kif2c
15	B3	12	63.3805	1.02803e+06	28053.9	kif2c
15	B3	13	63.6878	1.01843e+06	28243.7	kif2c
15	B3	14	63.9951	1.00981e+06	28384	kif2c
15	B3	15	64.3023	1.00122e+06	28470.5	kif2c
15	B3	16	64.6096	990878	28502.5	kif2c
15	B3	17	64.9168	982350	28484.4	kif2c
15	B3	18	65.2241	972921	28425.6	kif2c
15	B3	19	65.5313	964768	28339.2	kif2c
15	B3	20	65.8386	954752	28237.5	kif2c
15	B3	21	66.1459	946388	28130.3	kif2c
15	B3	22	66.4531	937785	28023.4	kif2c
15	B3	23	66.7604	928819	27920.7	kif2c
15	B3	24	67.0676	920151	27825.4	kif2c
15	B3	25	67.3749	910593	27741	kif2c
15	B3	26	67.6822	902550	27669	kif2c
15	B3	27	67.9894	893566	27603.1	kif2c
15	B3	28	68.2967	885812	27526.2	kif2c
15	B3	29	68.6039	876561	27413.9	kif2c
15	B3	30	68.9112	867375	27247.5	kif2c
15	B3	31	69.2184	859019	27026.7	kif2c
15	B3	32	69.5257	850482	26773.8	kif2c
15	B3	33	69.833	841309	26525.1	kif2c
15	B3	34	70.1402	834465	26312.6	kif2c
15	B3	35	70.4475	825373	26149.8	kif2c
15	B3	36	70.7547	817156	26026.6	kif2c
15	B3	37	71.062	808337	25916.2	kif2c
15	B3	38	71.3692	800641	25788.1	kif2c
15	B3	39	71.6765	791586	25620.7	kif2c
15	B3	40	71.9838	783701	25408.4	kif2c
15	B3	41	72.291	775092	25161.7	kif2c
15	B3	42	72.5983	767394	24921.8	kif2c
15	B3	43	72.9055	759453	24730.4	kif2c
15	B3	44	73.2128	751636	24579.9	kif2c
15	B3	45	73.5201	744143	24483.2	kif2c
15	B3	46	73.8273	736260	24435.9	kif2c
15	B3	47	74.1346	729411	24416.3	kif2c
15	B3	48	74.4418	720720	24392.1	kif2c
15	B3	49	74.7491	712494	24334.6	kif2c
15	B3	50	75.0564	705553	24230.7	kif2c
15	B3	51	75.3636	697791	24089.7	kif2c
15	B3	52	75.6709	690776	23938.4	kif2c
15	B3	53	75.9781	683370	23809.6	kif2c
15	B3	54	76.2854	676210	23728.8	kif2c
15	B3	55	76.5926	669934	23710.7	kif2c
15	B3	56	76.8999	661495	23768.6	kif2c
15	B3	57	77.2072	654079	23942.6	kif2c
15	B3	58	77.5144	647090	24343.1	kif2c
15	B3	59	77.8217	638723	25255.7	kif2c
15	B3	60	78.1289	632039	27400.3	kif2c
15	B3	61	78.4362	624507	31412.7	kif2c
15	B3	62	78.7434	617586	38330.1	kif2c
15	B3	63	79.0507	610221	49314.9	kif2c
15	B3	64	79.358	599723	65379.3	kif2c
15	B3	65	79.6652	586919	86973.2	kif2c
15	B3	66	79.9725	567633	113536	kif2c
15	B3	67	80.2797	536791	143193	kif2c
15	B3	68	80.587	479805	172798	kif2c
15	B3	69	80.8943	406449	198389	kif2c
15	B3	70	81.2015	327542	215996	kif2c
15	B3	71	81.5088	247638	222546	kif2c
15	B3	72	81.816	168638	216609	kif2c
15	B3	73	82.1233	102585	198778	kif2c
15	B3	74	82.4305	47155.5	171565	kif2c
15	B3	75	82.7378	17885.6	138850	kif2c
15	B3	76	83.0451	8816.49	104991	kif2c
15	B3	77	83.3523	6547.11	73845.4	kif2c
15	B3	78	83.6596	5833.88	48022.4	kif2c
15	B3	79	83.9668	4583.27	28570.6	kif2c
15	B3	80	84.2741	3056.67	16987.1	kif2c
15	B3	81	84.5814	1284.06	10040.2	kif2c
15	B3	82	84.8886	-38.5605	5897.35	kif2c
15	B3	83	85.1959	80.1496	3525.09	kif2c
15	B3	84	85.5031	-134.934	2182.79	kif2c
15	B3	85	85.8104	44.3351	1416.96	kif2c
15	B3	86	86.1176	-822.081	976.293	kif2c
15	B3	87	86.4249	-548.589	721.17	kif2c
15	B3	88	86.7322	-531.204	564.281	kif2c
15	B3	89	87.0394	-1327.69	446.252	kif2c
15	B3	90	87.3467	-1849.37	332.83	kif2c
15	B3	91	87.6539	-1526.01	217.029	kif2c
15	B3	92	87.9612	-1175.62	114.373	kif2c
15	B3	93	88.2684	-562.005	48.2285	kif2c
15	B3	94	88.5757	-1367.79	31.9102	kif2c
15	B3	95	88.883	-1123.53	58.4219	kif2c
15	B3	96	89.1902	-2027.28	104.088	kif2c
15	B3	97	89.4975	-1647.31	142.332	kif2c
15	B3	98	89.8047	-1595.34	157.25	kif2c
15	B3	99	90.112	-2063.91	148.361	kif2c
15	B3	100	90.4193	-1554.98	125.838	kif2c
15	B3	101	90.7265	-2141.69	101.775	kif2c
15	B3	102	91.0338	-1932.47	83.8223	kif2c
15	B3	103	91.341	-1970.64	73.6367	kif2c
15	B3	104	91.6483	-2126.95	68.7812	kif2c
15	B3	105	91.9555	-2430.04	65.5293	kif2c
15	B3	106	92.2628	-1867.24	60.9883	kif2c
15	B3	107	92.5701	-2477.77	54.3027	kif2c
15	B3	108	92.8773	-2658.19	46.9434	kif2c
15	B3	109	93.1846	-2116.81	41.8926	kif2c
15	B3	110	93.4918	-2188.22	41.6953	kif2c
15	B3	111	93.7991	-2721.15	46.3203	kif2c
15	B3	112	94.1064	-2625.6	52.5859	kif2c
15	B3	113	94.4136	-2953.94	55.9805	kif2c
15	B3	114	94.7209	-2424.35	53.6016	kif2c
16	B4	1	60.0007	1.09641e+06	22248.3	GAPDH
16	B4	2	60.308	1.09144e+06	22687.4	GAPDH
16	B4	3	60.6152	1.08585e+06	23171.9	GAPDH
16	B4	4	60.9225	1.07896e+06	23680.9	GAPDH
16	B4	5	61.2297	1073137	24193.3	GAPDH
16	B4	6	61.537	1064951	24723.4	GAPDH
16	B4	7	61.8442	1056353	25296	GAPDH
16	B4	8	62.1515	1.04854e+06	25832.9	GAPDH
16	B4	9	62.4588	1.04128e+06	26320.6	GAPDH
16	B4	10	62.766	1.03257e+06	26743.6	GAPDH
16	B4	11	63.0733	1.02359e+06	27090.8	GAPDH
16	B4	12	63.3805	1.0146e+06	27360.2	GAPDH
16	B4	13	63.6878	1.00558e+06	27559	GAPDH
16	B4	14	63.9951	998250	27698.1	GAPDH
16	B4	15	64.3023	988887	27785.8	GAPDH
16	B4	16	64.6096	979247	27830.3	GAPDH
16	B4	17	64.9168	970123	27844.5	GAPDH
16	B4	18	65.2241	961710	27847.3	GAPDH
16	B4	19	65.5313	953221	27857.1	GAPDH
16	B4	20	65.8386	944090	27880.7	GAPDH
16	B4	21	66.1459	935154	27906	GAPDH
16	B4	22	66.4531	927602	27905.4	GAPDH
16	B4	23	66.7604	917845	27850.7	GAPDH
16	B4	24	67.0676	908144	27728.7	GAPDH
16	B4	25	67.3749	899729	27552.1	GAPDH
16	B4	26	67.6822	891110	27354.2	GAPDH
16	B4	27	67.9894	882938	27172	GAPDH
16	B4	28	68.2967	874538	27028.1	GAPDH
16	B4	29	68.6039	866373	26920.7	GAPDH
16	B4	30	68.9112	857591	26830.4	GAPDH
16	B4	31	69.2184	849417	26733.2	GAPDH
16	B4	32	69.5257	839871	26614.5	GAPDH
16	B4	33	69.833	831824	26471.7	GAPDH
16	B4	34	70.1402	824084	26308.4	GAPDH
16	B4	35	70.4475	815402	26126.7	GAPDH
16	B4	36	70.7547	806644	25926.3	GAPDH
16	B4	37	71.062	798298	25709.5	GAPDH
16	B4	38	71.3692	790102	25486.2	GAPDH
16	B4	39	71.6765	781904	25271.5	GAPDH
16	B4	40	71.9838	774981	25076.9	GAPDH
16	B4	41	72.291	765876	24902.2	GAPDH
16	B4	42	72.5983	758044	24737.1	GAPDH
16	B4	43	72.9055	750501	24569.9	GAPDH
16	B4	44	73.2128	741568	24422.1	GAPDH
16	B4	45	73.5201	734616	24282.3	GAPDH
16	B4	46	73.8273	727537	24156.5	GAPDH
16	B4	47	74.1346	719621	24049.5	GAPDH
16	B4	48	74.4418	711848	23956.6	GAPDH
16	B4	49	74.7491	704364	23868.2	GAPDH
16	B4	50	75.0564	697053	23776.7	GAPDH
16	B4	51	75.3636	689223	23681.5	GAPDH
16	B4	52	75.6709	682892	23587.2	GAPDH
16	B4	53	75.9781	675785	23497.9	GAPDH
16	B4	54	76.2854	667813	23413	GAPDH
16	B4	55	76.5926	661272	23328.3	GAPDH
16	B4	56	76.8999	653218	23243.1	GAPDH
16	B4	57	77.2072	646370	23165.5	GAPDH
16	B4	58	77.5144	639602	23117.1	GAPDH
16	B4	59	77.8217	631759	23135.9	GAPDH
16	B4	60	78.1289	624959	23285.8	GAPDH
16	B4	61	78.4362	618155	23683.3	GAPDH
16	B4	62	78.7434	610807	24548.8	GAPDH
16	B4	63	79.0507	603610	26617.1	GAPDH
16	B4	64	79.358	595216	30501.6	GAPDH
16	B4	65	79.6652	588555	37325.2	GAPDH
16	B4	66	79.9725	580324	48440.2	GAPDH
16	B4	67	80.2797	571674	65093	GAPDH
16	B4	68	80.587	559501	87868.5	GAPDH
16	B4	69	80.8943	542185	116062	GAPDH
16	B4	70	81.2015	511966	147273	GAPDH
16	B4	71	81.5088	449913	177519	GAPDH
16	B4	72	81.816	357728	201996	GAPDH
16	B4	73	82.1233	271402	216287	GAPDH
16	B4	74	82.4305	190731	217582	GAPDH
16	B4	75	82.7378	122115	205441	GAPDH
16	B4	76	83.0451	63399.8	181853	GAPDH
16	B4	77	83.3523	22094.8	150635	GAPDH
16	B4	78	83.6596	6139.86	116420	GAPDH
16	B4	79	83.9668	3399.29	83564.8	GAPDH
16	B4	80	84.2741	2584.67	55290.4	GAPDH
16	B4	81	84.5814	2145.82	33256.9	GAPDH
16	B4	82	84.8886	1209.68	18762.7	GAPDH
16	B4	83	85.1959	1153.6	10308	GAPDH
16	B4	84	85.5031	1186.18	5312.78	GAPDH
16	B4	85	85.8104	1250.78	2618.13	GAPDH
16	B4	86	86.1176	711.769	1292.72	GAPDH
16	B4	87	86.4249	864.716	697.482	GAPDH
16	B4	88	86.7322	544.744	447.254	GAPDH
16	B4	89	87.0394	24.0205	337.303	GAPDH
16	B4	90	87.3467	-130.737	275.359	GAPDH
16	B4	91	87.6539	500.07	231.369	GAPDH
16	B4	92	87.9612	97.2464	202.9	GAPDH
16	B4	93	88.2684	45.6565	192.775	GAPDH
16	B4	94	88.5757	-340.38	197.865	GAPDH
16	B4	95	88.883	-302.447	208.021	GAPDH
16	B4	96	89.1902	-743.426	211.217	GAPDH
16	B4	97	89.4975	-581.46	199.236	GAPDH
16	B4	98	89.8047	-534.075	170.012	GAPDH
16	B4	99	90.112	-1273.79	126.426	GAPDH
16	B4	100	90.4193	-478.829	74.082	GAPDH
16	B4	101	90.7265	-1166.68	20.2012	GAPDH
16	B4	102	91.0338	-1081.32	-26.4258	GAPDH
16	B4	103	91.341	-641.659	-56.2539	GAPDH
16	B4	104	91.6483	-877.19	-61.9648	GAPDH
16	B4	105	91.9555	-684.452	-42.668	GAPDH
16	B4	106	92.2628	-1200.87	-6.32227	GAPDH
16	B4	107	92.5701	-1302.79	32.1738	GAPDH
16	B4	108	92.8773	-1292.82	56.9375	GAPDH
16	B4	109	93.1846	-1440.82	57.7949	GAPDH
16	B4	110	93.4918	-1444.08	34.0391	GAPDH
16	B4	111	93.7991	-1608.97	-6.30859	GAPDH
16	B4	112	94.1064	-1292.62	-50.6816	GAPDH
16	B4	113	94.4136	-1453.71	-87.2695	GAPDH
16	B4	114	94.7209	-1199.33	-109.184	GAPDH
17	B5	1	60.0007	903418	18668	GAPDH
17	B5	2	60.308	898620	19023.8	GAPDH
17	B5	3	60.6152	895478	19448.9	GAPDH
17	B5	4	60.9225	890150	19919	GAPDH
17	B5	5	61.2297	883916	20397.1	GAPDH
17	B5	6	61.537	877336	20922.5	GAPDH
17	B5	7	61.8442	870948	21380.1	GAPDH
17	B5	8	62.1515	863529	21742.7	GAPDH
17	B5	9	62.4588	857220	22012	GAPDH
17	B5	10	62.766	849883	22210	GAPDH
17	B5	11	63.0733	842365	22371.3	GAPDH
17	B5	12	63.3805	835771	22528.6	GAPDH
17	B5	13	63.6878	828841	22698.1	GAPDH
17	B5	14	63.9951	822515	22871.5	GAPDH
17	B5	15	64.3023	814497	23022.4	GAPDH
17	B5	16	64.6096	807056	23123.4	GAPDH
17	B5	17	64.9168	799264	23163.6	GAPDH
17	B5	18	65.2241	791554	23153.9	GAPDH
17	B5	19	65.5313	784930	23118.9	GAPDH
17	B5	20	65.8386	777924	23077.9	GAPDH
17	B5	21	66.1459	770347	23034	GAPDH
17	B5	22	66.4531	763888	22975.3	GAPDH
17	B5	23	66.7604	755789	22888.6	GAPDH
17	B5	24	67.0676	748484	22773.6	GAPDH
17	B5	25	67.3749	740777	22647.9	GAPDH
17	B5	26	67.6822	735220	22536.9	GAPDH
17	B5	27	67.9894	727294	22458.2	GAPDH
17	B5	28	68.2967	721187	22409.2	GAPDH
17	B5	29	68.6039	713720	22368.7	GAPDH
17	B5	30	68.9112	706443	22307.6	GAPDH
17	B5	31	69.2184	699769	22205.5	GAPDH
17	B5	32	69.5257	692389	22060.1	GAPDH
17	B5	33	69.833	685181	21888	GAPDH
17	B5	34	70.1402	678636	21716	GAPDH
17	B5	35	70.4475	671646	21566.6	GAPDH
17	B5	36	70.7547	665528	21446.1	GAPDH
17	B5	37	71.062	658428	21342.5	GAPDH
17	B5	38	71.3692	651344	21233.5	GAPDH
17	B5	39	71.6765	644191	21100	GAPDH
17	B5	40	71.9838	637705	20938.3	GAPDH
17	B5	41	72.291	631345	20761.2	GAPDH
17	B5	42	72.5983	623828	20589.8	GAPDH
17	B5	43	72.9055	619204	20442.2	GAPDH
17	B5	44	73.2128	611309	20342.2	GAPDH
17	B5	45	73.5201	605312	20264.2	GAPDH
17	B5	46	73.8273	598953	20196.5	GAPDH
17	B5	47	74.1346	592693	20128.8	GAPDH
17	B5	48	74.4418	586198	20056.6	GAPDH
17	B5	49	74.7491	579992	19982	GAPDH
17	B5	50	75.0564	574065	19911.2	GAPDH
17	B5	51	75.3636	567771	19848.6	GAPDH
17	B5	52	75.6709	562137	19792.9	GAPDH
17	B5	53	75.9781	556533	19734.9	GAPDH
17	B5	54	76.2854	549570	19662.1	GAPDH
17	B5	55	76.5926	543549	19567.4	GAPDH
17	B5	56	76.8999	537330	19455.6	GAPDH
17	B5	57	77.2072	532215	19346.1	GAPDH
17	B5	58	77.5144	525808	19271.6	GAPDH
17	B5	59	77.8217	520233	19280.3	GAPDH
17	B5	60	78.1289	513672	19449.9	GAPDH
17	B5	61	78.4362	508201	19918.2	GAPDH
17	B5	62	78.7434	502829	21027.8	GAPDH
17	B5	63	79.0507	496706	23383.4	GAPDH
17	B5	64	79.358	490003	27644.4	GAPDH
17	B5	65	79.6652	483630	34817.7	GAPDH
17	B5	66	79.9725	476626	46000.1	GAPDH
17	B5	67	80.2797	468866	62026.3	GAPDH
17	B5	68	80.587	456719	82969.4	GAPDH
17	B5	69	80.8943	438707	107670	GAPDH
17	B5	70	81.2015	403915	133554	GAPDH
17	B5	71	81.5088	341507	156949	GAPDH
17	B5	72	81.816	264478	173891	GAPDH
17	B5	73	82.1233	195537	181178	GAPDH
17	B5	74	82.4305	132585	177265	GAPDH
17	B5	75	82.7378	78050.2	162672	GAPDH
17	B5	76	83.0451	35818.2	139800	GAPDH
17	B5	77	83.3523	12040.8	112244	GAPDH
17	B5	78	83.6596	5201.87	83878.8	GAPDH
17	B5	79	83.9668	4459.84	57991.8	GAPDH
17	B5	80	84.2741	3674.73	36709.2	GAPDH
17	B5	81	84.5814	3493.1	20831.3	GAPDH
17	B5	82	84.8886	3021.61	11716.7	GAPDH
17	B5	83	85.1959	3578.57	6122.5	GAPDH
17	B5	84	85.5031	3342.22	2985.04	GAPDH
17	B5	85	85.8104	3552.52	1401.75	GAPDH
17	B5	86	86.1176	2732.26	695.029	GAPDH
17	B5	87	86.4249	2968.01	424.004	GAPDH
17	B5	88	86.7322	2448.14	336.475	GAPDH
17	B5	89	87.0394	2317.2	306.82	GAPDH
17	B5	90	87.3467	2528.6	283.033	GAPDH
17	B5	91	87.6539	2055.9	249.631	GAPDH
17	B5	92	87.9612	2133.94	205.578	GAPDH
17	B5	93	88.2684	1535.94	153.807	GAPDH
17	B5	94	88.5757	2146.18	97.834	GAPDH
17	B5	95	88.883	1698.74	41.4238	GAPDH
17	B5	96	89.1902	2018.89	-11.0801	GAPDH
17	B5	97	89.4975	1231.07	-54.2559	GAPDH
17	B5	98	89.8047	1654.76	-81.5723	GAPDH
17	B5	99	90.112	2283.2	-87.1836	GAPDH
17	B5	100	90.4193	1853.11	-69.9473	GAPDH
17	B5	101	90.7265	1395.5	-37.2305	GAPDH
17	B5	102	91.0338	1497.98	-4.3125	GAPDH
17	B5	103	91.341	1194.62	12.0566	GAPDH
17	B5	104	91.6483	1000.79	2.44727	GAPDH
17	B5	105	91.9555	1478.94	-30.2441	GAPDH
17	B5	106	92.2628	1321.54	-73.0059	GAPDH
17	B5	107	92.5701	1311.79	-110.174	GAPDH
17	B5	108	92.8773	1335.52	-130.979	GAPDH
17	B5	109	93.1846	1008.9	-133.031	GAPDH
17	B5	110	93.4918	1614.01	-121.223	GAPDH
17	B5	111	93.7991	1019.27	-104.072	GAPDH
17	B5	112	94.1064	793.387	-89.8301	GAPDH
17	B5	113	94.4136	1227.86	-83.6445	GAPDH
17	B5	114	94.7209	1068.54	-86.3457	GAPDH
18	B6	1	60.0007	1.06923e+06	20532.2	GAPDH
18	B6	2	60.308	1.0643e+06	21089.4	GAPDH
18	B6	3	60.6152	1.06285e+06	21670.4	GAPDH
18	B6	4	60.9225	1.0499e+06	22246.1	GAPDH
18	B6	5	61.2297	1.04953e+06	22794.6	GAPDH
18	B6	6	61.537	1.03579e+06	23303.7	GAPDH
18	B6	7	61.8442	1.03715e+06	23780.6	GAPDH
18	B6	8	62.1515	1.02196e+06	24259.8	GAPDH
18	B6	9	62.4588	1.01948e+06	24722.5	GAPDH
18	B6	10	62.766	1.00403e+06	25202.3	GAPDH
18	B6	11	63.0733	1.00219e+06	25715.5	GAPDH
18	B6	12	63.3805	996638	26237.1	GAPDH
18	B6	13	63.6878	983500	26699.8	GAPDH
18	B6	14	63.9951	975919	27022.3	GAPDH
18	B6	15	64.3023	966795	27151.8	GAPDH
18	B6	16	64.6096	957142	27089.2	GAPDH
18	B6	17	64.9168	948806	26886.6	GAPDH
18	B6	18	65.2241	940190	26623.7	GAPDH
18	B6	19	65.5313	931905	26379	GAPDH
18	B6	20	65.8386	923609	26204.7	GAPDH
18	B6	21	66.1459	915942	26116.8	GAPDH
18	B6	22	66.4531	907750	26094.5	GAPDH
18	B6	23	66.7604	900082	26096.1	GAPDH
18	B6	24	67.0676	890380	26078	GAPDH
18	B6	25	67.3749	882099	26014.2	GAPDH
18	B6	26	67.6822	873707	25903.1	GAPDH
18	B6	27	67.9894	865892	25761.1	GAPDH
18	B6	28	68.2967	858714	25609.2	GAPDH
18	B6	29	68.6039	849462	25463.5	GAPDH
18	B6	30	68.9112	841290	25331.6	GAPDH
18	B6	31	69.2184	834480	25214.8	GAPDH
18	B6	32	69.5257	826107	25110.7	GAPDH
18	B6	33	69.833	817301	25015.2	GAPDH
18	B6	34	70.1402	810193	24924.6	GAPDH
18	B6	35	70.4475	801463	24835.9	GAPDH
18	B6	36	70.7547	794042	24747.4	GAPDH
18	B6	37	71.062	785781	24657.6	GAPDH
18	B6	38	71.3692	778313	24563	GAPDH
18	B6	39	71.6765	769836	24458.6	GAPDH
18	B6	40	71.9838	762252	24338.5	GAPDH
18	B6	41	72.291	754565	24198.7	GAPDH
18	B6	42	72.5983	746342	24039	GAPDH
18	B6	43	72.9055	738960	23864.9	GAPDH
18	B6	44	73.2128	731272	23685.9	GAPDH
18	B6	45	73.5201	724133	23530.1	GAPDH
18	B6	46	73.8273	716610	23391.5	GAPDH
18	B6	47	74.1346	709148	23273.9	GAPDH
18	B6	48	74.4418	702195	23180.5	GAPDH
18	B6	49	74.7491	694824	23112.6	GAPDH
18	B6	50	75.0564	687628	23069.5	GAPDH
18	B6	51	75.3636	680828	23048.3	GAPDH
18	B6	52	75.6709	673907	23041.5	GAPDH
18	B6	53	75.9781	666380	23037.3	GAPDH
18	B6	54	76.2854	659978	23023.1	GAPDH
18	B6	55	76.5926	652119	22991.8	GAPDH
18	B6	56	76.8999	644830	22946.8	GAPDH
18	B6	57	77.2072	637951	22905.1	GAPDH
18	B6	58	77.5144	631591	22896.1	GAPDH
18	B6	59	77.8217	623538	22964	GAPDH
18	B6	60	78.1289	616944	23182.5	GAPDH
18	B6	61	78.4362	610137	23693.8	GAPDH
18	B6	62	78.7434	602473	24886.6	GAPDH
18	B6	63	79.0507	595249	27230.9	GAPDH
18	B6	64	79.358	587971	31554.6	GAPDH
18	B6	65	79.6652	580582	38975.8	GAPDH
18	B6	66	79.9725	572668	50734.5	GAPDH
18	B6	67	80.2797	563068	67817	GAPDH
18	B6	68	80.587	549966	90414.7	GAPDH
18	B6	69	80.8943	529871	117401	GAPDH
18	B6	70	81.2015	491394	146104	GAPDH
18	B6	71	81.5088	420098	172607	GAPDH
18	B6	72	81.816	329303	192587	GAPDH
18	B6	73	82.1233	248285	202434	GAPDH
18	B6	74	82.4305	173276	200223	GAPDH
18	B6	75	82.7378	108679	186195	GAPDH
18	B6	76	83.0451	54374.3	162618	GAPDH
18	B6	77	83.3523	19384.1	133141	GAPDH
18	B6	78	83.6596	6306.11	101898	GAPDH
18	B6	79	83.9668	3788.45	72596.2	GAPDH
18	B6	80	84.2741	3412.14	47846.6	GAPDH
18	B6	81	84.5814	3587.81	28872.3	GAPDH
18	B6	82	84.8886	2585.58	16480.8	GAPDH
18	B6	83	85.1959	2423.34	8940.02	GAPDH
18	B6	84	85.5031	2511.29	4551.2	GAPDH
18	B6	85	85.8104	2172.76	2212.53	GAPDH
18	B6	86	86.1176	1957.35	1065.02	GAPDH
18	B6	87	86.4249	1863.24	538.869	GAPDH
18	B6	88	86.7322	1956.1	305.549	GAPDH
18	B6	89	87.0394	1372.82	199.07	GAPDH
18	B6	90	87.3467	1829.1	145.844	GAPDH
18	B6	91	87.6539	1506.68	116.771	GAPDH
18	B6	92	87.9612	1379.84	100.146	GAPDH
18	B6	93	88.2684	1221.97	89.0312	GAPDH
18	B6	94	88.5757	1401.14	77.2578	GAPDH
18	B6	95	88.883	889.723	60.0527	GAPDH
18	B6	96	89.1902	942.36	36.4941	GAPDH
18	B6	97	89.4975	727.727	11.1953	GAPDH
18	B6	98	89.8047	1279.08	-7.0293	GAPDH
18	B6	99	90.112	922.192	-10.1699	GAPDH
18	B6	100	90.4193	921.201	2.77148	GAPDH
18	B6	101	90.7265	904.159	22.9668	GAPDH
18	B6	102	91.0338	145.691	35.5918	GAPDH
18	B6	103	91.341	199.421	28.6992	GAPDH
18	B6	104	91.6483	351.68	0.84375	GAPDH
18	B6	105	91.9555	742.48	-38.5801	GAPDH
18	B6	106	92.2628	769.197	-76.707	GAPDH
18	B6	107	92.5701	72.427	-105.973	GAPDH
18	B6	108	92.8773	85.9131	-126.967	GAPDH
18	B6	109	93.1846	145.671	-143.873	GAPDH
18	B6	110	93.4918	570.471	-158.08	GAPDH
18	B6	111	93.7991	539.545	-166.557	GAPDH
18	B6	112	94.1064	194.455	-165.984	GAPDH
18	B6	113	94.4136	120.323	-157.625	GAPDH
18	B6	114	94.7209	131.704	-147.766	GAPDH
25	C1	1	60.0007	1.05998e+06	22703	kif2c
25	C1	2	60.308	1.05467e+06	23085.3	kif2c
25	C1	3	60.6152	1.05028e+06	23540.4	kif2c
25	C1	4	60.9225	1.04308e+06	24029.8	kif2c
25	C1	5	61.2297	1.03647e+06	24556.3	kif2c
25	C1	6	61.537	1028389	25045.2	kif2c
25	C1	7	61.8442	1.02015e+06	25434.1	kif2c
25	C1	8	62.1515	1.01116e+06	25728.6	kif2c
25	C1	9	62.4588	1.00327e+06	25959.7	kif2c
25	C1	10	62.766	995644	26164.7	kif2c
25	C1	11	63.0733	987225	26368.8	kif2c
25	C1	12	63.3805	978850	26573.2	kif2c
25	C1	13	63.6878	970705	26757.5	kif2c
25	C1	14	63.9951	961828	26891.4	kif2c
25	C1	15	64.3023	952741	26948.1	kif2c
25	C1	16	64.6096	944251	26914.3	kif2c
25	C1	17	64.9168	935590	26796.3	kif2c
25	C1	18	65.2241	926158	26618.2	kif2c
25	C1	19	65.5313	918082	26416.5	kif2c
25	C1	20	65.8386	910344	26228.3	kif2c
25	C1	21	66.1459	900981	26079.8	kif2c
25	C1	22	66.4531	894047	25978	kif2c
25	C1	23	66.7604	886082	25911.2	kif2c
25	C1	24	67.0676	876552	25857.6	kif2c
25	C1	25	67.3749	868133	25798.7	kif2c
25	C1	26	67.6822	860924	25725.3	kif2c
25	C1	27	67.9894	852334	25639.9	kif2c
25	C1	28	68.2967	843832	25550.6	kif2c
25	C1	29	68.6039	836301	25464.1	kif2c
25	C1	30	68.9112	827996	25381.5	kif2c
25	C1	31	69.2184	820426	25296.3	kif2c
25	C1	32	69.5257	812107	25198	kif2c
25	C1	33	69.833	803199	25079.3	kif2c
25	C1	34	70.1402	795948	24942.5	kif2c
25	C1	35	70.4475	787184	24800.1	kif2c
25	C1	36	70.7547	779544	24669.2	kif2c
25	C1	37	71.062	772316	24559.9	kif2c
25	C1	38	71.3692	763719	24469.4	kif2c
25	C1	39	71.6765	756215	24382.4	kif2c
25	C1	40	71.9838	748201	24281.6	kif2c
25	C1	41	72.291	739158	24167	kif2c
25	C1	42	72.5983	732307	24047.2	kif2c
25	C1	43	72.9055	725171	23922.9	kif2c
25	C1	44	73.2128	716798	23804.1	kif2c
25	C1	45	73.5201	709644	23694	kif2c
25	C1	46	73.8273	702071	23590.8	kif2c
25	C1	47	74.1346	693797	23492.4	kif2c
25	C1	48	74.4418	687487	23400.5	kif2c
25	C1	49	74.7491	679605	23319.9	kif2c
25	C1	50	75.0564	673396	23254.6	kif2c
25	C1	51	75.3636	665204	23205.9	kif2c
25	C1	52	75.6709	657869	23173.2	kif2c
25	C1	53	75.9781	651297	23156.1	kif2c
25	C1	54	76.2854	645122	23159	kif2c
25	C1	55	76.5926	636518	23195	kif2c
25	C1	56	76.8999	629600	23300.5	kif2c
25	C1	57	77.2072	622590	23559.4	kif2c
25	C1	58	77.5144	615633	24143.9	kif2c
25	C1	59	77.8217	607452	25581.3	kif2c
25	C1	60	78.1289	601198	28394.8	kif2c
25	C1	61	78.4362	593208	33439.2	kif2c
25	C1	62	78.7434	585952	41787.1	kif2c
25	C1	63	79.0507	578333	54510.8	kif2c
25	C1	64	79.358	567996	72315	kif2c
25	C1	65	79.6652	552983	95076.8	kif2c
25	C1	66	79.9725	528495	121458	kif2c
25	C1	67	80.2797	488235	148801	kif2c
25	C1	68	80.587	419604	173459	kif2c
25	C1	69	80.8943	342998	191521	kif2c
25	C1	70	81.2015	268797	199762	kif2c
25	C1	71	81.5088	196128	196489	kif2c
25	C1	72	81.816	127114	182033	kif2c
25	C1	73	82.1233	75595.8	158715	kif2c
25	C1	74	82.4305	48645.4	130283	kif2c
25	C1	75	82.7378	42037.7	100960	kif2c
25	C1	76	83.0451	38658.5	74389.3	kif2c
25	C1	77	83.3523	35538.2	52847.3	kif2c
25	C1	78	83.6596	31259.2	36970.2	kif2c
25	C1	79	83.9668	24236.3	26044.1	kif2c
25	C1	80	84.2741	14423.2	19519.6	kif2c
25	C1	81	84.5814	7829.78	15050.7	kif2c
25	C1	82	84.8886	5878.82	11497.5	kif2c
25	C1	83	85.1959	6366.07	8458.53	kif2c
25	C1	84	85.5031	5061.04	5865.08	kif2c
25	C1	85	85.8104	5822.22	3785.52	kif2c
25	C1	86	86.1176	4927.88	2270	kif2c
25	C1	87	86.4249	5626.92	1284.68	kif2c
25	C1	88	86.7322	5801.53	720.055	kif2c
25	C1	89	87.0394	4778.19	433.988	kif2c
25	C1	90	87.3467	4388.96	296.033	kif2c
25	C1	91	87.6539	3819	216.035	kif2c
25	C1	92	87.9612	4712.81	151.355	kif2c
25	C1	93	88.2684	4958.03	95.0312	kif2c
25	C1	94	88.5757	3836.35	54.1172	kif2c
25	C1	95	88.883	4342.32	31.1348	kif2c
25	C1	96	89.1902	3988.06	17.6016	kif2c
25	C1	97	89.4975	3775.48	-0.712891	kif2c
25	C1	98	89.8047	3846.26	-34.1621	kif2c
25	C1	99	90.112	3511.13	-83.0508	kif2c
25	C1	100	90.4193	3897.56	-138.051	kif2c
25	C1	101	90.7265	4048.39	-185.719	kif2c
25	C1	102	91.0338	3641.25	-215.443	kif2c
25	C1	103	91.341	3902.49	-224.312	kif2c
25	C1	104	91.6483	3659.03	-218.008	kif2c
25	C1	105	91.9555	3893.18	-207.674	kif2c
25	C1	106	92.2628	3406.82	-204.311	kif2c
25	C1	107	92.5701	3349.34	-213.045	kif2c
25	C1	108	92.8773	3495.39	-230.219	kif2c
25	C1	109	93.1846	3944.95	-245.449	kif2c
25	C1	110	93.4918	3842.79	-248.195	kif2c
25	C1	111	93.7991	3535.02	-234.949	kif2c
25	C1	112	94.1064	3302.8	-211.809	kif2c
25	C1	113	94.4136	3138.14	-190.43	kif2c
25	C1	114	94.7209	3524.57	-180.502	kif2c
26	C2	1	60.0007	1160532	24721.3	kif2c
26	C2	2	60.308	1155189	25192	kif2c
26	C2	3	60.6152	1148386	25729.4	kif2c
26	C2	4	60.9225	1142375	26298.2	kif2c
26	C2	5	61.2297	1.13433e+06	26897.5	kif2c
26	C2	6	61.537	1125560	27517	kif2c
26	C2	7	61.8442	1.11671e+06	28041.6	kif2c
26	C2	8	62.1515	1.1071e+06	28470.6	kif2c
26	C2	9	62.4588	1.09836e+06	28828	kif2c
26	C2	10	62.766	1.08933e+06	29147	kif2c
26	C2	11	63.0733	1.07995e+06	29452.9	kif2c
26	C2	12	63.3805	1.07135e+06	29750.2	kif2c
26	C2	13	63.6878	1.06157e+06	30019.8	kif2c
26	C2	14	63.9951	1.05195e+06	30230.8	kif2c
26	C2	15	64.3023	1.04234e+06	30355.2	kif2c
26	C2	16	64.6096	1.03179e+06	30383.4	kif2c
26	C2	17	64.9168	1.02224e+06	30330.4	kif2c
26	C2	18	65.2241	1.01263e+06	30231.3	kif2c
26	C2	19	65.5313	1.00292e+06	30126.7	kif2c
26	C2	20	65.8386	993520	30045.2	kif2c
26	C2	21	66.1459	984669	29991.2	kif2c
26	C2	22	66.4531	975471	29944.9	kif2c
26	C2	23	66.7604	965732	29875.8	kif2c
26	C2	24	67.0676	955379	29764.4	kif2c
26	C2	25	67.3749	945801	29614.2	kif2c
26	C2	26	67.6822	936830	29450.1	kif2c
26	C2	27	67.9894	928485	29301.3	kif2c
26	C2	28	68.2967	918705	29183.9	kif2c
26	C2	29	68.6039	909685	29093	kif2c
26	C2	30	68.9112	900855	29008.2	kif2c
26	C2	31	69.2184	891288	28906.6	kif2c
26	C2	32	69.5257	881624	28773.3	kif2c
26	C2	33	69.833	872840	28603.9	kif2c
26	C2	34	70.1402	864275	28402	kif2c
26	C2	35	70.4475	854128	28175.6	kif2c
26	C2	36	70.7547	845425	27934.1	kif2c
26	C2	37	71.062	836545	27687.8	kif2c
26	C2	38	71.3692	828099	27445.4	kif2c
26	C2	39	71.6765	819100	27214.5	kif2c
26	C2	40	71.9838	810266	26999.8	kif2c
26	C2	41	72.291	801106	26805.5	kif2c
26	C2	42	72.5983	793097	26639.8	kif2c
26	C2	43	72.9055	784814	26516.2	kif2c
26	C2	44	73.2128	776341	26399.2	kif2c
26	C2	45	73.5201	767600	26275.9	kif2c
26	C2	46	73.8273	758793	26135.8	kif2c
26	C2	47	74.1346	750438	25977.6	kif2c
26	C2	48	74.4418	743625	25810.6	kif2c
26	C2	49	74.7491	734907	25650.7	kif2c
26	C2	50	75.0564	726716	25515.3	kif2c
26	C2	51	75.3636	718681	25417.9	kif2c
26	C2	52	75.6709	711984	25364.2	kif2c
26	C2	53	75.9781	704268	25351.3	kif2c
26	C2	54	76.2854	696032	25371.8	kif2c
26	C2	55	76.5926	687976	25426.9	kif2c
26	C2	56	76.8999	679684	25552.1	kif2c
26	C2	57	77.2072	671992	25850	kif2c
26	C2	58	77.5144	664866	26533.7	kif2c
26	C2	59	77.8217	655543	28283.9	kif2c
26	C2	60	78.1289	649132	31724.2	kif2c
26	C2	61	78.4362	640722	37829.5	kif2c
26	C2	62	78.7434	631867	47814.1	kif2c
26	C2	63	79.0507	622850	62856.8	kif2c
26	C2	64	79.358	612309	83671.5	kif2c
26	C2	65	79.6652	594144	109982	kif2c
26	C2	66	79.9725	566341	140096	kif2c
26	C2	67	80.2797	519228	170837	kif2c
26	C2	68	80.587	441061	197973	kif2c
26	C2	69	80.8943	356337	217104	kif2c
26	C2	70	81.2015	275310	224753	kif2c
26	C2	71	81.5088	196330	219290	kif2c
26	C2	72	81.816	122615	201419	kif2c
26	C2	73	82.1233	69284.8	174037	kif2c
26	C2	74	82.4305	43989.2	141512	kif2c
26	C2	75	82.7378	37568.4	108568	kif2c
26	C2	76	83.0451	34093.1	79132.7	kif2c
26	C2	77	83.3523	30352.5	55522.3	kif2c
26	C2	78	83.6596	24892	38239.4	kif2c
26	C2	79	83.9668	17941.7	26423.4	kif2c
26	C2	80	84.2741	8283.19	19893.2	kif2c
26	C2	81	84.5814	1275.63	15205.1	kif2c
26	C2	82	84.8886	517.709	11506.7	kif2c
26	C2	83	85.1959	1047.49	8406.16	kif2c
26	C2	84	85.5031	88.7666	5827.66	kif2c
26	C2	85	85.8104	287.398	3809.46	kif2c
26	C2	86	86.1176	-95.8566	2360.17	kif2c
26	C2	87	86.4249	-507.877	1412.59	kif2c
26	C2	88	86.7322	98.6914	847.275	kif2c
26	C2	89	87.0394	-404.288	537.078	kif2c
26	C2	90	87.3467	-531.182	378.416	kif2c
26	C2	91	87.6539	-609.781	300.771	kif2c
26	C2	92	87.9612	-396.859	261.824	kif2c
26	C2	93	88.2684	-1087.13	238.293	kif2c
26	C2	94	88.5757	-506.253	218.439	kif2c
26	C2	95	88.883	-1201.23	197.756	kif2c
26	C2	96	89.1902	-920.856	176.764	kif2c
26	C2	97	89.4975	-1031.43	159.229	kif2c
26	C2	98	89.8047	-830.094	149.705	kif2c
26	C2	99	90.112	-1241.23	150.58	kif2c
26	C2	100	90.4193	-1284.68	159.85	kif2c
26	C2	101	90.7265	-819.112	170.938	kif2c
26	C2	102	91.0338	-1945.29	175.047	kif2c
26	C2	103	91.341	-1202.88	165.242	kif2c
26	C2	104	91.6483	-1877.08	140.268	kif2c
26	C2	105	91.9555	-1507.21	105.742	kif2c
26	C2	106	92.2628	-1129.71	71.5254	kif2c
26	C2	107	92.5701	-1791.36	46.5449	kif2c
26	C2	108	92.8773	-1427.29	34.4609	kif2c
26	C2	109	93.1846	-1533.49	32.9902	kif2c
26	C2	110	93.4918	-2138.57	36.916	kif2c
26	C2	111	93.7991	-1151.25	41.8672	kif2c
26	C2	112	94.1064	-1850.18	45.9551	kif2c
26	C2	113	94.4136	-1857.72	48.8027	kif2c
26	C2	114	94.7209	-1748.84	49.8848	kif2c
27	C3	1	60.0007	1.06619e+06	23048.5	kif2c
27	C3	2	60.308	1060574	23471.3	kif2c
27	C3	3	60.6152	1.0564e+06	23946	kif2c
27	C3	4	60.9225	1049169	24433.7	kif2c
27	C3	5	61.2297	1.04154e+06	24896.7	kif2c
27	C3	6	61.537	1033622	25369.8	kif2c
27	C3	7	61.8442	1.0254e+06	25781.4	kif2c
27	C3	8	62.1515	1.01807e+06	26126.1	kif2c
27	C3	9	62.4588	1.00954e+06	26413.4	kif2c
27	C3	10	62.766	1.00033e+06	26657.3	kif2c
27	C3	11	63.0733	992536	26873	kif2c
27	C3	12	63.3805	984251	27074.2	kif2c
27	C3	13	63.6878	975519	27267.2	kif2c
27	C3	14	63.9951	966902	27447.6	kif2c
27	C3	15	64.3023	958182	27602.7	kif2c
27	C3	16	64.6096	949673	27719.6	kif2c
27	C3	17	64.9168	940061	27795.1	kif2c
27	C3	18	65.2241	931064	27838.8	kif2c
27	C3	19	65.5313	922225	27868.6	kif2c
27	C3	20	65.8386	914293	27895.1	kif2c
27	C3	21	66.1459	905432	27912	kif2c
27	C3	22	66.4531	896944	27896.3	kif2c
27	C3	23	66.7604	887546	27823.5	kif2c
27	C3	24	67.0676	878223	27685.9	kif2c
27	C3	25	67.3749	869326	27501.4	kif2c
27	C3	26	67.6822	861289	27303.1	kif2c
27	C3	27	67.9894	853294	27120.8	kif2c
27	C3	28	68.2967	844731	26964.2	kif2c
27	C3	29	68.6039	836549	26823.3	kif2c
27	C3	30	68.9112	827064	26679.9	kif2c
27	C3	31	69.2184	819602	26524.1	kif2c
27	C3	32	69.5257	810881	26360.6	kif2c
27	C3	33	69.833	802031	26203.5	kif2c
27	C3	34	70.1402	795028	26064.3	kif2c
27	C3	35	70.4475	786023	25942.5	kif2c
27	C3	36	70.7547	778087	25826.2	kif2c
27	C3	37	71.062	769213	25700	kif2c
27	C3	38	71.3692	761302	25556	kif2c
27	C3	39	71.6765	752925	25397.9	kif2c
27	C3	40	71.9838	745228	25237.5	kif2c
27	C3	41	72.291	737389	25085.3	kif2c
27	C3	42	72.5983	728716	24945	kif2c
27	C3	43	72.9055	721570	24830.1	kif2c
27	C3	44	73.2128	713106	24714.2	kif2c
27	C3	45	73.5201	705674	24591.4	kif2c
27	C3	46	73.8273	697886	24460.1	kif2c
27	C3	47	74.1346	689459	24322.3	kif2c
27	C3	48	74.4418	683395	24180	kif2c
27	C3	49	74.7491	675601	24032.8	kif2c
27	C3	50	75.0564	667504	23880.6	kif2c
27	C3	51	75.3636	660338	23727.8	kif2c
27	C3	52	75.6709	653082	23587.8	kif2c
27	C3	53	75.9781	646638	23478.5	kif2c
27	C3	54	76.2854	639872	23417.3	kif2c
27	C3	55	76.5926	632634	23418.2	kif2c
27	C3	56	76.8999	624633	23505.2	kif2c
27	C3	57	77.2072	618033	23742.8	kif2c
27	C3	58	77.5144	610143	24279.4	kif2c
27	C3	59	77.8217	603130	25472.8	kif2c
27	C3	60	78.1289	596613	27991.3	kif2c
27	C3	61	78.4362	588813	32506.6	kif2c
27	C3	62	78.7434	581449	39999.9	kif2c
27	C3	63	79.0507	573142	51502.9	kif2c
27	C3	64	79.358	563489	67798.7	kif2c
27	C3	65	79.6652	548613	89009.4	kif2c
27	C3	66	79.9725	527218	114191	kif2c
27	C3	67	80.2797	490984	141132	kif2c
27	C3	68	80.587	430623	166517	kif2c
27	C3	69	80.8943	357283	186516	kif2c
27	C3	70	81.2015	280213	197652	kif2c
27	C3	71	81.5088	205589	197707	kif2c
27	C3	72	81.816	133771	186360	kif2c
27	C3	73	82.1233	78421.2	165334	kif2c
27	C3	74	82.4305	43487.6	137995	kif2c
27	C3	75	82.7378	31976.7	108493	kif2c
27	C3	76	83.0451	28428.2	80704.2	kif2c
27	C3	77	83.3523	26291.3	57354.3	kif2c
27	C3	78	83.6596	21441.6	39591.9	kif2c
27	C3	79	83.9668	16634.2	27122.4	kif2c
27	C3	80	84.2741	9571.78	19620.1	kif2c
27	C3	81	84.5814	2187.67	14720.8	kif2c
27	C3	82	84.8886	-259.746	11120.5	kif2c
27	C3	83	85.1959	-453.626	8228.94	kif2c
27	C3	84	85.5031	-902.267	5816.22	kif2c
27	C3	85	85.8104	-1753.51	3854	kif2c
27	C3	86	86.1176	-1034.77	2362.6	kif2c
27	C3	87	86.4249	-1159.62	1326.31	kif2c
27	C3	88	86.7322	-1507.96	677.84	kif2c
27	C3	89	87.0394	-1139.39	320.406	kif2c
27	C3	90	87.3467	-1342.67	155.633	kif2c
27	C3	91	87.6539	-1666.34	101.479	kif2c
27	C3	92	87.9612	-1747.31	98.4648	kif2c
27	C3	93	88.2684	-1705.65	108.719	kif2c
27	C3	94	88.5757	-2020.51	112.248	kif2c
27	C3	95	88.883	-2591.81	102.631	kif2c
27	C3	96	89.1902	-1886.09	82.2988	kif2c
27	C3	97	89.4975	-1933.89	57.0781	kif2c
27	C3	98	89.8047	-2773.14	30.8926	kif2c
27	C3	99	90.112	-2128.91	2.79883	kif2c
27	C3	100	90.4193	-2634.41	-31.7051	kif2c
27	C3	101	90.7265	-2732.85	-75.8008	kif2c
27	C3	102	91.0338	-2663.32	-126.389	kif2c
27	C3	103	91.341	-2221.36	-172.998	kif2c
27	C3	104	91.6483	-2582.66	-202.006	kif2c
27	C3	105	91.9555	-2245.83	-204.037	kif2c
27	C3	106	92.2628	-2253.44	-180.098	kif2c
27	C3	107	92.5701	-2932.19	-142.6	kif2c
27	C3	108	92.8773	-2460.87	-110.42	kif2c
27	C3	109	93.1846	-3068.84	-100.422	kif2c
27	C3	110	93.4918	-2897.94	-119.863	kif2c
27	C3	111	93.7991	-2787.4	-163.539	kif2c
27	C3	112	94.1064	-2679.33	-216.975	kif2c
27	C3	113	94.4136	-2517.62	-263.811	kif2c
27	C3	114	94.7209	-2488.24	-293.197	kif2c
28	C4	1	60.0007	1.0529e+06	21912.5	GAPDH
28	C4	2	60.308	1.04774e+06	22291.7	GAPDH
28	C4	3	60.6152	1.04184e+06	22699.3	GAPDH
28	C4	4	60.9225	1.03501e+06	23128.2	GAPDH
28	C4	5	61.2297	1.02895e+06	23575.3	GAPDH
28	C4	6	61.537	1.02154e+06	24082.3	GAPDH
28	C4	7	61.8442	1.01441e+06	24624.2	GAPDH
28	C4	8	62.1515	1.00645e+06	25138	GAPDH
28	C4	9	62.4588	997686	25596.1	GAPDH
28	C4	10	62.766	989534	25979.9	GAPDH
28	C4	11	63.0733	981455	26283	GAPDH
28	C4	12	63.3805	973761	26509.2	GAPDH
28	C4	13	63.6878	964218	26666.8	GAPDH
28	C4	14	63.9951	955683	26764.5	GAPDH
28	C4	15	64.3023	947604	26809.1	GAPDH
28	C4	16	64.6096	939496	26805.9	GAPDH
28	C4	17	64.9168	929604	26762.3	GAPDH
28	C4	18	65.2241	921122	26690.6	GAPDH
28	C4	19	65.5313	913267	26605.9	GAPDH
28	C4	20	65.8386	904969	26522.5	GAPDH
28	C4	21	66.1459	896023	26448.1	GAPDH
28	C4	22	66.4531	888308	26382.2	GAPDH
28	C4	23	66.7604	879904	26319.4	GAPDH
28	C4	24	67.0676	871241	26255.3	GAPDH
28	C4	25	67.3749	862534	26189.1	GAPDH
28	C4	26	67.6822	854844	26123.4	GAPDH
28	C4	27	67.9894	846515	26058.6	GAPDH
28	C4	28	68.2967	838796	25990.2	GAPDH
28	C4	29	68.6039	829574	25908.3	GAPDH
28	C4	30	68.9112	822229	25802.7	GAPDH
28	C4	31	69.2184	813744	25667.8	GAPDH
28	C4	32	69.5257	805744	25505.7	GAPDH
28	C4	33	69.833	796884	25325.2	GAPDH
28	C4	34	70.1402	789591	25138.1	GAPDH
28	C4	35	70.4475	781258	24954.5	GAPDH
28	C4	36	70.7547	773529	24780.9	GAPDH
28	C4	37	71.062	765438	24619.1	GAPDH
28	C4	38	71.3692	757337	24470	GAPDH
28	C4	39	71.6765	749526	24332.5	GAPDH
28	C4	40	71.9838	742278	24203.1	GAPDH
28	C4	41	72.291	734258	24074.6	GAPDH
28	C4	42	72.5983	726155	23937.4	GAPDH
28	C4	43	72.9055	718207	23785.6	GAPDH
28	C4	44	73.2128	711500	23645.8	GAPDH
28	C4	45	73.5201	703225	23507.1	GAPDH
28	C4	46	73.8273	696289	23382.2	GAPDH
28	C4	47	74.1346	689042	23282.3	GAPDH
28	C4	48	74.4418	681625	23211.8	GAPDH
28	C4	49	74.7491	674453	23165.4	GAPDH
28	C4	50	75.0564	667509	23129.6	GAPDH
28	C4	51	75.3636	660036	23087.8	GAPDH
28	C4	52	75.6709	652662	23025.3	GAPDH
28	C4	53	75.9781	646199	22935.7	GAPDH
28	C4	54	76.2854	638745	22824.2	GAPDH
28	C4	55	76.5926	631315	22706.7	GAPDH
28	C4	56	76.8999	624833	22605.8	GAPDH
28	C4	57	77.2072	618495	22545	GAPDH
28	C4	58	77.5144	610862	22547.1	GAPDH
28	C4	59	77.8217	603489	22642.3	GAPDH
28	C4	60	78.1289	597158	22890.8	GAPDH
28	C4	61	78.4362	590158	23424.2	GAPDH
28	C4	62	78.7434	582223	24640.1	GAPDH
28	C4	63	79.0507	575932	27128.4	GAPDH
28	C4	64	79.358	568229	31699.3	GAPDH
28	C4	65	79.6652	560355	39531.9	GAPDH
28	C4	66	79.9725	552795	51928	GAPDH
28	C4	67	80.2797	544197	69908.4	GAPDH
28	C4	68	80.587	530302	93630.5	GAPDH
28	C4	69	80.8943	509663	121824	GAPDH
28	C4	70	81.2015	471717	151550	GAPDH
28	C4	71	81.5088	401113	178529	GAPDH
28	C4	72	81.816	309916	198084	GAPDH
28	C4	73	82.1233	228026	206400	GAPDH
28	C4	74	82.4305	152999	201634	GAPDH
28	C4	75	82.7378	91307.6	184441	GAPDH
28	C4	76	83.0451	44081.1	157740	GAPDH
28	C4	77	83.3523	19143.1	125856	GAPDH
28	C4	78	83.6596	13393	93367.6	GAPDH
28	C4	79	83.9668	12213.7	64061.4	GAPDH
28	C4	80	84.2741	11180.1	40275.6	GAPDH
28	C4	81	84.5814	11223.9	22926.9	GAPDH
28	C4	82	84.8886	10326.6	13019	GAPDH
28	C4	83	85.1959	11109.4	6974.05	GAPDH
28	C4	84	85.5031	9574.41	3616.85	GAPDH
28	C4	85	85.8104	10184.7	1926.56	GAPDH
28	C4	86	86.1176	9700.8	1161.88	GAPDH
28	C4	87	86.4249	9398.07	853.938	GAPDH
28	C4	88	86.7322	8654.18	738.689	GAPDH
28	C4	89	87.0394	8494.02	684.182	GAPDH
28	C4	90	87.3467	8298.6	635.955	GAPDH
28	C4	91	87.6539	8107.49	581.232	GAPDH
28	C4	92	87.9612	8035.77	524.965	GAPDH
28	C4	93	88.2684	7778.3	473.689	GAPDH
28	C4	94	88.5757	7677.6	427.512	GAPDH
28	C4	95	88.883	6889.59	380.678	GAPDH
28	C4	96	89.1902	6892.93	327.953	GAPDH
28	C4	97	89.4975	7272.6	270.68	GAPDH
28	C4	98	89.8047	6792.04	217.33	GAPDH
28	C4	99	90.112	7077.67	178.166	GAPDH
28	C4	100	90.4193	7064.87	158.553	GAPDH
28	C4	101	90.7265	5813.37	156.383	GAPDH
28	C4	102	91.0338	6869.31	164.914	GAPDH
28	C4	103	91.341	6343.59	177.584	GAPDH
28	C4	104	91.6483	6009.11	190.33	GAPDH
28	C4	105	91.9555	6377.35	200.496	GAPDH
28	C4	106	92.2628	5889.7	205.154	GAPDH
28	C4	107	92.5701	5069.07	201.83	GAPDH
28	C4	108	92.8773	5794.71	191.027	GAPDH
28	C4	109	93.1846	5997.31	177.289	GAPDH
28	C4	110	93.4918	5277.28	166.949	GAPDH
28	C4	111	93.7991	4988.8	164.299	GAPDH
28	C4	112	94.1064	5366.27	169.66	GAPDH
28	C4	113	94.4136	4993.74	180.613	GAPDH
28	C4	114	94.7209	5147.46	194.492	GAPDH
29	C5	1	60.0007	989169	20468.9	GAPDH
29	C5	2	60.308	985537	20890.8	GAPDH
29	C5	3	60.6152	980933	21363.8	GAPDH
29	C5	4	60.9225	974978	21856.5	GAPDH
29	C5	5	61.2297	967971	22337.8	GAPDH
29	C5	6	61.537	960171	22811.1	GAPDH
29	C5	7	61.8442	953877	23267.6	GAPDH
29	C5	8	62.1515	946746	23679.5	GAPDH
29	C5	9	62.4588	938682	24050.4	GAPDH
29	C5	10	62.766	930838	24383.1	GAPDH
29	C5	11	63.0733	923259	24679.2	GAPDH
29	C5	12	63.3805	915618	24936.1	GAPDH
29	C5	13	63.6878	907387	25144	GAPDH
29	C5	14	63.9951	900038	25287.4	GAPDH
29	C5	15	64.3023	891084	25354.2	GAPDH
29	C5	16	64.6096	882714	25344.9	GAPDH
29	C5	17	64.9168	874576	25279.9	GAPDH
29	C5	18	65.2241	866134	25192.7	GAPDH
29	C5	19	65.5313	858588	25117.4	GAPDH
29	C5	20	65.8386	851142	25071.8	GAPDH
29	C5	21	66.1459	843168	25051.2	GAPDH
29	C5	22	66.4531	835305	25034.1	GAPDH
29	C5	23	66.7604	826920	24997.2	GAPDH
29	C5	24	67.0676	818679	24928.3	GAPDH
29	C5	25	67.3749	810593	24830.6	GAPDH
29	C5	26	67.6822	803607	24715.4	GAPDH
29	C5	27	67.9894	795880	24593.6	GAPDH
29	C5	28	68.2967	787253	24469.7	GAPDH
29	C5	29	68.6039	780163	24344.1	GAPDH
29	C5	30	68.9112	772181	24215.5	GAPDH
29	C5	31	69.2184	765201	24082.3	GAPDH
29	C5	32	69.5257	757168	23942.2	GAPDH
29	C5	33	69.833	749079	23792.2	GAPDH
29	C5	34	70.1402	742288	23630.9	GAPDH
29	C5	35	70.4475	734070	23462.4	GAPDH
29	C5	36	70.7547	726463	23298.6	GAPDH
29	C5	37	71.062	719540	23155.3	GAPDH
29	C5	38	71.3692	712038	23045	GAPDH
29	C5	39	71.6765	704855	22969.4	GAPDH
29	C5	40	71.9838	697761	22915.4	GAPDH
29	C5	41	72.291	690111	22860.1	GAPDH
29	C5	42	72.5983	681818	22781.2	GAPDH
29	C5	43	72.9055	675469	22666.7	GAPDH
29	C5	44	73.2128	667964	22525	GAPDH
29	C5	45	73.5201	660958	22373.2	GAPDH
29	C5	46	73.8273	654255	22216.7	GAPDH
29	C5	47	74.1346	646492	22068.3	GAPDH
29	C5	48	74.4418	640502	21938.2	GAPDH
29	C5	49	74.7491	633222	21833.2	GAPDH
29	C5	50	75.0564	627265	21756.1	GAPDH
29	C5	51	75.3636	620078	21704.3	GAPDH
29	C5	52	75.6709	613388	21671.3	GAPDH
29	C5	53	75.9781	606983	21647.5	GAPDH
29	C5	54	76.2854	600715	21622.7	GAPDH
29	C5	55	76.5926	593527	21588.9	GAPDH
29	C5	56	76.8999	586749	21543.7	GAPDH
29	C5	57	77.2072	580566	21495.8	GAPDH
29	C5	58	77.5144	573425	21471.9	GAPDH
29	C5	59	77.8217	566261	21525.9	GAPDH
29	C5	60	78.1289	561217	21755.6	GAPDH
29	C5	61	78.4362	553885	22333.7	GAPDH
29	C5	62	78.7434	547154	23673.8	GAPDH
29	C5	63	79.0507	540851	26319	GAPDH
29	C5	64	79.358	533579	31067	GAPDH
29	C5	65	79.6652	526436	38985.8	GAPDH
29	C5	66	79.9725	518399	51191.5	GAPDH
29	C5	67	80.2797	508933	68452.9	GAPDH
29	C5	68	80.587	495728	90664.4	GAPDH
29	C5	69	80.8943	472953	116388	GAPDH
29	C5	70	81.2015	430718	142736	GAPDH
29	C5	71	81.5088	357031	165788	GAPDH
29	C5	72	81.816	272257	181497	GAPDH
29	C5	73	82.1233	197294	186793	GAPDH
29	C5	74	82.4305	127714	180462	GAPDH
29	C5	75	82.7378	71312.8	163463	GAPDH
29	C5	76	83.0451	28550.9	138619	GAPDH
29	C5	77	83.3523	7866.01	109815	GAPDH
29	C5	78	83.6596	3124.81	81016.2	GAPDH
29	C5	79	83.9668	2175.19	55400.9	GAPDH
29	C5	80	84.2741	1715.59	34853.9	GAPDH
29	C5	81	84.5814	1297.73	20174.5	GAPDH
29	C5	82	84.8886	1669.13	11291.9	GAPDH
29	C5	83	85.1959	1583.72	5941.41	GAPDH
29	C5	84	85.5031	966.812	3007.81	GAPDH
29	C5	85	85.8104	721.215	1537.98	GAPDH
29	C5	86	86.1176	283.034	853.568	GAPDH
29	C5	87	86.4249	444.98	543.164	GAPDH
29	C5	88	86.7322	318.557	395.055	GAPDH
29	C5	89	87.0394	285.358	318.869	GAPDH
29	C5	90	87.3467	178.408	282.547	GAPDH
29	C5	91	87.6539	194.047	272.803	GAPDH
29	C5	92	87.9612	-136.466	276.959	GAPDH
29	C5	93	88.2684	-463.287	279.652	GAPDH
29	C5	94	88.5757	-332.783	267.133	GAPDH
29	C5	95	88.883	-898.692	233.018	GAPDH
29	C5	96	89.1902	-837.63	181.154	GAPDH
29	C5	97	89.4975	-244.145	123.65	GAPDH
29	C5	98	89.8047	-798.231	74.9473	GAPDH
29	C5	99	90.112	-792.216	44.9746	GAPDH
29	C5	100	90.4193	-394.369	35.1699	GAPDH
29	C5	101	90.7265	-1028.02	39.3359	GAPDH
29	C5	102	91.0338	-1224.14	48.291	GAPDH
29	C5	103	91.341	-571.11	55.0039	GAPDH
29	C5	104	91.6483	-1159.15	57.0312	GAPDH
29	C5	105	91.9555	-1125.55	55.3965	GAPDH
29	C5	106	92.2628	-1098.62	51.5723	GAPDH
29	C5	107	92.5701	-965.379	45.2637	GAPDH
29	C5	108	92.8773	-1525.91	34.6953	GAPDH
29	C5	109	93.1846	-1336.82	18.9688	GAPDH
29	C5	110	93.4918	-1348.31	0.326172	GAPDH
29	C5	111	93.7991	-1114.53	-15.8516	GAPDH
29	C5	112	94.1064	-1350.59	-23.7656	GAPDH
29	C5	113	94.4136	-1150.86	-20.7793	GAPDH
29	C5	114	94.7209	-1538.74	-9.02148	GAPDH
30	C6	1	60.0007	989500	20990.8	GAPDH
30	C6	2	60.308	984096	21328.8	GAPDH
30	C6	3	60.6152	979117	21706.9	GAPDH
30	C6	4	60.9225	972844	22113.9	GAPDH
30	C6	5	61.2297	966947	22549.8	GAPDH
30	C6	6	61.537	959306	23007.8	GAPDH
30	C6	7	61.8442	952784	23449.4	GAPDH
30	C6	8	62.1515	944656	23852.3	GAPDH
30	C6	9	62.4588	937361	24197.3	GAPDH
30	C6	10	62.766	929218	24474	GAPDH
30	C6	11	63.0733	920759	24682.8	GAPDH
30	C6	12	63.3805	913970	24831.4	GAPDH
30	C6	13	63.6878	905543	24930.1	GAPDH
30	C6	14	63.9951	897318	24989.3	GAPDH
30	C6	15	64.3023	889390	25018.4	GAPDH
30	C6	16	64.6096	880964	25026.5	GAPDH
30	C6	17	64.9168	873123	25020.2	GAPDH
30	C6	18	65.2241	865045	25000.8	GAPDH
30	C6	19	65.5313	857083	24962.5	GAPDH
[truncated: 2,147 more rows]

## Sheet: Melt Curve Result
Block Type	96-Well 0.2-mL Block
Calibration Background is expired	No
Calibration Background performed on	09-09-2019
Calibration Pure Dye ABY is expired	No
Calibration Pure Dye ABY performed on	09-09-2019
Calibration Pure Dye FAM is expired	No
Calibration Pure Dye FAM performed on	09-09-2019
Calibration Pure Dye JUN is expired	No
Calibration Pure Dye JUN performed on	09-09-2019
Calibration Pure Dye NED is expired	No
Calibration Pure Dye NED performed on	09-09-2019
Calibration Pure Dye ROX is expired	No
Calibration Pure Dye ROX performed on	09-09-2019
Calibration Pure Dye SYBR is expired	No
Calibration Pure Dye SYBR performed on	09-09-2019
Calibration Pure Dye TAMRA is expired	No
Calibration Pure Dye TAMRA performed on	09-09-2019
Calibration Pure Dye VIC is expired	No
Calibration Pure Dye VIC performed on	09-09-2019
Calibration ROI is expired	No
Calibration ROI performed on	09-09-2019
Calibration Uniformity is expired	No
Calibration Uniformity performed on	09-09-2019
Chemistry	SYBR_GREEN
Date Created	2021-04-26 22:51:25 PM PDT
Experiment Barcode
Experiment Comment
Experiment File Name	D:\WWW\2021-04-26_205009.eds
Experiment Name	2021-04-26_205009
Experiment Run End Time	2021-04-26 15:32:46 PM PDT
Experiment Type	Comparative Cт (ΔΔCт)
Instrument Name	2763219080101
Instrument Serial Number	2763219080101
Instrument Type	QuantStudio™ 3 System
Passive Reference	ROX
Post-read Stage/Step
Pre-read Stage/Step
Quantification Cycle Method	Ct
Signal Smoothing On	true
Stage where Melt Analysis is performed	Stage3
Stage/ Cycle where Ct Analysis is performed	Stage2, Step2
User Name
Well	Well Position	Sample	Target Name	Tm	Melt Peak Height
1	A1	AT0	kif2c	81.3551	217305
2	A2	AT0	kif2c	81.3551	176112
3	A3	AT0	kif2c	81.6624	198278
4	A4	AT0	GAPDH	82.4305	189025
5	A5	AT0	GAPDH	82.2769	185955
6	A6	AT0	GAPDH	82.2769	200699
13	B1	AT1	kif2c	81.3551	212798
14	B2	AT1	kif2c	81.3551	217555
15	B3	AT1	kif2c	81.5088	222546
16	B4	AT1	GAPDH	82.2769	218646
17	B5	AT1	GAPDH	82.1233	181178
18	B6	AT1	GAPDH	82.2769	202873
25	C1	AT2	kif2c	81.2015	199762
26	C2	AT2	kif2c	81.2015	224753
27	C3	AT2	kif2c	81.3551	199134
28	C4	AT2	GAPDH	82.1233	206400
29	C5	AT2	GAPDH	82.1233	186793
30	C6	AT2	GAPDH	82.1233	181442
37	D1	AC0	kif2c	81.2015	235448
38	D2	AC0	kif2c	81.2015	236772
39	D3	AC0	kif2c	81.2015	215304
40	D4	AC0	GAPDH	82.1233	200157
41	D5	AC0	GAPDH	82.1233	180461
42	D6	AC0	GAPDH	81.9697	179104
49	E1	AC1	kif2c	81.2015	232223
50	E2	AC1	kif2c	81.0479	205083
51	E3	AC1	kif2c	81.2015	200034
52	E4	AC1	GAPDH	81.9697	198210
53	E5	AC1	GAPDH	81.9697	185088
54	E6	AC1	GAPDH	81.9697	185291
61	F1	AC2	kif2c	81.0479	222146
62	F2	AC2	kif2c	81.0479	201613
63	F3	AC2	kif2c	81.0479	220387
64	F4	AC2	GAPDH	81.9697	206451
65	F5	AC2	GAPDH	81.9697	180858
66	F6	AC2	GAPDH	81.9697	172204
