# Supplementary material for: Identification of keygenes, miRNAs and miRNA-mRNA regulatory pathways for chemotherapy resistance in ovarian cancer
Source: PeerJ. 2021 Nov 8;9:e12353. doi: 10.7717/peerj.12353 (PMC8582303; doi:10.7717/peerj.12353)
Supplement: Supplemental Information 4 [file peerj-09-12353-s004.xlsx]

## Sheet: Sheet1
ID	adj.P.Val	P.Value	t	B	logFC	miRNA_ID	SPOT_ID
ILMN_3168467	0.000203	1.77e-07	5.96697	6.9898	1.90247	hsa-miR-656
ILMN_3167129	0.003045	5.42e-06	-5.03282	3.8803	-2.81321	hsa-miR-202*:9.1
ILMN_3168446	0.003045	7.98e-06	4.92433	3.5289	1.50424	hsa-miR-494
ILMN_3167414	0.004887	1.71e-05	-4.70872	2.8386	-0.895012		HS_141
ILMN_3167727	0.015971	8.53e-05	-4.23994	1.3819	-1.4604	hsa-miR-507
ILMN_3168087	0.015971	9.17e-05	-4.21864	1.3174	-2.39357	hsa-miR-510
ILMN_3167445	0.015971	0.000112	-4.15751	1.133	-2.30411	hsa-miR-513c
ILMN_3168779	0.015971	0.000119	-4.13958	1.0792	-2.26342	hsa-miR-513a-3p
ILMN_3167862	0.015971	0.000127	-4.12001	1.0205	-0.458535		HS_216
ILMN_3168693	0.015971	0.000139	4.09265	0.9388	1.23727	hsa-miR-15b*
ILMN_3168127	0.028506	0.000274	3.88637	0.3319	1.63381	hsa-miR-655
ILMN_3167972	0.028591	0.000312	3.846	0.2151	1.00334	hsa-miR-493*
ILMN_3168319	0.028591	0.000327	3.83116	0.1723	1.10564	hsa-miR-454
ILMN_3168178	0.028591	0.00035	3.81048	0.1128	1.41016	hsa-miR-493
ILMN_3168800	0.03109	0.000407	3.7626	-0.0241	1.58886	hsa-miR-379*
ILMN_3168328	0.032562	0.000468	-3.7191	-0.1477	-2.05526	hsa-miR-506
ILMN_3168869	0.032562	0.000483	-3.70853	-0.1776	-1.2423	hsa-miR-513a-5p
ILMN_3168716	0.046283	0.00076	3.56385	-0.5819	1.45871	hsa-miR-337-3p
ILMN_3168790	0.046283	0.000768	-3.56051	-0.5911	-2.48628	hsa-miR-509-3-5p
ILMN_3167913	0.049252	0.00086	3.52375	-0.6922	1.16366	hsa-miR-299-5p
ILMN_3168320	0.053331	0.000978	3.48192	-0.8065	1.55401	hsa-miR-1
ILMN_3167622	0.055623	0.00121	-3.41083	-0.9988	-0.53807		HS_138
ILMN_3167896	0.055623	0.00121	-3.41073	-0.9991	-2.11116	hsa-miR-513:9.1
ILMN_3168578	0.055623	0.00123	3.40549	-1.0131	1.18162	hsa-miR-1247
ILMN_3167458	0.055623	0.00125	3.39998	-1.0279	1.08652	hsa-miR-369-3p
ILMN_3167636	0.055623	0.00126	-3.39781	-1.0338	-1.44183	hsa-miR-508-5p
ILMN_3168363	0.060494	0.00143	-3.35739	-1.1417	-1.98344	hsa-miR-509-3p
ILMN_3168621	0.06572	0.00161	3.31753	-1.2473	1.03652	hsa-miR-22*
ILMN_3167240	0.071425	0.00181	3.27771	-1.3521	1.20083	hsa-miR-486-5p
ILMN_3168868	0.073582	0.00193	-3.25618	-1.4083	-2.26262	hsa-miR-513b
ILMN_3168599	0.073586	0.00199	3.24504	-1.4374	0.6043	hsa-miR-27b*
ILMN_3167109	0.090512	0.00256	-3.15958	-1.6578	-0.424356	hsa-miR-561
ILMN_3168871	0.090512	0.00261	-3.15281	-1.6751	-2.00839	hsa-miR-202*
ILMN_3166953	0.091831	0.00288	-3.11803	-1.7635	-1.80696	hsa-miR-202
ILMN_3168727	0.091831	0.00292	3.11363	-1.7747	0.898567	hsa-miR-30c-2*
ILMN_3168009	0.091831	0.00294	-3.11106	-1.7812	-0.294531	hsa-miR-620
ILMN_3168004	0.091831	0.00297	-3.10818	-1.7885	-0.398894	hsa-miR-569
ILMN_3168900	0.098687	0.00328	3.07376	-1.8751	0.99164		solexa-499-2217
ILMN_3168554	0.108364	0.0037	-3.03126	-1.9812	-0.380568	hsa-miR-499-3p
ILMN_3168758	0.108364	0.00379	-3.02211	-2.0039	-1.27795	hsa-miR-187*
ILMN_3168778	0.108364	0.00388	-3.01371	-2.0247	-0.406639	hsa-miR-1276
ILMN_3167158	0.108364	0.00397	3.00558	-2.0448	1.26059	hsa-miR-30a*
ILMN_3168672	0.110836	0.00416	2.98922	-2.0852	1.22395	hsa-miR-16-2*
ILMN_3168347	0.11257	0.00433	2.97552	-2.1188	0.876159	hsa-miR-409-5p
ILMN_3167719	0.112688	0.00443	-2.96712	-2.1394	-0.371393	hsa-miR-545
ILMN_3168547	0.115448	0.00464	-2.95061	-2.1797	-0.307637	hsa-miR-541*
ILMN_3168580	0.121479	0.00499	2.92461	-2.2429	1.19211	hsa-miR-221*
ILMN_3168242	0.123166	0.00516	2.91205	-2.2733	0.555251	hsa-miR-520e
ILMN_3168782	0.123641	0.00529	-2.90321	-2.2946	-0.158883	hsa-miR-302e
ILMN_3167319	0.128883	0.00563	2.88084	-2.3483	0.879234	hsa-let-7f-1*
ILMN_3167271	0.131776	0.00587	-2.86556	-2.3849	-0.452117	hsa-miR-384
ILMN_3168170	0.132674	0.00603	2.856	-2.4077	0.516787	hsa-miR-155
ILMN_3168715	0.132961	0.00615	2.84826	-2.4261	0.657445	hsa-miR-155*
ILMN_3167155	0.13356	0.00632	2.83869	-2.4488	1.03864		HS_305_b
ILMN_3168297	0.13356	0.00642	2.83305	-2.4622	0.542064	hsa-miR-365
ILMN_3168623	0.134499	0.00658	-2.82386	-2.4839	-0.653128	hsa-miR-19b-2*
ILMN_3167393	0.135527	0.00677	2.81344	-2.5084	0.61483	hsa-miR-496
ILMN_3168574	0.135527	0.00687	-2.80814	-2.5209	-0.631999	hsa-miR-125a-3p
ILMN_3168399	0.135696	0.00699	2.80138	-2.5368	0.919773	hsa-miR-126*
ILMN_3168714	0.139516	0.00737	-2.78187	-2.5825	-0.546494	hsa-miR-188-3p
ILMN_3167703	0.139516	0.00756	2.77232	-2.6048	0.621284	hsa-miR-150
ILMN_3168750	0.139516	0.00763	2.76913	-2.6122	0.94582	hsa-miR-1308
ILMN_3168832	0.139516	0.00776	-2.76252	-2.6276	-0.497175	hsa-miR-1225-3p
ILMN_3167991	0.139516	0.0078	2.76092	-2.6313	0.670689	hsa-miR-889
ILMN_3168190	0.140741	0.00805	-2.74905	-2.6588	-0.268854		HS_80
ILMN_3167573	0.140741	0.00829	-2.73814	-2.684	-0.403456		HS_267
ILMN_3168700	0.140741	0.00833	2.7364	-2.688	1.12549	hsa-miR-886-5p
ILMN_3167259	0.140741	0.00837	2.73459	-2.6922	0.792027	hsa-miR-199b-5p
ILMN_3168147	0.140741	0.00848	2.72955	-2.7038	0.645558	hsa-miR-520h,hsa-miR-520g
ILMN_3168535	0.146811	0.00903	-2.70602	-2.7578	-0.337234	hsa-miR-548g
ILMN_3168909	0.146811	0.0091	-2.70293	-2.7649	-0.488986		solexa-7111-119
ILMN_3168166	0.153926	0.00968	2.67975	-2.8177	0.893235	hsa-miR-485-3p
ILMN_3168730	0.155383	0.00991	2.67095	-2.8377	0.721577	hsa-miR-150*
ILMN_3168380	0.155911	0.0101	2.66449	-2.8523	0.984092	hsa-miR-218
ILMN_3167971	0.158631	0.0104	2.65279	-2.8787	0.205626	hsa-let-7a
ILMN_3167244	0.164883	0.011	2.6323	-2.9247	1.19082	hsa-miR-410
ILMN_3167493	0.164883	0.0114	-2.61732	-2.9582	-0.555649	hsa-miR-634
ILMN_3167669	0.164883	0.0115	-2.61313	-2.9676	-0.263801	hsa-miR-325
ILMN_3168592	0.164883	0.0117	2.60671	-2.9819	0.768606	hsa-miR-664*
ILMN_3168756	0.164883	0.0119	2.60186	-2.9926	0.98063	hsa-miR-144*
ILMN_3167120	0.164883	0.0125	-2.58238	-3.0358	-0.440622		HS_136
ILMN_3167287	0.164883	0.0125	2.58154	-3.0376	0.694732	hsa-miR-576-5p
ILMN_3168515	0.164883	0.0125	2.58127	-3.0382	0.96242	hsa-miR-224
ILMN_3168749	0.164883	0.0127	2.57579	-3.0503	0.572431	hsa-miR-455-3p
ILMN_3167422	0.164883	0.0128	2.57279	-3.0569	0.780096	hsa-miR-98
ILMN_3167695	0.164883	0.0128	2.57171	-3.0593	0.280909	hsa-miR-126
ILMN_3167004	0.164883	0.0134	-2.55512	-3.0957	-0.589902		HS_160
ILMN_3168834	0.164883	0.0135	-2.55073	-3.1053	-0.23162	hsa-miR-1827
ILMN_3168709	0.164883	0.0137	-2.54624	-3.1151	-0.31058	hsa-let-7f-2*
ILMN_3166948	0.164883	0.0137	2.54578	-3.1161	0.989617	hsa-miR-487a
ILMN_3168824	0.164883	0.014	-2.53704	-3.1352	-0.228071	hsa-miR-1283
ILMN_3168232	0.164883	0.0141	-2.53506	-3.1395	-0.243294		HS_16
ILMN_3168789	0.164883	0.0141	-2.53465	-3.1404	-1.45096	hsa-miR-509-5p
ILMN_3168488	0.164883	0.0141	-2.53361	-3.1426	-1.7674	hsa-miR-508-3p
ILMN_3168534	0.164883	0.0144	-2.52755	-3.1558	-0.367852	hsa-miR-548f
ILMN_3168240	0.164883	0.0144	2.52645	-3.1582	0.425368	hsa-miR-374a
ILMN_3167443	0.164883	0.0145	2.52281	-3.1661	0.797843	hsa-miR-379
ILMN_3167050	0.164883	0.0146	2.52209	-3.1677	1.00599	hsa-miR-452
ILMN_3167124	0.164883	0.0148	-2.51673	-3.1793	-0.446388	hsa-miR-191*
ILMN_3167552	0.164883	0.0149	2.51266	-3.1881	0.786222	hsa-miR-10a
ILMN_3167598	0.164883	0.015	2.51091	-3.1918	0.911862	hsa-miR-511
ILMN_3167818	0.164883	0.015	2.51039	-3.193	0.977689	hsa-miR-432
ILMN_3168891	0.164883	0.0151	2.5084	-3.1972	1.03572		solexa-2683-338
ILMN_3168745	0.164883	0.0152	-2.50457	-3.2055	-0.993179	hsa-miR-1182
ILMN_3167329	0.164883	0.0153	-2.50223	-3.2106	-0.17928		HS_161
ILMN_3166935	0.164883	0.0154	2.50049	-3.2143	0.829267	hsa-miR-329
ILMN_3168426	0.164883	0.0154	2.49987	-3.2156	0.86256	hsa-miR-148b
ILMN_3168894	0.166239	0.0157	2.49295	-3.2305	1.17718		solexa-3044-295
ILMN_3168608	0.177859	0.0169	-2.46215	-3.2963	-0.330766	hsa-miR-1256
ILMN_3168694	0.177859	0.0171	2.4588	-3.3035	0.695212	hsa-miR-886-3p
ILMN_3168141	0.177964	0.0174	-2.45085	-3.3203	-0.401761	hsa-miR-597
ILMN_3167242	0.177964	0.0175	-2.44921	-3.3238	-0.470277	hsa-miR-573
ILMN_3168464	0.177964	0.0177	-2.44467	-3.3334	-1.82609	hsa-miR-514
ILMN_3166992	0.177964	0.0177	2.44428	-3.3343	0.773113	hsa-miR-139-5p
ILMN_3167101	0.183264	0.0184	2.42899	-3.3665	0.756839		solexa-8048-104
ILMN_3168643	0.187258	0.019	2.41682	-3.3921	0.710559	hsa-miR-10a*
ILMN_3167720	0.190369	0.0195	2.40557	-3.4156	0.959353	hsa-miR-154*
ILMN_3168565	0.190369	0.0196	2.40325	-3.4204	1.03146	hsa-miR-1244
ILMN_3168118	0.191953	0.0199	2.39647	-3.4345	0.637218	hsa-miR-1228*
ILMN_3167363	0.192199	0.0203	-2.38974	-3.4486	-0.351932	hsa-miR-211
ILMN_3168542	0.192199	0.0206	-2.38394	-3.4606	-0.238121	hsa-miR-548k
ILMN_3167988	0.192199	0.0208	2.37895	-3.4709	1.03763	hsa-miR-411
ILMN_3168253	0.192199	0.0209	-2.37822	-3.4724	-1.30316	hsa-miR-512-5p
ILMN_3167105	0.192199	0.021	-2.37488	-3.4793	-0.267362	hsa-miR-208b
ILMN_3168840	0.192199	0.0211	-2.37395	-3.4813	-1.30176	hsa-miR-18b*
ILMN_3168767	0.192199	0.0212	2.37262	-3.484	1.22878	hsa-miR-376a*
ILMN_3168226	0.192199	0.0213	2.36948	-3.4905	0.205888	hsa-miR-23a
ILMN_3167449	0.193198	0.0216	-2.36415	-3.5015	-0.447296		HS_93
ILMN_3168690	0.194321	0.0219	-2.35789	-3.5143	-0.217872	hsa-miR-875-3p
ILMN_3167030	0.194321	0.0221	-2.35493	-3.5204	-0.609744	hsa-miR-548b-3p
ILMN_3167609	0.194321	0.0222	-2.35229	-3.5258	-0.565105	hsa-miR-515-3p
ILMN_3168165	0.195022	0.0225	2.34769	-3.5353	0.538439	hsa-miR-342-3p
ILMN_3168409	0.195292	0.0227	2.34402	-3.5428	0.211816	hsa-miR-27b
ILMN_3167286	0.198649	0.0235	-2.3295	-3.5724	-0.372268	hsa-miR-639
ILMN_3168182	0.198649	0.0239	2.32177	-3.5881	0.741203		HS_243.1
ILMN_3166980	0.198649	0.024	-2.3212	-3.5892	-0.264537		HS_121
ILMN_3168606	0.198649	0.024	-2.32089	-3.5899	-0.309478	hsa-miR-671-5p
ILMN_3167464	0.198649	0.0242	-2.31686	-3.598	-0.352963		HS_106
ILMN_3167269	0.198649	0.0242	-2.31667	-3.5984	-0.449359	hsa-miR-302c*
ILMN_3168322	0.198649	0.0247	-2.30929	-3.6133	-0.984822	hsa-miR-302b*
ILMN_3167046	0.198649	0.0251	2.30291	-3.6262	0.344208	hsa-miR-214
ILMN_3168485	0.198649	0.0251	-2.3029	-3.6262	-1.05076	hsa-miR-504
ILMN_3168392	0.198649	0.0251	2.30141	-3.6292	0.742854		HS_189.1
ILMN_3168387	0.198649	0.0252	-2.30017	-3.6317	-0.508146	hsa-miR-559
ILMN_3168354	0.198649	0.0252	2.29977	-3.6325	0.50171	hsa-miR-519d
ILMN_3167135	0.198649	0.0253	-2.29841	-3.6353	-0.255723	hsa-miR-208a
ILMN_3167313	0.202634	0.0261	-2.28651	-3.6592	-0.334361		HS_200
ILMN_3167542	0.202634	0.0262	2.28446	-3.6633	0.380201		HS_187
ILMN_3168912	0.204676	0.0268	-2.27524	-3.6817	-1.31811		solexa-7764-108
ILMN_3168870	0.204676	0.0268	-2.27465	-3.6829	-0.857307	hsa-miR-130a*
ILMN_3167749	0.208259	0.0276	-2.26308	-3.7059	-0.326407		HS_199
ILMN_3167831	0.208259	0.0276	-2.26182	-3.7084	-0.229228	hsa-miR-520d-5p
ILMN_3167505	0.209343	0.028	2.25621	-3.7196	0.401699		HS_78
ILMN_3167746	0.209343	0.0283	-2.2525	-3.7269	-0.447613	hsa-miR-580
ILMN_3167811	0.209343	0.0283	-2.25141	-3.7291	-1.03047	hsa-miR-623
ILMN_3168179	0.210198	0.0289	-2.24283	-3.746	-0.179613		HS_185.1
ILMN_3168150	0.210198	0.0291	-2.23955	-3.7525	-0.502879		HS_62
ILMN_3168884	0.210198	0.0292	2.23846	-3.7546	0.630036	hsa-miR-450b-5p
ILMN_3167299	0.210198	0.0297	2.2317	-3.7679	0.947412	hsa-miR-594:9.1
ILMN_3168451	0.210198	0.0298	-2.23073	-3.7698	-1.16492	hsa-miR-346
ILMN_3168557	0.210198	0.0301	-2.22603	-3.7791	-0.432883	hsa-miR-1243
ILMN_3168850	0.210198	0.0302	-2.2242	-3.7826	-0.460283	hsa-miR-1289
ILMN_3167997	0.210198	0.0309	2.21466	-3.8013	0.361657	hsa-miR-23b
ILMN_3167628	0.210198	0.031	2.21401	-3.8026	1.08344	hsa-miR-196a
ILMN_3167761	0.210198	0.0312	2.21091	-3.8086	0.722052	hsa-miR-212
ILMN_3167729	0.210198	0.0312	2.21044	-3.8095	0.175783	hsa-miR-30c
ILMN_3168015	0.210198	0.0314	-2.20838	-3.8135	-0.694901	hsa-miR-380*
ILMN_3168581	0.210198	0.0314	2.20788	-3.8145	0.865729	hsa-miR-1248
ILMN_3167386	0.210198	0.0316	-2.20585	-3.8185	-1.23632	hsa-miR-302d
ILMN_3168346	0.210198	0.0316	2.20527	-3.8196	0.442982	hsa-miR-152
ILMN_3167391	0.210198	0.0317	-2.20355	-3.8229	-0.242296	hsa-miR-633
ILMN_3167239	0.210198	0.0319	2.20086	-3.8282	0.844204	hsa-miR-382
ILMN_3167167	0.210198	0.032	-2.19991	-3.83	-0.40757	hsa-miR-190
ILMN_3167021	0.210198	0.0321	-2.1979	-3.8339	-0.295681		HS_129
ILMN_3167197	0.210198	0.0323	-2.19627	-3.8371	-0.355207		HS_36.1
ILMN_3166955	0.210198	0.0323	2.19573	-3.8381	0.438658	hsa-miR-369-5p
ILMN_3168016	0.210881	0.0326	-2.19191	-3.8455	-0.386882		HS_279_a
ILMN_3168757	0.211125	0.0329	2.18777	-3.8535	0.681103	hsa-miR-145*
ILMN_3168846	0.211125	0.0332	2.18385	-3.8611	0.683328	hsa-miR-744
ILMN_3168798	0.211125	0.0333	-2.18235	-3.864	-0.809022	hsa-miR-135a*
ILMN_3167880	0.211125	0.0335	-2.1797	-3.8691	-0.471151		HS_255
ILMN_3166987	0.211125	0.0336	-2.17946	-3.8695	-0.267273		HS_14.1
ILMN_3168885	0.214204	0.0345	2.16708	-3.8933	0.673691	hsa-miR-335*
ILMN_3168703	0.214204	0.0347	2.16485	-3.8976	0.704395	hsa-miR-223*
ILMN_3167405	0.214204	0.0348	-2.16439	-3.8985	-0.151991		HS_284
ILMN_3167434	0.214204	0.0348	2.16386	-3.8995	0.645722	hsa-miR-15a
ILMN_3168802	0.216944	0.0354	2.15605	-3.9144	0.334235	hsa-miR-664
ILMN_3166997	0.218214	0.0358	-2.15121	-3.9237	-0.344753		HS_120
ILMN_3168283	0.219518	0.0362	-2.14633	-3.9329	-0.283764	hsa-miR-490-3p
ILMN_3168866	0.220624	0.037	2.13765	-3.9494	0.732234	hsa-miR-340
ILMN_3168575	0.220624	0.037	-2.13749	-3.9497	-0.652589	hsa-miR-936
ILMN_3168579	0.220624	0.037	2.1373	-3.9501	0.60354	hsa-miR-132*
ILMN_3168808	0.22219	0.0375	-2.13125	-3.9615	-0.422374	hsa-miR-1208
ILMN_3167275	0.22219	0.0376	-2.12971	-3.9644	-0.323727	hsa-miR-602
ILMN_3168336	0.222757	0.0379	-2.12635	-3.9708	-0.948053	hsa-miR-632
ILMN_3167368	0.224422	0.0384	2.12086	-3.9811	0.560774		HS_6
ILMN_3167357	0.226896	0.0391	-2.11294	-3.996	-0.206573		HS_264.1
ILMN_3168536	0.226896	0.0392	-2.11162	-3.9985	-0.152966	hsa-miR-548h
ILMN_3167208	0.227347	0.0397	-2.10628	-4.0085	-0.348744	hsa-miR-302b
ILMN_3168602	0.227347	0.04	-2.10361	-4.0135	-0.225005	hsa-miR-219-1-3p
ILMN_3167060	0.227347	0.04	2.10346	-4.0138	0.601134	hsa-miR-15b
ILMN_3168683	0.227347	0.0404	2.0988	-4.0225	0.752524	hsa-miR-26a-2*
ILMN_3168097	0.227347	0.0405	2.09785	-4.0243	0.528732	hsa-miR-658
ILMN_3167034	0.227347	0.0405	-2.09764	-4.0246	-0.415189	hsa-miR-657
ILMN_3168721	0.234916	0.0421	-2.08103	-4.0555	-0.472112	hsa-miR-106a*
ILMN_3167955	0.235119	0.0423	-2.07849	-4.0602	-1.18579		HS_202.1
ILMN_3168528	0.23589	0.0427	-2.07481	-4.067	-0.166747	hsa-miR-562
ILMN_3167069	0.23589	0.0429	2.07276	-4.0708	0.756102		HS_209.1
ILMN_3167488	0.240121	0.0439	2.06203	-4.0906	0.457432		HS_22.1
ILMN_3167364	0.240121	0.0449	-2.05151	-4.1099	-0.701344		HS_52
ILMN_3168425	0.240121	0.0451	2.05036	-4.112	0.623864	hsa-miR-598
ILMN_3167920	0.240121	0.0452	-2.04861	-4.1152	-0.287723	hsa-miR-147
ILMN_3167604	0.240121	0.0453	-2.04833	-4.1157	-0.174398		HS_253
ILMN_3168177	0.240121	0.0454	-2.04678	-4.1185	-0.540183	hsa-miR-299-3p
ILMN_3167121	0.240121	0.0457	-2.04447	-4.1228	-0.400827		HS_304_a
ILMN_3167215	0.240121	0.0457	2.04395	-4.1237	0.599031	hsa-miR-370
ILMN_3168761	0.240121	0.0458	-2.04309	-4.1253	-0.381059	hsa-miR-615-5p
ILMN_3167492	0.240121	0.0458	-2.04293	-4.1255	-0.268634	hsa-miR-572
ILMN_3168906	0.240121	0.0459	2.04189	-4.1274	0.808858		solexa-578-1915
ILMN_3168365	0.240313	0.0469	2.03234	-4.1448	0.280191	hsa-let-7g
ILMN_3168498	0.240313	0.0471	-2.0308	-4.1476	-0.587969	hsa-miR-590-5p
ILMN_3168708	0.240313	0.0471	2.03076	-4.1477	0.855479	hsa-let-7a*
ILMN_3168847	0.240313	0.0471	2.03058	-4.148	0.99384	hsa-miR-31*
ILMN_3168855	0.240313	0.0472	2.02978	-4.1495	0.247464	hsa-miR-939
ILMN_3167469	0.240313	0.0473	-2.02887	-4.1511	-0.341502		HS_60
ILMN_3167148	0.240313	0.0474	-2.02742	-4.1537	-0.225505	hsa-miR-769-5p
ILMN_3166998	0.241937	0.0481	2.02157	-4.1643	0.753882	hsa-miR-340*
ILMN_3168028	0.241937	0.0482	2.02027	-4.1667	0.294006		HS_131
ILMN_3168841	0.241937	0.0484	-2.01846	-4.17	-0.215229	hsa-miR-146b-3p
ILMN_3167515	0.242536	0.0491	-2.01232	-4.181	-0.277267	hsa-miR-586
ILMN_3168537	0.242536	0.0491	-2.01141	-4.1827	-0.191739	hsa-miR-548a-5p
ILMN_3167849	0.242536	0.0492	-2.01118	-4.1831	-0.367352	hsa-miR-552
ILMN_3167633	0.242536	0.0494	-2.00953	-4.186	-0.32811		HS_190
ILMN_3167569	0.242888	0.0497	2.00604	-4.1923	0.626149	hsa-miR-421
ILMN_3168617	0.242888	0.0499	2.00501	-4.1942	0.449214	hsa-miR-616
ILMN_3168646	0.242969	0.0501	2.00293	-4.1979	0.832963	hsa-miR-21*
ILMN_3168269	0.248793	0.0515	-1.99027	-4.2205	-0.674538		HS_65
ILMN_3167383	0.251413	0.053	1.97738	-4.2435	0.87018	hsa-miR-431
ILMN_3166965	0.251413	0.053	-1.97688	-4.2444	-0.738036	hsa-miR-383
ILMN_3167373	0.251413	0.0532	1.9751	-4.2475	0.578878	hsa-miR-423-3p
ILMN_3167704	0.251413	0.0535	1.97265	-4.2518	0.528243	hsa-miR-566
ILMN_3168775	0.251413	0.0538	-1.97058	-4.2555	-0.786289	hsa-miR-1225-5p
ILMN_3168339	0.251413	0.0541	-1.96805	-4.26	-0.174653	hsa-miR-648
ILMN_3167629	0.251413	0.0541	-1.96753	-4.2609	-0.184075	hsa-miR-601
ILMN_3168414	0.251413	0.0541	-1.96738	-4.2612	-0.305059		HS_47
ILMN_3166972	0.251413	0.0542	-1.96682	-4.2622	-0.651644		HS_11.1
ILMN_3168359	0.251413	0.0542	-1.96663	-4.2625	-0.201916		HS_41
ILMN_3168718	0.253063	0.0548	-1.96178	-4.271	-0.136028	hsa-miR-526b
ILMN_3168532	0.253325	0.0551	-1.95946	-4.2751	-0.321802		HS_123
ILMN_3167028	0.253532	0.0555	-1.95614	-4.281	-0.404431	hsa-miR-641
ILMN_3168907	0.253532	0.0556	-1.95541	-4.2822	-0.31208		solexa-5874-144
ILMN_3168388	0.253776	0.0559	1.95314	-4.2862	0.686724	hsa-miR-7
ILMN_3167398	0.254738	0.0563	-1.94958	-4.2925	-0.169799		HS_57.1
ILMN_3168777	0.256202	0.0571	-1.9426	-4.3047	-0.360621	hsa-miR-653
ILMN_3168856	0.256202	0.0572	1.94181	-4.3061	0.366954	hsa-miR-193a-5p
ILMN_3168474	0.256202	0.0573	-1.94122	-4.3071	-0.431019		HS_167.1
ILMN_3168300	0.256202	0.0575	-1.9397	-4.3097	-0.503745	hsa-miR-518c*
ILMN_3168755	0.257026	0.0579	1.93643	-4.3154	0.522217	hsa-miR-29b-1*
ILMN_3167467	0.257363	0.0583	-1.93299	-4.3214	-0.426199	hsa-miR-645
ILMN_3168483	0.257363	0.0584	1.93225	-4.3227	0.527451	hsa-miR-146a
ILMN_3167551	0.259688	0.0596	1.92352	-4.3379	0.606176	hsa-let-7d
ILMN_3168195	0.259688	0.0597	-1.92205	-4.3404	-0.301709		HS_265.1
ILMN_3167163	0.259688	0.0598	-1.9215	-4.3414	-0.293638	hsa-miR-523
ILMN_3168109	0.259688	0.0601	-1.91927	-4.3452	-0.226958	hsa-miR-1298
ILMN_3168633	0.259688	0.0601	-1.91924	-4.3453	-0.225471	hsa-miR-1263
ILMN_3167189	0.261534	0.0608	1.91398	-4.3544	0.610682	hsa-let-7f
ILMN_3167986	0.261534	0.061	1.91202	-4.3577	0.627962		HS_58
ILMN_3168704	0.261534	0.0612	-1.9107	-4.36	-0.198921	hsa-miR-124*
ILMN_3168254	0.263558	0.0621	-1.90369	-4.372	-0.296167		HS_130
ILMN_3168594	0.263558	0.0621	-1.90364	-4.3721	-0.407318	hsa-miR-367*
ILMN_3168441	0.263799	0.0626	-1.90059	-4.3774	-0.405735	hsa-miR-449b
ILMN_3167707	0.263799	0.0627	-1.89976	-4.3788	-0.403581		HS_59
ILMN_3167152	0.263848	0.0629	1.89796	-4.3819	0.328951	hsa-miR-185
ILMN_3168734	0.264377	0.0634	1.89418	-4.3883	0.669923	hsa-miR-374b*
ILMN_3167172	0.264377	0.0638	1.89116	-4.3935	0.527489		HS_117
ILMN_3168069	0.264377	0.0639	1.89074	-4.3942	0.339172		HS_163
ILMN_3168596	0.264377	0.0643	-1.88769	-4.3994	-0.142877	hsa-miR-1252
ILMN_3168655	0.264377	0.0645	1.88639	-4.4016	0.611283	hsa-miR-32*
ILMN_3168654	0.264377	0.0646	-1.88516	-4.4037	-0.280617	hsa-miR-33a*
ILMN_3168224	0.264377	0.0647	-1.88514	-4.4037	-0.63861	hsa-miR-627
ILMN_3167068	0.264381	0.0649	-1.88346	-4.4066	-0.142743		HS_220
ILMN_3168872	0.265206	0.0653	-1.8803	-4.412	-0.339269	hsa-miR-516a-5p
ILMN_3168603	0.265206	0.0658	-1.87676	-4.418	-0.396313	hsa-miR-298
ILMN_3168381	0.265206	0.0659	-1.87585	-4.4195	-0.226772		HS_84
ILMN_3168626	0.265206	0.0663	-1.87357	-4.4234	-0.194119	hsa-miR-1259
ILMN_3167672	0.265206	0.0663	-1.87322	-4.424	-0.314994	hsa-miR-876-5p
ILMN_3168513	0.265206	0.0665	1.87204	-4.426	0.334065	hsa-let-7c
ILMN_3168904	0.267807	0.0674	1.86579	-4.4365	0.3325		solexa-555-1991
ILMN_3167097	0.269262	0.068	1.86158	-4.4436	0.188862		HS_261.1
ILMN_3168445	0.277124	0.0704	-1.84489	-4.4716	-0.156785		HS_137
ILMN_3168020	0.277124	0.0706	1.84378	-4.4735	0.231923		HS_96
ILMN_3167837	0.277124	0.0707	1.843	-4.4747	0.512403	hsa-miR-31
ILMN_3167524	0.280239	0.0717	1.83604	-4.4863	0.597222	hsa-miR-650
ILMN_3167696	0.282268	0.0729	-1.82832	-4.4992	-0.222098	hsa-miR-613
ILMN_3168572	0.282268	0.0731	-1.82693	-4.5015	-0.212634	hsa-miR-220c
ILMN_3168794	0.282268	0.0731	-1.82656	-4.5021	-0.654405	hsa-miR-1197
ILMN_3168044	0.282268	0.0735	-1.82439	-4.5057	-0.209771		HS_92
ILMN_3167361	0.282268	0.0736	-1.82362	-4.5069	-0.256358		HS_262.1
ILMN_3167294	0.282268	0.0737	-1.82289	-4.5081	-0.48864	hsa-miR-105
ILMN_3166979	0.282821	0.0741	1.82034	-4.5123	0.288465	hsa-miR-223
ILMN_3168401	0.284412	0.0749	-1.81491	-4.5213	-0.253136	hsa-miR-526b:9.1
ILMN_3167374	0.284412	0.0752	1.81332	-4.5239	0.402423	hsa-miR-26b
ILMN_3167512	0.284412	0.0753	-1.81286	-4.5247	-0.136311		HS_135
ILMN_3168915	0.284565	0.0757	1.81007	-4.5293	0.604815		solexa-826-1288
ILMN_3168024	0.284565	0.0758	1.80944	-4.5303	0.728183	hsa-miR-454*
ILMN_3168625	0.285388	0.0763	1.80647	-4.5352	0.349282	hsa-miR-374b
ILMN_3168054	0.287478	0.0771	-1.80137	-4.5435	-0.201555		HS_134
ILMN_3167581	0.287782	0.0776	-1.79838	-4.5484	-0.156656	hsa-miR-520a-3p
ILMN_3168842	0.287782	0.0777	-1.79744	-4.5499	-1.20195	hsa-miR-938
ILMN_3167227	0.287782	0.0781	1.79523	-4.5535	0.617989		solexa-3277-272
ILMN_3168368	0.287782	0.0782	-1.7946	-4.5546	-0.498136	hsa-miR-636
ILMN_3168540	0.289008	0.0788	-1.79098	-4.5605	-0.380432	hsa-miR-548c-5p
ILMN_3167939	0.291298	0.0796	-1.7856	-4.5692	-0.097947		HS_66
ILMN_3168765	0.292569	0.0805	1.7806	-4.5773	0.688914	hsa-miR-663b
ILMN_3168583	0.292569	0.0806	-1.77998	-4.5783	-0.216721	hsa-miR-105*
ILMN_3168316	0.292569	0.0807	1.77884	-4.5801	0.156101	hsa-let-7i
ILMN_3167959	0.293366	0.0812	-1.77598	-4.5848	-0.38812	hsa-miR-765
ILMN_3168564	0.299412	0.0832	-1.76448	-4.6033	-0.434242	hsa-miR-940
ILMN_3167740	0.299746	0.0835	-1.7624	-4.6066	-0.583439		HS_276.1
ILMN_3168601	0.301027	0.0841	-1.75877	-4.6124	-0.2656	hsa-miR-924
ILMN_3168768	0.301695	0.0848	1.7546	-4.6191	0.51256	hsa-miR-923
ILMN_3167989	0.301695	0.0849	1.75427	-4.6196	0.132336	hsa-miR-16
ILMN_3167224	0.301695	0.0851	1.75311	-4.6215	0.305581	hsa-miR-30d
ILMN_3167586	0.304973	0.0863	1.74627	-4.6324	0.628495		HS_241.1
ILMN_3167973	0.305214	0.0867	1.74385	-4.6362	0.638972	hsa-miR-433
ILMN_3167614	0.305214	0.0871	1.7418	-4.6395	0.466027	hsa-miR-451
ILMN_3168685	0.305214	0.0872	-1.74134	-4.6402	-0.366899	hsa-miR-1266
ILMN_3168639	0.307947	0.0882	-1.73543	-4.6496	-0.118543	hsa-miR-548n
ILMN_3167843	0.308595	0.0887	1.73261	-4.654	0.440658	hsa-miR-768-5p:11.0
ILMN_3168490	0.308595	0.0892	-1.73019	-4.6578	-0.624632	hsa-miR-619
ILMN_3167522	0.308595	0.0892	1.72989	-4.6583	0.707928	hsa-miR-154
ILMN_3168486	0.309689	0.0899	-1.72599	-4.6645	-0.422432	hsa-miR-621
ILMN_3168879	0.309689	0.0903	-1.72361	-4.6682	-0.334188	hsa-miR-450b-3p
ILMN_3167565	0.309689	0.0906	1.72237	-4.6702	0.646593	hsa-miR-20b
ILMN_3167745	0.309689	0.0913	-1.71866	-4.676	-0.375416	hsa-miR-188-5p
ILMN_3166984	0.309689	0.0913	-1.7186	-4.6761	-0.095398	hsa-miR-555
ILMN_3168781	0.309689	0.0913	-1.71815	-4.6768	-0.555259	hsa-miR-124
ILMN_3167484	0.309689	0.0916	-1.7165	-4.6794	-0.540899	hsa-miR-595
ILMN_3168875	0.309689	0.0917	1.71628	-4.6797	0.694767	hsa-miR-1300
ILMN_3168823	0.311291	0.0926	-1.7114	-4.6874	-0.570063	hsa-miR-1282
ILMN_3167827	0.311291	0.0927	-1.71078	-4.6883	-0.535631	hsa-miR-885-3p
ILMN_3167452	0.315136	0.0941	-1.70319	-4.7001	-0.3201	hsa-miR-617
ILMN_3167792	0.315446	0.0947	-1.70004	-4.705	-0.214821		HS_197
ILMN_3168835	0.315446	0.0948	-1.69976	-4.7055	-0.449694	hsa-miR-423-5p
ILMN_3168039	0.315446	0.095	-1.69833	-4.7077	-0.717083	hsa-miR-124a:9.1
ILMN_3166964	0.316885	0.0958	-1.6946	-4.7135	-0.169815		HS_95
ILMN_3166971	0.316975	0.0961	1.69301	-4.7159	0.590135	hsa-miR-95
ILMN_3168348	0.319243	0.097	1.68799	-4.7237	0.610326	hsa-miR-133b
ILMN_3168901	0.31949	0.0974	1.68616	-4.7265	0.626349		solexa-51-13984
ILMN_3167035	0.322576	0.0986	1.67988	-4.7362	0.469555	hsa-miR-29a
ILMN_3167699	0.322915	0.099	1.67791	-4.7392	0.644638	hsa-let-7b*
ILMN_3168412	0.322936	0.0993	1.67644	-4.7415	0.758256	hsa-miR-505
ILMN_3167504	0.324589	0.1	-1.67243	-4.7476	-0.469992		HS_86
ILMN_3167145	0.324998	0.1	-1.67036	-4.7508	-0.227903	hsa-miR-626
ILMN_3168844	0.325592	0.101	1.66801	-4.7544	0.795323	hsa-miR-24-1*
ILMN_3168858	0.325869	0.101	1.66616	-4.7572	0.469227	hsa-miR-23b*
ILMN_3168882	0.326157	0.102	-1.66429	-4.76	-0.580398	hsa-miR-1304
ILMN_3168863	0.326591	0.102	-1.6622	-4.7632	-0.175971	hsa-miR-933
ILMN_3167342	0.327364	0.103	-1.65958	-4.7672	-0.151482		HS_75.1
ILMN_3168043	0.331305	0.104	-1.65209	-4.7786	-0.303794	hsa-miR-520c-3p,hsa-miR-520f
ILMN_3168799	0.331825	0.105	1.64913	-4.783	0.349817	hsa-miR-411*
ILMN_3168661	0.331825	0.105	-1.64846	-4.784	-0.132181	hsa-miR-1265
ILMN_3168012	0.332911	0.106	1.64433	-4.7903	0.967344	hsa-miR-142-3p
ILMN_3167521	0.332911	0.106	1.64399	-4.7908	0.458155	hsa-miR-560:9.1
ILMN_3168678	0.335555	0.107	1.63813	-4.7996	0.572212	hsa-miR-935
ILMN_3167877	0.335555	0.107	-1.63714	-4.8011	-0.109926		HS_88
ILMN_3167770	0.337016	0.108	1.63145	-4.8096	0.404071	hsa-miR-616*
ILMN_3168292	0.337016	0.109	-1.63095	-4.8104	-0.316412	hsa-miR-453
ILMN_3167969	0.337016	0.109	1.63073	-4.8107	0.596118	hsa-miR-409-3p
ILMN_3167015	0.3401	0.11	-1.62467	-4.8198	-0.333957		HS_268
ILMN_3167807	0.3403	0.111	-1.61997	-4.8268	-0.350221	hsa-miR-661
ILMN_3168478	0.3403	0.111	1.61928	-4.8278	0.257213	hsa-miR-199a*:9.1
ILMN_3166985	0.3403	0.111	-1.61776	-4.83	-0.317808		HS_23
ILMN_3167533	0.3403	0.111	1.61766	-4.8302	0.162285		HS_174.1
ILMN_3168744	0.3403	0.112	-1.61651	-4.8319	-0.194635	hsa-miR-888*
ILMN_3168627	0.3403	0.112	1.61608	-4.8325	0.582214	hsa-miR-556-3p
ILMN_3167241	0.34205	0.113	-1.61198	-4.8386	-0.711216	hsa-miR-518b
ILMN_3167472	0.34205	0.113	-1.61069	-4.8405	-0.559733	hsa-miR-32
ILMN_3168349	0.342952	0.114	-1.60765	-4.845	-0.326854		HS_240
ILMN_3168806	0.342952	0.114	1.6066	-4.8466	0.44663	hsa-miR-128
ILMN_3168085	0.345498	0.115	1.59954	-4.857	0.613097	hsa-miR-128a:9.1
ILMN_3168289	0.345498	0.116	-1.59781	-4.8595	-0.312271	hsa-miR-625
ILMN_3167958	0.345498	0.116	-1.59759	-4.8598	-0.512837		HS_124
ILMN_3168862	0.345498	0.116	-1.59638	-4.8616	-0.274072	hsa-miR-1294
ILMN_3167037	0.345498	0.116	-1.59599	-4.8622	-0.314996		solexa-7509-112
ILMN_3168780	0.347896	0.118	-1.58965	-4.8715	-0.378479	hsa-miR-582-3p
ILMN_3167712	0.347896	0.118	-1.58896	-4.8725	-0.09481	hsa-miR-611
ILMN_3167328	0.347896	0.118	-1.58835	-4.8734	-0.369232	hsa-miR-524-3p
ILMN_3168818	0.348393	0.119	1.58455	-4.8789	0.491959	hsa-miR-1237
ILMN_3167127	0.348393	0.119	1.58358	-4.8803	0.250255	hsa-miR-181a
ILMN_3167200	0.348393	0.119	-1.58259	-4.8818	-0.181287	hsa-miR-802
ILMN_3168620	0.348393	0.119	-1.58226	-4.8822	-0.373577	hsa-miR-1258
ILMN_3167611	0.349003	0.12	1.58001	-4.8855	0.405866	hsa-miR-331-3p
ILMN_3167750	0.349461	0.12	-1.57745	-4.8892	-0.189542		HS_304_b
ILMN_3168563	0.349461	0.121	1.57346	-4.895	0.499754	hsa-miR-708
ILMN_3167184	0.349461	0.121	-1.5732	-4.8954	-0.353001	hsa-miR-372
ILMN_3168358	0.349461	0.121	-1.57287	-4.8959	-0.406456	hsa-miR-578
ILMN_3168769	0.349461	0.121	1.57271	-4.8961	0.571802	hsa-miR-1274a
ILMN_3167689	0.349708	0.122	1.57084	-4.8988	0.322958		HS_31.1
ILMN_3168499	0.349708	0.122	-1.56925	-4.9011	-0.248343	hsa-miR-518a-5p,hsa-miR-527
ILMN_3168323	0.349708	0.122	1.5684	-4.9023	0.429491	hsa-miR-27a
ILMN_3167956	0.350738	0.123	1.56483	-4.9075	0.633275	hsa-miR-323-3p
ILMN_3167994	0.350738	0.124	-1.56392	-4.9088	-0.225563		HS_119
ILMN_3168588	0.350738	0.124	1.56294	-4.9102	0.450533	hsa-miR-130b*
ILMN_3167087	0.350938	0.124	-1.55994	-4.9145	-0.247889		HS_177
ILMN_3167805	0.350938	0.125	1.55946	-4.9152	0.569766	hsa-miR-487b
ILMN_3168207	0.350938	0.125	-1.55874	-4.9162	-0.246958		HS_133.1
ILMN_3167509	0.351523	0.125	-1.55657	-4.9194	-0.193518	hsa-miR-363*
ILMN_3168849	0.351678	0.126	1.55504	-4.9215	0.267081	hsa-miR-1288
ILMN_3167474	0.354332	0.127	-1.54903	-4.9301	-0.238632	hsa-miR-302a*
ILMN_3167963	0.354332	0.127	1.54778	-4.9319	0.40657	hsa-miR-222
ILMN_3168796	0.354332	0.127	-1.54721	-4.9327	-0.208451	hsa-miR-300
ILMN_3168543	0.358203	0.129	-1.54017	-4.9428	-0.255485	hsa-miR-548l
ILMN_3166990	0.358819	0.13	-1.53676	-4.9476	-0.195801		HS_179
ILMN_3167733	0.358819	0.13	-1.53669	-4.9477	-0.313639		HS_194
ILMN_3167277	0.360171	0.131	-1.5334	-4.9524	-0.750434		HS_242
ILMN_3168463	0.360171	0.131	1.53213	-4.9541	0.216292	hsa-let-7e
ILMN_3168689	0.360354	0.132	-1.53059	-4.9563	-0.488502	hsa-miR-1184
ILMN_3168466	0.360475	0.132	1.52716	-4.9612	0.175131		HS_77
ILMN_3167407	0.360475	0.132	1.52698	-4.9614	0.75096	hsa-miR-675
ILMN_3168698	0.360475	0.133	1.5266	-4.962	0.393614	hsa-miR-486-3p
ILMN_3167595	0.363422	0.134	1.52098	-4.9699	0.193362		HS_278
ILMN_3168696	0.363794	0.134	-1.51917	-4.9724	-0.305258	hsa-miR-196a*
ILMN_3168030	0.364439	0.135	-1.51646	-4.9762	-0.486802	hsa-miR-144:9.1
ILMN_3168101	0.364439	0.135	-1.5157	-4.9773	-0.308466		HS_149
ILMN_3167245	0.369555	0.138	-1.50589	-4.9909	-0.36186	hsa-miR-592
ILMN_3168055	0.369555	0.138	1.5057	-4.9912	0.493127	hsa-miR-642
ILMN_3167975	0.369906	0.139	-1.50268	-4.9954	-0.219284		HS_285
ILMN_3168134	0.369906	0.139	-1.50267	-4.9954	-0.126406		HS_273
ILMN_3168008	0.371024	0.14	-1.49821	-5.0016	-0.18809	hsa-miR-659
ILMN_3167249	0.371024	0.14	-1.49739	-5.0027	-0.146389		HS_56
ILMN_3168018	0.371024	0.14	-1.49729	-5.0029	-0.236471	hsa-miR-934
ILMN_3168559	0.37182	0.141	-1.49489	-5.0062	-0.430366	hsa-miR-576-3p
ILMN_3167433	0.372185	0.141	1.49305	-5.0087	0.181407	hsa-miR-575
ILMN_3167088	0.372185	0.141	1.49187	-5.0104	0.671768	hsa-miR-663
ILMN_3167465	0.374066	0.142	-1.4879	-5.0158	-0.321118	hsa-miR-651
ILMN_3168523	0.374843	0.143	-1.48534	-5.0194	-0.29954		HS_126
ILMN_3167426	0.374843	0.143	1.48429	-5.0208	0.637717	hsa-miR-17-5p:9.1
ILMN_3168048	0.37579	0.144	-1.48169	-5.0244	-0.197925	hsa-miR-596
ILMN_3167670	0.377406	0.145	1.4776	-5.03	0.21075	hsa-miR-125a-5p
ILMN_3167977	0.377406	0.146	1.47594	-5.0322	0.352406	hsa-miR-498
ILMN_3168282	0.377406	0.146	1.47566	-5.0326	0.698303	hsa-miR-18a
ILMN_3168144	0.377948	0.146	-1.47364	-5.0354	-0.474333	hsa-miR-646
ILMN_3168421	0.377948	0.147	-1.47242	-5.037	-0.267674		HS_219
ILMN_3168457	0.380319	0.148	1.46767	-5.0435	0.176095	hsa-miR-484
ILMN_3167169	0.380319	0.148	-1.46656	-5.045	-0.27417		HS_127.1
ILMN_3168881	0.381523	0.149	-1.46361	-5.049	-0.422889	hsa-miR-1180
ILMN_3168864	0.382116	0.15	-1.46154	-5.0518	-0.251552	hsa-miR-1206
ILMN_3168272	0.383228	0.15	-1.45872	-5.0556	-0.214775	hsa-miR-544
ILMN_3167306	0.386218	0.152	-1.45288	-5.0635	-0.220794	hsa-miR-519e
ILMN_3167836	0.386218	0.152	-1.45081	-5.0663	-0.168506		HS_8
ILMN_3168084	0.386218	0.152	-1.45081	-5.0663	-0.376135		HS_269
ILMN_3167996	0.393535	0.156	1.43879	-5.0824	0.339473	hsa-miR-335
ILMN_3168337	0.393535	0.156	-1.43804	-5.0834	-0.258452	hsa-miR-488*
ILMN_3168099	0.39605	0.157	-1.43299	-5.0901	-0.267258		HS_113
ILMN_3168728	0.39605	0.158	1.43101	-5.0927	0.652373	hsa-miR-30c-1*
ILMN_3168811	0.39605	0.158	-1.43087	-5.0929	-0.171609	hsa-miR-1279
ILMN_3167049	0.396904	0.159	-1.42843	-5.0962	-0.293403		HS_153
ILMN_3168524	0.396904	0.159	-1.42726	-5.0977	-0.367382		HS_203
ILMN_3167532	0.397139	0.16	1.42573	-5.0997	0.366341	hsa-miR-492
ILMN_3168746	0.398308	0.16	-1.42289	-5.1035	-0.220809	hsa-miR-1272
ILMN_3168916	0.400511	0.162	-1.41809	-5.1098	-0.361842		solexa-8926-93
ILMN_3168771	0.400511	0.162	-1.41741	-5.1107	-0.531318	hsa-miR-1224-5p
ILMN_3166952	0.402249	0.163	-1.4124	-5.1173	-0.129472		HS_211
ILMN_3168558	0.402249	0.163	-1.41216	-5.1176	-0.605181	hsa-miR-483-5p
ILMN_3168651	0.402249	0.164	-1.4114	-5.1186	-0.114905	hsa-miR-1264
ILMN_3167510	0.407269	0.166	1.40327	-5.1292	0.255526	hsa-miR-20a
ILMN_3168607	0.407746	0.167	-1.40141	-5.1317	-0.26447	hsa-miR-1255a
ILMN_3167305	0.408617	0.167	1.39902	-5.1348	0.484644	hsa-miR-652
ILMN_3168247	0.410289	0.168	-1.39553	-5.1393	-0.257425	hsa-miR-643
ILMN_3168265	0.410341	0.169	-1.39248	-5.1433	-0.31091	hsa-miR-551a
ILMN_3168001	0.410341	0.17	-1.39161	-5.1444	-0.171118	hsa-miR-520a-5p
ILMN_3168827	0.410341	0.17	-1.39122	-5.1449	-0.217728	hsa-miR-1205
ILMN_3168854	0.410341	0.17	-1.39027	-5.1461	-0.239379	hsa-miR-1292
ILMN_3168291	0.410341	0.17	1.38951	-5.1471	0.579741	hsa-miR-582-5p
ILMN_3167755	0.411854	0.171	1.38625	-5.1513	0.293897	hsa-miR-182
ILMN_3167455	0.413587	0.172	1.3827	-5.1559	0.335012	hsa-miR-30a
ILMN_3167803	0.417642	0.174	-1.37599	-5.1645	-0.289525	hsa-miR-525-5p
ILMN_3168616	0.418461	0.176	1.37196	-5.1696	0.503994	hsa-miR-92a-1*
ILMN_3167801	0.418461	0.176	-1.3718	-5.1698	-0.209657	hsa-miR-200a
ILMN_3167500	0.418461	0.176	1.37021	-5.1719	0.166099	hsa-miR-608
ILMN_3167721	0.418461	0.177	1.36797	-5.1747	0.447541	hsa-miR-425
ILMN_3168308	0.418461	0.177	1.36689	-5.1761	0.437464	hsa-miR-196b
ILMN_3168635	0.418461	0.177	-1.36679	-5.1762	-0.280133	hsa-miR-135b*
ILMN_3168880	0.418461	0.177	1.36664	-5.1764	0.444276	hsa-miR-1303
ILMN_3168877	0.421042	0.179	-1.36197	-5.1823	-0.211942	hsa-miR-1178
ILMN_3168720	0.421474	0.179	-1.36021	-5.1846	-0.217561	hsa-miR-943
ILMN_3168507	0.422642	0.18	1.35746	-5.188	0.660535	hsa-miR-96
ILMN_3167691	0.423399	0.181	-1.35455	-5.1917	-0.561261	hsa-miR-33a
ILMN_3167854	0.423399	0.181	-1.3541	-5.1923	-0.219134		HS_168
ILMN_3168644	0.426448	0.184	-1.34675	-5.2015	-0.290443	hsa-miR-7-1*
ILMN_3167686	0.426448	0.184	1.34494	-5.2038	0.503152	hsa-miR-612
ILMN_3168305	0.426448	0.185	1.34196	-5.2075	0.514604		HS_156
ILMN_3167382	0.426448	0.185	1.34136	-5.2083	0.470984	hsa-miR-565:9.1
ILMN_3168739	0.426448	0.185	-1.34116	-5.2085	-0.274878	hsa-miR-30d*
ILMN_3167075	0.426448	0.185	1.34081	-5.209	0.111475	hsa-miR-520f
ILMN_3168034	0.426448	0.186	-1.34028	-5.2096	-0.268207	hsa-miR-631
ILMN_3166958	0.426448	0.186	1.33909	-5.2111	0.272719	hsa-miR-143
ILMN_3168324	0.426448	0.186	-1.33845	-5.2119	-0.437567	hsa-miR-550*
ILMN_3168845	0.426448	0.186	1.33841	-5.212	0.390908	hsa-miR-214*
ILMN_3167944	0.429025	0.188	1.33237	-5.2195	0.404888	hsa-miR-193b
ILMN_3167881	0.429025	0.188	1.33178	-5.2202	0.135312		HS_76
ILMN_3168687	0.429025	0.188	-1.33149	-5.2206	-0.169937	hsa-miR-146a*
ILMN_3168539	0.429838	0.189	-1.32877	-5.2239	-0.271657	hsa-miR-548j
ILMN_3167448	0.429838	0.19	1.32811	-5.2248	0.282568	hsa-miR-30b
ILMN_3168908	0.431298	0.191	1.32424	-5.2296	0.314167		solexa-6676-127
ILMN_3167223	0.431298	0.191	1.32385	-5.23	0.235132	hsa-miR-28-5p
ILMN_3167226	0.431298	0.191	1.32272	-5.2314	0.56913	hsa-miR-296-5p
ILMN_3167052	0.433748	0.193	1.3183	-5.2369	0.398018	hsa-miR-495
ILMN_3168373	0.434682	0.194	-1.31591	-5.2398	-0.276556	hsa-miR-518d-3p
ILMN_3168172	0.435784	0.194	1.3133	-5.243	0.463723	hsa-miR-29b
ILMN_3167132	0.437295	0.197	-1.30579	-5.2522	-0.383941	hsa-miR-517a,hsa-miR-517b
ILMN_3167711	0.437295	0.197	1.30523	-5.2529	0.135354	hsa-miR-30e*
ILMN_3168697	0.437295	0.197	-1.30508	-5.253	-0.467546	hsa-miR-1268
ILMN_3168787	0.437295	0.198	-1.30412	-5.2542	-0.172416	hsa-miR-1277
ILMN_3167684	0.437295	0.198	-1.30293	-5.2557	-0.223946		HS_170
ILMN_3168433	0.437295	0.198	-1.30292	-5.2557	-0.286595		HS_145.1
ILMN_3168332	0.437295	0.198	-1.30275	-5.2559	-0.28549		HS_205.1
ILMN_3167546	0.437295	0.198	1.30191	-5.2569	0.227279		HS_303_a
ILMN_3168187	0.437295	0.199	1.30057	-5.2585	0.304218	hsa-miR-450a
ILMN_3167742	0.437295	0.199	-1.29999	-5.2592	-0.1318		HS_162
ILMN_3168372	0.437894	0.2	-1.29807	-5.2616	-0.098263	hsa-miR-606
ILMN_3168213	0.438034	0.2	1.29676	-5.2632	0.190824	hsa-miR-99a
ILMN_3166993	0.440126	0.201	1.29263	-5.2682	0.730464	hsa-miR-551b
ILMN_3167646	0.440126	0.202	-1.2906	-5.2706	-0.238646	hsa-miR-548a-3p
ILMN_3167593	0.440126	0.202	1.29018	-5.2711	0.429779	hsa-miR-183*
ILMN_3168825	0.440126	0.203	-1.28871	-5.2729	-0.261432	hsa-miR-1284
ILMN_3167585	0.440126	0.203	1.28687	-5.2751	0.483955		HS_192.1
ILMN_3168509	0.440126	0.204	1.28622	-5.2759	0.803294	hsa-miR-142-5p
ILMN_3167394	0.440126	0.204	-1.28617	-5.2759	-0.415818	hsa-miR-564
ILMN_3167864	0.441561	0.205	1.28314	-5.2796	0.399826	hsa-miR-197
ILMN_3168114	0.444691	0.207	-1.27724	-5.2866	-0.220448	hsa-miR-516a-3p,hsa-miR-516b*
ILMN_3168911	0.444691	0.207	-1.27676	-5.2872	-0.215469		solexa-7534-111
ILMN_3168391	0.444896	0.207	1.27538	-5.2888	0.185965	hsa-miR-361-5p
ILMN_3168717	0.446133	0.208	-1.27254	-5.2922	-0.278963	hsa-miR-1200
ILMN_3167462	0.446133	0.209	1.27153	-5.2934	0.176184		HS_21
ILMN_3168576	0.446642	0.209	1.26975	-5.2955	0.096783	hsa-miR-199a-3p,hsa-miR-199b-3p
ILMN_3167355	0.449687	0.211	-1.26462	-5.3016	-0.307932	hsa-miR-216a
ILMN_3168632	0.452649	0.213	-1.25905	-5.3082	-0.33198	hsa-miR-1262
ILMN_3168216	0.452649	0.213	-1.25851	-5.3088	-0.40365	hsa-miR-760
ILMN_3168280	0.454304	0.215	1.25524	-5.3127	0.314107	hsa-miR-181c
ILMN_3168772	0.45471	0.215	-1.2536	-5.3146	-0.283152	hsa-miR-1226*
ILMN_3168743	0.457661	0.217	1.24864	-5.3204	0.290692	hsa-miR-625*
ILMN_3167441	0.458887	0.218	1.24594	-5.3236	0.437822	hsa-miR-192
ILMN_3167617	0.460908	0.22	-1.24121	-5.3291	-0.137127	hsa-miR-520b,hsa-miR-520c-3p,hsa-miR-520f
ILMN_3167612	0.460908	0.22	-1.24111	-5.3292	-0.32512		HS_144
ILMN_3168159	0.463665	0.222	-1.23643	-5.3346	-0.315817		HS_18
ILMN_3167773	0.465936	0.224	1.23091	-5.341	0.351919	hsa-miR-22
ILMN_3168262	0.465936	0.224	1.23067	-5.3413	0.396869	hsa-miR-99b
ILMN_3168545	0.465936	0.224	1.2302	-5.3418	0.302123	hsa-miR-543
ILMN_3168212	0.466273	0.224	1.22867	-5.3436	0.319969	hsa-miR-132
ILMN_3168010	0.469314	0.226	-1.22365	-5.3493	-0.090194		HS_70
ILMN_3167428	0.46957	0.227	-1.22223	-5.351	-0.168815	hsa-miR-607
ILMN_3167375	0.47067	0.228	1.21908	-5.3546	0.40618	hsa-miR-203
ILMN_3168712	0.47067	0.228	-1.21863	-5.3551	-0.219823	hsa-miR-222*
ILMN_3167523	0.47171	0.229	-1.2162	-5.3579	-0.538232	hsa-miR-219-5p
ILMN_3167590	0.472032	0.23	-1.2147	-5.3596	-0.178554		HS_91.1
ILMN_3168702	0.473947	0.231	1.21115	-5.3636	0.346835	hsa-miR-1227
ILMN_3167766	0.474395	0.232	-1.20949	-5.3655	-0.290455		HS_239
ILMN_3168353	0.477354	0.233	-1.20461	-5.371	-0.292669		HS_38.1
ILMN_3167491	0.477952	0.235	-1.20188	-5.3741	-0.274075	hsa-miR-128b:9.1
ILMN_3168812	0.477952	0.235	-1.20156	-5.3745	-0.168541	hsa-miR-1825
ILMN_3168105	0.477952	0.236	1.19867	-5.3777	0.178491	hsa-miR-148a
ILMN_3168555	0.477952	0.236	-1.19759	-5.3789	-0.432136	hsa-miR-181c*
ILMN_3167926	0.477952	0.236	-1.19736	-5.3792	-0.681995		HS_85.1
ILMN_3167136	0.477952	0.236	1.19734	-5.3792	0.566067	hsa-miR-140-5p
ILMN_3167976	0.483695	0.24	1.18895	-5.3886	0.295575	hsa-miR-199a-5p
ILMN_3167153	0.484032	0.24	-1.18717	-5.3906	-0.240921		HS_142.1
ILMN_3167315	0.484032	0.241	-1.18559	-5.3923	-0.203757	hsa-miR-649
ILMN_3168861	0.484032	0.241	-1.18528	-5.3927	-0.218095	hsa-miR-593
ILMN_3167951	0.490278	0.245	1.17571	-5.4033	0.244523		HS_116
ILMN_3168857	0.490278	0.245	-1.17522	-5.4038	-0.31107	hsa-miR-1293
ILMN_3167529	0.491869	0.246	1.17138	-5.4081	0.430576	hsa-miR-183
ILMN_3167905	0.491869	0.247	1.17106	-5.4084	0.468694	hsa-miR-326
ILMN_3167412	0.492665	0.247	1.16898	-5.4107	0.435626	hsa-miR-628-3p
ILMN_3168025	0.49791	0.251	1.16056	-5.4199	0.409675	hsa-miR-134
ILMN_3168774	0.49791	0.251	1.15904	-5.4216	0.422605	hsa-miR-1275
ILMN_3167053	0.49791	0.252	-1.15878	-5.4219	-0.38241	hsa-miR-671-3p
ILMN_3168609	0.49791	0.252	-1.15793	-5.4228	-0.2778	hsa-miR-25*
ILMN_3168276	0.49791	0.252	1.15703	-5.4238	0.228217		HS_254
ILMN_3168820	0.497962	0.254	1.15304	-5.4281	0.288724	hsa-miR-1281
ILMN_3168852	0.497962	0.254	-1.15205	-5.4292	-0.259914	hsa-miR-1207-5p
ILMN_3167802	0.497962	0.255	1.15038	-5.431	0.241995		HS_94
ILMN_3168111	0.497962	0.256	1.14893	-5.4325	0.411858	hsa-miR-376a
ILMN_3168344	0.497962	0.256	1.14851	-5.433	0.348211	hsa-miR-363
ILMN_3167014	0.497962	0.256	1.14793	-5.4336	0.139104	hsa-miR-518a-3p
ILMN_3166996	0.497962	0.256	-1.1476	-5.434	-0.240753	hsa-miR-571
ILMN_3168614	0.497962	0.256	1.14684	-5.4348	0.261664	hsa-miR-342-5p
ILMN_3167370	0.497962	0.257	-1.14637	-5.4353	-0.15029	hsa-miR-490-5p
ILMN_3166941	0.497962	0.257	1.1463	-5.4354	0.29977	hsa-miR-376c
ILMN_3167336	0.499699	0.258	-1.14295	-5.439	-0.123405	hsa-miR-637
ILMN_3168211	0.499699	0.26	1.13894	-5.4433	0.060208	hsa-miR-24
ILMN_3167624	0.499699	0.26	1.13892	-5.4433	0.508567	hsa-miR-136
ILMN_3168719	0.499699	0.26	1.13785	-5.4445	0.403704	hsa-miR-127-5p
ILMN_3168917	0.499699	0.26	1.1376	-5.4447	0.114596		solexa-9029-92
ILMN_3167767	0.499699	0.26	1.13727	-5.4451	0.244928		HS_45.1
ILMN_3168600	0.499699	0.261	-1.13557	-5.4469	-0.216912	hsa-miR-377*
ILMN_3168313	0.499699	0.261	1.13516	-5.4473	0.179283		HS_109
ILMN_3168773	0.499699	0.262	1.13361	-5.449	0.138977	hsa-miR-1202
ILMN_3168566	0.499699	0.262	-1.13357	-5.449	-0.462973	hsa-miR-1245
ILMN_3168453	0.500879	0.263	-1.12977	-5.4531	-0.297152		HS_9
ILMN_3167526	0.500879	0.264	-1.12958	-5.4533	-0.220108		HS_101
ILMN_3168593	0.500879	0.264	-1.12894	-5.454	-0.21674	hsa-miR-20b*
ILMN_3168570	0.501307	0.265	1.12689	-5.4561	0.48141	hsa-miR-501-3p
ILMN_3168382	0.501307	0.265	-1.12631	-5.4568	-0.316337		HS_33
ILMN_3167642	0.502279	0.266	1.1239	-5.4593	0.173458	hsa-miR-499-5p
ILMN_3168893	0.502279	0.267	-1.12217	-5.4611	-0.208618		solexa-3022-299
ILMN_3168605	0.502279	0.267	-1.12196	-5.4614	-0.314297	hsa-miR-1254
ILMN_3168695	0.503887	0.268	-1.11805	-5.4655	-0.199533	hsa-miR-1255b
ILMN_3168754	0.503887	0.268	-1.11785	-5.4657	-0.368759	hsa-miR-345
ILMN_3167408	0.504191	0.269	-1.11636	-5.4672	-0.19646	hsa-miR-563
ILMN_3168060	0.504191	0.269	1.11539	-5.4683	0.223885		HS_4.1
ILMN_3167146	0.50552	0.271	-1.11269	-5.4711	-0.159084	hsa-miR-593*
ILMN_3168618	0.505807	0.272	-1.11063	-5.4733	-0.230874	hsa-miR-1257
ILMN_3167074	0.505807	0.272	1.10957	-5.4744	0.474978	hsa-miR-542-3p
ILMN_3168665	0.505807	0.273	-1.10811	-5.4759	-0.046591	hsa-miR-301b
ILMN_3167447	0.505807	0.273	1.10785	-5.4762	0.528834	hsa-miR-9
ILMN_3167527	0.505807	0.273	-1.1065	-5.4776	-0.20913	hsa-miR-920
ILMN_3168713	0.505807	0.273	-1.10613	-5.478	-0.23328	hsa-miR-452*
ILMN_3167941	0.508436	0.275	-1.10179	-5.4825	-0.156841		HS_51
ILMN_3167332	0.509825	0.277	-1.09765	-5.4868	-0.120673		HS_146.1
ILMN_3168615	0.509825	0.277	-1.09677	-5.4877	-0.153532	hsa-miR-323-5p
ILMN_3166940	0.509825	0.278	-1.09653	-5.4879	-0.378415	hsa-miR-137
ILMN_3168785	0.509825	0.278	1.09593	-5.4885	0.290628	hsa-miR-590-3p
ILMN_3167116	0.511868	0.279	1.09234	-5.4922	0.214977	hsa-miR-302a
ILMN_3168604	0.513146	0.281	1.08971	-5.4949	0.376821	hsa-miR-1201
ILMN_3168737	0.513256	0.281	-1.08855	-5.4961	-0.658026	hsa-miR-1238
ILMN_3168149	0.513618	0.282	-1.08707	-5.4976	-0.178649		HS_110
ILMN_3168819	0.513942	0.282	1.08564	-5.4991	0.126805	hsa-miR-151-5p
ILMN_3168637	0.514244	0.283	1.08406	-5.5007	0.366486	hsa-miR-1826
ILMN_3168797	0.514244	0.283	-1.08322	-5.5016	-0.191981	hsa-miR-875-5p
ILMN_3168833	0.517258	0.287	-1.07613	-5.5088	-0.468228	hsa-miR-339-3p
ILMN_3168290	0.517258	0.287	1.07519	-5.5098	0.227336	hsa-miR-665
ILMN_3168281	0.517258	0.287	1.07433	-5.5106	0.478818	hsa-miR-941
ILMN_3168073	0.517258	0.288	1.07341	-5.5116	0.230315	hsa-miR-186
ILMN_3168175	0.517258	0.288	-1.07312	-5.5119	-0.1731	hsa-miR-545:9.1
ILMN_3167858	0.517258	0.288	-1.07212	-5.5129	-0.095144		HS_193
ILMN_3167616	0.517258	0.289	1.07137	-5.5136	0.486133		HS_29
ILMN_3168738	0.517258	0.289	1.0713	-5.5137	0.379956	hsa-miR-1271
ILMN_3168586	0.518399	0.29	-1.06886	-5.5162	-0.215691	hsa-miR-371-5p
ILMN_3167544	0.518871	0.29	1.06726	-5.5178	0.225735		HS_286_a
ILMN_3168235	0.521827	0.293	1.06113	-5.5239	0.297277		HS_169
ILMN_3168902	0.521827	0.294	1.05951	-5.5255	0.396361		solexa-5169-164
ILMN_3168895	0.521827	0.294	1.05853	-5.5265	0.403717		solexa-3126-285
ILMN_3168733	0.521827	0.295	1.05704	-5.528	0.185647	hsa-miR-744*
ILMN_3166945	0.521827	0.296	-1.05561	-5.5294	-0.154436		HS_43.1
ILMN_3168413	0.521827	0.296	1.05545	-5.5296	0.277343	hsa-miR-324-3p
ILMN_3168729	0.521827	0.297	-1.05306	-5.532	-0.171255	hsa-miR-30b*
ILMN_3167209	0.521827	0.297	1.05248	-5.5325	0.224476		HS_104
ILMN_3167698	0.521827	0.297	-1.05212	-5.5329	-0.369276	hsa-miR-184
ILMN_3167212	0.521827	0.297	-1.05201	-5.533	-0.32676		HS_260
ILMN_3167639	0.521827	0.298	-1.05135	-5.5337	-0.152365		HS_128
ILMN_3167371	0.521827	0.298	1.05068	-5.5343	0.048972	hsa-miR-21
ILMN_3167139	0.521827	0.298	-1.05047	-5.5345	-0.082011		HS_198
ILMN_3167080	0.524451	0.3	1.04551	-5.5394	0.20314		HS_64
ILMN_3167538	0.524451	0.301	-1.04459	-5.5404	-0.143065		HS_283_a
ILMN_3167652	0.524451	0.301	1.04404	-5.5409	0.384145	hsa-miR-452*:9.1
ILMN_3167061	0.524451	0.301	-1.04318	-5.5417	-0.185932		HS_7
ILMN_3168584	0.526304	0.303	-1.03987	-5.545	-0.285909	hsa-miR-125b-1*
ILMN_3168135	0.527054	0.304	1.03674	-5.5481	0.122039		HS_147
ILMN_3168795	0.527054	0.305	-1.03621	-5.5486	-0.214759	hsa-miR-1278
ILMN_3168691	0.527054	0.305	1.03508	-5.5497	0.420453	hsa-miR-26b*
ILMN_3168722	0.527054	0.305	-1.03494	-5.5498	-0.299039	hsa-miR-192*
ILMN_3167460	0.527478	0.306	1.03297	-5.5518	0.049013		HS_69
ILMN_3168801	0.527478	0.306	-1.03243	-5.5523	-0.397134	hsa-miR-654-3p
ILMN_3167503	0.527498	0.307	-1.03029	-5.5544	-0.239162	hsa-miR-609
ILMN_3168668	0.527498	0.308	1.02986	-5.5548	0.308927	hsa-miR-200b*
ILMN_3168362	0.527498	0.308	-1.02943	-5.5552	-0.176923		HS_122.1
ILMN_3168434	0.528554	0.309	-1.02711	-5.5575	-0.418681	hsa-miR-1468
ILMN_3168504	0.528628	0.309	-1.02602	-5.5585	-0.433818		HS_228.1
ILMN_3167047	0.528628	0.31	-1.02417	-5.5603	-0.182402		HS_139
ILMN_3168770	0.528628	0.31	-1.02369	-5.5608	-0.13859	hsa-miR-887
ILMN_3168612	0.528628	0.311	1.02307	-5.5614	0.298387	hsa-miR-27a*
ILMN_3168707	0.530546	0.312	-1.01968	-5.5646	-0.165916	hsa-miR-921
ILMN_3167214	0.531569	0.313	1.01721	-5.567	0.172842		HS_275
ILMN_3168896	0.531569	0.314	-1.01542	-5.5687	-0.078463		solexa-3464-254
ILMN_3167894	0.531569	0.314	1.01537	-5.5688	0.133639	hsa-miR-146b-5p
ILMN_3167343	0.531569	0.315	-1.01447	-5.5697	-0.211212		HS_183.1
ILMN_3167874	0.532006	0.315	1.01294	-5.5711	0.343853	hsa-miR-135b
ILMN_3168031	0.535909	0.318	1.00708	-5.5767	0.265845	hsa-miR-519e*
ILMN_3167736	0.540006	0.321	-1.001	-5.5825	-0.119819	hsa-miR-600
ILMN_3167823	0.540962	0.323	0.99793	-5.5854	0.535587	hsa-miR-135a
ILMN_3167865	0.540962	0.323	0.99784	-5.5855	0.302496	hsa-miR-106b
ILMN_3168395	0.544263	0.325	-0.99277	-5.5902	-0.149036	hsa-miR-605
ILMN_3167782	0.549424	0.329	-0.98438	-5.5981	-0.08791		HS_83.1
ILMN_3167979	0.549424	0.329	0.984	-5.5985	0.27328	hsa-miR-539
ILMN_3167268	0.549424	0.33	-0.9827	-5.5997	-0.186167	hsa-miR-557
ILMN_3168500	0.549424	0.33	-0.98239	-5.5999	-0.158551		HS_155
ILMN_3168641	0.549424	0.331	-0.98147	-5.6008	-0.197739	hsa-miR-548m
ILMN_3168792	0.549424	0.331	-0.98033	-5.6019	-0.290669	hsa-let-7c*
ILMN_3168622	0.549424	0.332	-0.97912	-5.603	-0.226026	hsa-miR-19b-1*
ILMN_3167643	0.549424	0.332	0.97854	-5.6035	0.308751	hsa-miR-29c
ILMN_3168663	0.550984	0.334	0.97468	-5.6071	0.094424	hsa-miR-1321
ILMN_3167579	0.550984	0.334	-0.97466	-5.6071	-0.230251		HS_282
ILMN_3168914	0.551861	0.335	0.97181	-5.6097	0.173837		solexa-8211-102
ILMN_3168859	0.551861	0.336	0.97082	-5.6106	0.318721	hsa-miR-629
ILMN_3168221	0.551861	0.336	-0.97065	-5.6108	-0.101601	hsa-miR-548c-3p
ILMN_3166943	0.554448	0.338	-0.96649	-5.6146	-0.200873	hsa-miR-585
ILMN_3168032	0.555664	0.34	0.96308	-5.6177	0.075541		HS_283_b
ILMN_3168501	0.555664	0.34	-0.96304	-5.6178	-0.124915		HS_30
ILMN_3168647	0.556298	0.341	-0.96128	-5.6194	-0.304952	hsa-miR-708*
ILMN_3167731	0.556498	0.341	0.96006	-5.6205	0.263938	hsa-miR-215
ILMN_3168072	0.558416	0.343	0.95673	-5.6235	0.236496	hsa-miR-548d-5p
ILMN_3167085	0.562085	0.346	-0.95126	-5.6284	-0.207346		HS_303_b
ILMN_3167388	0.565723	0.348	-0.94585	-5.6333	-0.198372		HS_27
ILMN_3168839	0.566633	0.35	-0.94333	-5.6356	-0.180094	hsa-miR-1286
ILMN_3167351	0.566633	0.35	0.94279	-5.6361	0.402155	hsa-miR-1296
ILMN_3167844	0.566826	0.35	-0.94158	-5.6371	-0.301397	hsa-miR-630
ILMN_3167800	0.568056	0.352	-0.93862	-5.6398	-0.12238		HS_140
ILMN_3168874	0.568056	0.352	-0.93771	-5.6406	-0.388793	hsa-miR-488
ILMN_3168638	0.568056	0.353	0.93702	-5.6412	0.316019	hsa-miR-424*
ILMN_3167219	0.568056	0.353	0.93618	-5.6419	0.306719	hsa-miR-891a
ILMN_3168905	0.57012	0.356	0.93129	-5.6463	0.255882		solexa-5620-151
ILMN_3167534	0.57012	0.356	0.9308	-5.6467	0.242384		HS_231
ILMN_3167759	0.57012	0.356	0.93075	-5.6467	0.249101	hsa-miR-614
ILMN_3167463	0.57157	0.357	0.92802	-5.6492	0.094009	hsa-miR-373
ILMN_3168550	0.57166	0.358	-0.92694	-5.6501	-0.320756	hsa-miR-216b
ILMN_3168560	0.573815	0.36	-0.92329	-5.6533	-0.403495	hsa-miR-1179
ILMN_3168065	0.573815	0.361	-0.92181	-5.6546	-0.105648		HS_89
ILMN_3166986	0.573815	0.361	0.92063	-5.6556	0.255983	hsa-miR-92a
ILMN_3168657	0.573815	0.362	0.9197	-5.6564	0.196959	hsa-miR-28-3p
ILMN_3168156	0.573815	0.362	0.91947	-5.6566	0.095455		HS_164
ILMN_3167264	0.573992	0.363	0.91765	-5.6582	0.255464	hsa-miR-624*
ILMN_3168748	0.573992	0.364	-0.91504	-5.6605	-0.108312	hsa-miR-922
ILMN_3168571	0.573992	0.364	0.91466	-5.6608	0.131176	hsa-miR-1246
ILMN_3167690	0.573992	0.364	0.91461	-5.6609	0.236784	hsa-miR-181d
ILMN_3167141	0.573992	0.365	-0.91396	-5.6614	-0.478162	hsa-miR-622
ILMN_3168759	0.573992	0.365	0.91307	-5.6622	0.31482	hsa-miR-505*
ILMN_3168793	0.573992	0.365	-0.91251	-5.6627	-0.084285	hsa-miR-548p
ILMN_3167553	0.575113	0.367	-0.91012	-5.6648	-0.199552	hsa-miR-491-5p
ILMN_3167594	0.575113	0.368	-0.90846	-5.6662	-0.227257	hsa-miR-662
ILMN_3168740	0.575113	0.368	0.90767	-5.6669	0.369502	hsa-miR-518f
ILMN_3168510	0.575113	0.368	-0.9073	-5.6672	-0.436798	hsa-miR-517c
ILMN_3167884	0.575265	0.369	-0.90615	-5.6682	-0.112799	hsa-miR-518e:9.1
ILMN_3168630	0.575885	0.37	0.90444	-5.6696	0.2754	hsa-miR-628-5p
ILMN_3167191	0.577505	0.371	0.9015	-5.6722	0.132044	hsa-miR-195
ILMN_3168301	0.578351	0.372	0.89951	-5.6739	0.265064	hsa-miR-339-5p
ILMN_3168241	0.58266	0.376	-0.89331	-5.6791	-0.128289	hsa-miR-1185
ILMN_3167497	0.587864	0.379	-0.88605	-5.6853	-0.099546		HS_26.1
ILMN_3168366	0.589405	0.381	0.88323	-5.6876	0.174687	hsa-miR-193a-3p
ILMN_3168556	0.589917	0.382	-0.88165	-5.689	-0.119155	hsa-miR-122*
ILMN_3167656	0.590451	0.383	0.87903	-5.6912	0.123631	hsa-miR-574-3p
ILMN_3168762	0.590451	0.383	0.87893	-5.6912	0.172022	hsa-miR-23a*
ILMN_3168890	0.590451	0.384	-0.87805	-5.692	-0.428849		solexa-2580-353
ILMN_3167744	0.590451	0.384	-0.87716	-5.6927	-0.119067		HS_25
ILMN_3168876	0.594055	0.387	-0.87111	-5.6977	-0.190683	hsa-miR-1301
ILMN_3168335	0.594055	0.388	0.86996	-5.6987	0.147898		HS_221
ILMN_3168129	0.594055	0.388	-0.86942	-5.6991	-0.100775	hsa-miR-517*
ILMN_3168726	0.594055	0.389	-0.86898	-5.6995	-0.223939	hsa-miR-1270
ILMN_3167776	0.595242	0.39	0.86659	-5.7015	0.137585		HS_53
ILMN_3168791	0.595466	0.391	-0.86537	-5.7025	-0.17676	hsa-miR-890
ILMN_3167304	0.59732	0.393	0.86129	-5.7058	0.097314		HS_1
ILMN_3168215	0.59732	0.394	-0.85967	-5.7071	-0.402099	hsa-miR-521
ILMN_3167440	0.59732	0.394	-0.85956	-5.7072	-0.068862		HS_67
ILMN_3167416	0.59732	0.394	-0.85875	-5.7079	-0.128997		HS_73.1
ILMN_3168268	0.59732	0.394	-0.85836	-5.7082	-0.327248		HS_287
ILMN_3168710	0.597642	0.395	0.85684	-5.7095	0.371984	hsa-let-7d*
ILMN_3168732	0.597642	0.396	-0.85606	-5.7101	-0.280087	hsa-let-7g*
ILMN_3167634	0.599674	0.398	0.85266	-5.7128	0.128098	hsa-miR-100
ILMN_3167813	0.602303	0.4	-0.84854	-5.7162	-0.052262		HS_61
ILMN_3167175	0.603091	0.401	0.84664	-5.7177	0.344162	hsa-miR-542-5p
ILMN_3167198	0.603459	0.402	-0.84524	-5.7188	-0.225666	hsa-miR-647
ILMN_3168225	0.603459	0.402	-0.84429	-5.7196	-0.178055	hsa-miR-583
ILMN_3167914	0.604083	0.403	0.84259	-5.721	0.074262	hsa-miR-422a
ILMN_3167753	0.604874	0.404	-0.84069	-5.7225	-0.069909	hsa-miR-520d:9.1
ILMN_3167702	0.605928	0.406	-0.83782	-5.7248	-0.15531	hsa-miR-345:9.1
ILMN_3168680	0.605928	0.406	-0.83752	-5.725	-0.125169	hsa-miR-1203
ILMN_3168611	0.607673	0.408	-0.83405	-5.7278	-0.093217	hsa-miR-149*
ILMN_3167039	0.607673	0.408	-0.83349	-5.7282	-0.150854	hsa-miR-568
ILMN_3168562	0.607673	0.409	-0.83238	-5.7291	-0.301895	hsa-miR-129*
ILMN_3167276	0.607673	0.409	0.83163	-5.7297	0.172107	hsa-miR-10b
ILMN_3168107	0.608106	0.41	-0.83016	-5.7309	-0.220568	hsa-miR-106a:9.1
ILMN_3167678	0.614417	0.415	-0.82125	-5.7379	-0.061391		HS_159
ILMN_3168753	0.614417	0.415	-0.82069	-5.7383	-0.116241	hsa-miR-138-2*
ILMN_3168585	0.615578	0.417	-0.81749	-5.7408	-0.116346	hsa-miR-1250
ILMN_3167606	0.615578	0.417	0.8174	-5.7409	0.414339	hsa-miR-801:9.1
ILMN_3167848	0.617405	0.419	-0.81427	-5.7433	-0.296677	hsa-miR-603
ILMN_3166938	0.61753	0.42	0.81224	-5.7449	0.147836	hsa-miR-424
ILMN_3168435	0.61753	0.42	0.81222	-5.7449	0.14188		HS_175
ILMN_3167882	0.617669	0.421	0.81023	-5.7464	0.087835		HS_50
ILMN_3168423	0.617669	0.421	0.81016	-5.7465	0.179905	hsa-miR-558
ILMN_3168171	0.620301	0.424	-0.80607	-5.7496	-0.176544		HS_40
ILMN_3167389	0.621387	0.425	-0.80364	-5.7515	-0.156652		HS_82.1
ILMN_3167545	0.621387	0.426	-0.80115	-5.7534	-0.099386		HS_115
ILMN_3167272	0.621387	0.427	0.80072	-5.7537	0.153083	hsa-miR-489
ILMN_3168688	0.621387	0.427	-0.80052	-5.7539	-0.21856	hsa-miR-1236
ILMN_3167461	0.621387	0.428	0.79925	-5.7548	0.161386	hsa-miR-720
ILMN_3167356	0.621387	0.428	-0.79909	-5.7549	-0.114959		HS_15.1
ILMN_3167178	0.621485	0.428	-0.79803	-5.7557	-0.272591	hsa-miR-18a*
ILMN_3168019	0.624146	0.431	-0.7939	-5.7589	-0.380628	hsa-miR-206
ILMN_3168807	0.627172	0.433	0.78935	-5.7623	0.240311	hsa-miR-1226
ILMN_3167429	0.633787	0.439	-0.78034	-5.769	-0.183605		HS_99.1
ILMN_3167890	0.633787	0.439	0.77959	-5.7696	0.090375		HS_100
ILMN_3167768	0.63429	0.44	0.77804	-5.7707	0.160092	hsa-miR-618
ILMN_3167194	0.634664	0.441	-0.77665	-5.7718	-0.266356	hsa-miR-9*
ILMN_3167883	0.636184	0.442	0.7739	-5.7738	0.088322	hsa-miR-588
ILMN_3167182	0.636487	0.443	-0.7726	-5.7748	-0.235769	hsa-miR-518c
ILMN_3167260	0.636701	0.444	0.7714	-5.7757	0.253706	hsa-miR-19b
ILMN_3168389	0.642116	0.449	0.76332	-5.7816	0.079119	hsa-miR-125b
ILMN_3168752	0.642116	0.449	-0.76309	-5.7817	-0.24404	hsa-miR-138-1*
ILMN_3167439	0.643393	0.45	-0.76064	-5.7835	-0.153511	hsa-miR-589*
ILMN_3168481	0.643619	0.451	-0.75887	-5.7848	-0.251131	hsa-miR-377
ILMN_3168549	0.643619	0.452	-0.7577	-5.7856	-0.196199	hsa-miR-148a*
ILMN_3167344	0.643619	0.452	0.7572	-5.786	0.403134	hsa-miR-338-3p
ILMN_3168815	0.643619	0.453	0.75658	-5.7864	0.23039	hsa-miR-361-3p
ILMN_3168567	0.644382	0.454	-0.75473	-5.7878	-0.276275	hsa-miR-148b*
ILMN_3168561	0.646417	0.456	0.75066	-5.7907	0.292821	hsa-miR-129-3p
ILMN_3168903	0.646417	0.456	0.75044	-5.7909	0.171485		solexa-539-2056
ILMN_3167709	0.648641	0.458	-0.74687	-5.7934	-0.110197	hsa-miR-526b*
ILMN_3168619	0.649204	0.459	-0.74526	-5.7946	-0.277432	hsa-miR-550
ILMN_3167659	0.649246	0.46	-0.74362	-5.7957	-0.218598	hsa-miR-1537
ILMN_3167027	0.649246	0.46	0.74332	-5.7959	0.120058	hsa-miR-103
ILMN_3168831	0.653881	0.464	0.73691	-5.8005	0.29463	hsa-miR-589
ILMN_3168103	0.654424	0.465	-0.73532	-5.8016	-0.163403	hsa-miR-189:9.1
ILMN_3168747	0.655165	0.466	-0.73324	-5.803	-0.120294	hsa-miR-1322
ILMN_3167743	0.655165	0.468	-0.73141	-5.8043	-0.330041	hsa-miR-34c-5p
ILMN_3167196	0.655165	0.468	0.73122	-5.8044	0.225651	hsa-miR-204
ILMN_3167151	0.655165	0.469	0.72957	-5.8056	0.099222	hsa-miR-553
ILMN_3167099	0.655165	0.47	0.72825	-5.8065	0.189746	hsa-miR-130b
ILMN_3167403	0.655165	0.47	0.7279	-5.8068	0.108208	hsa-miR-320d,hsa-miR-320b,hsa-miR-320a,hsa-miR-320c
ILMN_3168049	0.655165	0.47	-0.72784	-5.8068	-0.315666	hsa-miR-296-3p
ILMN_3168252	0.662846	0.476	0.71785	-5.8137	0.088784	hsa-miR-516b
ILMN_3167451	0.669219	0.481	-0.70916	-5.8196	-0.471983	hsa-miR-449a
ILMN_3167893	0.669219	0.482	0.7085	-5.82	0.1755	hsa-miR-767-3p
ILMN_3167685	0.672831	0.485	0.70333	-5.8235	0.146227	hsa-miR-139-3p
ILMN_3168677	0.679649	0.491	-0.69379	-5.8299	-0.128145	hsa-miR-194*
ILMN_3168804	0.679649	0.491	0.6935	-5.8301	0.220373	hsa-miR-125b-2*
ILMN_3168591	0.680657	0.492	-0.69137	-5.8315	-0.232536	hsa-miR-93*
ILMN_3168711	0.683088	0.495	0.68679	-5.8345	0.159282	hsa-let-7e*
ILMN_3168648	0.683088	0.496	-0.68474	-5.8359	-0.144402	hsa-miR-99a*
ILMN_3168217	0.683088	0.497	0.68403	-5.8363	0.250754		HS_206
ILMN_3168899	0.683088	0.497	0.6838	-5.8365	0.185394		solexa-4793-177
ILMN_3168883	0.683088	0.497	-0.68379	-5.8365	-0.131972	hsa-miR-1305
ILMN_3168350	0.683808	0.499	0.68109	-5.8382	0.055838	hsa-miR-520g
ILMN_3168598	0.683808	0.499	-0.68105	-5.8383	-0.081639	hsa-miR-1253
ILMN_3168429	0.684441	0.5	0.67875	-5.8398	0.183897	hsa-miR-34a
ILMN_3167794	0.684441	0.5	-0.67841	-5.84	-0.097939	hsa-miR-432*
ILMN_3168063	0.685786	0.502	-0.67588	-5.8416	-0.203467		HS_182.1
ILMN_3168682	0.685786	0.503	0.67468	-5.8424	0.285613	hsa-miR-1181
ILMN_3168817	0.685786	0.503	-0.674	-5.8428	-0.220975	hsa-miR-877*
ILMN_3167470	0.686173	0.505	0.67155	-5.8444	0.210954		HS_151.1
ILMN_3168624	0.686173	0.505	-0.67122	-5.8446	-0.150674	hsa-miR-19a*
ILMN_3168814	0.686173	0.506	-0.67007	-5.8453	-0.136783	hsa-miR-1280
ILMN_3167164	0.686173	0.506	0.66968	-5.8456	0.137621	hsa-miR-371-3p
ILMN_3168634	0.686173	0.506	0.66881	-5.8462	0.124223	hsa-miR-218-1*
ILMN_3168066	0.689045	0.509	-0.66452	-5.8489	-0.075527	hsa-miR-581
ILMN_3168284	0.693832	0.514	0.65753	-5.8533	0.058551	hsa-miR-524-5p
ILMN_3168897	0.693832	0.514	0.6569	-5.8537	0.14383		solexa-3695-237
ILMN_3166999	0.693832	0.515	-0.65583	-5.8544	-0.281828	hsa-miR-153
ILMN_3167948	0.693832	0.515	-0.65516	-5.8548	-0.265678	hsa-miR-18b
ILMN_3168636	0.694461	0.516	-0.65348	-5.8558	-0.109292	hsa-miR-297
ILMN_3168640	0.694582	0.517	-0.65239	-5.8565	-0.173282	hsa-miR-497*
ILMN_3168093	0.695076	0.518	-0.65087	-5.8575	-0.16932		HS_184
ILMN_3168645	0.697876	0.521	-0.64667	-5.8601	-0.145987	hsa-miR-7-2*
ILMN_3167185	0.699314	0.522	0.64405	-5.8617	0.222205	hsa-miR-629*
ILMN_3167038	0.699786	0.523	0.64256	-5.8626	0.219744	hsa-miR-766
ILMN_3168257	0.701044	0.525	0.64015	-5.8641	0.107981	hsa-miR-181b
ILMN_3168805	0.703435	0.527	0.63643	-5.8664	0.150784	hsa-miR-1228
ILMN_3168538	0.70468	0.529	-0.63369	-5.868	-0.12742	hsa-miR-548i
ILMN_3167868	0.70468	0.53	0.63239	-5.8688	0.056889		HS_154
ILMN_3168741	0.70468	0.53	-0.63214	-5.869	-0.09963	hsa-miR-551b*
ILMN_3168656	0.705157	0.531	-0.63063	-5.8699	-0.124225	hsa-miR-624
ILMN_3168735	0.706101	0.532	0.62859	-5.8711	0.13517	hsa-miR-374a*
ILMN_3168788	0.708354	0.535	-0.62503	-5.8732	-0.153897	hsa-miR-888
ILMN_3168660	0.709761	0.536	-0.62245	-5.8748	-0.057777	hsa-miR-892a
ILMN_3168681	0.713279	0.539	0.61743	-5.8777	0.181966	hsa-miR-106b*
ILMN_3167804	0.718386	0.544	0.61034	-5.8819	0.127267	hsa-miR-604
ILMN_3166995	0.718386	0.545	-0.60963	-5.8823	-0.065158		HS_215
ILMN_3166967	0.719235	0.546	-0.6077	-5.8835	-0.21865		HS_196.1
ILMN_3167915	0.719415	0.547	-0.60574	-5.8846	-0.179058	hsa-miR-376b
ILMN_3168233	0.719415	0.548	-0.60466	-5.8852	-0.120472		HS_152
ILMN_3168410	0.719415	0.548	0.60463	-5.8852	0.243901	hsa-miR-425*
ILMN_3167031	0.71953	0.549	-0.60276	-5.8863	-0.184937	hsa-miR-127-3p
ILMN_3168477	0.71953	0.55	0.60213	-5.8867	0.138316	hsa-miR-381
ILMN_3167853	0.71953	0.55	-0.60078	-5.8875	-0.101465	hsa-miR-1233
ILMN_3167450	0.71953	0.55	-0.6007	-5.8875	-0.233157	hsa-miR-380
ILMN_3166969	0.733207	0.562	0.58386	-5.897	0.102569	hsa-miR-324-5p
ILMN_3168810	0.733207	0.562	-0.58304	-5.8975	-0.105538	hsa-miR-545*
ILMN_3168196	0.734206	0.564	-0.58093	-5.8987	-0.285936	hsa-miR-101*
ILMN_3167179	0.734625	0.565	0.57949	-5.8995	0.188344	hsa-miR-200a*
ILMN_3168590	0.735742	0.566	-0.57725	-5.9007	-0.245656	hsa-miR-20a*
ILMN_3168417	0.7381	0.569	-0.57359	-5.9027	-0.100754	hsa-miR-517a
ILMN_3168675	0.738882	0.57	-0.57173	-5.9038	-0.110069	hsa-miR-1324
ILMN_3167774	0.739657	0.571	0.56989	-5.9048	0.167955	hsa-miR-210
ILMN_3167362	0.74423	0.575	-0.56369	-5.9081	-0.099963	hsa-miR-512-3p
ILMN_3168198	0.744391	0.577	0.56098	-5.9096	0.255306	hsa-miR-328
ILMN_3168511	0.744391	0.577	0.56096	-5.9096	0.070585	hsa-miR-635
ILMN_3168751	0.744391	0.577	-0.56063	-5.9098	-0.114283	hsa-miR-186*
ILMN_3168764	0.744657	0.579	0.55858	-5.9109	0.095588	hsa-miR-143*
ILMN_3167970	0.744657	0.579	0.5584	-5.911	0.073274	hsa-let-7b
ILMN_3168161	0.745481	0.58	0.5565	-5.912	0.085125		HS_72
ILMN_3167592	0.747475	0.582	-0.55325	-5.9137	-0.102188		HS_2
ILMN_3168052	0.751428	0.586	-0.54777	-5.9166	-0.101404		HS_250
ILMN_3167790	0.751952	0.587	-0.54621	-5.9174	-0.078987		HS_48.1
ILMN_3167210	0.752149	0.588	-0.54502	-5.918	-0.114365	hsa-miR-502-5p
ILMN_3168122	0.753617	0.59	0.54238	-5.9194	0.215615		HS_24
ILMN_3167937	0.7545	0.592	-0.53867	-5.9213	-0.080995	hsa-miR-519c-3p
ILMN_3168228	0.7545	0.592	-0.5385	-5.9214	-0.070042	hsa-miR-448
ILMN_3167952	0.7545	0.593	-0.538	-5.9217	-0.112733		HS_150
ILMN_3167057	0.7545	0.593	0.53752	-5.9219	0.234799		HS_108.1
ILMN_3167681	0.754531	0.594	0.53563	-5.9229	0.054035	hsa-miR-221
ILMN_3168763	0.754531	0.594	-0.53557	-5.9229	-0.063436	hsa-miR-92a-2*
ILMN_3168595	0.754714	0.595	-0.5344	-5.9235	-0.074683	hsa-miR-302d*
ILMN_3168582	0.755615	0.597	0.5324	-5.9246	0.137038	hsa-miR-1249
ILMN_3168315	0.75665	0.599	-0.52948	-5.9261	-0.100715		HS_166.1
ILMN_3168597	0.75665	0.599	-0.52883	-5.9264	-0.060621	hsa-miR-219-2-3p
ILMN_3167366	0.75665	0.599	0.52834	-5.9266	0.253749	hsa-miR-362-5p
ILMN_3167353	0.758849	0.602	0.52485	-5.9284	0.194849	hsa-miR-107
ILMN_3168701	0.759126	0.603	-0.52357	-5.929	-0.213647	hsa-miR-200c*
ILMN_3168132	0.763383	0.607	0.51773	-5.932	0.127026		HS_17
ILMN_3168116	0.7637	0.608	-0.5164	-5.9326	-0.164023	hsa-miR-301a
ILMN_3168361	0.772156	0.615	0.50576	-5.9378	0.108139	hsa-miR-181a*
ILMN_3168826	0.772363	0.617	-0.50358	-5.9389	-0.165285	hsa-miR-330-5p
ILMN_3168731	0.772363	0.617	0.50274	-5.9393	0.175813	hsa-miR-29b-2*
ILMN_3168919	0.772363	0.617	-0.50235	-5.9395	-0.097156		solexa-9578-86
ILMN_3168173	0.772363	0.618	0.50155	-5.9399	0.245973	hsa-miR-483-3p
ILMN_3168497	0.772363	0.619	-0.5007	-5.9403	-0.074287	hsa-miR-130a
ILMN_3168013	0.772625	0.619	-0.49943	-5.9409	-0.106705		HS_252.1
ILMN_3168898	0.773151	0.621	0.4975	-5.9418	0.118595		solexa-3793-229
ILMN_3168886	0.773151	0.622	0.49631	-5.9424	0.228076		solexa-1460-671
ILMN_3168036	0.773151	0.622	-0.49594	-5.9425	-0.088027		HS_90
ILMN_3167228	0.779571	0.628	0.48762	-5.9465	0.177926		solexa-9081-91
ILMN_3168192	0.780324	0.629	-0.48579	-5.9473	-0.082372	hsa-miR-144
ILMN_3167051	0.783065	0.632	-0.48151	-5.9493	-0.04283		HS_258
ILMN_3168628	0.783065	0.633	0.47992	-5.95	0.094045	hsa-miR-1260
ILMN_3168047	0.783065	0.633	0.47974	-5.9501	0.071006		HS_3
ILMN_3167404	0.783065	0.634	0.47878	-5.9506	0.083411		HS_55.1
ILMN_3167666	0.783481	0.635	0.47696	-5.9514	0.089027	hsa-miR-220a
ILMN_3168653	0.783481	0.636	0.47613	-5.9518	0.218143	hsa-miR-34a*
ILMN_3168664	0.783481	0.636	0.4754	-5.9521	0.077255	hsa-miR-431*
ILMN_3167193	0.784313	0.638	-0.47348	-5.953	-0.134464	hsa-miR-610
ILMN_3168541	0.786004	0.64	0.47058	-5.9543	0.0727	hsa-miR-548b-5p
ILMN_3167547	0.792733	0.646	-0.4619	-5.9582	-0.140341	hsa-miR-122
ILMN_3167337	0.794921	0.648	-0.45843	-5.9597	-0.145558	hsa-miR-1229
ILMN_3168476	0.798801	0.652	-0.45276	-5.9622	-0.058907	hsa-miR-25
ILMN_3167252	0.798801	0.653	0.45205	-5.9625	0.074614	hsa-miR-768-3p:11.0
ILMN_3168725	0.80259	0.657	-0.44675	-5.9648	-0.209651	hsa-miR-1269
ILMN_3168838	0.80391	0.659	-0.44343	-5.9662	-0.01878	hsa-miR-891b
ILMN_3167006	0.80391	0.66	0.44218	-5.9667	0.133544	hsa-miR-378
ILMN_3167062	0.80391	0.661	0.44139	-5.9671	0.082016	hsa-miR-151:9.1
ILMN_3167058	0.80391	0.661	-0.44134	-5.9671	-0.092088		HS_37
ILMN_3167478	0.806154	0.663	0.4378	-5.9686	0.087395	hsa-miR-217
ILMN_3168867	0.807811	0.666	-0.43366	-5.9703	-0.095219	hsa-miR-1297
ILMN_3167253	0.807811	0.667	0.43195	-5.971	0.060444	hsa-miR-191
ILMN_3168760	0.807811	0.668	-0.43119	-5.9713	-0.303489	hsa-miR-1273
ILMN_3167485	0.807811	0.668	-0.43114	-5.9714	-0.028408	hsa-miR-640
ILMN_3167907	0.807811	0.668	-0.43087	-5.9715	-0.083044		HS_208
ILMN_3167406	0.807811	0.669	0.42999	-5.9718	0.151999	hsa-miR-577
ILMN_3167508	0.807811	0.67	0.42907	-5.9722	0.051962	hsa-miR-615-3p
ILMN_3168473	0.80884	0.672	-0.42613	-5.9734	-0.060613	hsa-miR-412
ILMN_3166944	0.80884	0.672	-0.42566	-5.9736	-0.07673	hsa-miR-302c
ILMN_3168724	0.80884	0.673	0.42497	-5.9739	0.222331	hsa-let-7i*
ILMN_3168669	0.811847	0.676	-0.42015	-5.9759	-0.146651	hsa-miR-141*
ILMN_3168577	0.811847	0.676	0.41957	-5.9761	0.091414	hsa-miR-181a-2*
ILMN_3168692	0.812608	0.678	-0.41772	-5.9768	-0.071226	hsa-miR-1267
ILMN_3166959	0.813158	0.681	-0.41372	-5.9784	-0.128722	hsa-miR-515-5p
ILMN_3167310	0.813158	0.681	-0.41307	-5.9787	-0.043145		HS_63
ILMN_3167741	0.813158	0.681	-0.41306	-5.9787	-0.170558	hsa-miR-654-5p
ILMN_3168873	0.813158	0.682	0.41255	-5.9789	0.112758	hsa-miR-1299
ILMN_3167041	0.813158	0.682	-0.41221	-5.979	-0.067265		HS_195
ILMN_3168742	0.813742	0.683	-0.41056	-5.9797	-0.194218	hsa-miR-337-5p
ILMN_3167392	0.813874	0.684	0.40936	-5.9802	0.123796	hsa-miR-532-5p
ILMN_3168836	0.813874	0.685	-0.40846	-5.9805	-0.105427	hsa-miR-574-5p
ILMN_3167675	0.815168	0.686	-0.406	-5.9815	-0.104425	hsa-miR-1231
ILMN_3168552	0.818232	0.69	-0.40149	-5.9832	-0.076983	hsa-miR-338-5p
ILMN_3168430	0.818809	0.691	-0.39985	-5.9839	-0.037717	hsa-miR-587
ILMN_3168551	0.818913	0.692	0.39875	-5.9843	0.126702	hsa-miR-944
ILMN_3168569	0.81986	0.693	0.39642	-5.9852	0.077867	hsa-miR-96*
ILMN_3168544	0.81986	0.694	0.39491	-5.9857	0.085022	hsa-miR-106a
ILMN_3168699	0.81986	0.695	0.39473	-5.9858	0.105111	hsa-miR-193b*
ILMN_3168102	0.820889	0.696	-0.39257	-5.9866	-0.08612	hsa-miR-502-3p,hsa-miR-500*
ILMN_3168920	0.823852	0.7	-0.38793	-5.9884	-0.078751		solexa-9655-85
ILMN_3167655	0.823852	0.7	-0.38719	-5.9886	-0.086919	hsa-miR-556-5p
ILMN_3168180	0.827385	0.704	-0.38183	-5.9906	-0.139332	hsa-miR-378*
ILMN_3167289	0.827385	0.705	-0.38116	-5.9909	-0.03762		HS_74
ILMN_3167723	0.829052	0.707	-0.37825	-5.9919	-0.092081		HS_68
ILMN_3168208	0.829979	0.708	0.3761	-5.9927	0.110084	hsa-miR-330-3p
ILMN_3167830	0.829979	0.709	-0.37522	-5.993	-0.093756		HS_79.1
ILMN_3168153	0.830584	0.711	0.37298	-5.9938	0.083244		HS_97
ILMN_3168553	0.830584	0.711	-0.37256	-5.994	-0.08828	hsa-miR-362-3p
ILMN_3168169	0.83726	0.718	0.36341	-5.9972	0.078629		HS_280_b
ILMN_3167202	0.83726	0.718	0.36289	-5.9974	0.044947		HS_280_a
ILMN_3168404	0.837517	0.719	-0.36123	-5.998	-0.039867	hsa-miR-337:9.1
ILMN_3168706	0.837517	0.72	-0.36062	-5.9982	-0.088238	hsa-miR-331-5p
ILMN_3167137	0.83905	0.722	-0.35786	-5.9991	-0.048101	hsa-miR-567
ILMN_3168642	0.844276	0.727	0.35084	-6.0015	0.050665	hsa-miR-17
ILMN_3167640	0.847995	0.731	-0.34556	-6.0033	-0.028364		HS_204.1
ILMN_3168250	0.849111	0.733	0.34328	-6.0041	0.128258	hsa-miR-876-3p
ILMN_3167297	0.850482	0.735	-0.34071	-6.0049	-0.141119		HS_176
ILMN_3167479	0.854098	0.739	-0.33533	-6.0067	-0.081193		HS_81
ILMN_3168783	0.854098	0.74	0.33371	-6.0072	0.087711	hsa-miR-500
ILMN_3168860	0.854098	0.74	0.33356	-6.0072	0.055122	hsa-miR-541
ILMN_3167580	0.855111	0.742	0.33107	-6.008	0.106706	hsa-miR-644
ILMN_3168662	0.855111	0.743	0.32975	-6.0084	0.114688	hsa-miR-15a*
ILMN_3168377	0.855111	0.744	-0.32873	-6.0088	-0.075867		HS_87
ILMN_3168705	0.855111	0.744	-0.32841	-6.0089	-0.04242	hsa-miR-151-3p
ILMN_3168162	0.857929	0.747	-0.32416	-6.0102	-0.11567		HS_232
ILMN_3167870	0.85862	0.748	0.32237	-6.0108	0.107369	hsa-miR-17*
ILMN_3167815	0.859365	0.75	-0.3197	-6.0116	-0.109629	hsa-miR-570
ILMN_3168455	0.859365	0.751	0.31923	-6.0117	0.047582	hsa-miR-770-5p
ILMN_3168889	0.859365	0.751	-0.31852	-6.0119	-0.087841		solexa-2526-361
ILMN_3167054	0.860653	0.753	-0.31578	-6.0128	-0.034412		HS_49
ILMN_3168736	0.860653	0.754	-0.31504	-6.013	-0.053636	hsa-miR-491-3p
ILMN_3168822	0.862034	0.756	0.31244	-6.0138	0.062914	hsa-miR-1204
ILMN_3168075	0.86204	0.757	0.31143	-6.0141	0.120521	hsa-miR-518e*,hsa-miR-519a*,hsa-miR-519b-5p,hsa-miR-519c-5p,hsa-miR-522*,hsa-miR-523*
ILMN_3167466	0.862502	0.758	-0.3099	-6.0145	-0.060149		HS_143
ILMN_3168589	0.864338	0.76	-0.30677	-6.0155	-0.103335	hsa-miR-29a*
ILMN_3168167	0.864871	0.761	0.30504	-6.016	0.138935	hsa-miR-187
ILMN_3167778	0.864871	0.762	-0.30416	-6.0162	-0.07828	hsa-miR-525-3p
ILMN_3168005	0.865843	0.764	0.30134	-6.0171	0.02318	hsa-miR-26a
ILMN_3167993	0.865843	0.765	-0.30104	-6.0172	-0.088227		HS_157
ILMN_3167280	0.866046	0.766	-0.29931	-6.0177	-0.024334		HS_218
ILMN_3167213	0.866046	0.767	-0.29766	-6.0181	-0.064787		HS_107
ILMN_3167806	0.866046	0.767	-0.29742	-6.0182	-0.074721	hsa-miR-429
ILMN_3167819	0.866046	0.768	0.29681	-6.0184	0.148743	hsa-miR-522
ILMN_3167128	0.866221	0.769	0.29561	-6.0187	0.060391		solexa-603-1846
ILMN_3168888	0.866921	0.77	0.2938	-6.0192	0.086086		solexa-2502-366
ILMN_3168851	0.869817	0.773	-0.28924	-6.0205	-0.123034	hsa-miR-1290
ILMN_3168843	0.869817	0.774	0.28833	-6.0208	0.043076	hsa-miR-24-2*
ILMN_3167591	0.869817	0.776	-0.28637	-6.0213	-0.035492	hsa-miR-554
ILMN_3168227	0.869817	0.776	-0.28573	-6.0215	-0.06957	hsa-miR-548d-3p
ILMN_3168573	0.869817	0.776	-0.28543	-6.0216	-0.080919	hsa-miR-10b*
ILMN_3168652	0.87223	0.779	-0.2816	-6.0226	-0.177042	hsa-miR-34b
ILMN_3168671	0.877391	0.785	0.27456	-6.0245	0.061245	hsa-miR-548o
ILMN_3168659	0.879177	0.788	-0.27058	-6.0255	-0.12624	hsa-miR-1183
ILMN_3167282	0.879177	0.789	0.26869	-6.026	0.092779	hsa-miR-584
ILMN_3168809	0.879177	0.79	0.26786	-6.0262	0.036987	hsa-miR-1207-3p
ILMN_3168686	0.879177	0.79	0.26752	-6.0263	0.084645	hsa-miR-532-3p
ILMN_3168766	0.879177	0.79	-0.26746	-6.0263	-0.07596	hsa-miR-877
ILMN_3168676	0.879903	0.792	-0.26434	-6.0271	-0.107064	hsa-miR-16-1*
ILMN_3167879	0.879903	0.793	-0.26393	-6.0272	-0.02093		HS_251.1
ILMN_3166974	0.879903	0.793	0.26333	-6.0274	0.096712	hsa-miR-767-5p
ILMN_3168194	0.879903	0.794	-0.2626	-6.0276	-0.017818	hsa-miR-518f*,hsa-miR-518d-5p,hsa-miR-520c-5p,hsa-miR-526a
ILMN_3168723	0.880906	0.796	0.26041	-6.0281	0.113361	hsa-miR-874
ILMN_3168078	0.881997	0.797	0.25813	-6.0287	0.057452		HS_32
ILMN_3168649	0.882098	0.798	0.25699	-6.029	0.049802	hsa-miR-99b*
ILMN_3168548	0.882098	0.799	-0.256	-6.0292	-0.049481	hsa-miR-520d-3p
ILMN_3167824	0.885424	0.803	-0.25108	-6.0304	-0.072562	hsa-miR-668
ILMN_3168531	0.885617	0.804	0.24985	-6.0307	0.081271		HS_132.1
ILMN_3168673	0.885754	0.805	0.24853	-6.031	0.069146	hsa-miR-195*
ILMN_3168848	0.885754	0.806	0.24671	-6.0315	0.071161	hsa-miR-1287
ILMN_3168378	0.885754	0.806	-0.24667	-6.0315	-0.108347	hsa-miR-501-5p
ILMN_3168219	0.886936	0.808	0.24427	-6.032	0.029351		HS_105
ILMN_3168214	0.887465	0.81	0.24142	-6.0327	0.061039		HS_284.1
ILMN_3168828	0.887465	0.81	-0.24112	-6.0328	-0.118558	hsa-miR-1285
ILMN_3168658	0.887465	0.811	0.24063	-6.0329	0.037504	hsa-miR-892b
ILMN_3167757	0.891147	0.815	0.23526	-6.0341	0.028702	hsa-miR-518f:9.1
ILMN_3168913	0.893303	0.819	-0.23037	-6.0352	-0.032295		solexa-8000-104
ILMN_3168038	0.893303	0.819	0.22947	-6.0354	0.087203		HS_10
ILMN_3167091	0.893303	0.82	-0.2292	-6.0355	-0.112349	hsa-miR-205
ILMN_3168613	0.893303	0.82	0.22867	-6.0356	0.054022	hsa-miR-185*
ILMN_3167396	0.895633	0.823	-0.22411	-6.0366	-0.046396		HS_71.1
ILMN_3168679	0.895633	0.824	-0.22389	-6.0366	-0.04043	hsa-miR-1224-3p
ILMN_3167418	0.895835	0.825	-0.22263	-6.0369	-0.102916	hsa-miR-198
ILMN_3168670	0.898774	0.829	-0.21748	-6.038	-0.030837	hsa-miR-218-2*
ILMN_3168384	0.898774	0.829	0.21712	-6.0381	0.057308		HS_54
ILMN_3167456	0.900382	0.832	-0.21353	-6.0388	-0.019008	hsa-miR-145
ILMN_3168108	0.900382	0.832	0.21318	-6.0389	0.028607	hsa-miR-638
ILMN_3168398	0.90068	0.833	0.21181	-6.0392	0.040109		HS_186
ILMN_3168803	0.901908	0.835	0.20896	-6.0398	0.034925	hsa-miR-1323
ILMN_3168631	0.901908	0.836	-0.20799	-6.0399	-0.025028	hsa-miR-1261
ILMN_3168829	0.901908	0.837	0.20731	-6.0401	0.074464	hsa-miR-942
ILMN_3168383	0.909432	0.845	-0.19675	-6.0421	-0.039159		HS_19
ILMN_3167795	0.909432	0.845	-0.19624	-6.0422	-0.033581		HS_20
ILMN_3168813	0.909432	0.846	-0.19501	-6.0425	-0.103132	hsa-miR-885-5p
ILMN_3168458	0.909432	0.847	-0.19426	-6.0426	-0.048142		HS_257
ILMN_3167221	0.910342	0.848	0.19215	-6.043	0.045229	hsa-miR-485-5p
ILMN_3167501	0.911296	0.85	0.18999	-6.0434	0.041335	hsa-miR-138
ILMN_3168568	0.915693	0.855	-0.18371	-6.0445	-0.093207	hsa-miR-34c-3p
ILMN_3167360	0.915837	0.856	0.18251	-6.0447	0.04955	hsa-miR-92b
ILMN_3167787	0.916116	0.858	-0.17995	-6.0452	-0.0808	hsa-miR-19a
ILMN_3167808	0.916116	0.858	-0.17955	-6.0453	-0.048736	hsa-miR-101
ILMN_3167122	0.916116	0.859	0.17887	-6.0454	0.0474	hsa-miR-194
ILMN_3168022	0.916116	0.859	0.17808	-6.0455	0.065949	hsa-miR-769-3p
ILMN_3168310	0.916966	0.861	0.17603	-6.0459	0.046465		HS_5.1
ILMN_3168396	0.916966	0.862	-0.17501	-6.046	-0.047459	hsa-miR-671:9.1
ILMN_3168816	0.918427	0.864	0.17223	-6.0465	0.031092	hsa-miR-1274b
ILMN_3168784	0.920385	0.867	0.16795	-6.0472	0.006812	hsa-miR-302f
ILMN_3167878	0.920385	0.867	0.16782	-6.0472	0.050045		HS_42
ILMN_3168853	0.920685	0.868	-0.16644	-6.0474	-0.047044	hsa-miR-1291
ILMN_3167251	0.922261	0.872	0.16222	-6.0481	0.012218		HS_55
ILMN_3168168	0.922261	0.873	0.16117	-6.0483	0.087719	hsa-miR-519a
ILMN_3168821	0.922261	0.873	-0.16111	-6.0483	-0.046283	hsa-miR-1234
ILMN_3168878	0.922261	0.873	-0.16043	-6.0484	-0.015634	hsa-miR-1302
ILMN_3167002	0.924114	0.876	0.15716	-6.0489	0.032381	hsa-miR-200c
ILMN_3167705	0.925699	0.878	0.15422	-6.0493	0.073616		HS_263.1
ILMN_3168887	0.927537	0.881	-0.15028	-6.0499	-0.04004		solexa-15-44487
ILMN_3167284	0.927537	0.881	-0.14993	-6.05	-0.036	hsa-miR-549
ILMN_3167419	0.929846	0.885	0.14475	-6.0507	0.059396	hsa-miR-376a*:9.1
ILMN_3168674	0.929846	0.886	-0.14447	-6.0507	-0.020219	hsa-miR-220b
ILMN_3168830	0.929846	0.886	0.14404	-6.0508	0.024645	hsa-miR-29c*
ILMN_3168186	0.931416	0.888	0.1411	-6.0512	0.026712	hsa-miR-519b-3p
ILMN_3166957	0.932189	0.89	-0.13913	-6.0515	-0.040728	hsa-miR-182*
ILMN_3168533	0.934257	0.893	0.13558	-6.0519	0.02711	hsa-miR-548e
ILMN_3167714	0.936516	0.896	0.1308	-6.0525	0.04641	hsa-miR-455-5p
ILMN_3168092	0.936516	0.897	-0.12985	-6.0527	-0.054646		HS_217
ILMN_3168546	0.936516	0.897	-0.12972	-6.0527	-0.028912	hsa-miR-518e
ILMN_3168527	0.937816	0.899	-0.1271	-6.053	-0.026982		HS_111
ILMN_3167229	0.939795	0.902	-0.12356	-6.0534	-0.068779	hsa-miR-375
ILMN_3168666	0.939795	0.903	-0.12261	-6.0535	-0.020861	hsa-miR-33b*
ILMN_3168587	0.940322	0.905	0.12026	-6.0538	0.042954	hsa-miR-1307
ILMN_3168786	0.940322	0.905	-0.11969	-6.0539	-0.014318	hsa-miR-140-3p
ILMN_3168104	0.940322	0.906	-0.11884	-6.054	-0.009988		HS_12
ILMN_3168091	0.940977	0.907	-0.117	-6.0542	-0.031629	hsa-miR-660
ILMN_3168910	0.940978	0.908	-0.11596	-6.0543	-0.035543		solexa-7297-115
ILMN_3167953	0.941387	0.909	-0.11441	-6.0545	-0.030504	hsa-miR-873
ILMN_3168098	0.941481	0.91	0.11326	-6.0546	0.036862		HS_46
ILMN_3167886	0.942938	0.912	-0.11043	-6.0549	-0.043653		HS_35
ILMN_3167649	0.943646	0.914	-0.10852	-6.0551	-0.019865	hsa-miR-1251
ILMN_3168918	0.945544	0.917	0.10451	-6.0555	0.025137		solexa-9124-90
ILMN_3168070	0.945544	0.917	-0.1041	-6.0556	-0.021678	hsa-miR-653:9.1
ILMN_3167110	0.946583	0.919	0.10178	-6.0558	0.034381	hsa-miR-579
ILMN_3168294	0.948996	0.922	0.09776	-6.0562	0.010826	hsa-miR-200b
ILMN_3167325	0.951831	0.926	-0.09322	-6.0566	-0.046437	hsa-miR-34b*
ILMN_3168393	0.953613	0.929	0.08998	-6.0569	0.022312	hsa-miR-591
ILMN_3167303	0.953799	0.93	0.0887	-6.057	0.011174		solexa-3927-221
ILMN_3167769	0.955895	0.933	-0.08506	-6.0573	-0.007689	hsa-miR-93
ILMN_3168629	0.956627	0.934	-0.0831	-6.0575	-0.011851	hsa-miR-937
ILMN_3167401	0.957079	0.935	-0.08149	-6.0576	-0.013235		HS_201
ILMN_3167902	0.961963	0.941	-0.07392	-6.0582	-0.02974	hsa-miR-149
ILMN_3167195	0.961963	0.943	-0.07158	-6.0583	-0.010143	hsa-miR-367
ILMN_3168064	0.961963	0.943	-0.07131	-6.0583	-0.028624	hsa-miR-141
ILMN_3168837	0.961963	0.944	-0.07099	-6.0584	-0.034039	hsa-miR-190b
ILMN_3168017	0.961963	0.944	0.07016	-6.0584	0.016334		HS_114
ILMN_3167055	0.965789	0.949	-0.06367	-6.0588	-0.013786		HS_44.1
ILMN_3168314	0.965789	0.95	-0.06329	-6.0589	-0.022376	hsa-miR-133a
ILMN_3167562	0.967307	0.952	-0.06034	-6.059	-0.005992		HS_112
ILMN_3167559	0.968348	0.954	0.05798	-6.0592	0.021351		HS_188
ILMN_3168610	0.968486	0.955	0.05674	-6.0592	0.021861	hsa-miR-92b*
ILMN_3168865	0.971648	0.959	-0.05159	-6.0595	-0.011677	hsa-miR-1295
ILMN_3166988	0.971648	0.96	-0.05067	-6.0595	-0.02487	hsa-miR-33b
ILMN_3167082	0.971756	0.961	-0.04947	-6.0596	-0.008948		HS_244
ILMN_3168892	0.973673	0.964	0.04548	-6.0598	0.005423		solexa-2952-306
ILMN_3168273	0.973673	0.964	0.04494	-6.0598	0.012792	hsa-miR-503
ILMN_3168650	0.978255	0.97	-0.03814	-6.0601	-0.012316	hsa-miR-100*
ILMN_3168251	0.982892	0.976	0.03052	-6.0603	0.007242		HS_266.1
ILMN_3168776	0.982892	0.976	0.03019	-6.0603	0.009338	hsa-miR-147b
ILMN_3167267	0.986033	0.98	0.02518	-6.0605	0.001429	hsa-miR-373*
ILMN_3167142	0.986503	0.981	-0.0235	-6.0605	-0.003053		HS_13
ILMN_3168138	0.990673	0.987	0.01663	-6.0607	0.003526	hsa-miR-30e
ILMN_3168183	0.990673	0.987	0.0161	-6.0607	0.002314	hsa-miR-129-5p
ILMN_3166982	0.993981	0.991	-0.01086	-6.0607	-0.000737	hsa-miR-599
ILMN_3168667	0.996482	0.995	-0.00662	-6.0608	-0.002829	hsa-miR-136*
ILMN_3168684	0.997325	0.996	0.00446	-6.0608	0.001138	hsa-miR-26a-1*
ILMN_3167437	0.997642	0.998	-0.00297	-6.0608	-0.001233	hsa-miR-497
